# Supplementary material for: Triazine-pyridine chemistry for protein labelling on tyrosine
Source: Royal Society of Chemistry journal article supplement (doi:10.1039/d2cc01528e), 2022-01-01
Supplement: d2cc01528e1.xlsx [file d2cc01528e1.xlsx]

## Sheet: all_drug_target
PRU	count	p_values	q_values	GO	slim GO	function	enriched domain	enrichment -logQ
PRU00684	5	2.1639e-10	6.12098e-09	GO:0005515	GO:0005515	protein-binding	Soluble glutathione S-transferase N-terminal domain	27.2836
PRU01245	6	4.22136e-10	6.12098e-09	GO:0005509|GO:0005544	GO:0046872	metal ion binding	Annexin repeat	27.2836
PRU00573	3	1.14742e-07	1.10917e-06	GO:0000062	GO:0000166	nucleotide/nucleic acid binding	Acyl-CoA-binding (ACB) domain	19.7821
PRU00176	6	2.2462e-05	0.000162849	GO:0003676	GO:0003676	nucleotide/nucleic acid binding	RNA recognition motif (RRM) domain	12.5842
PRU00159	5	0.000912491	0.00529245	GO:0004672|GO:0005524|GO:0006468	GO:0000166	nucleotide/nucleic acid binding	Protein kinase domain	7.56185
PRU00666	1	0.00303412	0.0146649	GO:0031419|GO:0046872	GO:0046872	metal ion binding	B12-binding domain	6.09149
PRU00264	1	0.00454779	0.0188408	GO:0003677|GO:0008270	GO:0003676	nucleotide/nucleic acid binding	Zinc finger PARP-type	5.72999
PRU00842	1	0.00605921	0.0195241	GO:0016301|GO:0016772	GO:0003824	enzyme	Phosphagen kinase N-terminal domain	5.6786
PRU01137	1	0.00605921	0.0195241	GO:0016874	GO:0003824	enzyme	Coenzyme A (CoA) carboxyltransferase C-terminal domain	5.6786
PRU10106	1	0.00756838	0.0219483	GO:0005524	GO:0000166	nucleotide/nucleic acid binding	ATP synthase alpha and beta subunits	5.50975
PRU00439	1	0.0120824	0.0318537	GO:0006355	others	undefined	MAD homology domain 2 (MH2)	4.9724
PRU00285	1	0.0150806	0.0336414	0	others	undefined	Small heat shock protein (sHSP) domain	4.89362
PRU00686	1	0.0150806	0.0336414	GO:0009055|GO:0015035	GO:0003824	enzyme	Glutaredoxin domain	4.89362
PRU00474	1	0.0180699	0.0349351	GO:0003779	GO:0005515	protein-binding	Calponin-like repeat	4.83918
PRU00599	1	0.0180699	0.0349351	GO:0003779	GO:0005515	protein-binding	ADF-H domain	4.83918
PRU00167	1	0.0225371	0.0408485	GO:0043087	GO:0003824	enzyme	Ras-GAP	4.61357
PRU00837	1	0.0240218	0.0409783	GO:0000786|GO:0003677|GO:0006334	GO:0003676	nucleotide/nucleic acid binding	Linker histone H1/H5 globular (H15) domain	4.609
PRU00164	1	0.0299383	0.0482339	GO:0046907	others	undefined	RanBD1	4.37381
PRU00162	1	0.0372846	0.0540626	0	others	others/undefined	PWWP	4.20923
PRU00323	1	0.0358197	0.0540626	GO:0005540|GO:0007155	others	others/undefined	Link domain	4.20923
PRU00552	1	0.0546938	0.0720964	GO:0004386	GO:0003824	enzyme	Q motif	3.79393
PRU10001	1	0.0532549	0.0720964	GO:0016491	GO:0003824	enzyme	Short-chain dehydrogenases/reductases family	3.79393
PRU00267	1	0.0955025	0.120416	0	others	others/undefined	HMG boxes A and B DNA-binding domains	3.0539
PRU00224	1	0.126636	0.153018	GO:0005515	GO:0005515	protein-binding	WW/rsp5/WWP domain	2.70823
PRU00191	1	0.163122	0.189222	0	others	others/undefined	SH2 domain	2.40185
PRU00448	2	0.201061	0.22426	GO:0005509	others	others/undefined	EF-hand	2.15675
PRU00282	1	0.209053	0.224538	0	others	others/undefined	Solute carrier (Solcar) repeat	2.15497
PRU00125	1	0.21746	0.225227	0	others	others/undefined	LIM zinc-binding domain	2.15055
PRU00221	1	1	1	GO:0005515	GO:0005515	protein-binding	WD repeat	0

## Sheet: approved_drug_target
PRU	count	p_values	q_values	GO	slim GO	function	enriched domain	enrichment -logQ
PRU01245	7	2.99597e-13	6.29154e-12	GO:0005509|GO:0005544	GO:0046872	metal ion binding	Annexin repeat	37.2097
PRU00684	4	9.32576e-09	9.79205e-08	GO:0005515	GO:0005515	protein-binding	Soluble glutathione S-transferase N-terminal domain	23.2838
PRU00666	2	1.09716e-06	7.68014e-06	GO:0031419|GO:0046872	GO:0046872	metal ion binding	B12-binding domain	16.9904
PRU00159	4	0.00182509	0.00958172	GO:0004672|GO:0005524|GO:0006468	GO:0000166	nucleotide/nucleic acid binding	Protein kinase domain	6.7055
PRU00264	1	0.0031849	0.012733	GO:0003677|GO:0008270	GO:0003676	nucleotide/nucleic acid binding	Zinc finger PARP-type	6.29528
PRU00842	1	0.00424435	0.012733	GO:0016301|GO:0016772	GO:0003824	enzyme	Phosphagen kinase N-terminal domain	6.29528
PRU01137	1	0.00424435	0.012733	GO:0016874	GO:0003824	enzyme	Coenzyme A (CoA) carboxyltransferase C-terminal domain	6.29528
PRU00686	1	0.0105781	0.0277674	GO:0009055|GO:0015035	GO:0003824	enzyme	Glutaredoxin domain	5.17046
PRU00599	1	0.0126806	0.0295881	GO:0003779	GO:0005515	protein-binding	ADF-H domain	5.07884
PRU00837	1	0.0168727	0.0354326	GO:0000786|GO:0003677|GO:0006334	GO:0003676	nucleotide/nucleic acid binding	Linker histone H1/H5 globular (H15) domain	4.81878
PRU00164	1	0.0210474	0.0401814	GO:0046907	others	undefined	RanBD1	4.63733
PRU00162	1	0.0262417	0.0423904	0	others	undefined	PWWP	4.56012
PRU00323	1	0.025205	0.0423904	GO:0005540|GO:0007155	others	others	Link domain	4.56012
PRU00552	1	0.0385988	0.0540384	GO:0004386	GO:0003824	enzyme	Q motif	4.20987
PRU10001	1	0.0375749	0.0540384	GO:0016491	GO:0003824	enzyme	Short-chain dehydrogenases/reductases family	4.20987
PRU00267	1	0.0678364	0.0890353	0	others	others/undefined	HMG boxes A and B DNA-binding domains	3.48948
PRU00191	1	0.117172	0.136701	0	others	others/undefined	SH2 domain	2.8709
PRU00448	2	0.11421	0.136701	GO:0005509	others	others/undefined	EF-hand	2.8709
PRU00282	1	0.151368	0.167301	0	others	others/undefined	Solute carrier (Solcar) repeat	2.57948
PRU00176	1	0.331801	0.348392	GO:0003676	GO:0003676	nucleotide/nucleic acid binding	RNA recognition motif (RRM) domain	1.52122
PRU00221	1	0.554635	0.554635	GO:0005515	GO:0005515	protein-binding	WD repeat	0.850389

## Sheet: uniprot_human_repeat1
PRU	count	p_values	q_values	GO	slim GO	function	enriched domain	enrichment -logQ	q_values in reapeat 2
PRU00042	1	3.82633e-16	2.83149e-14	0	others	undefined	Zinc finger C2H2-type	45.0054	1.08057e-13
PRU00176	20	3.85657e-15	1.42693e-13	GO:0003676	GO:0003676	nucleotide/nucleic acid binding	RNA recognition motif (RRM) domain	42.6722	1.1267e-10
PRU00047	8	2.8813e-10	7.10721e-09	GO:0003676|GO:0008270	GO:0003676	nucleotide/nucleic acid binding	Zinc finger CCHC-type	27.0681	3.92642e-09
PRU00972	4	5.64104e-10	1.04359e-08	0	others	undefined	MRG domain	26.5139	0.000628315
PRU01245	7	1.89766e-08	2.80854e-07	GO:0005509|GO:0005544	GO:0046872	metal ion binding	Annexin repeat	21.7637	6.46932e-09
PRU00170	3	4.65641e-07	5.74291e-06	0	others	undefined	Reticulon	17.4098	3.70684e-06
PRU00573	3	4.03028e-06	4.26058e-05	GO:0000062	GO:0000166	nucleotide/nucleic acid binding	Acyl-CoA-binding (ACB) domain	14.5186	2.00697e-07
PRU00684	4	4.64358e-06	4.29531e-05	GO:0005515	GO:0005515	protein-binding	Soluble glutathione S-transferase N-terminal domain	14.5069	7.25008e-07
PRU00162	4	6.58299e-06	4.87141e-05	0	others	undefined	PWWP	14.3253	3.7216e-05
PRU00724	3	6.42511e-06	4.87141e-05	0	others	undefined	CID domain	14.3253	3.7216e-05
PRU00386	2	2.40472e-05	0.000161772	0	others	undefined	SGS domain	12.5937	0.000113275
PRU00552	4	3.28248e-05	0.00020242	GO:0004386	GO:0003824	enzyme	Q motif	12.2704	6.92191e-06
PRU00109	2	0.00014335	0.000801578	0	others	undefined	HORMA	10.2849	#N/A
PRU00125	6	0.00015165	0.000801578	0	others	undefined	LIM zinc-binding domain	10.2849	7.52787e-05
PRU00277	3	0.000219161	0.0010812	GO:0003755	GO:0003824	enzyme	PPIase FKBP-type domain	9.85316	0.000874329
PRU01040	2	0.000238144	0.00110142	0	others	undefined	DZF domain	9.82642	0.0516486
PRU00507	2	0.000496873	0.00216286	0	others	undefined	NAC-A/B (NAC-alpha/beta) domain	8.85285	0.0639708
PRU00413	2	0.0012846	0.00528112	GO:0003779	GO:0005515	protein-binding	Cortactin repeat	7.56494	1.1267e-10
PRU00474	2	0.00153654	0.0056852	GO:0003779	GO:0005515	protein-binding	Calponin-like repeat	7.45857	0.00561684
PRU00599	2	0.00153654	0.0056852	GO:0003779	GO:0005515	protein-binding	ADF-H domain	7.45857	0.000113275
PRU00252	1	0.00491893	0.0173334	GO:0003697	GO:0003676	nucleotide/nucleic acid binding	SSB domain	5.8503
PRU00448	8	0.00580743	0.0195341	GO:0005509	GO:0046872	metal ion binding	EF-hand	5.67786
PRU00224	3	0.00974107	0.0290489	GO:0005515	GO:0005515	protein-binding	WW/rsp5/WWP domain	5.10537
PRU00354	1	0.00981381	0.0290489	GO:0016740|GO:0006596	GO:0003824	enzyme	Polyamine biosynthesis (PABS) domain	5.10537
PRU00952	1	0.00981381	0.0290489	GO:0016429|GO:0030488|GO:0031515	GO:0003824	enzyme	tRNA (adenine(57)-N(1)/adenine(58)-N(1) or adenine(58)-N(1))-	5.10537
PRU00195	1	0.0146848	0.0350539	0	others	undefined	SoHo domain	4.83428
PRU00264	1	0.0146848	0.0350539	GO:0003677|GO:0008270	GO:0003676	nucleotide/nucleic acid binding	Zinc finger PARP-type	4.83428
PRU00266	2	0.0135771	0.0350539	GO:0003723	GO:0003676	nucleotide/nucleic acid binding	Double stranded RNA-binding domain	4.83428
PRU00318	1	0.0146848	0.0350539	GO:0003723	GO:0003676	nucleotide/nucleic acid binding	Pumilio homology domain	4.83428
PRU00690	1	0.0146848	0.0350539	0	others	undefined	Nop domain	4.83428
PRU01012	1	0.0146848	0.0350539	0	others	undefined	SAM-dependent methyltransferase TRM10-type domain	4.83428
PRU00200	1	0.0195319	0.0425106	GO:0003743|GO:0006413	GO:0003676	nucleotide/nucleic acid binding	SUI1	4.55603
PRU00842	1	0.0195319	0.0425106	GO:0016301|GO:0016772	GO:0003824	enzyme	Phosphagen kinase N-terminal domain	4.55603
PRU01137	1	0.0195319	0.0425106	GO:0016874	GO:0003824	enzyme	Coenzyme A (CoA) carboxyltransferase C-terminal domain	4.55603
PRU00659	1	0.0243553	0.0487107	0	others	undefined	C-CAP/cofactor C-like domain	4.35962
PRU00998	1	0.0243553	0.0487107	GO:0031110	others	undefined	Stathmin-like (SLD) domain	4.35962
PRU10106	1	0.0243553	0.0487107	GO:0005524	GO:0000166	nucleotide/nucleic acid binding	ATP synthase alpha and beta subunits	4.35962
PRU00240	1	0.0291552	0.0539371	GO:0003723|GO:0004000|GO:0006396	GO:0003824	enzyme	Adenosine to inosine editase domain	4.21258
PRU00472	1	0.0291552	0.0539371	GO:0003676|GO:0006351|GO:0008270	GO:0003676	nucleotide/nucleic acid binding	Zinc finger TFIIS-type	4.21258
PRU00636	1	0.0291552	0.0539371	GO:0008270	others	others/undefined	PET domain	4.21258
PRU00159	6	0.0362129	0.0653599	GO:0004672|GO:0005524|GO:0006468	GO:0000166	nucleotide/nucleic acid binding	Protein kinase domain	3.93545
PRU00439	1	0.0386846	0.0681586	GO:0006355	others	others/undefined	MAD homology domain 2 (MH2)	3.87496
PRU00243	1	0.0434144	0.0730151	0	others	others/undefined	ENTH domain	3.77566
PRU00561	1	0.0434144	0.0730151	GO:0006606|GO:0061608	others	others/undefined	IBB domain	3.77566
PRU00285	1	0.0481211	0.0774121	0	others	others/undefined	Small heat shock protein (sHSP) domain	3.6913
PRU00686	1	0.0481211	0.0774121	GO:0009055|GO:0015035	GO:0003824	enzyme	Glutaredoxin domain	3.6913
PRU01188	2	0.0515885	0.0812244	0	others	others/undefined	Intermediate filament (IF) rod domain	3.62194
PRU00115	1	0.0621034	0.0957427	GO:0006886|GO:0008536	GO:0005515	protein-binding	Importin N-terminal	3.38469
PRU00023	1	0.0672728	0.0995637	GO:0005515	GO:0005515	protein-binding	ANK repeat	3.32824
PRU00490	1	0.0667187	0.0995637	0	others	others/undefined	Macro domain	3.32824
PRU00167	1	0.0713114	0.103471	GO:0043087	GO:0003824	enzyme	Ras-GAP	3.2727
PRU00837	1	0.0758816	0.105948	GO:0000786|GO:0003677|GO:0006334	GO:0003676	nucleotide/nucleic acid binding	Linker histone H1/H5 globular (H15) domain	3.23857
PRU01204	1	0.0758816	0.105948	GO:0003676	GO:0003676	nucleotide/nucleic acid binding	Cold-shock (CSD) domain	3.23857
PRU00164	1	0.0939401	0.128733	GO:0046907	others	others/undefined	RanBD1	2.95755
PRU00317	1	0.0983997	0.132392	GO:0003723	GO:0003676	nucleotide/nucleic acid binding	Pumilio repeat	2.91711
PRU00191	2	0.113318	0.147115	0	others	others/undefined	SH2 domain	2.76499
PRU00323	1	0.111648	0.147115	GO:0005540|GO:0007155	others	others/undefined	Link domain	2.76499
PRU00081	1	0.124703	0.159103	0	others	others/undefined	F5/8 type C	2.65196
PRU00211	1	0.146038	0.183166	0	others	others/undefined	Tudor	2.44877
PRU00685	1	0.150243	0.185299	0	others	others/undefined	Soluble glutathione S-transferase C-terminal domain	2.43207
PRU10001	1	0.162734	0.197415	GO:0016491	GO:0003824	enzyme	Short-chain dehydrogenases/reductases family	2.3407
PRU00127	1	0.170959	0.204048	0	others	others/undefined	MAGE	2.29302
PRU00782	1	0.175042	0.205605	GO:0003774|GO:0005524|GO:0016459	GO:0000166	nucleotide/nucleic acid binding	Myosin motor domain	2.28205
PRU00388	1	0.179105	0.20709	0	others	others/undefined	Ubiquitin-conjugating (UBC) core domain	2.27167
PRU00192	3	0.191559	0.218082	GO:0005515	GO:0005515	protein-binding	Src homology 3 (SH3) domain	2.19705
PRU00283	1	0.199122	0.223258	GO:0003777|GO:0005524|GO:0007018|GO:0008017	GO:0005515	protein-binding	Kinesin motor domain	2.16322
PRU00212	1	0.218654	0.241499	0	others	others/undefined	UBA	2.04991
PRU00267	1	0.278031	0.302563	0	others	others/undefined	HMG boxes A and B DNA-binding domains	1.72469
PRU00563	2	0.348602	0.373864	0	others	others/undefined	Nebulin repeat	1.41942
PRU00221	5	0.424609	0.44255	GO:0005515	GO:0005515	protein-binding	WD repeat	1.17609
PRU00542	1	0.419183	0.44255	0	others	others/undefined	Helicase C-terminal domain	1.17609
PRU00235	1	0.449953	0.462452	0	others	others/undefined	RCC1 repeat	1.11263
PRU00723	1	0.473919	0.480411	GO:0046872	others	others/undefined	Zinc finger C3H1-type	1.05766
PRU00282	1	0.532875	0.532875	0	others	others/undefined	Solute carrier (Solcar) repeat	0.908131

## Sheet: uniprot_human_repeat2
PRU	count	p_values	q_values	GO	slim GO	function	enriched domain	enrichment -logQ
PRU00042	1	1.54367e-15	1.08057e-13	0	others	undefined	Zinc finger C2H2-type	43.0733
PRU00176	17	3.96907e-12	1.1267e-10	GO:0003676	GO:0003676	nucleotide/nucleic acid binding	RNA recognition motif (RRM) domain	33.0472
PRU00413	6	4.82874e-12	1.1267e-10	GO:0003779	GO:0005515	protein-binding	Cortactin repeat	33.0472
PRU00047	8	2.24367e-10	3.92642e-09	GO:0003676|GO:0008270	GO:0003676	nucleotide/nucleic acid binding	Zinc finger CCHC-type	27.9241
PRU01245	8	4.62094e-10	6.46932e-09	GO:0005509|GO:0005544	GO:0046872	metal ion binding	Annexin repeat	27.2037
PRU00573	4	1.72026e-08	2.00697e-07	GO:0000062	GO:0000166	nucleotide/nucleic acid binding	Acyl-CoA-binding (ACB) domain	22.2485
PRU00684	5	7.25008e-08	7.25008e-07	GO:0005515	GO:0005515	protein-binding	Soluble glutathione S-transferase N-terminal domain	20.3955
PRU00170	3	4.23639e-07	3.70684e-06	0	others	undefined	Reticulon	18.0414
PRU00552	5	8.8996e-07	6.92191e-06	GO:0004386	GO:0003824	enzyme	Q motif	17.1404
PRU00162	4	5.81501e-06	3.7216e-05	0	others	undefined	PWWP	14.7137
PRU00724	3	5.84822e-06	3.7216e-05	0	others	undefined	CID domain	14.7137
PRU00125	7	1.29049e-05	7.52787e-05	0	others	undefined	LIM zinc-binding domain	13.6974
PRU00386	2	2.25813e-05	0.000113275	0	others	undefined	SGS domain	13.1079
PRU00599	3	2.2655e-05	0.000113275	GO:0003779	GO:0005515	protein-binding	ADF-H domain	13.1079
PRU00972	2	0.000134639	0.000628315	0	others	undefined	MRG domain	10.6362
PRU00277	3	0.000199847	0.000874329	GO:0003755	GO:0003824	enzyme	PPIase FKBP-type domain	10.1595
PRU00224	4	0.00088586	0.00364766	GO:0005515	GO:0005515	protein-binding	WW/rsp5/WWP domain	8.09881
PRU00474	2	0.00144433	0.00561684	GO:0003779	GO:0005515	protein-binding	Calponin-like repeat	7.47603
PRU00252	1	0.00476711	0.017563	GO:0003697	GO:0003676	nucleotide/nucleic acid binding	SSB domain	5.83131
PRU00952	1	0.00951164	0.0332907	GO:0016429|GO:0030488|GO:0031515	GO:0003824	enzyme	tRNA (adenine(57)-N(1)/adenine(58)-N(1) or adenine(58)-N(1))-	4.90874
PRU00195	1	0.0142337	0.0415149	0	others	undefined	SoHo domain	4.59023
PRU00264	1	0.0142337	0.0415149	GO:0003677|GO:0008270	GO:0003676	nucleotide/nucleic acid binding	Zinc finger PARP-type	4.59023
PRU00266	2	0.0127929	0.0415149	GO:0003723	GO:0003676	nucleotide/nucleic acid binding	Double stranded RNA-binding domain	4.59023
PRU00690	1	0.0142337	0.0415149	0	others	undefined	Nop domain	4.59023
PRU00388	2	0.0156436	0.0438022	GO:0016874	GO:0003824	enzyme	Ubiquitin-conjugating (UBC) core domain	4.51285
PRU00200	1	0.0189334	0.0490865	GO:0003743|GO:0006413	GO:0003676	nucleotide/nucleic acid binding	SUI1	4.34853
PRU00842	1	0.0189334	0.0490865	GO:0016301|GO:0016772	GO:0003824	enzyme	Phosphagen kinase N-terminal domain	4.34853
PRU00574	1	0.0236108	0.0516486	0	others	others/undefined	DCUN1 domain	4.27513
PRU00659	1	0.0236108	0.0516486	0	others	others/undefined	C-CAP/cofactor C-like domain	4.27513
PRU00998	1	0.0236108	0.0516486	GO:0031110	others	others/undefined	Stathmin-like (SLD) domain	4.27513
PRU01040	1	0.0236108	0.0516486	0	others	others/undefined	DZF domain	4.27513
PRU10106	1	0.0236108	0.0516486	GO:0005524	GO:0000166	nucleotide/nucleic acid binding	ATP synthase alpha and beta subunits	4.27513
PRU00472	1	0.0282661	0.0581948	GO:0003676|GO:0006351|GO:0008270	GO:0003676	nucleotide/nucleic acid binding	Zinc finger TFIIS-type	4.10297
PRU00636	1	0.0282661	0.0581948	GO:0008270	others	others/undefined	PET domain	4.10297
PRU00159	6	0.0317976	0.0635952	GO:0004672|GO:0005524|GO:0006468	GO:0000166	nucleotide/nucleic acid binding	Protein kinase domain	3.97494
PRU00507	1	0.0328993	0.0639708	0	others	others/undefined	NAC-A/B (NAC-alpha/beta) domain	3.96644
PRU00439	1	0.0375105	0.0709659	GO:0006355	others	others/undefined	MAD homology domain 2 (MH2)	3.81673
PRU00243	1	0.0420999	0.075564	0	others	others/undefined	ENTH domain	3.72616
PRU01023	1	0.0420999	0.075564	GO:0008168	GO:0003824	enzyme	SAM-dependent MTase RsmB/NOP-type domain	3.72616
PRU00285	1	0.0466676	0.0796764	0	others	others/undefined	Small heat shock protein (sHSP) domain	3.6497
PRU00686	1	0.0466676	0.0796764	GO:0009055|GO:0015035	GO:0003824	enzyme	Glutaredoxin domain	3.6497
PRU00115	1	0.0602411	0.100402	GO:0006886|GO:0008536	GO:0005515	protein-binding	Importin N-terminal	3.31614
PRU00490	1	0.0647228	0.105363	0	others	others/undefined	Macro domain	3.24656
PRU00167	1	0.0691833	0.110064	GO:0043087	GO:0003824	enzyme	Ras-GAP	3.18358
PRU00837	1	0.0736226	0.114524	GO:0000786|GO:0003677|GO:0006334	GO:0003676	nucleotide/nucleic acid binding	Linker histone H1/H5 globular (H15) domain	3.12628
PRU00164	1	0.0911705	0.138738	GO:0046907	others	others/undefined	RanBD1	2.84957
PRU00023	1	0.0984469	0.145571	GO:0005515	GO:0005515	protein-binding	ANK repeat	2.7802
PRU00639	1	0.0998202	0.145571	GO:0030246	others	others/undefined	Galactoside-binding lectin (galectin) domain	2.7802
PRU00156	1	0.108388	0.151743	GO:0000413|GO:0003755	GO:0003824	enzyme	PPIase cyclophilin-type domain	2.72029
PRU00191	2	0.107602	0.151743	0	others	others/undefined	SH2 domain	2.72029
PRU01146	1	0.112642	0.154606	0	others	others/undefined	Extended PHD (ePHD) domain	2.69333
PRU00081	1	0.121088	0.163003	0	others	others/undefined	F5/8 type C	2.61703
PRU00723	2	0.127879	0.168896	GO:0046872	others	others/undefined	Zinc finger C3H1-type	2.56579
PRU00685	1	0.145952	0.189197	0	others	others/undefined	Soluble glutathione S-transferase C-terminal domain	2.40204
PRU10001	1	0.15812	0.201244	GO:0016491	GO:0003824	enzyme	Short-chain dehydrogenases/reductases family	2.31298
PRU00171	1	0.162138	0.202672	0	others	others/undefined	RGS	2.30278
PRU00127	1	0.166137	0.204027	0	others	others/undefined	MAGE	2.29317
PRU00192	3	0.179913	0.217136	GO:0005515	GO:0005515	protein-binding	Src homology 3 (SH3) domain	2.20333
PRU00103	1	0.189734	0.222165	0	others	others/undefined	HEAT_repeat	2.17029
PRU00283	1	0.193601	0.222165	GO:0003777|GO:0005524|GO:0007018|GO:0008017	GO:0005515	protein-binding	Kinesin motor domain	2.17029
PRU00448	5	0.192849	0.222165	GO:0005509	others	others/undefined	EF-hand	2.17029
PRU00084	1	0.212667	0.236296	GO:0005856	others	others/undefined	FERM	2.08133
PRU00212	1	0.212667	0.236296	0	others	others/undefined	UBA	2.08133
PRU00267	1	0.270717	0.296097	0	others	others/undefined	HMG boxes A and B DNA-binding domains	1.75586
PRU01188	1	0.298127	0.32106	0	others	others/undefined	Intermediate filament (IF) rod domain	1.63908
PRU00117	1	0.340501	0.361138	0	others	others/undefined	KH domain	1.46938
PRU00235	1	0.439686	0.459374	0	others	others/undefined	RCC1 repeat	1.12226
PRU00282	1	0.521744	0.537089	0	others	others/undefined	Solute carrier (Solcar) repeat	0.896766
PRU00221	4	0.784795	0.796169	GO:0005515	GO:0005515	protein-binding	WD repeat	0.328853
PRU00563	1	1	1	0	others	others/undefined	Nebulin repeat	0
