# Supplementary material for: Triazine-pyridine chemistry for protein labelling on tyrosine
Source: Royal Society of Chemistry journal article supplement (doi:10.1039/d2cc01528e), 2022-01-01
Supplement: d2cc01528e2.xlsx [file d2cc01528e2.xlsx]

## Sheet: Modefied peptides_homo_Repeat 1
Proteins	Positions within proteins	Leading proteins	Protein	Protein names	Gene names	Fasta headers	Localization prob	Score diff	PEP	Score	Delta score	Score for localization	Localization prob DADPSE1-1	Score diff DADPSE1-1	PEP DADPSE1-1	Score DADPSE1-1	Localization prob DADPSE1-2	Score diff DADPSE1-2	PEP DADPSE1-2	Score DADPSE1-2	Localization prob DADPSE1-3	Score diff DADPSE1-3	PEP DADPSE1-3	Score DADPSE1-3	Diagnostic peak	Number of B2	Amino acid	Sequence window	Modification window	Peptide window coverage	B2 Probabilities	B2 Score diffs	Position in peptide	Charge	Mass error [ppm]	Identification type DADPSE1-1	Identification type DADPSE1-2	Identification type DADPSE1-3	Intensity	Intensity___1	Intensity___2	Intensity___3	Ratio mod/base	Intensity DADPSE1-1	Intensity DADPSE1-2	Intensity DADPSE1-3	Ratio mod/base DADPSE1-1	Ratio mod/base DADPSE1-2	Ratio mod/base DADPSE1-3
D6R9P3;D6RD18;B4DMY3;D6RBZ0;Q53F64;Q99729	240;240;231;240;240;240	D6R9P3	D6R9P3	Heterogeneous nuclear ribonucleoprotein A/B	HNRNPAB		0.926357	13.3903	4.35618e-20	183.85	163.67	92.538	0.926357	13.3903	9.26538e-05	92.538	0.681012	5.18087	4.35618e-20	183.85	0.533874	5.08417	0.000315738	94.801		1;2	Y	EIKVAQPKEVYQQQQYGSGGRGNRNRGNRGS	X;X;X;X;X;X;X;X;X;X;B2;X;X;X;X;B2;X;X;X;X;X;X;X;X;X;X;X;X;X;X;X	XXXXXXXXPPPPPPPPPPPPPXXXXXXXXXX	EVYQQQQ(0.018)Y(0.926)GS(0.042)GGR(0.013)	E(-75.62)VY(-62.77)Q(-62.77)Q(-48.77)Q(-33.47)Q(-17.15)Y(13.39)GS(-13.39)GGR(-18.55)	8	2	-0.32275	By MS/MS	By MS/MS	By MS/MS	466940000	374980000	91956000	0	2.4453	407140000	34470000	25325000	8.4499	0.59219	0.29949
Q8WVW5;Q53G99;Q1KLZ0;P63261;P60709;B4E335;B4E3A4;Q53GK6;Q53G76;B4DVQ0;B4DW52;A0A2R8Y793;B3KWQ3;Q6PJ43;B7ZAP6;Q96FU6;V9HVZ7;Q96DE1;A4UCT3;A5GZ75;F1BXA6;Q9UE89	282;294;294;294;294;270;275;294;294;252;266;278;172;182;213;84;142;78;88;85;62;33	Q8WVW5	Q8WVW5	Actin, cytoplasmic 2;Actin, cytoplasmic 2, N-terminally processed;Actin, cytoplasmic 1;Actin, cytoplasmic 1, N-terminally processed	PS1TP5BP1;ACTG1;ACTB;HEL-176		0.920175	13.8155	1.34021e-16	116.58	92.725	89.831	0.900174	13.3905	2.70357e-10	96.673	0.739387	6.72715	3.42446e-05	76.492	0.920175	13.8155	1.34021e-16	116.58		1;2	Y	FNSIMKCDVDIRKDLYANTVLSGGTTMYPGI	X;X;X;X;X;X;X;X;X;X;X;X;X;X;X;B2;X;X;X;X;X;X;X;X;X;X;X;B2;X;X;X	XXXXXXXXXXXXPPPPPPPPPPPPPPPPPPP	D(0.038)LY(0.92)AN(0.032)T(0.01)VLSGGTTMYPGIADR	D(-13.82)LY(13.82)AN(-14.61)T(-19.76)VLS(-48.03)GGT(-62.29)T(-67.07)M(-67.07)Y(-71.45)PGIAD(-83.01)R(-84.9)	3	3	-1.5008	By MS/MS	By MS/MS	By MS/MS	2488800000	2403100000	85686000	0	0.72411	233580000	739910000	1031200000	0.24402	0.56927	0.87381
V9HWE9;P09211;A8MX94;Q5D6A5;A0A2R8Y5E5	4;4;4;4;4	V9HWE9	V9HWE9	Glutathione S-transferase P	HEL-S-22;GSTP1		0.99262	21.2874	3.50033e-11	133.23	104.51	133.23	0.99262	21.2874	3.50033e-11	133.23	0.9686	14.9129	8.0194e-10	130.96	0.969276	14.9975	1.18546e-05	85.958		1;2	Y	____________MPPYTVVYFPVRGRCAALR	X;X;X;X;X;X;X;X;X;X;X;X;X;X;X;B2;X;X;X;B2;X;X;X;X;X;X;X;X;X;X;X	XXXXXXXXXXXXPPPPPPPPPPPPXXXXXXX	PPY(0.993)T(0.007)VVYFPVR	PPY(21.29)T(-21.29)VVY(-83.38)FPVR(-117.82)	3	2	-2.2625	By MS/MS	By MS/MS	By MS/MS	1863400000	1856600000	6759600	0	2.3546	79673000	95143000	102540000	0.28344	0.33265	0.45721
B4DY28;A0A384P5K2;P21291;Q9BTA4;Q6ZMS3;B4E2T4;E9PND2;E9PS42;Q59EQ5;Q6AI18;E9PP21	71;71;71;46;69;71;34;71;70;33;38	B4DY28	B4DY28	Cysteine and glycine-rich protein 1	CSRP1;DKFZp686M148		0.999187	30.9018	3.89204e-09	113.38	96.747	103.43	0.976648	16.2161	3.89204e-09	113.38	0.999187	30.9018	1.13738e-06	103.43	0.958487	13.9549	4.74391e-05	74.444		1;2	Y	IYCKSCYGKKYGPKGYGYGQGAGTLSTDKGE	X;X;X;B2;X;X;X;X;X;X;X;X;X;X;X;B2;X;B2;X;X;X;X;X;X;X;X;X;X;X;X;X	XXXXXXXXXXXXXXPPPPPPPPPPPPPPPPP	GY(0.999)GY(0.001)GQGAGTLSTDK	GY(30.9)GY(-30.9)GQ(-60.62)GAGT(-86.81)LS(-94.69)T(-100.93)D(-102.64)K(-103.43)	2	2	0.15073	By MS/MS	By MS/MS	By MS/MS	6708600000	6484800000	223820000	0	24.889	891550000	1251300000	1416500000	10.232	14.268	14.955
V9HWE9;P09211;A8MX94;Q5D6A5;A0A2R8Y5E5	8;8;8;8;8	V9HWE9	V9HWE9	Glutathione S-transferase P	HEL-S-22;GSTP1		0.997457	25.9388	2.18127e-08	126.41	99.083	94.309	0.994098	23.1291	1.95354e-05	96.331	0.332993	0	5.70057e-08	110.87	0.997457	25.9388	2.18127e-08	126.41		1;2	Y	________MPPYTVVYFPVRGRCAALRMLLA	X;X;X;X;X;X;X;X;X;X;X;B2;X;X;X;B2;X;X;X;X;X;X;X;X;X;X;X;X;X;X;X	XXXXXXXXPPPPPPPPPPPPXXXXXXXXXXX	PPYTVVY(0.997)FPVR(0.003)	PPY(-68.19)T(-57.2)VVY(25.94)FPVR(-25.94)	7	2	-1.1645	By MS/MS		By MS/MS	435720000	428960000	6759600	0	0.55059	108740000	0	134270000	0.38686	0	0.59872
V9HWE9;P09211;C7DJS1	112;112;56	V9HWE9	V9HWE9	Glutathione S-transferase P	HEL-S-22;GSTP1		0.711159	5.98601	3.02737e-05	73.464	61.974	56.817	0.483579	0	0.000421481	51.762	0.711159	5.98601	3.02737e-05	65.107	0.475687	0	8.43033e-05	73.464		1;2	Y	VEDLRCKYISLIYTNYEAGKDDYVKALPGQL	X;X;X;X;X;X;X;X;X;X;X;X;B2;X;X;B2;X;X;X;X;X;X;X;X;X;X;X;X;X;B2;X	XXXXXXXPPPPPPPPPPPPPPPPPPXXXXXX	Y(0.001)IS(0.042)LIY(0.378)T(0.378)N(0.378)Y(0.711)E(0.108)AGK(0.004)DDYVK	Y(-25.71)IS(-9.73)LIY(0)T(0)N(0)Y(5.99)E(-8.5)AGK(-23.51)D(-37.26)D(-42.98)Y(-42.78)VK(-42.34)	9	3	-0.83162		By MS/MS		248770000	24610000	224160000	0	0.43378	0	248770000	0	0	1.226	0
P22626;A0A384NL58;A0A024RA28	247;247;195	P22626	P22626	Heterogeneous nuclear ribonucleoproteins A2/B1	HNRNPA2B1;HNRPA2B1		0.49999	0	8.41205e-58	159.69	152.97	58.26	0.25	0	1.51532e-25	126.63	0.25	0	8.41205e-58	159.69	0.49999	0	2.59933e-33	134.68		2	Y	DGYGSGRGFGDGYNGYGGGPGGGNFGGSPGY	B2;X;X;X;X;X;X;X;X;X;X;X;X;X;X;X;X;X;X;X;X;X;X;X;X;X;X;X;X;X;X	XXXXXXXXXXXXXXXXXXXXXXXXXXXXXXX	GFGD(0.5)GY(0.5)N(0.5)GY(0.5)GGGPGGGN(0.001)FGGSPGYGGGR	GFGD(0)GY(0)N(0)GY(0)GGGPGGGN(-26.18)FGGS(-44.05)PGY(-40.15)GGGR(-46.8)	9	3	-1.8386		By matching	By MS/MS	104130000	0	104130000	0	0.55045	0	26528000	77605000	0	0.49025	0.74852
B4DY28;A0A384P5K2;P21291;Q9BTA4;Q6ZMS3;B4E2T4;E9PND2;E9PS42;Q59EQ5;Q6AI18;E9PP21	73;73;73;48;71;73;36;73;72;35;40	B4DY28	B4DY28	Cysteine and glycine-rich protein 1	CSRP1;DKFZp686M148		0.569563	0	7.04576e-05	64.675	55.72	54.223	0.569563	0	7.14331e-05	54.223	0.331631	0	0.000158413	64.675	0.544886	0	7.04576e-05	59.57		2	Y	CKSCYGKKYGPKGYGYGQGAGTLSTDKGESL	X;B2;X;X;X;X;X;X;X;X;X;X;X;B2;X;B2;X;X;X;X;X;X;X;X;X;X;X;X;X;X;X	XXXXXXXXXXXXPPPPPPPPPPPPPPPPPPP	GY(0.736)GY(0.57)GQ(0.57)GAGT(0.117)LS(0.005)T(0.002)D(0.001)KGESLGIK	GY(2.05)GY(0)GQ(0)GAGT(-7.24)LS(-20)T(-25.46)D(-30.62)K(-35.45)GE(-47.56)S(-50.02)LGIK(-52.38)	4	3	0.13369	By MS/MS	By matching	By MS/MS	223820000	0	223820000	0	0.83038	75805000	82528000	65492000	0.87001	0.94103	0.69146
A0A384NL63;P51991;B4E3E6;B4DDB6;B4E036;Q8NFG3;H7C1J8;Q66K53	364;364;309;342;125;49;101;175	A0A384NL63	A0A384NL63	Heterogeneous nuclear ribonucleoprotein A3	HNRNPA3;HNRPA3		0.727353	6.85152	7.63862e-05	57.806	57.151	45.784	0.481164	0	0.0007892	40.197	0.437172	0	7.63862e-05	57.806	0.727353	6.85152	0.000329617	45.784		2	Y	GSFGGRSSGSPYGGGYGSGGGSGGYGSRRF_	X;X;X;X;X;X;B2;X;X;X;X;X;X;X;X;B2;X;X;X;X;X;X;X;X;X;X;X;X;X;X;X	XXXXXXPPPPPPPPPPPPPPPPPPPPPPXXX	S(0.329)S(0.329)GS(0.289)PY(0.289)GGGY(0.727)GS(0.036)GGGSGGYGSR	S(0)S(0)GS(-0.77)PY(-0.77)GGGY(6.85)GS(-13.39)GGGS(-38.99)GGY(-43.17)GS(-43.1)R(-43.06)	10	3	-2.0163			By MS/MS	53646000	0	53646000	0	0.64098	0	0	53646000	0	0	1.738
Q8WVW5;Q53G99;Q1KLZ0;P63261;P60709;B4E335;B4E3A4;Q53GK6;Q53G76;B4DVQ0;B4DW52;A0A2R8Y793;B3KWQ3;Q6PJ43;B7ZAP6;Q96FU6;V9HVZ7;Q96DE1;A4UCT3;A5GZ75;F1BXA6;Q9UE89	294;306;306;306;306;282;287;306;306;264;278;290;184;194;225;96;154;90;100;97;74;45	Q8WVW5	Q8WVW5	Actin, cytoplasmic 2;Actin, cytoplasmic 2, N-terminally processed;Actin, cytoplasmic 1;Actin, cytoplasmic 1, N-terminally processed	PS1TP5BP1;ACTG1;ACTB;HEL-176		0.639487	6.64836	7.99409e-05	67.251	54.674	67.251	0.590915	4.96962	7.99409e-05	52.72	0.639487	6.64836	8.18068e-05	67.251	0.145478	0	0.000113515	64.87		2	Y	KDLYANTVLSGGTTMYPGIADRMQKEITALA	X;X;X;B2;X;X;X;X;X;X;X;X;X;X;X;B2;X;X;X;X;X;X;X;X;X;X;X;X;X;X;X	XPPPPPPPPPPPPPPPPPPPPPXXXXXXXXX	D(0.319)LY(0.674)AN(0.005)T(0.001)VLS(0.001)GGT(0.006)T(0.028)M(0.131)Y(0.639)PGIAD(0.092)R(0.103)	D(-4.07)LY(4.07)AN(-21.37)T(-27.32)VLS(-31.42)GGT(-19.44)T(-13.13)M(-6.65)Y(6.65)PGIAD(-9.76)R(-9.26)	15	3	-2.7255	By MS/MS	By MS/MS		85686000	0	85686000	0	0.02493	47525000	38161000	0	0.04965	0.02936	0
D6R9P3;D6RD18;B4DMY3;D6RBZ0;Q53F64;Q99729	235;235;226;235;235;235	D6R9P3	D6R9P3	Heterogeneous nuclear ribonucleoprotein A/B	HNRNPAB		0.830952	7.73351	0.000748214	51.546	36.906	51.546	0.830952	7.73351	0.000748214	51.546	0.749003	6.02909	0.00142055	47.606	0.743492	6.4709	0.00127377	48.467		2	Y	SGSKCEIKVAQPKEVYQQQQYGSGGRGNRNR	X;X;X;X;X;X;X;X;X;X;X;X;X;X;X;B2;X;X;X;X;B2;X;X;X;X;X;X;X;X;X;X	XXXXXXXXXXXXXPPPPPPPPPPPPPXXXXX	E(0.139)VY(0.831)Q(0.024)Q(0.007)Q(0.01)Q(0.141)Y(0.712)GS(0.056)GGR(0.081)	E(-7.73)VY(7.73)Q(-15.66)Q(-22.06)Q(-19.72)Q(-7.09)Y(7.09)GS(-10.99)GGR(-9.34)	3	3	-0.45698	By MS/MS	By MS/MS	By MS/MS	91956000	0	91956000	0	0.48157	32161000	34470000	25325000	0.66747	0.59219	0.29949
A0A384MEE3;Q9BVA1;A0A024QZU2;O43209;A1L195;Q5JP53;A0A384NYT8;Q5SU16;P07437;B7ZAF0;Q5ST81;Q6LC01;B7ZAK1;B4DMJ5;B2R6L0;A5D907;A5D906;Q8IZ29;P68371;Q8IWP6;Q8N6N5;Q13509;Q9BV28;Q53G92;B2RBD5;A0A0B4J269;Q3ZCR3;G3V2A3;Q13885	106;106;34;3;34;88;105;106;106;77;34;99;34;106;106;99;99;106;106;106;106;106;62;106;106;453;43;34;106	A0A384MEE3;Q5JP53;B2R6L0;Q8IZ29;Q13509;Q13885	Q8IZ29	Tubulin beta-2B chain;Tubulin beta chain;Tubulin beta-4B chain;Tubulin beta-3 chain;Tubulin beta-2A chain	TUBB2B;TUBB;TUBB2A;TUBB2C;TUBB4B;TUBB3		0.988328	19.561	4.45622e-154	288.52	246.33	185.14	0.98695	19.754	9.8132e-93	246.3	0.988328	19.561	4.44685e-122	270.27	0.9874	19.9058	4.45622e-154	288.52		1	Y	IFGQSGAGNNWAKGHYTEGAELVDSVLDVVR;VFGQSGAGNNWAKGHYTEGAELVDSVLDVVR	X;X;X;X;X;X;X;X;X;X;X;X;X;X;X;B2;X;X;X;X;X;X;X;X;X;X;X;X;X;X;X	XXXXXXXXXXXXXPPPPPPPPPPPPPPPPPP	GH(0.011)Y(0.988)TEGAELVDSVLDVVR	GH(-19.56)Y(19.56)T(-35.16)E(-33.55)GAE(-99.16)LVD(-151.05)S(-165.05)VLD(-175.73)VVR(-180.24)	3	3	0.57685	By MS/MS	By MS/MS	By MS/MS	48956000000	48956000000	0	0	2.4239	7243200000	2289000000	5679100000	2.4468	0.36231	0.5201
A0A2R8YEA7;B7Z6P1;A8K3K1;P68133;P68032;D2JYH4;P63267;P62736;B3KW67;B3KUD3;Q13707;B4DUI8;Q562R1;B3KPP5;K4EQ44;K4EP00;K4ENJ5;A0A173GMX0;Q8WVW5;Q53G99;Q1KLZ0;P63261;P60709;B4E335;B4E3A4;Q53GK6;Q53G76;B4DVQ0;B4DW52;A0A2R8Y793;B3KWQ3;Q6PJ43;B7ZAP6;Q96FU6;V9HVZ7;Q96DE1;A4UCT3;A5GZ75;F1BXA6;Q9BYX7;G8FSY7;Q6S8J3;A5A3E0	118;208;242;242;242;242;241;242;241;207;242;197;241;51;81;81;81;36;228;240;240;240;240;216;221;240;240;198;212;224;118;128;159;30;88;24;34;31;8;240;127;940;940	A0A2R8YEA7;B7Z6P1;Q8WVW5;Q6S8J3	Q8WVW5	Actin, alpha skeletal muscle;Actin, alpha cardiac muscle 1;Actin, gamma-enteric smooth muscle;Actin, aortic smooth muscle;Beta-actin-like protein 2;Actin, cytoplasmic 2;Actin, cytoplasmic 2, N-terminally processed;Actin, cytoplasmic 1;Actin, cytoplasmic 1, N-terminally processed;Putative beta-actin-like protein 3;Putative beta-actin-like protein 3, N-terminally processed;POTE ankyrin domain famil…	ACTA1;ACTC1;ACTA2;ACTG2;ACTBL2;PS1TP5BP1;ACTG1;ACTB;HEL-176;POTEKP;POTEE;POTEF		0.5	0	1.70212e-141	287.62	256.44	287.62	0.498383	0	3.27765e-09	108.66	0.5	0	1.70212e-141	287.62	0.499981	0	2.7828e-108	263.44		1	Y	NEMATAASSSSLEKSYELPDGQVITIGNERF;QEMATAASSSSLEKSYELPDGQVITIGNERF	X;X;X;X;X;X;X;X;X;X;X;X;X;X;X;X;X;X;X;X;X;X;X;X;X;X;X;X;X;X;X	XXXXXXXXXXXXXXXXXXXXXXXXXXXXXXX	S(0.5)Y(0.5)ELPDGQVITIGNER	S(0)Y(0)E(-62.43)LPD(-163.5)GQ(-213.99)VIT(-247.84)IGN(-279.22)E(-284.49)R(-287.31)	2	2	-1.5232	By matching	By MS/MS	By MS/MS	7302900000	7302900000	0	0	0.22461	1073600000	1354500000	1833500000	0.060985	0.096213	2.2083
Q5SQT9;Q9NR31;Q8NG23;B2R679;Q5SQT8	89;89;89;89;89	Q5SQT9	Q5SQT9	GTP-binding protein SAR1a	SAR1A		0.5	0	1.88376e-72	205.88	186.24	205.88	0	0		NaN	0.5	0	3.13114e-56	180.03	0.5	0	1.88376e-72	205.88		1	Y	FDLGGHEQARRVWKNYLPAINGIVFLVDCAD	X;X;X;X;X;X;X;X;X;X;X;X;X;X;X;X;X;X;X;X;X;X;X;X;X;X;X;X;X;X;X	XXXXXXXXXXXXXXXXXXXXXXXXXXXXXXX	N(0.5)Y(0.5)LPAINGIVFLVDCADHSR	N(0)Y(0)LPAIN(-82.25)GIVFLVD(-187.87)C(-195.21)AD(-202.77)H(-205.28)S(-205.75)R(-205.87)	2	3	-1.6567	By matching	By MS/MS	By MS/MS	4202400000	4202400000	0	0	11.664	2009300000	1552800000	640280000	12.845	7.617	NaN
Q53F37;Q9Y6B6;D6RD69;Q9H029;D6R9R5;D6RDB2	89;89;89;21;21;89	Q53F37	Q53F37	GTP-binding protein SAR1b	SAR1B;DKFZp434B2017		0.5	0	1.26187e-65	202.07	185	166.21	0.5	0	1.26187e-65	202.07	0.5	0	1.10272e-53	163.45	0.5	0	7.54007e-54	166.21		1	Y	FDLGGHVQARRVWKNYLPAINGIVFLVDCAD	X;X;X;X;X;X;X;X;X;X;X;X;X;X;X;X;X;X;X;X;X;X;X;X;X;X;X;X;X;X;X	XXXXXXXXXXXXXXXXXXXXXXXXXXXXXXX	N(0.5)Y(0.5)LPAINGIVFLVDCADHER	N(0)Y(0)LPAIN(-86.75)GIVFLVD(-145.47)C(-154.96)AD(-161.76)H(-165.65)E(-165.61)R(-166.21)	2	3	-1.0362	By MS/MS	By MS/MS	By MS/MS	2445800000	2445800000	0	0	9.6666	685110000	1270000000	490640000	6.9404	9.8421	19.424
A0A384MEJ3;G8JLB6;P31943;H0YB39	356;356;356;231	A0A384MEJ3	A0A384MEJ3	Heterogeneous nuclear ribonucleoprotein H;Heterogeneous nuclear ribonucleoprotein H, N-terminally processed	HNRNPH1		0.905189	9.79881	2.85349e-65	195.57	182.45	187.39	0.905189	9.79881	8.04292e-60	187.39	0.5	0	2.45592e-46	157.42	0.5	0	2.85349e-65	195.57		1	Y	AVAAMSKDKANMQHRYVELFLNSTAGASGGA	X;X;X;X;X;X;X;X;X;X;X;X;X;X;X;B2;X;X;X;X;X;X;X;X;X;X;X;X;X;X;X	XXXXXXXXXXXXXXXPPPPPPPPPPPPPPPP	Y(0.905)VE(0.095)LFLNSTAGASGGAYEHR	Y(9.8)VE(-9.8)LFLN(-94.71)S(-107.51)T(-121.59)AGAS(-151.19)GGAY(-174.11)E(-179.92)H(-184.23)R(-185.63)	1	3	-0.28969	By MS/MS	By MS/MS	By MS/MS	885700000	885700000	0	0	1.3843	232840000	323960000	328900000	0.89683	0.8846	23.515
F5H5D3;Q9BQE3;Q53GA7;B7Z1K5;F8VVB9;P68363;A8JZY9;B3KPS3;B3KT06;B4DDU2;C9JDS9;P68366;Q71U36;B4DQK4;Q1ZYQ1;P0DPH8;P0DPH7;Q6PEY2;Q9UQM3	332;262;262;332;222;262;262;227;227;109;109;262;262;196;262;262;262;262;139	F5H5D3;P68363;P68366;Q71U36;Q9UQM3	F5H5D3	Tubulin alpha-1C chain;Tubulin alpha-1B chain;Tubulin alpha-4A chain;Tubulin alpha-1A chain;Tubulin alpha-3E chain	TUBA1C;TUBA1B;TUBA4A;TUBA1A;TUBA2;TUBA3E		0.989713	19.8329	7.80455e-60	188.13	158.79	142.85	0.964938	14.4014	1.43267e-36	145.71	0.989713	19.8329	3.95964e-36	142.85	0.98123	17.1831	7.80455e-60	188.13		1	Y	ALNVDLTEFQTNLVPYPRIHFPLATYAPVIS	X;X;X;X;X;X;X;X;X;X;X;X;X;X;X;B2;X;X;X;B2;X;X;X;X;B2;B2;X;X;X;X;X	PPPPPPPPPPPPPPPPPPXXXXXXXXXXXXX	FDGALNVDLTEFQTNLVPY(0.99)PR(0.01)	FD(-136.96)GALN(-124.02)VD(-117.73)LT(-108.53)E(-103.69)FQ(-85.52)T(-78.18)N(-59.35)LVPY(19.83)PR(-19.83)	19	2	-2.2302	By MS/MS	By MS/MS	By MS/MS	6529600000	6529600000	0	0	0.75987	997430000	1002900000	1185200000	0.40373	0.25805	0.53008
F5H5D3;Q9BQE3;Q53GA7;B7Z1K5;F8VVB9;P68363;A8JZY9;B3KPS3;B3KT06;B4DDU2;C9JDS9;P68366;Q71U36;B4DQK4;Q1ZYQ1;P0DPH8;P0DPH7;Q6PEY2;F8VQQ4;Q9UQM3	294;224;224;294;184;224;224;189;189;71;71;224;224;158;224;224;224;224;189;101	F5H5D3;P68363;P68366;Q71U36;Q9UQM3	F5H5D3	Tubulin alpha-1C chain;Tubulin alpha-1B chain;Tubulin alpha-4A chain;Tubulin alpha-1A chain;Tubulin alpha-3E chain	TUBA1C;TUBA1B;TUBA4A;TUBA1A;TUBA2;TUBA3E		0.952869	13.102	2.68174e-59	234.65	200.76	234.65	0.724287	7.2236	2.9575e-25	177.63	0.758276	5.404	1.11091e-27	188.96	0.952869	13.102	2.68174e-59	234.65		1	Y	IYDICRRNLDIERPTYTNLNRLIGQIVSSIT;IYDICRRNLDIERPTYTNLNRLISQIVSSIT	X;X;X;X;X;X;X;X;X;X;X;X;X;X;X;B2;X;X;X;X;X;X;X;B2;X;X;X;B2;X;X;X	XXXXXXPPPPPPPPPPPPPPPXXXXXXXXXX	NLDIERPT(0.047)Y(0.953)TNLNR	N(-179.3)LD(-135.08)IE(-72.39)R(-45.69)PT(-13.1)Y(13.1)T(-33.19)N(-62.73)LN(-81.95)R(-91.41)	9	2	-0.66682	By MS/MS	By MS/MS	By MS/MS	2711100000	2711100000	0	0	0.7892	623860000	777530000	922690000	0.63199	0.6457	0.74176
C9J9K3;A0A024R2L6;A0A0C4DG17;P08865;A0A024R7P5	139;139;144;139;139	C9J9K3	C9J9K3	40S ribosomal protein SA	RPSA;LOC388524		0.831707	7.47462	5.99779e-58	153.52	137.65	143.05	0.662015	5.58281	1.94246e-18	106.62	0.831707	7.47462	1.37875e-45	143.05	0.77947	5.61056	5.99779e-58	153.52		1	Y	VTDPRADHQPLTEASYVNLPTIALCNTDSPL	X;X;X;X;X;X;X;X;X;X;X;X;X;X;X;B2;X;X;X;X;X;X;X;X;X;X;X;X;X;X;X	XXXXXPPPPPPPPPPPPPPPPPPPPPPPPPP	ADHQPLTEAS(0.019)Y(0.832)VN(0.149)LPTIALCNTDSPLR	AD(-67.15)H(-67.15)Q(-51.94)PLT(-39.42)E(-32.37)AS(-16.46)Y(7.47)VN(-7.47)LPT(-38.02)IALC(-80.45)N(-93.43)T(-105.41)D(-109.86)S(-113.88)PLR(-119.16)	11	3	1.9864	By MS/MS	By MS/MS	By MS/MS	458550000	458550000	0	0	1.2432	149890000	174130000	134530000	1.8307	1.2112	0.93938
E9KL35;P63244;J3KPE3;D6RAC2;H0YAF8;H0Y8W2;D6REE5;H0YAM7;D6RF23;H0Y8R5;D6R9Z1;D6R9L0	228;228;184;180;109;159;246;135;12;86;214;276	E9KL35	E9KL35	Guanine nucleotide-binding protein subunit beta-2-like 1;Guanine nucleotide-binding protein subunit beta-2-like 1, N-terminally processed	GNB2L1		0.915407	10.796	2.94238e-56	178.88	163.13	178.88	0.883726	9.59037	2.72713e-36	144.68	0.915407	10.796	2.94238e-56	178.88	0.823451	9.36275	4.78307e-46	153.86		1	Y	DGQAMLWDLNEGKHLYTLDGGDIINALCFSP	X;X;X;X;X;X;X;X;X;X;X;X;X;X;X;B2;X;X;X;X;X;X;X;X;X;X;X;X;X;X;X	XXXXXXXXXXXXXPPPPPPPPPPPPPPPPPP	H(0.007)LY(0.915)T(0.076)LD(0.002)GGDIINALCFSPNR	H(-21.37)LY(10.8)T(-10.8)LD(-27.31)GGD(-50.62)IIN(-107.32)ALC(-146.7)FS(-165.65)PN(-173.35)R(-174.7)	3	3	0.39049	By MS/MS	By MS/MS	By MS/MS	587230000	587230000	0	0	0.21349	69233000	409410000	54723000	0.14422	0.30016	0.060359
Q53SS8;Q15365	341;341	Q53SS8	Q53SS8	Poly(rC)-binding protein 1	PCBP1		0.987425	19.5422	4.1908e-54	164.59	133.16	164.59	0.981764	17.9776	1.87365e-46	156.73	0.987425	19.5422	4.1908e-54	164.59	0.822033	6.83325	2.5982e-07	91.414		1	Y	QVTITGSAASISLAQYLINARLSSEKGMGCS	X;X;X;X;X;X;X;X;X;X;X;X;X;X;X;B2;X;X;X;X;X;X;X;X;X;X;X;X;X;X;X	PPPPPPPPPPPPPPPPPPPPPXXXXXXXXXX	QVTITGSAASISLAQ(0.011)Y(0.987)LIN(0.001)AR	Q(-150.72)VT(-143.39)IT(-132.43)GS(-132.43)AAS(-101.01)IS(-71.32)LAQ(-19.54)Y(19.54)LIN(-28.55)AR(-36.45)	16	3	-1.2863	By MS/MS	By MS/MS	By MS/MS	2689500000	2689500000	0	0	11.426	720720000	904040000	434510000	24.755	8.3615	4.4273
Q96AF9;B4DQR8;Q28617;H0Y2Y8;Q9BUS0;Q15942;B4DY85;H7C3D3	210;229;237;284;325;316;260;133	Q96AF9	Q96AF9	Zyxin	ZYX		0.850344	8.82795	4.08066e-53	151.82	128.59	151.82	0.780033	7.31974	1.29764e-16	108.08	0.850344	8.82795	4.08066e-53	151.82	0.557786	1.47421	7.78686e-43	139.69		1	Y	ALSAGTGSPQPPSFTYAQQREKPRVQEKQHP	X;X;X;X;X;X;X;X;X;X;X;X;X;X;X;B2;X;X;X;X;X;X;X;X;X;X;X;X;X;X;X	PPPPPPPPPPPPPPPPPPPPXXXXXXXXXXX	LGHPEALSAGTGSPQPPS(0.002)FT(0.111)Y(0.85)AQ(0.015)Q(0.019)R(0.003)	LGH(-149.13)PE(-145.65)ALS(-134.02)AGT(-108.64)GS(-95.57)PQ(-80.9)PPS(-26.09)FT(-8.83)Y(8.83)AQ(-17.53)Q(-16.6)R(-25.2)	21	3	-0.85572	By MS/MS	By MS/MS	By MS/MS	298990000	298990000	0	0	NaN	58710000	123560000	108370000	NaN	NaN	NaN
P22626;A0A384NL58;A0A024RA28	336;336;284	P22626	P22626	Heterogeneous nuclear ribonucleoproteins A2/B1	HNRNPA2B1;HNRPA2B1		0.73793	5.26279	6.71373e-53	152.11	139.53	152.11					0.73793	5.26279	6.71373e-53	152.11	0.303119	0	8.14105e-24	124.16		1	Y	FGGSRNMGGPYGGGNYGPGGSGGSGGYGGRS	X;X;X;X;X;X;X;X;X;X;X;X;X;X;X;B2;X;X;X;X;X;X;X;X;X;X;X;X;X;X;X	XXXXXPPPPPPPPPPPPPPPPPPPPPPPPPX	NMGGPY(0.042)GGGN(0.22)Y(0.738)GPGGSGGSGGYGGR	N(-33.59)M(-33.59)GGPY(-12.47)GGGN(-5.26)Y(5.26)GPGGS(-70.98)GGS(-100.1)GGY(-126.79)GGR(-141.94)	11	2	-0.41779		By MS/MS		344990000	344990000	0	0	1.8953	0	344990000	0	0	5.0059	0
A0A024R3Q0;P84077;A0A024R0Y6;P61204;B4DEB9;B4DJC8;B4DN70;F5H423;F5H0C7;A4D0Z3;P84085;B4DLJ3;C9J1Z8;P18085;C9JAK5;C9JPM4	81;81;81;81;82;81;81;81;81;81;81;81;81;81;54;81	A0A024R3Q0;A4D0Z3;P18085	P18085	ADP-ribosylation factor 1;ADP-ribosylation factor 3;ADP-ribosylation factor 5;ADP-ribosylation factor 4	ARF1;ARF3;ARF5;ARF4		0.499995	0	1.85362e-46	186.94	159.83	180.88	0.499731	0	2.08126e-22	134.13	0.499703	0	1.85362e-46	186.94	0.499995	0	2.50411e-43	180.88		1	Y	WDVGGQDKIRPLWRHYFQNTQGLIFVVDSND;WDVGGQDRIRPLWKHYFQNTQGLIFVVDSND	X;X;X;X;X;X;X;X;X;X;X;X;X;X;X;X;X;X;X;X;X;X;X;X;X;X;X;X;X;X;X	XXXXXXXXXXXXXXXXXXXXXXXXXXXXXXX	H(0.5)Y(0.5)FQNTQGLIFVVDSNDR	H(0)Y(0)FQ(-46.95)N(-62.16)T(-68.06)Q(-81.83)GLIFVVD(-158.05)S(-171.61)N(-174.76)D(-176.26)R(-179.31)	2	3	-1.423			By MS/MS	525310000	525310000	0	0	0.75986	0	0	525310000	0	0	3.4799
A0A024RAZ7;P09651;F8W6I7;A0A024RB53;Q6IPF2;Q9BSM5;B4E0B5;H0YH80;A0A2R8Y4L2;Q3MI39	366;366;301;314;314;292;248;185;269;161	A0A024RAZ7	A0A024RAZ7	Heterogeneous nuclear ribonucleoprotein A1;Heterogeneous nuclear ribonucleoprotein A1, N-terminally processed	HNRPA1;HNRNPA1		0.89827	10.3461	1.03398e-43	177.64	163.71	177.64	0.89827	10.3461	1.03398e-43	177.64	0.72379	10.3213	1.46192e-41	164.13						1	Y	PRNQGGYGGSSSSSSYGSGRRF_________	X;X;X;X;X;X;X;X;X;X;X;X;X;X;X;B2;X;X;X;X;X;X;X;X;X;X;X;X;X;X;X	XXPPPPPPPPPPPPPPPPPPXXXXXXXXXXX	NQGGYGGSSSS(0.001)S(0.008)S(0.083)Y(0.898)GS(0.009)GR(0.001)	N(-116.48)Q(-116.48)GGY(-69.72)GGS(-56.09)S(-36.27)S(-39.77)S(-30.23)S(-20.42)S(-10.35)Y(10.35)GS(-20.18)GR(-30.25)	14	2	-0.42697	By MS/MS	By MS/MS		1142400000	1142400000	0	0	5.3375	581030000	561400000	0	10.886	6.6459	0
K7EMU7;B3KUM4;Q13526	23;23;23	K7EMU7	K7EMU7	Peptidyl-prolyl cis-trans isomerase NIMA-interacting 1	PIN1		0.993929	22.4478	2.79643e-43	146.76	137.59	146.76	0.976329	16.165	1.20863e-16	109.41	0.983106	17.6556	2.21614e-11	106.42	0.993929	22.4478	2.79643e-43	146.76		1	Y	PPGWEKRMSRSSGRVYYFNHITNASQWERPS	X;X;X;X;X;X;X;X;X;X;X;X;X;X;X;B2;X;X;X;X;X;X;X;X;X;X;X;X;X;X;X	XXXXXXXXXXXXXXPPPPPPPPPPPPPPPPP	VY(0.994)Y(0.006)FNHITNASQWERPSGNSSSGGK	VY(22.45)Y(-22.45)FN(-33.88)H(-51.64)IT(-67.52)N(-75.22)AS(-97.89)Q(-107.13)W(-115.16)E(-122.66)R(-129.54)PS(-128.96)GN(-128.96)S(-135.23)S(-135.02)S(-140.39)GGK(-144.45)	2	4	-1.0171	By MS/MS	By MS/MS	By MS/MS	1761300000	1761300000	0	0	NaN	428300000	498430000	483260000	NaN	NaN	NaN
B5MDF5;J3KQE5;P62826;F5H018;H0YFC6;Q96QB7;Q0EFC9	39;57;39;35;54;39;39	B5MDF5	B5MDF5	GTP-binding nuclear protein Ran	RAN;TC4		0.999973	45.6591	2.78489e-41	161.19	126.92	139.67	0.999901	40.0576	9.20383e-23	129.32	0.999973	45.6591	9.98586e-31	139.67	0.99996	44.0137	2.78489e-41	161.19		1	Y	TTFVKRHLTGEFEKKYVATLGVEVHPLVFHT	X;X;X;X;X;X;X;X;X;X;X;X;X;X;X;B2;X;X;X;X;X;X;X;X;X;X;X;X;X;X;X	XXXXXXXXXXXXXXXPPPPPPPPPPPPPPPP	Y(1)VATLGVEVHPLVFHTNR	Y(45.66)VAT(-45.66)LGVE(-96.46)VH(-117.36)PLVFH(-138.96)T(-139.61)N(-139.61)R(-139.44)	1	4	1.0209	By MS/MS	By MS/MS	By MS/MS	8464300000	8464300000	0	0	1.9494	773400000	976860000	12401000	0.46785	0.54715	0.013725
Q9BWF3;E9PB51;A8K9U0	304;194;304	Q9BWF3	Q9BWF3	RNA-binding protein 4	RBM4		0.903753	12.5917	8.466e-40	138.12	119.55	138.12	0.650081	5.80478	1.33898e-39	137.42	0.903753	12.5917	8.466e-40	138.12						1	Y	AAAAAAAVTAASTSYYGRDRSPLRRATAPVP	X;X;X;X;X;X;X;X;X;X;X;X;X;X;X;B2;X;X;X;X;X;X;X;X;X;X;X;X;X;X;X	PPPPPPPPPPPPPPPPPPXXXXXXXXXXXXX	HLLPTSGAAATAAAAAAAAAAVTAAST(0.001)S(0.002)Y(0.044)Y(0.904)GR(0.05)	H(-138.04)LLPT(-136.43)S(-136.43)GAAAT(-123.45)AAAAAAAAAAVT(-43.4)AAS(-36.7)T(-31.68)S(-26.63)Y(-13.16)Y(12.59)GR(-12.59)	30	3	-0.029614	By MS/MS	By MS/MS		58829000	58829000	0	0	0.73276	31496000	27333000	0	1.745	0.9097	0
O14980;C9JKM9;C9J673;C9IZS4;C9JQ02;C9JV99;C9JF49;C9IYM2;F8WF71	36;36;36;36;36;36;36;36;36	O14980	O14980	Exportin-1	XPO1		0.981304	18.8543	1.03206e-36	143.33	130.77	109.05	0.692329	8.30414	0.000200376	51.503	0.981304	18.8543	5.02145e-16	109.05	0.978006	18.6044	1.03206e-36	143.33		1	Y	QKLDINLLDNVVNCLYHGEGAQQRMAQEVLT	X;X;X;X;X;X;X;X;X;X;X;X;X;X;X;B2;X;X;X;X;X;X;X;X;X;X;X;X;X;X;X	XXPPPPPPPPPPPPPPPPPPPPPPXXXXXXX	LDINLLDNVVN(0.001)C(0.005)LY(0.981)H(0.013)GEGAQQR	LD(-93.92)IN(-82.66)LLD(-61.89)N(-56.96)VVN(-30.07)C(-23.12)LY(18.85)H(-18.85)GE(-40.5)GAQ(-46.44)Q(-45.88)R(-45.32)	14	3	-0.061226	By MS/MS	By MS/MS	By MS/MS	587890000	587890000	0	0	3.6019	192700000	178050000	200260000	6.1101	2.1291	4.1678
O15173	143	O15173	O15173	Membrane-associated progesterone receptor component 2	PGRMC2		1	77.7072	3.39241e-33	158.76	140.08	145.72	1	85.27	2.91159e-22	143.7	1	79.4531	3.0507e-22	145.72	1	77.7072	3.39241e-33	158.76		1	Y	FDVTKGSKFYGPAGPYGIFAGRDASRGLATF	X;X;X;X;X;X;X;X;X;X;X;X;X;X;X;B2;X;X;X;X;X;X;X;X;X;X;X;X;X;X;X	XXXXXXXXPPPPPPPPPPPPPPXXXXXXXXX	FYGPAGPY(1)GIFAGR	FY(-83.94)GPAGPY(77.71)GIFAGR(-77.71)	8	2	2.9562	By MS/MS	By MS/MS	By MS/MS	3911700000	3911700000	0	0	59.631	318710000	332510000	250890000	17.383	14.033	10.644
A0A0S2Z4R1;P54577;A0A0C4DGZ5	166;166;166	A0A0S2Z4R1	A0A0S2Z4R1	Tyrosine--tRNA ligase, cytoplasmic;Tyrosine--tRNA ligase, cytoplasmic, N-terminally processed;Tyrosine--tRNA ligase	YARS		0.999955	43.8672	1.33166e-32	134.09	115.36	133.96	0.995538	23.8196	2.34408e-16	107.85	0.999955	43.8672	1.36463e-32	133.96	0.999643	34.6735	1.33166e-32	134.09		1	Y	EVVKQVEHPLLSGLLYPGLQALDEEYLKVDA	X;X;X;X;X;X;X;X;X;X;X;X;X;X;X;B2;X;X;X;X;X;X;X;X;X;X;X;X;X;X;X	XXXXPPPPPPPPPPPPPPPPPPPPPPPPXXX	QVEHPLLSGLLY(1)PGLQALDEEYLK	Q(-114.16)VE(-114.57)H(-108.46)PLLS(-61.77)GLLY(43.87)PGLQ(-43.87)ALD(-55.95)E(-65.73)E(-69.56)Y(-74.21)LK(-83.17)	12	3	0.14544	By MS/MS	By MS/MS	By MS/MS	498090000	498090000	0	0	0.52589	147810000	134720000	215570000	0.54156	0.28307	1.0871
Q14257;A8MXP8	303;202	Q14257	Q14257	Reticulocalbin-2	RCN2		0.917861	13.0188	1.99665e-32	133.92	120.46	133.92					0.917861	13.0188	1.99665e-32	133.92						1	Y	ILENPDLFLTSEATDYGRQLHDDYFYHDEL_	X;X;X;X;X;X;X;X;X;X;X;X;X;X;X;B2;X;X;X;X;X;X;X;X;X;X;X;X;X;X;X	PPPPPPPPPPPPPPPPPPXXXXXXXXXXXXX	LSEEEILENPDLFLTSEAT(0.002)D(0.034)Y(0.918)GR(0.046)	LS(-133.58)E(-132.87)E(-132.04)E(-129.3)ILE(-113.06)N(-105.31)PD(-97.23)LFLT(-70.87)S(-60.57)E(-56.25)AT(-26.83)D(-14.26)Y(13.02)GR(-13.02)	21	3	-0.26391		By MS/MS		178440000	178440000	0	0	0.22793	0	178440000	0	0	1.1971	0
E9PGZ1;E7EX44;Q6PJM5;Q6P707;Q05DR4	21;21;21;21;21	E9PGZ1	E9PGZ1		CALD1		0.919258	10.9076	2.88685e-32	211.45	118.07	211.45	0.821392	7.66562	0.000143671	83.081	0.489014	2.30946	0.00020441	74.962	0.919258	10.9076	2.88685e-32	211.45		1	Y	GSHGRRSLAALSQIAYQRNDDDEEEAARERR	X;X;X;X;X;X;X;X;X;X;X;X;X;X;X;B2;X;X;X;X;X;X;X;X;X;X;X;X;X;X;X	XXXXXXPPPPPPPPPPPPXXXXXXXXXXXXX	SLAALSQIAY(0.919)Q(0.075)R(0.006)	S(-206.75)LAALS(-115.94)Q(-73.05)IAY(10.91)Q(-10.91)R(-21.74)	10	2	-1.3239	By MS/MS		By MS/MS	108140000	108140000	0	0	NaN	15326000	0	0	NaN	NaN	NaN
P04350;B4DE77;B4DJ43;M0R278;M0R1I1;Q9BUF5;K7ESM5;B3KS31;K7EL29;K7ES63	106;71;106;151;34;106;69;34;106;34	P04350;Q9BUF5	P04350	Tubulin beta-4A chain;Tubulin beta-6 chain	TUBB4A;TUBB6		0.942491	13.9732	3.34152e-31	141.85	118.3	141.85	0.942491	13.9732	3.34152e-31	141.85	0.456762	0	9.90013e-09	98.796	0.925623	12.821	1.61144e-17	125.96		1	Y	IFGQTGAGNNWAKGHYTEGAELVDAVLDVVR;VFGQSGAGNNWAKGHYTEGAELVDAVLDVVR	X;X;X;X;X;X;X;X;X;X;X;X;X;X;X;B2;X;X;X;X;X;X;X;X;X;X;X;X;X;X;X	XXXXXXXXXXXXXPPPPPPPPPPPPPPPPPP	GH(0.019)Y(0.942)T(0.038)EGAELVDAVLDVVR	GH(-16.87)Y(13.97)T(-13.97)E(-34.23)GAE(-58.44)LVD(-108.54)AVLD(-127.16)VVR(-138.3)	3	3	-1.097	By MS/MS		By MS/MS	473420000	473420000	0	0	0.57623	179440000	0	293980000	0.84261	0	0.63153
P06493;A0A024QZP7;Q5H9N4;A0A087WZZ9;I6L9I5;E5RIU6	110;110;116;110;110;110	P06493	P06493	Cyclin-dependent kinase 1	CDK1;CDC2;DKFZp686L20222		0.880658	11.8422	3.52381e-31	156.57	128.41	156.57	0.880658	11.8422	3.52381e-31	156.57	0.860161	10.7708	3.67962e-06	79.347						1	Y	PPGQYMDSSLVKSYLYQILQGIVFCHSRRVL	X;X;X;X;X;X;X;X;X;X;X;X;X;X;X;B2;X;X;X;X;X;X;X;X;X;X;X;X;X;X;X	XXXXXXXXXXXXPPPPPPPPPPPPPPPPXXX	S(0.058)Y(0.058)LY(0.881)Q(0.004)ILQGIVFCHSR	S(-11.84)Y(-11.84)LY(11.84)Q(-23.32)ILQ(-98.78)GIVFC(-143.86)H(-146.47)S(-146.1)R(-145.91)	4	3	2.8637	By MS/MS	By MS/MS		299860000	299860000	0	0	0.12097	34657000	265210000	0	0.051336	0.32206	0
A0A0J9YYL3;A0A0J9YXJ8;A0A0J9YVP6;A0A0J9YXX5;Q9UHX1;A0A0J9YVR6;E9PQ56;A0A0J9YWM1;H0YEM1;E9PN18;E9PMU7;E9PL19	78;95;107;124;132;106;114;123;130;152;152;169	A0A0J9YYL3	A0A0J9YYL3	Poly(U)-binding-splicing factor PUF60	PUF60		1	73.802	4.64516e-31	161.99	131.42	161.99	0.999984	48.418	2.92584e-14	125.54	1	73.802	4.64516e-31	161.99	0.999941	42.2626	9.86973e-15	126.77		1	Y	MAAQRQRALAIMCRVYVGSIYYELGEDTIRQ	X;X;X;X;X;X;X;X;X;X;X;X;X;X;X;B2;X;X;X;X;X;X;X;X;X;X;X;X;X;X;X	XXXXXXXXXXXXXXPPPPPPPPPPPPPPPPX	VY(1)VGSIYYELGEDTIR	VY(73.8)VGS(-73.8)IY(-109.3)Y(-116.91)E(-130.35)LGE(-143.36)D(-151.08)T(-155.96)IR(-161.99)	2	2	0.32692	By MS/MS	By MS/MS	By MS/MS	979520000	979520000	0	0	NaN	125360000	156500000	264570000	NaN	NaN	NaN
P02786;A8K6Q8;F8WBE5	20;20;20	P02786	P02786	Transferrin receptor protein 1;Transferrin receptor protein 1, serum form	TFRC		0.678427	6.52519	5.11869e-31	160.67	136.17	160.67	0.561074	1.83127	6.74591e-31	152.96	0.678427	6.52519	5.11869e-31	160.67						1	Y	ARSAFSNLFGGEPLSYTRFSLARQVDGDNSH	X;X;X;X;X;X;X;X;X;X;X;X;X;X;X;B2;X;X;X;X;X;X;X;X;X;X;X;X;X;X;X	XXPPPPPPPPPPPPPPPPXXXXXXXXXXXXX	SAFSNLFGGEPLS(0.151)Y(0.678)T(0.151)R(0.02)	S(-158.43)AFS(-154.98)N(-148.66)LFGGE(-68.06)PLS(-6.53)Y(6.53)T(-6.53)R(-15.4)	14	2	-1.2089	By MS/MS	By MS/MS		259150000	259150000	0	0	NaN	114150000	77943000	0	NaN	NaN	NaN
A6NLN1;A0A0U1RRM4;P26599;Q59H49;K7EK45;A0A087WU68	217;278;247;264;72;119	A6NLN1	A6NLN1	Polypyrimidine tract-binding protein 1	PTBP1		0.977257	18.0271	7.13851e-31	151.1	128.36	151.1	0	0		NaN	0.961945	16.9321	9.17731e-07	97.911	0.977257	18.0271	7.13851e-31	151.1		1	Y	VSAQHAKLSLDGQNIYNACCTLRIDFSKLTS	X;X;X;X;X;X;X;X;X;X;X;X;X;X;X;B2;X;X;X;X;X;X;X;X;X;X;X;X;X;X;X	XXXXXXXPPPPPPPPPPPPPPPPXXXXXXXX	LSLDGQN(0.015)IY(0.977)N(0.007)ACCTLR	LS(-70.12)LD(-49.17)GQ(-47.75)N(-18.03)IY(18.03)N(-21.26)AC(-50.54)C(-70.12)T(-78.44)LR(-96.63)	9	2	0.72204	By matching	By MS/MS	By MS/MS	1779200000	1779200000	0	0	3.896	250330000	342160000	790910000	1.3049	1.9027	9.3047
A0A384MDR8;P11177;C9J634;F8WF02;Q59G68	131;131;113;131;51	A0A384MDR8	A0A384MDR8	Pyruvate dehydrogenase E1 component subunit beta, mitochondrial	PDHB		0.499966	0	4.51142e-30	161.67	120.72	160.18	0.498896	0	9.52366e-14	127.42	0.499962	0	4.51142e-30	161.67	0.499966	0	4.91894e-30	160.18		1	Y	SMQAIDQVINSAAKTYYMSGGLQPVPIVFRG	X;X;X;X;X;X;X;X;X;X;X;X;X;X;X;X;X;X;X;X;X;X;X;X;X;X;X;X;X;X;X	XXXXXXXXXXXXXXXXXXXXXXXXXXXXXXX	T(0.5)Y(0.5)YMSGGLQPVPIVFR	T(0)Y(0)Y(-38.82)M(-53.78)S(-65.89)GGLQ(-116.89)PVPIVFR(-160.18)	2	2	-1.3537		By MS/MS	By MS/MS	77670000	77670000	0	0	0.66963	0	45126000	32544000	0	1.2886	0.84739
J3QRG6;K7PML8;P42771;D1LYX3;Q2MJK0;Q208B5;R9S252	44;44;44;44;44;44;44	J3QRG6	J3QRG6	Cyclin-dependent kinase inhibitor 2A	CDKN2A;p16ink4a		0.577938	2.46299	5.35841e-30	150.09	130.45	150.09	0.577938	2.46299	5.35841e-30	150.09										1	Y	RALLEAGALPNAPNSYGRRPIQVMMMGSARV	X;X;X;X;X;X;X;X;X;X;X;X;X;X;X;B2;X;X;X;X;X;X;X;X;X;X;X;X;X;X;X	XPPPPPPPPPPPPPPPPPXXXXXXXXXXXXX	ALLEAGALPNAPNS(0.094)Y(0.578)GR(0.328)	ALLE(-144.67)AGALPN(-84.39)APN(-31.32)S(-7.89)Y(2.46)GR(-2.46)	15	2	-0.19122	By MS/MS			80214000	80214000	0	0	3.3727	80214000	0	0	14.316	0	0
A8K6H9;A0A024R0W3;Q96QD8;F8VUY8	41;41;41;41	A8K6H9	A8K6H9	Sodium-coupled neutral amino acid transporter 2	SLC38A2		0.788254	9.0056	1.19173e-29	138.3	128.77	90.972	0.788254	9.0056	1.19173e-29	138.3	0.710556	9.00159	3.81535e-05	75.533	0.778129	8.96056	3.27025e-07	90.316		1	Y	FNYSYPTKQAALKSHYADVDPENQNFLLESN	X;X;X;X;X;X;X;X;X;X;X;X;X;X;X;B2;X;X;X;X;X;X;X;X;X;X;X;X;X;X;X	XXXXXXXXXXXXXPPPPPPPPPPPPPPPPPP	S(0.099)H(0.099)Y(0.788)AD(0.013)VDPENQNFLLESNLGK	S(-9.01)H(-9.01)Y(9.01)AD(-17.76)VD(-34.44)PE(-42.32)N(-56.63)Q(-56.63)N(-55.94)FLLE(-73.82)S(-79.02)N(-83.64)LGK(-88.05)	3	3	-2.7749	By MS/MS	By MS/MS	By MS/MS	763660000	763660000	0	0	0.95856	139050000	196650000	288630000	1.2381	0.66001	0.74696
Q6PKC2;Q86Y74;A8K3C5;J3KPP4;O95232;D6RDI2;H7C5U7;C9JL41	37;37;37;37;37;86;14;37	Q6PKC2	Q6PKC2	Luc7-like protein 3	CROP;LUC7L3		0.499999	0	1.17429e-28	149.23	124.5	149.23	0.499894	0	2.73147e-06	75.479	0.499999	0	1.17429e-28	149.23	0.499894	0	5.97248e-14	122.55		1	Y	EKRSNVRWDHESVCKYYLCGFCPAELFTNTR	X;X;X;X;X;X;X;X;X;X;X;X;X;X;X;B2;X;X;X;X;X;X;X;X;X;X;X;X;X;X;X	XXXXXXXXXXXXXXXPPPPPPPPPPPPPPPP	Y(0.5)Y(0.5)LCGFCPAELFTNTR	Y(0)Y(0)LC(-55.6)GFC(-84.31)PAE(-118.09)LFT(-142.3)N(-146.1)T(-145.9)R(-149.23)	1	2	-3.1289		By MS/MS		122600000	122600000	0	0	4.0213	0	82997000	0	0	5.0992	NaN
Q6PKC2;Q86Y74;A8K3C5;J3KPP4;O95232;D6RDI2;H7C5U7;C9JL41	38;38;38;38;38;87;15;38	Q6PKC2	Q6PKC2	Luc7-like protein 3	CROP;LUC7L3		0.499999	0	1.17429e-28	149.23	124.5	149.23	0.499894	0	2.73147e-06	75.479	0.499999	0	1.17429e-28	149.23	0.499894	0	5.97248e-14	122.55		1	Y	KRSNVRWDHESVCKYYLCGFCPAELFTNTRS	X;X;X;X;X;X;X;X;X;X;X;X;X;X;X;X;X;X;X;X;X;X;X;X;X;X;X;X;X;X;X	XXXXXXXXXXXXXXXXXXXXXXXXXXXXXXX	Y(0.5)Y(0.5)LCGFCPAELFTNTR	Y(0)Y(0)LC(-55.6)GFC(-84.31)PAE(-118.09)LFT(-142.3)N(-146.1)T(-145.9)R(-149.23)	2	2	-3.1289		By MS/MS		122600000	122600000	0	0	4.0213	0	82997000	0	0	5.0992	NaN
V9HWE9;P09211;A8MX94;A0A087X2E9	64;64;64;52	V9HWE9	V9HWE9	Glutathione S-transferase P	HEL-S-22;GSTP1		0.995284	24.9188	1.51837e-28	148.92	124.83	147.24	0.928944	11.4386	1.56364e-09	110.98	0.995284	24.9188	3.41418e-28	147.24	0.992994	22.3297	1.51837e-28	148.92		1	Y	LYGQLPKFQDGDLTLYQSNTILRHLGRTLGL	X;B2;X;X;X;X;X;X;X;X;X;X;X;X;X;B2;X;X;X;X;X;X;X;X;X;X;X;X;X;X;X	XXXXXXXPPPPPPPPPPPPPPPPXXXXXXXX	FQDGDLT(0.003)LY(0.995)Q(0.001)SNTILR	FQ(-61.23)D(-42.42)GD(-55.93)LT(-24.92)LY(24.92)Q(-28.38)S(-55.05)N(-70.92)T(-77.38)ILR(-106.77)	9	2	-0.67094	By MS/MS	By MS/MS	By MS/MS	2478900000	2478900000	0	0	2.147	73367000	311920000	594290000	0.15392	0.78871	2.1042
V9HWB8;P14618;B4DNK4;Q8WUW7;Q9UKK4;Q9NYI7;Q9UN47	390;390;316;202;10;10;10	V9HWB8	V9HWB8	Pyruvate kinase;Pyruvate kinase PKM	HEL-S-30;PKM;PKM2		0.991367	21.0367	1.81586e-28	139.65	102.7	129.93	0.983664	17.8402	9.0651e-21	132.08	0.988519	21.3115	1.81586e-28	139.65	0.991367	21.0367	1.17525e-20	129.93		1	Y	VRMQHLIAREAEAAIYHLQLFEELRRLAPIT	X;X;X;X;X;X;X;X;X;X;X;X;X;X;X;B2;X;X;X;X;X;X;X;X;X;X;X;X;X;X;X	XXXXXXXXXPPPPPPPPPPPPPPPPPXXXXX	EAE(0.001)AAIY(0.991)H(0.008)LQLFEELRR	E(-41.2)AE(-31.24)AAIY(21.04)H(-21.04)LQ(-54.61)LFE(-81.53)E(-81.75)LR(-93.29)R(-100.97)	7	4	1.66	By MS/MS	By MS/MS	By MS/MS	3627100000	3627100000	0	0	1.0012	871320000	887760000	880640000	1.0068	0.48352	0.95565
V9HW65;A0A024R5Z7;P07355;H0YN42;H0YM50;A6NMY6;B3KRQ1;H0YN28;H0YL33	238;238;238;238;207;238;121;121;121	V9HW65	V9HW65	Annexin;Annexin A2;Putative annexin A2-like protein	HEL-S-270;ANXA2;ANXA2P2		0.919287	10.9603	1.90099e-28	144.79	110.72	144.79	0.919287	10.9603	1.90099e-28	144.79	0.708316	4.44593	7.21557e-14	132.39	0.740206	6.39914	5.40094e-13	130.53		1	Y	PHLQKVFDRYKSYSPYDMLESIRKEVKGDLE	X;X;X;X;X;X;X;X;X;X;X;X;X;X;X;B2;X;X;X;X;X;X;X;X;X;X;X;X;X;X;X	XXXXXXXXXXXPPPPPPPPPPPPXXXXXXXX	S(0.003)Y(0.001)S(0.074)PY(0.919)D(0.003)MLESIR	S(-24.57)Y(-28.68)S(-10.96)PY(10.96)D(-25.58)M(-45.78)LE(-84.75)S(-98.34)IR(-117.75)	5	2	-2.1115	By MS/MS	By MS/MS	By MS/MS	1060600000	1060600000	0	0	2.9529	483800000	480180000	0	NaN	NaN	0
Q5HYG8;B4DJQ3;A0A024RB99;V9HW06;Q53ET4;P34897;Q5BJF5;G3V5L0;G3V241;G3V3Y8;G3V4T0;G3V4X0;G3V2W0;G3V2E4;G3V540;G3V4W5	84;84;84;105;105;105;81;84;84;84;84;84;84;105;84;105	Q5HYG8	Q5HYG8	Serine hydroxymethyltransferase;Serine hydroxymethyltransferase, mitochondrial	DKFZp686P09201;SHMT2;HEL-S-51e		0.499977	0	1.90559e-28	143.97	115.46	118.16	0.330425	0	5.85118e-06	69.451	0.499977	0	2.6638e-18	118.16	0.499793	0	1.90559e-28	143.97		1	Y	SCLNNKYPEGYPGKRYYGGAEVVDEIELLCQ	X;X;X;X;X;X;X;X;X;X;X;X;X;X;X;B2;X;X;X;X;X;X;X;X;X;X;X;X;X;X;X	XXXXXXXXXXXXXXXPPPPPPPPPPPPPPPP	Y(0.5)Y(0.5)GGAEVVDEIELLCQR	Y(0)Y(0)GGAE(-40.44)VVD(-67.02)E(-74.87)IE(-89.58)LLC(-113.26)Q(-113.16)R(-114.5)	1	3	0.92439		By MS/MS		0	0	0	0	0	0	0	0	0	0	NaN
Q5HYG8;B4DJQ3;A0A024RB99;V9HW06;Q53ET4;P34897;Q5BJF5;G3V5L0;G3V241;G3V3Y8;G3V4T0;G3V4X0;G3V2W0;G3V2E4;G3V540;G3V4W5	85;85;85;106;106;106;82;85;85;85;85;85;85;106;85;106	Q5HYG8	Q5HYG8	Serine hydroxymethyltransferase;Serine hydroxymethyltransferase, mitochondrial	DKFZp686P09201;SHMT2;HEL-S-51e		0.864384	8.14563	1.90559e-28	143.97	115.46	91.969	0.864384	8.14563	6.18342e-07	91.969	0.499977	0	2.6638e-18	118.16	0.499793	0	1.90559e-28	143.97		1	Y	CLNNKYPEGYPGKRYYGGAEVVDEIELLCQR	X;X;X;X;X;X;X;X;X;X;X;X;X;X;X;B2;X;X;X;X;X;X;X;X;X;X;X;X;X;X;X	XXXXXXXXXXXXXXPPPPPPPPPPPPPPPPP	Y(0.132)Y(0.864)GGAE(0.003)VVDEIELLCQR	Y(-8.15)Y(8.15)GGAE(-24.55)VVD(-39.71)E(-47.67)IE(-62.63)LLC(-86.86)Q(-86.76)R(-90.19)	2	3	0.47697	By MS/MS	By MS/MS		75781000	75781000	0	0	0.90972	75781000	0	0	5.0071	0	NaN
A0A024R7T3;P52597;B4DKS8;A0A384MEJ3;G8JLB6;P31943;E9PCY7;H0YB39;Q68DG4;H0YBD7;H0YBG7;B4DP51	306;306;229;306;306;306;306;181;128;120;62;36	A0A024R7T3;A0A384MEJ3	A0A384MEJ3	Heterogeneous nuclear ribonucleoprotein F;Heterogeneous nuclear ribonucleoprotein F, N-terminally processed;Heterogeneous nuclear ribonucleoprotein H;Heterogeneous nuclear ribonucleoprotein H, N-terminally processed	HNRPF;HNRNPF;HNRNPH1;DKFZp686A15170		0.639312	7.31886	2.48308e-28	142.07	117.73	142.07	0.472268	5.01267	1.81034e-06	73.296	0.639312	7.31886	2.48308e-28	142.07	0	0		NaN		1	Y	VHMRGLPYKATENDIYNFFSPLNPVRVHIEI;VHMRGLPYRATENDIYNFFSPLNPVRVHIEI	X;X;X;X;X;X;X;X;X;X;X;X;X;X;X;B2;X;X;X;X;X;X;X;X;X;X;X;X;X;X;X	XXXXXXXXXPPPPPPPPPPPPPPPPPXXXXX	AT(0.119)E(0.081)N(0.081)D(0.081)IY(0.639)N(0.001)FFSPLNPVR	AT(-7.32)E(-9)N(-9)D(-9)IY(7.32)N(-29.94)FFS(-73.06)PLN(-112.26)PVR(-134.34)	7	2	-1.7956	By matching	By MS/MS	By matching	1319100000	1319100000	0	0	0.42107	86903000	328580000	201960000	0.072461	0.44066	0.17002
A0A384N6B9;F8VZX2;H3BSS4;Q15366;H3BRU6;B4DRD7	350;305;168;349;285;266	A0A384N6B9;Q15366	A0A384N6B9	Poly(rC)-binding protein 2	PCBP2		0.981996	18.1906	4.02762e-28	130	91.485	122.22	0.90403	9.88475	4.02762e-28	130	0.905141	10.7624	1.04711e-15	110.29	0.981996	18.1906	6.53639e-22	122.22		1	Y	QVTITGSAASISLAQYLINVRLSSETGGMGS	X;X;X;X;X;X;X;X;X;X;X;X;X;X;X;B2;X;X;X;X;X;X;X;X;X;X;X;X;X;X;X	PPPPPPPPPPPPPPPPPPPPPXXXXXXXXXX	QVTITGSAASISLAQ(0.015)Y(0.982)LIN(0.003)VR	Q(-108.2)VT(-100.82)IT(-89.65)GS(-89.65)AAS(-71.28)IS(-49.8)LAQ(-18.19)Y(18.19)LIN(-25.73)VR(-33.17)	16	3	2.4248	By MS/MS	By MS/MS	By MS/MS	469210000	469210000	0	0	6.608	135460000	174580000	84945000	2.9248	7.0702	NaN
A0A2R8YEA7;Q8WVW5;Q53G99;Q1KLZ0;P63261;P60709;B4E3A4;Q53GK6;Q53G76;B4DW52;A0A2R8Y793;B3KWQ3;Q6PJ43;B7ZAP6;I3L3I0;I3L1U9;I3L4N8;A0AUL6;Q562R8;Q562P0;Q562N2;Q562Z6;Q562Z7;Q562Y6;Q562X9;Q562N8;Q562N0;Q562L5;Q562S0;Q562U2;Q562Y8;Q562M5;Q562M3;Q562L9	47;157;169;169;169;169;150;169;169;141;153;47;57;88;169;169;160;62;86;86;86;86;86;86;86;86;86;86;86;86;86;86;86;86	A0A2R8YEA7;Q8WVW5;Q562Z7;Q562L9	Q8WVW5	Actin, cytoplasmic 2;Actin, cytoplasmic 2, N-terminally processed;Actin, cytoplasmic 1;Actin, cytoplasmic 1, N-terminally processed	PS1TP5BP1;ACTG1;ACTB;ACT		0.994156	22.7246	6.05289e-27	121.94	103.81	121.94	0.835882	7.93335	2.81682e-11	80.359	0.971508	16.4972	1.41476e-19	107.58	0.994156	22.7246	6.05289e-27	121.94		1	Y	DSGDGVTHTVPIYEGYALPHAILRLDLAGRD	X;X;X;X;X;X;X;X;X;X;X;X;X;X;X;B2;X;X;X;X;X;X;X;X;X;X;X;X;X;X;X	PPPPPPPPPPPPPPPPPPPPPPPPXXXXXXX	TTGIVMDSGDGVTHTVPIYE(0.005)GY(0.994)ALPHAILR	T(-100.17)T(-106.49)GIVM(-76.67)D(-69.99)S(-69.99)GD(-69.99)GVT(-63.47)H(-63.47)T(-63.86)VPIY(-36.09)E(-22.72)GY(22.72)ALPH(-35.42)AILR(-53.87)	22	3	-3.6556	By MS/MS	By MS/MS	By MS/MS	6745700000	6745700000	0	0	0.73714	391490000	302300000	2114200000	0.179	0.13382	0.44935
Q53SS8;Q15365	270;270	Q53SS8	Q53SS8	Poly(rC)-binding protein 1	PCBP1		0.969187	15.1784	3.52202e-26	120.42	93.612	120.42	0.950038	13.922	1.93997e-13	97.124					0.969187	15.1784	3.52202e-26	120.42		1	Y	TGFAGIDSSSPEVKGYWASLDASTQTTHELT	X;X;X;X;X;X;X;X;X;X;X;X;X;X;X;B2;X;X;X;X;X;X;X;X;X;X;X;X;X;X;X	XXXXXXXXXXXXXXPPPPPPPPPPPPPPPPP	GY(0.969)W(0.029)AS(0.001)LDASTQTTHELTIPNNLIGCIIGR	GY(15.18)W(-15.18)AS(-29.58)LD(-35.75)AS(-47.67)T(-47.67)Q(-47.67)T(-47.67)T(-52.77)H(-57.77)E(-68.61)LT(-90.68)IPN(-110.45)N(-114.14)LIGC(-119.89)IIGR(-120.42)	2	3	-1.7055	By MS/MS		By MS/MS	1782900000	1782900000	0	0	2.6085	727820000	0	1055100000	2.7576	0	4.5242
B7Z6P1;A8K3K1;P68133;P68032;Q7Z7J6;A6NL76	93;93;93;93;93;93	B7Z6P1	B7Z6P1	Actin, alpha skeletal muscle;Actin, alpha cardiac muscle 1	ACTA1;ACTC1		0.976672	17.5784	7.51267e-26	149.72	125.69	110.76	0.866381	9.81475	4.96846e-05	93.598	0.97093	16.4859	7.51267e-26	149.72	0.976672	17.5784	6.52559e-07	110.76		1	Y	ITNWDDMEKIWHHTFYNELRVAPEEHPTLLT	X;B2;X;X;X;X;X;X;X;X;X;X;X;X;X;B2;X;X;X;X;X;X;X;X;X;X;X;X;X;X;X	PPPPPPPPPPPPPPPPPPPPXXXXXXXXXXX	IWHHT(0.002)FY(0.977)N(0.017)E(0.004)LR	IW(-82.98)H(-69.76)H(-52.32)T(-26.14)FY(17.58)N(-17.58)E(-24.09)LR(-40.94)	7	2	0.055334	By MS/MS	By MS/MS	By MS/MS	8641400000	8387400000	254030000	0	2.0138	532160000	836450000	678070000	0.43513	0.5549	0.43446
Q5JP53;A0A384NYT8;Q5SU16;P07437;B4DY90;Q6LC01;B4DMU8;B4DMJ5	18;35;36;36;56;29;36;36	Q5JP53	Q5JP53	Tubulin beta chain	TUBB		0.519586	1.7219	1.08526e-25	124.51	68.925	124.51	0.430786	0	4.10716e-06	59.282	0.519586	1.7219	1.08526e-25	124.51	0.415656	0	8.41625e-13	105.03		1	Y	WEVISDEHGIDPTGTYHGDSDLQLDRISVYY	X;X;X;X;X;X;X;X;X;X;X;X;X;X;X;B2;X;X;X;X;X;X;X;X;X;X;X;X;X;B2;X	PPPPPPPPPPPPPPPPPPPPPPPPPPXXXXX	FWEVISDEHGID(0.001)PT(0.013)GT(0.35)Y(0.52)H(0.117)GDSDLQLDR	FW(-89.36)E(-78.11)VIS(-62.48)D(-62.48)E(-62.48)H(-57.02)GID(-29.92)PT(-16.08)GT(-1.72)Y(1.72)H(-6.46)GD(-34.53)S(-40.52)D(-46.42)LQ(-57.9)LD(-68.93)R(-69.04)	17	4	-0.5812		By MS/MS		2967600000	2967600000	0	0	0.11454	0	2967600000	0	0	0.37452	0
O60888	143	O60888	O60888	Protein CutA	CUTA		0.806614	7.40108	1.16075e-25	118.51	94.224	118.51	0.806614	7.40108	1.16075e-25	118.51										1	Y	SLVPALTDFVRSVHPYEVAEVIALPVEQGNF	X;X;X;X;X;X;X;X;X;X;X;X;X;X;X;B2;X;X;X;X;X;X;X;X;X;X;X;X;X;X;X	XXXXXXXXXXXPPPPPPPPPPPPPPPPPPPP	S(0.023)VH(0.023)PY(0.807)E(0.147)VAE(0.001)VIALPVEQGNFPYLQWVR	S(-15.49)VH(-15.49)PY(7.4)E(-7.4)VAE(-28.79)VIALPVE(-71.95)Q(-77.53)GN(-77.84)FPY(-94.05)LQ(-107.41)W(-112.61)VR(-112.48)	5	3	-3.6052	By MS/MS			137050000	137050000	0	0	0.50896	137050000	0	0	1.2562	0	NaN
P68363;A8JZY9;B3KPS3;B3KT06;B4DDU2;C9JDS9;P68366;Q71U36;B4DQK4;Q1ZYQ1;P0DPH8;P0DPH7;Q6PEY2;Q9UQM3	282;282;247;247;129;129;282;282;216;282;282;282;282;159	P68363;P68366;Q71U36;Q9UQM3	P68363	Tubulin alpha-1B chain;Tubulin alpha-4A chain;Tubulin alpha-1A chain;Tubulin alpha-3E chain	TUBA1B;TUBA4A;TUBA1A;TUBA2;TUBA3E		0.97586	16.8124	9.84138e-25	127.92	112.77	127.92	0.974768	16.6396	2.6345e-11	102.21	0.806503	7.17819	8.65318e-08	92.565	0.97586	16.8124	9.84138e-25	127.92		1	Y	FPLATYAPVISAEKAYHEQLSVAEITNACFE	X;X;X;X;B2;B2;X;X;X;X;X;X;X;X;X;B2;X;X;X;X;X;X;X;X;X;X;X;X;X;X;X	XXXXXXXXXXXXXXPPPPPPPPPPPPPPPPP	AY(0.976)H(0.02)E(0.003)Q(0.001)LSVAEITNACFEPANQMVK	AY(16.81)H(-16.81)E(-24.9)Q(-32)LS(-44.32)VAE(-75.27)IT(-98.02)N(-99.17)AC(-106.23)FE(-113.24)PAN(-125.65)Q(-126.97)M(-127.59)VK(-127.77)	2	3	0.62598	By MS/MS	By MS/MS	By MS/MS	3044600000	3044600000	0	0	0.80811	693370000	811240000	1511600000	0.59109	0.62135	1.1728
P63241;I3L397;I3L504	98;98;98	P63241	P63241	Eukaryotic translation initiation factor 5A-1;Eukaryotic translation initiation factor 5A	EIF5A		0.962826	14.4761	7.15693e-24	125.08	106.62	125.08	0.923804	13.1416	1.98452e-17	116.74	0.749861	6.07862	2.22128e-23	118.05	0.962826	14.4761	7.15693e-24	125.08		1	Y	NIKRNDFQLIGIQDGYLSLLQDSGEVREDLR	X;X;X;X;X;X;X;X;X;X;X;X;X;X;X;B2;X;X;X;X;X;X;X;X;X;X;X;X;X;X;X	XXXPPPPPPPPPPPPPPPPPPPPPPPPXXXX	RNDFQLIGIQD(0.002)GY(0.963)LS(0.034)LLQ(0.001)DSGEVR	R(-91.95)N(-91.95)D(-88.71)FQ(-82.04)LIGIQ(-38.03)D(-27.25)GY(14.48)LS(-14.48)LLQ(-31.67)D(-37.28)S(-47.5)GE(-52.09)VR(-71.63)	13	3	-0.82102	By MS/MS	By MS/MS	By MS/MS	2195000000	2195000000	0	0	0.35049	329980000	129720000	451260000	0.11858	0.14047	0.17652
P22626;A0A384NL58;A0A024RA28	331;331;279	P22626	P22626	Heterogeneous nuclear ribonucleoproteins A2/B1	HNRNPA2B1;HNRPA2B1		0.807977	9.8616	8.14105e-24	124.16	112.47	110.33	0.729007	7.17491	4.50294e-11	105.31	0.807977	9.8616	9.87993e-17	110.33	0.327479	0	8.14105e-24	124.16		1	Y	MKSGNFGGSRNMGGPYGGGNYGPGGSGGSGG	X;X;X;X;X;X;X;X;X;X;X;X;X;X;X;B2;X;X;X;X;X;X;X;X;X;X;X;X;X;X;X	XXXXXXXXXXPPPPPPPPPPPPPPPPPPPPP	N(0.041)M(0.041)GGPY(0.808)GGGN(0.083)Y(0.027)GPGGSGGSGGYGGR	N(-12.98)M(-12.98)GGPY(9.86)GGGN(-9.86)Y(-14.74)GPGGS(-81.58)GGS(-96.68)GGY(-108.55)GGR(-109.51)	6	3	-0.95264	By MS/MS	By MS/MS		473690000	473690000	0	0	2.6023	217840000	255850000	0	5.6839	3.7124	0
A0A024R7T3;P52597;B4DKS8	276;276;199	A0A024R7T3	A0A024R7T3	Heterogeneous nuclear ribonucleoprotein F;Heterogeneous nuclear ribonucleoprotein F, N-terminally processed	HNRPF;HNRNPF		0.905993	10.8124	9.08766e-24	137.27	131.3	130.81					0.851228	8.45041	9.08766e-24	137.27	0.905993	10.8124	3.75222e-23	130.81		1	Y	GRDLSYCLSGMYDHRYGDSEFTVQSTTGHCV	X;X;X;X;B2;X;X;X;X;X;X;B2;B2;B2;B2;B2;X;X;X;X;X;X;X;X;X;X;X;X;X;X;X	XXXXXXXXXXXXXXXPPPPPPPPPPPPPPPP	Y(0.906)GD(0.075)S(0.018)E(0.001)FTVQSTTGHCVHMR	Y(10.81)GD(-10.81)S(-17)E(-30.57)FT(-58.9)VQ(-90.51)S(-99.04)T(-106.42)T(-113.23)GH(-121.52)C(-124.5)VH(-129.41)M(-130.63)R(-130.81)	1	4	-0.95844		By MS/MS	By MS/MS	167030000	167030000	0	0	1.3521	0	99645000	67388000	0	2.0704	1.3577
A0A024R563;Q96C90	81;29	A0A024R563	A0A024R563	Protein phosphatase 1 regulatory subunit 14B	PPP1R14B		0.991288	21.5287	9.82915e-24	120.32	114.74	99.957	0.971185	18.3053	5.22255e-12	105.16	0.991288	21.5287	9.82915e-24	120.32	0.986733	19.4272	1.35023e-16	108.4		1	Y	APAPGPGSGGPGPRVYFQSPPGAAGEGPGGA	X;X;X;X;X;X;X;X;X;X;X;X;X;X;X;B2;X;X;X;X;X;X;X;X;X;X;X;X;X;X;X	XXXXXXXXXXXXXXPPPPPPPPPPPPPPPPP	VY(0.991)FQ(0.007)S(0.002)PPGAAGEGPGGADDEGPVR	VY(21.53)FQ(-21.53)S(-27.56)PPGAAGE(-58.75)GPGGAD(-87.76)D(-93.31)E(-97.55)GPVR(-99.96)	2	3	-0.10365	By MS/MS	By MS/MS	By MS/MS	687120000	687120000	0	0	9.8036	97134000	111280000	99123000	4.5526	4.3937	4.2312
D3DWK1;B2RAR6;E9PRY8;P29692;E9PQZ1;E9PK01;A0A087X1X7;Q71RH4;Q9H7G6;E9PQ49;E9PI39;E9PPR1;E9PL12;E9PMW7;E9PIZ1;H0YCK7;E9PK06;E9PK72;E9PKK3;Q9BW34;E9PL71;E9PN91	392;392;442;26;26;26;392;392;392;26;26;26;26;26;42;106;26;26;26;319;26;26	D3DWK1;Q9BW34	D3DWK1	Elongation factor 1-delta	EEF1D		0.999937	42.1052	1.00284e-23	171.92	139.51	171.92	0.997285	26.9676	2.01977e-18	132.17	0.999937	42.1052	1.00284e-23	171.92	0.999915	40.841	3.28323e-22	152.7		1	Y	IWFDKFKYDDAERRFYEQMNGPVAGASRQEN;IWFDKFKYDDAERRFYEQMNGPVAGASRQSS	X;X;X;X;X;X;X;B2;X;X;X;X;X;X;X;B2;X;X;X;X;X;X;X;X;X;X;X;X;X;X;X	XXXXXXXXXXXXXXPPPPPPPPPPPPPPXXX	FY(1)EQMNGPVAGASR	FY(42.11)E(-42.11)Q(-58.24)M(-92.72)N(-108.6)GPVAGAS(-170.17)R(-171.92)	2	2	0.6567	By MS/MS	By MS/MS	By MS/MS	799370000	799370000	0	0	NaN	133270000	209850000	171690000	NaN	NaN	NaN
V9HW31;P06576;H0YH81;Q0QEN7	395;395;332;331	V9HW31	V9HW31	ATP synthase subunit beta;ATP synthase subunit beta, mitochondrial	HEL-S-271;ATP5B		0.998072	27.1825	1.50337e-23	134.56	115.89	127.56	0.998072	27.1825	4.58017e-18	127.56	0.981972	17.362	1.50337e-23	134.56	0.982917	17.6284	1.11163e-10	105.65		1	Y	DATTVLSRAIAELGIYPAVDPLDSTSRIMDP	X;X;X;X;X;X;X;X;X;X;X;X;X;X;X;B2;X;X;X;X;X;X;X;X;X;X;X;X;X;X;X	XXXXXXXXPPPPPPPPPPPPPPPPPPPXXXX	AIAE(0.002)LGIY(0.998)PAVDPLDSTSR	AIAE(-27.18)LGIY(27.18)PAVD(-47.31)PLD(-77.62)S(-98.26)T(-96.83)S(-102.22)R(-107.92)	8	2	-0.72702	By MS/MS	By MS/MS	By MS/MS	191970000	191970000	0	0	7.3869	46395000	45685000	70685000	NaN	3.0963	6.2928
V9HW43;P04792;F8WE04	23;23;23	V9HW43	V9HW43	Heat shock protein beta-1	HEL-S-102;HSPB1		0.964275	14.9618	2.12355e-23	139.58	128.28	139.58	0.941916	12.3	1.86202e-19	133.48	0.964275	14.9618	2.12355e-23	139.58	0.811078	6.40394	6.70312e-09	107.82		1	Y	FSLLRGPSWDPFRDWYPHSRLFDQAFGLPRL	X;X;X;X;X;X;X;X;X;X;X;X;X;X;X;B2;X;X;X;X;X;X;X;X;X;X;X;X;X;X;X	XXXXXPPPPPPPPPPPPPPPXXXXXXXXXXX	GPSWDPFRD(0.001)W(0.031)Y(0.964)PH(0.003)S(0.001)R	GPS(-105.74)W(-93.26)D(-79.03)PFR(-37.06)D(-29.75)W(-14.96)Y(14.96)PH(-24.94)S(-32.23)R(-40.64)	11	3	-0.42426	By MS/MS	By MS/MS	By MS/MS	4155300000	4155300000	0	0	44.547	58433000	93749000	100840000	2.0164	2.8926	3.162
B3KXH0;A0A384P5T6;A0A494C039;Q9Y4L1;A0A087X054;B7Z2N4;B7Z766;B7Z602	746;755;755;755;693;737;604;411	B3KXH0	B3KXH0	Hypoxia up-regulated protein 1	HYOU1		0.999923	41.1537	3.08524e-23	142.08	126.82	142.08	0.918017	10.5933	2.12654e-05	88.187	0.794138	5.97859	1.58316e-05	73.435	0.999923	41.1537	3.08524e-23	142.08		1	Y	ANSLEAFIFETQDKLYQPEYQEVSTEEQREE	X;X;X;X;X;X;X;X;X;X;X;X;X;X;X;B2;X;X;X;X;X;X;X;X;X;X;X;X;X;X;X	XXXXXXXXXXXXXXPPPPPPPPPPPPPPPXX	LY(1)QPEYQEVSTEEQR	LY(41.15)Q(-41.15)PE(-74.7)Y(-81.83)Q(-97.24)E(-110.45)VS(-121.3)T(-126.22)E(-130.77)E(-136.24)Q(-140.5)R(-142.08)	2	2	0.47825	By MS/MS	By MS/MS	By MS/MS	58774000	58774000	0	0	0.91206	12386000	26501000	19887000	0.68482	1.1264	0.87116
A0A024R7C7;Q12906;F4ZW64;A8K590;F4ZW65;B4DFG4;Q59GP7;K7EKJ9;K7ER69;K7EM82;K7EJ09;K7ERM6;K7ENK6;F4ZW66	22;22;22;22;22;22;31;22;22;22;19;22;22;22	A0A024R7C7;F4ZW66	F4ZW66	Interleukin enhancer-binding factor 3	ILF3		0.738173	6.64239	4.2735e-23	122.18	108.55	122.18					0.738173	6.64239	4.2735e-23	122.18	0.679284	6.48429	1.00484e-15	105.22		1	Y	FVNDDRHVMAKHSSVYPTQEELEAVQNMVSH	X;X;X;X;X;X;X;X;X;X;X;X;X;X;X;B2;X;X;X;X;X;X;X;X;X;X;X;X;X;X;X	XXXXXXXXXXXPPPPPPPPPPPPPPPPPPPP	H(0.029)S(0.029)S(0.16)VY(0.738)PT(0.019)Q(0.019)E(0.006)ELEAVQNMVSHTER	H(-14.1)S(-14.1)S(-6.64)VY(6.64)PT(-15.82)Q(-15.82)E(-21.28)E(-33.62)LE(-64.95)AVQ(-81.86)N(-90.9)M(-94.66)VS(-105.59)H(-110.58)T(-113.67)E(-110.16)R(-113.5)	5	4	0.6327		By MS/MS	By matching	160190000	160190000	0	0	0.12237	0	84478000	75711000	0	0.17479	0.11993
H0YDR3;Q8N5M4	45;147	H0YDR3	H0YDR3	Tetratricopeptide repeat protein 9C	TTC9C		0.999881	39.2393	5.87139e-23	168.61	132.66	168.61	0.999881	39.2393	5.87139e-23	168.61	0.990174	20.0336	1.69862e-22	143.31	0.998476	28.1648	1.85559e-22	147.18		1	Y	LAAVNRQPKDANVRRYLQLTQSELSSYHRKE	X;X;X;X;X;X;X;X;X;X;X;X;X;X;X;B2;X;X;X;X;X;X;X;X;X;X;X;X;B2;X;X	XXXXXXXXXXXXXXXPPPPPPPPPPPPPPXX	Y(1)LQLTQSELSSYHR	Y(39.24)LQ(-39.24)LT(-95.25)Q(-114.6)S(-131.01)E(-137.61)LS(-153.22)S(-155.19)Y(-160.22)H(-166.25)R(-168.61)	1	3	-0.54854	By MS/MS	By MS/MS	By MS/MS	473520000	458860000	14658000	0	NaN	138670000	151450000	183400000	NaN	NaN	NaN
Q6IB11;O00264	113;113	Q6IB11	Q6IB11	Membrane-associated progesterone receptor component 1	PGRMC1		0.999861	38.5853	3.06314e-22	145.9	113.12	134.23	0.999861	38.5853	1.4403e-18	134.23	0.998506	28.2525	1.4403e-18	134.23	0.999274	31.3907	3.06314e-22	145.9		1	Y	FDVTKGRKFYGPEGPYGVFAGRDASRGLATF	X;X;X;X;X;X;X;X;X;X;X;X;X;X;X;B2;X;X;X;X;X;X;X;X;X;X;X;X;X;X;X	XXXXXXXPPPPPPPPPPPPPPPXXXXXXXXX	FYGPEGPY(1)GVFAGR	FY(-81.63)GPE(-38.59)GPY(38.59)GVFAGR(-71.04)	8	2	-0.73417	By MS/MS	By MS/MS	By MS/MS	4666400000	4666400000	0	0	269.69	705300000	825610000	797350000	40.762	NaN	NaN
A0A384ME17;P49411	249;246	A0A384ME17	A0A384ME17	Elongation factor Tu, mitochondrial	TUFM		0.915827	10.877	3.07708e-22	146.11	107.7	123.63	0.915827	10.877	1.27193e-12	123.63	0.911903	10.6714	2.21016e-12	120.09	0.912282	10.2478	3.07708e-22	146.11		1	Y	LGLKSVQKLLDAVDTYIPVPARDLEKPFLLP	X;X;X;X;X;X;X;X;X;X;X;X;X;X;X;B2;X;X;X;X;X;X;X;X;X;X;X;X;X;X;X	XXXXXXXXPPPPPPPPPPPPPPXXXXXXXXX	LLDAVD(0.009)T(0.075)Y(0.916)IPVPAR	LLD(-46.8)AVD(-19.93)T(-10.88)Y(10.88)IPVPAR(-70.84)	8	2	1.2706	By MS/MS	By MS/MS	By MS/MS	2075700000	2075700000	0	0	8.3431	285690000	286320000	393730000	3.8447	3.7465	4.0151
J3KT04;J3QLN6;J3QKZ9;B4E102;J3KS93;E7EMV8;Q86WD0;P60842;A8K7F6;A8K088;J3KT12;Q59F68;J3QS69;J3KTB5;J3QL43;J3QR64;B4E047;E7EQG2;Q14240;J3KS25;J3KSN7	71;34;34;54;54;71;61;70;70;70;70;68;70;54;70;81;70;71;71;68;54	J3KT04;J3QLN6;P60842	P60842	Eukaryotic initiation factor 4A-I;Eukaryotic initiation factor 4A-II;Eukaryotic initiation factor 4A-II, N-terminally processed	EIF4A1;EIF4A2		0.999921	41.0321	3.36031e-22	159.94	137.31	159.94	0.990384	20.1279	3.36031e-22	150.22	0.999921	41.0321	3.04661e-22	159.94	0.992531	21.2348	3.17564e-22	155.99		1	Y	PSAIQQRAILPCIKGYDVIAQAQSGTGKTA_;PSAIQQRAILPCIKGYDVIAQAQSGTGKTAT	X;X;X;X;X;X;X;X;X;X;X;X;X;X;X;B2;X;X;X;X;X;X;X;X;X;X;X;X;X;X;X	XXXXXXXXXXXXXXPPPPPPPPPPPPPPXXX	GY(1)DVIAQAQSGTGK	GY(41.03)D(-41.03)VIAQ(-102.41)AQ(-133.15)S(-144.05)GT(-153.83)GK(-159.22)	2	2	-0.0093902	By MS/MS	By MS/MS	By MS/MS	6072000000	6072000000	0	0	25.541	1166100000	1579500000	1813600000	17.548	18.779	20.805
B0QY89;Q9Y262;B4DQF6;B3KPB9;B0QY90	290;247;214;290;149	B0QY89	B0QY89	Eukaryotic translation initiation factor 3 subunit L	EIF3L		0.754184	8.41375	1.83172e-21	121.76	114.11	121.76	0.663781	5.5041	1.17079e-10	103.13	0.754184	8.41375	1.83172e-21	121.76	0.671568	4.84185	6.86235e-06	83.393		1	Y	HSLVDKSNINRQLEVYTSGGDPESVAGEYGR	X;X;X;X;X;X;X;X;X;X;X;X;X;X;X;B2;X;X;X;X;X;X;X;X;X;X;X;X;X;X;X	XXXXXXXXXXXPPPPPPPPPPPPPPPPPPPP	Q(0.012)LE(0.109)VY(0.754)T(0.109)S(0.016)GGDPESVAGEYGR	Q(-17.91)LE(-8.41)VY(8.41)T(-8.41)S(-16.76)GGD(-33.21)PE(-66.47)S(-71.47)VAGE(-96.57)Y(-106.29)GR(-113.71)	5	2	-0.064156	By MS/MS	By MS/MS	By MS/MS	394090000	394090000	0	0	4.9484	76546000	96107000	83581000	3.8047	3.3492	2.7114
B4DY28;A0A384P5K2;P21291;B3KVC9;B4E2T4;E9PS42;Q59EQ5	18;18;18;18;18;18;17	B4DY28	B4DY28	Cysteine and glycine-rich protein 1	CSRP1		0.987628	19.1666	1.1554e-20	130.47	123.43	125.52	0.968542	14.8887	1.1554e-20	130.47	0.987628	19.1666	4.65549e-15	125.52	0.9833	17.8739	6.70125e-15	124.25		1	Y	NWGGGKKCGVCQKTVYFAEEVQCEGNSFHKS	X;X;X;X;X;X;X;X;X;X;X;X;X;X;X;B2;X;X;X;X;X;X;X;X;X;X;X;X;X;X;X	XXXXXXXXXXXXXPPPPPPPPPPPPPPPPPX	T(0.012)VY(0.988)FAEEVQCEGNSFHK	T(-19.17)VY(19.17)FAE(-33.87)E(-58.85)VQ(-94.88)C(-107.07)E(-106.45)GN(-110.84)S(-115.36)FH(-122.55)K(-122.46)	3	3	-1.1431	By MS/MS	By MS/MS	By MS/MS	1146800000	1146800000	0	0	0.57739	304430000	404850000	437510000	0.56182	0.68567	0.51239
A0A087WTT1;E7EQV3;B4DZW4;A0A024R9C1;P11940;A0A024R9E2;B3KT93;E5RGH3;B1ANR0;Q6IQ30;Q13310;H0Y5F5;H0YEQ8;E5RJB9;B1ANR1	91;71;71;116;116;116;116;71;116;116;116;18;60;116;116	A0A087WTT1;B1ANR0	A0A087WTT1	Polyadenylate-binding protein;Polyadenylate-binding protein 1;Polyadenylate-binding protein 4	PABPC1;PABPC4		0.899416	9.7725	1.47643e-20	137.55	119.82	137.55					0.899416	9.7725	1.47643e-20	137.55	0.685447	3.99582	4.00572e-06	85.845		1	Y	IFIKNLDKSIDNKALYDTFSAFGNILSCKVV;VFIKNLDKSIDNKALYDTFSAFGNILSCKVV	X;X;X;X;X;X;X;X;X;X;X;X;X;X;X;B2;X;X;X;X;X;X;X;X;X;X;X;X;X;X;X	XXXXXXXXXXXXXPPPPPPPPPPPPPPPPXX	ALY(0.899)D(0.095)T(0.006)FSAFGNILSCK	ALY(9.77)D(-9.77)T(-21.9)FS(-62.8)AFGN(-114.83)ILS(-131.94)C(-136.48)K(-137.55)	3	2	-1.1394		By MS/MS	By MS/MS	1392400000	1392400000	0	0	39.029	0	319470000	209460000	NaN	8.9552	NaN
A0A0C4DGQ5;P04632;A0A075B7C0;K7ELJ7;U3KQE2;K7EIV0;K7EM73	87;87;38;87;19;32;87	A0A0C4DGQ5	A0A0C4DGQ5	Calpain small subunit 1	CAPNS1		0.973035	19.4556	1.07255e-19	135.14	124.5	135.14	0	0		NaN					0.973035	19.4556	1.07255e-19	135.14		1	Y	AAAQYNPEPPPPRTHYSNIEANESEEVRQFR	X;X;X;X;B2;X;X;X;X;X;X;X;X;X;X;B2;X;X;X;X;X;X;X;X;X;X;X;X;X;X;X	XXXXXXXXXXXXXPPPPPPPPPPPPPPPXXX	T(0.011)H(0.011)Y(0.973)S(0.005)NIEANESEEVR	T(-19.46)H(-19.46)Y(19.46)S(-23.12)N(-37.93)IE(-68.92)AN(-84.33)E(-96.8)S(-107.2)E(-115.61)E(-118.9)VR(-127.92)	3	3	0.19516	By matching		By MS/MS	112140000	112140000	0	0	0.88694	74142000	0	37996000	2.1751	0	0.79394
Q6IPT9;Q6IPS9;Q53HR5;Q53HQ7;Q53HM9;Q53G85;P68104;A0A4D5RAC9;A8K9C4;Q6IPN6;Q53GA1;A0A4D5RAC7;Q53GE9;Q5VTE0;Q96RE1;A0A4D5RAE2;A0A4D5RAN2;A0A087WVQ9;B4DV42;Q8IUB0;Q53HR1;B4DNE0;Q53G89;A0A4D5RA52;Q504Z0;Q6P4C9;Q9NZS6;Q96CD8;A0A4D5RAR2;B4E2C5;Q96C29;Q8TBL1;Q6P082;A0A4D5RBD4;A0A4D5RBH1;A0A4D5RAB6;A0A4D5RBL9;Q96EB3;Q2F837;A0A4D5RBE6;Q14222;A0A4D5RA59	418;418;418;418;418;418;418;411;418;418;418;381;418;418;354;355;371;397;370;317;322;351;389;415;264;246;382;243;253;264;204;206;207;161;146;170;111;117;49;105;183;15	Q6IPT9	Q6IPT9	Elongation factor 1-alpha;Elongation factor 1-alpha 1;Putative elongation factor 1-alpha-like 3	EEF1A1;EEF1A1P5;EEF1A1L14;EEF1A		0.938521	11.9089	2.39795e-19	133.81	120.85	133.81	0.934399	13.05	9.02083e-10	92.41	0.918264	11.2231	4.50297e-13	118.28	0.938521	11.9089	2.39795e-19	133.81		1	Y	DMVPGKPMCVESFSDYPPLGRFAVRDMRQTV	X;X;X;X;X;X;X;X;X;X;X;X;X;X;X;B2;X;X;X;X;X;X;X;X;X;X;X;X;X;X;X	PPPPPPPPPPPPPPPPPPPPPXXXXXXXXXX	PMCVESFS(0.001)D(0.06)Y(0.939)PPLGR	PM(-113.6)C(-98.27)VE(-72.65)S(-56.14)FS(-31.28)D(-11.91)Y(11.91)PPLGR(-34.86)	10	2	-1.4217	By MS/MS	By MS/MS	By MS/MS	763970000	763970000	0	0	0.26213	52420000	51290000	65725000	0.061751	0.089319	0.044072
A0A384N6B9;F8VZX2;F8VRH0	278;233;118	A0A384N6B9;F8VRH0	A0A384N6B9		PCBP2		0.976984	16.2904	3.25551e-19	107.87	95.671	107.87					0.976984	16.2904	3.25551e-19	107.87	0.975491	16.0568	2.1726e-14	101.59		1	Y	TGFSGIESSSPEVKGYWAGLDASAQTTSHEL	X;X;X;X;X;X;X;X;X;X;X;X;X;X;X;B2;X;X;X;X;X;X;X;X;X;X;X;X;X;X;X	XXXXXXXXXXXXXXPPPPPPPPPPPPPPPPP	GY(0.977)W(0.023)AGLDASAQTTSHELTIPNDLIGCIIGR	GY(16.29)W(-16.29)AGLD(-45.59)AS(-52.46)AQ(-52.46)T(-52.46)T(-52.46)S(-52.46)H(-52.46)E(-56.58)LT(-70.53)IPN(-85.95)D(-92.35)LIGC(-107.15)IIGR(-107.87)	2	4	-0.3268		By MS/MS	By MS/MS	2444400000	2444400000	0	0	4.5593	0	1131300000	1029100000	0	7.4556	8.3338
A0A384NL53;P16152	253;253	A0A384NL53	A0A384NL53	Carbonyl reductase [NADPH] 1	CBR1		0.975019	17.1126	3.45437e-19	107.29	94.097	79.407	0.966821	15.5904	4.48526e-10	88.413	0.975019	17.1126	3.45437e-19	107.29	0.962391	14.8368	8.14001e-08	73.299		1	Y	PKATKSPEEGAETPVYLALLPPDAEGPHGQF	X;X;X;X;X;X;X;X;X;X;X;X;X;X;X;B2;X;X;X;X;X;X;X;X;X;X;X;X;X;X;X	XXXXXPPPPPPPPPPPPPPPPPPPPPPPPPP	SPEEGAE(0.006)T(0.019)PVY(0.975)LALLPPDAEGPHGQFVSEK	S(-48.49)PE(-43.35)E(-36.94)GAE(-22.31)T(-17.11)PVY(17.11)LALLPPD(-45.04)AE(-52.56)GPH(-58.85)GQ(-58.27)FVS(-60.44)E(-60.44)K(-60.16)	11	3	-0.33437	By MS/MS	By MS/MS	By MS/MS	1612000000	1612000000	0	0	1.2055	339550000	229540000	496110000	0.88081	0.63306	0.84207
V9HWB8;P14618;A0A024R5Z9;H3BTN5;A0A024R609;H3BQ34;H3BUW1;H3BTJ2;H3BT25	105;105;105;105;105;105;105;105;105	V9HWB8	V9HWB8	Pyruvate kinase;Pyruvate kinase PKM	HEL-S-30;PKM;PKM2		0.921084	10.6714	1.72227e-18	133.23	111.48	120.09	0.898663	9.47835	1.72227e-18	133.23	0.921084	10.6714	2.21016e-12	120.09	0.885639	8.90839	0.000304602	57.348		1	Y	NVRTATESFASDPILYRPVAVALDTKGPEIR	X;X;X;X;X;X;X;X;X;X;X;X;X;X;X;B2;X;X;X;X;X;X;X;X;X;X;X;X;X;X;X	XXXPPPPPPPPPPPPPPPPPPPPPPPXXXXX	TATESFASDPILY(0.921)R(0.079)	T(-114.99)AT(-106.27)E(-96.24)S(-92.11)FAS(-79.21)D(-64.78)PILY(10.67)R(-10.67)	13	2	-1.7354	By MS/MS	By MS/MS	By MS/MS	625110000	625110000	0	0	0.24384	84008000	75560000	99207000	0.12956	0.12785	0.074921
A0A024R172;Q14914;F2Z3J9	262;262;262	A0A024R172;Q14914	Q14914	Prostaglandin reductase 1	LTB4DH;PTGR1		0.771403	6.24963	3.60657e-18	120.11	82.378	120.11	0.771403	6.24963	3.60657e-18	120.11					0.599573	3.07528	1.03763e-07	93.517		1	Y	RTGPLPPGPPPEIVIYQELRMEAFVVYRWQG	X;X;X;X;X;X;X;X;X;X;X;X;X;X;X;B2;X;X;X;X;X;X;X;X;X;X;B2;X;X;X;X	XPPPPPPPPPPPPPPPPPPPXXXXXXXXXXX	TGPLPPGPPPEIVIY(0.771)Q(0.183)E(0.044)LR(0.002)	T(-103.88)GPLPPGPPPE(-64.07)IVIY(6.25)Q(-6.25)E(-12.45)LR(-26.35)	15	3	-0.78799	By matching		By MS/MS	1159700000	1159700000	0	0	5.8972	626750000	0	532910000	14.668	0	5.8042
Q5JR94;P62241;Q5JR95	109;109;89	Q5JR94	Q5JR94	40S ribosomal protein S8	RPS8		0.907185	10.2775	6.40752e-18	182.39	156.01	132.01	0.907185	10.2775	7.59201e-14	132.01	0.879328	8.84408	3.84348e-15	151.83	0.888075	8.99938	6.40752e-18	182.39		1	Y	KTLVKNCIVLIDSTPYRQWYESHYALPLGRK	X;X;X;X;X;X;X;X;X;X;X;X;X;X;X;B2;X;B2;X;B2;X;X;X;X;X;X;X;X;X;X;X	XXXXXPPPPPPPPPPPPXXXXXXXXXXXXXX	NCIVLIDS(0.002)T(0.005)PY(0.907)R(0.085)	N(-127.54)C(-127.54)IVLID(-42.93)S(-25.81)T(-22.35)PY(10.28)R(-10.28)	11	2	-0.92192	By MS/MS	By MS/MS	By MS/MS	274290000	274290000	0	0	NaN	62813000	64106000	147380000	NaN	NaN	NaN
V9HW65;A0A024R5Z7;P07355;H0YN42;H0YMD0;H0YMU9;H0YM50;B3KRQ1;H0YNP5;H0YN28;H0YL33;H0YNA0	188;188;188;188;188;188;157;71;123;71;71;71	V9HW65	V9HW65	Annexin;Annexin A2	HEL-S-270;ANXA2		0.944639	14.8291	1.40916e-17	126.42	119.01	126.42	0.851251	9.5544	1.23793e-05	78.903	0.851359	9.40394	2.54166e-06	82.362	0.944639	14.8291	1.40916e-17	126.42		1	Y	ALAKGRRAEDGSVIDYELIDQDARDLYDAGV	X;X;X;X;X;X;X;X;X;X;X;X;X;X;X;B2;X;X;X;X;X;X;X;X;X;X;X;X;X;X;X	XXXXXXPPPPPPPPPPPPPPPPPPXXXXXXX	RAEDGSVID(0.031)Y(0.945)E(0.024)LIDQDAR	R(-76.03)AE(-70)D(-64.55)GS(-59.01)VID(-14.83)Y(14.83)E(-15.94)LID(-36.49)Q(-47.83)D(-58.72)AR(-80.74)	10	3	-0.62814	By MS/MS	By MS/MS	By MS/MS	1163600000	1163600000	0	0	0.35513	129680000	0	246300000	0.19116	0	0.16938
B7Z478;A0A140VJS6;P49721;Q59FJ0;A0A087WVV1	109;134;134;166;17	B7Z478	B7Z478	Proteasome subunit beta type-2;Proteasome subunit beta type	PSMB2		0.99871	29.0201	1.49637e-17	125.61	92.491	125.61	0.527562	0.479717	1.89725e-05	78.501	0.99871	29.0201	1.49637e-17	125.61	0.566876	1.17	4.27665e-05	69.737		1	Y	DYLAALAKAPFAAHGYGAFLTLSILDRYYTP	X;X;X;X;X;X;X;X;X;X;X;X;X;X;X;B2;X;X;X;X;X;X;X;X;X;X;X;B2;X;X;X	XXXXXXXXPPPPPPPPPPPPPPPPPPPXXXX	APFAAH(0.001)GY(0.999)GAFLTLSILDR	APFAAH(-29.02)GY(29.02)GAFLT(-44.18)LS(-62.69)ILD(-79.02)R(-88.19)	8	2	3.3077	By MS/MS	By MS/MS	By MS/MS	1032900000	1032900000	0	0	1.646	427380000	318430000	239560000	3.5444	0.98208	1.3113
A0A024RAZ7;P09651;F8W6I7;A0A024RB53;Q6IPF2;Q9BSM5;B4E0B5;H0YH80;A0A2R8Y4L2;Q3MI39	357;357;292;305;305;283;239;176;260;152	A0A024RAZ7	A0A024RAZ7	Heterogeneous nuclear ribonucleoprotein A1;Heterogeneous nuclear ribonucleoprotein A1, N-terminally processed	HNRPA1;HNRNPA1		0.997878	29.798	1.60232e-17	125.98	114.28	116.96	0.861456	10.9777	4.93008e-08	93.427	0.997878	29.798	1.03853e-13	116.96	0.947476	16.7932	1.60232e-17	125.98		1	Y	GGGGQYFAKPRNQGGYGGSSSSSSYGSGRRF	X;X;X;X;X;B2;X;X;B2;X;X;X;X;X;X;B2;X;X;X;X;X;X;X;X;X;X;X;X;X;X;X	XXXXXXXXXXXPPPPPPPPPPPPPPPPPPXX	N(0.001)Q(0.001)GGY(0.998)GGSSSSSSYGSGR	N(-29.8)Q(-29.8)GGY(29.8)GGS(-45.59)S(-55.21)S(-64.39)S(-69.78)S(-79.78)S(-87.86)Y(-95.33)GS(-103.46)GR(-101.23)	5	3	-0.24358	By MS/MS	By MS/MS	By MS/MS	2616400000	2616400000	0	0	12.224	512230000	470690000	562980000	9.5967	5.5721	7.3892
V9HW48;O75368;B0AZV6;D3DTE6	63;63;15;62	V9HW48	V9HW48	SH3 domain-binding glutamic acid-rich-like protein	HEL-S-115;SH3BGRL		0.854629	7.693	3.37288e-17	123.28	107.66	123.28	0.854629	7.693	3.37288e-17	123.28	0	0		NaN	0.546242	0.805622	2.09373e-07	85.982		1	Y	WMRENVPENSRPATGYPLPPQIFNESQYRGD	X;X;X;X;X;X;X;X;X;X;X;X;X;X;X;B2;X;X;X;X;X;X;X;X;X;X;X;X;X;X;X	XXXXXXXXXXXPPPPPPPPPPPPPPPPPPXX	PAT(0.145)GY(0.855)PLPPQIFNESQYR	PAT(-7.69)GY(7.69)PLPPQ(-81.34)IFN(-108.42)E(-115.54)S(-117.72)Q(-119.58)Y(-121.98)R(-122.63)	5	3	-1.9059	By MS/MS	By matching	By MS/MS	241460000	241460000	0	0	NaN	44458000	57812000	94262000	NaN	NaN	NaN
C7DJS2	53	C7DJS2	C7DJS2		GSTP1		0.973208	15.7891	5.07138e-17	124.86	103.35	95.775	0.884209	8.93781	8.347e-10	101.6	0.876362	8.61907	5.07138e-17	124.86	0.973208	15.7891	5.07138e-17	124.86		1	Y	NDGVEDLRCKYVSLIYTNYEAGKDDYVKALP	X;X;X;X;X;X;X;X;X;X;X;X;X;X;X;B2;X;X;X;X;X;X;X;X;X;X;X;X;X;X;X	XXXXXXXXXXPPPPPPPPPPPPPPPPPPXXX	YVSLIY(0.973)T(0.026)N(0.001)YEAGK	Y(-55.39)VS(-39.76)LIY(15.79)T(-15.79)N(-30.93)Y(-36.62)E(-49.31)AGK(-47.95)	6	2	-1.5121	By MS/MS	By MS/MS	By MS/MS	5352000000	5352000000	0	0	7.1378	53487000	52628000	87903000	0.17186	0.13695	1.6185
B2R6F3;P84103;A0A087X2D0	13;13;13	B2R6F3	B2R6F3	Serine/arginine-rich splicing factor 3	SFRS3;SRSF3		1	98.2352	6.36526e-17	176.75	147.08	176.75	1	91.3664	3.71315e-16	171.53	1	101.72	3.71315e-16	171.53	1	98.2352	6.36526e-17	176.75		1	Y	___MHRDSCPLDCKVYVGNLGNNGNKTELER	X;X;X;X;X;X;X;X;X;X;X;X;X;X;X;B2;X;X;X;X;X;X;X;X;X;X;X;X;X;X;X	XXXXXXXXXXXXXXPPPPPPPPPPPPXXXXX	VY(1)VGNLGNNGNK	VY(98.24)VGN(-98.24)LGN(-157.5)N(-166.66)GN(-175.11)K(-176.75)	2	2	0.024516	By MS/MS	By MS/MS	By MS/MS	3670600000	3670600000	0	0	26.83	1012800000	1103300000	779380000	30.343	18.784	17.437
A0A384MEJ3;G8JLB6;P31943;E9PCY7;H0YB39;D6RIT2;Q68DG4;H0YBD7;H0YBG7;B4DP51	276;276;276;276;151;139;98;90;32;6	A0A384MEJ3	A0A384MEJ3	Heterogeneous nuclear ribonucleoprotein H;Heterogeneous nuclear ribonucleoprotein H, N-terminally processed	HNRNPH1;DKFZp686A15170		0.733748	4.54188	7.28242e-17	118.64	113.18	115.87	0.563912	1.68562	7.28242e-17	118.64					0.733748	4.54188	3.54715e-13	115.87		1	Y	GRDLNYCFSGMSDHRYGDGGSTFQSTTGHCV	X;X;B2;X;B2;B2;X;X;X;X;X;X;X;B2;B2;B2;X;X;X;X;X;X;X;X;X;X;X;X;X;X;X	XXXXXXXXXXXXXXXPPPPPPPPPPPPPPPP	Y(0.734)GD(0.258)GGS(0.007)T(0.001)FQSTTGHCVHMR	Y(4.54)GD(-4.54)GGS(-20.1)T(-27.73)FQ(-58.27)S(-66.4)T(-80.23)T(-92.54)GH(-102.93)C(-110.2)VH(-114.47)M(-115.52)R(-115.87)	1	4	-0.3798	By MS/MS		By MS/MS	388010000	388010000	0	0	5.8662	195980000	0	192040000	8.6613	0	7.0825
B4DKM6;B4DW02;A0A0J9YXF2;Q15165;A0A0J9YYJ1;Q86X69;G3XAK4;A0A0J9YXU7	193;205;205;184;37;184;184;98	B4DKM6	B4DKM6	Serum paraoxonase/arylesterase 2	PON2		0.511988	3.19876	1.52243e-16	96.123	80.398	96.123									0.511988	3.19876	1.52243e-16	96.123		1	Y	ITAVGPAHFYATNDHYFSDPFLKYLETYLNL	X;X;X;X;X;X;X;X;X;X;X;X;X;X;X;B2;X;X;X;X;X;X;X;X;X;X;X;X;X;X;X	PPPPPPPPPPPPPPPPPPPPPPPXXXXXXXX	HELLPSVNDITAVGPAH(0.002)FY(0.007)AT(0.007)N(0.007)D(0.007)H(0.027)Y(0.512)FS(0.181)D(0.245)PFLK(0.004)	H(-91.59)E(-91.59)LLPS(-82.11)VN(-67.22)D(-64.34)IT(-51.4)AVGPAH(-23.89)FY(-18.39)AT(-18.39)N(-18.39)D(-18.39)H(-12.79)Y(3.2)FS(-4.52)D(-3.2)PFLK(-21.61)	25	4	3.5472			By MS/MS	207930000	207930000	0	0	3.1428	0	0	207930000	NaN	0	NaN
P53618;E9PP73	250;250	P53618	P53618	Coatomer subunit beta	COPB1		0.921573	11.3648	2.08501e-16	120.06	78.409	120.06	0.496463	0	7.02583e-07	100.88	0.811861	9.36053	0.000110293	72.434	0.921573	11.3648	2.08501e-16	120.06		1	Y	CHANPSERARFIRCIYNLLQSSSPAVKYEAA	X;X;X;X;X;X;X;X;X;X;X;X;X;X;X;B2;X;X;X;X;X;X;X;X;X;X;X;X;X;X;X	XXXXXXXXXXXXXPPPPPPPPPPPPPPXXXX	C(0.067)IY(0.922)N(0.011)LLQSSSPAVK	C(-11.36)IY(11.36)N(-19.18)LLQ(-88.22)S(-95.21)S(-101.79)S(-107.85)PAVK(-116.3)	3	2	3.2119		By MS/MS	By MS/MS	82735000	82735000	0	0	NaN	0	28728000	29404000	NaN	NaN	NaN
Q6NTA2;A0A384N6C7;P14866;B2R959;M0QXS5;A0A3B3ITJ4	342;359;359;328;300;307	Q6NTA2	Q6NTA2	Heterogeneous nuclear ribonucleoprotein L	HNRNPL		0.81824	10.8467	2.31512e-16	83.36	74.568	51.544	0	0		NaN	0.630841	5.54698	2.31512e-16	83.36	0.81824	10.8467	3.45381e-10	53.231		1	Y	RMGPPVGGHRRGPSRYGPQYGHPPPPPPPPE	X;X;X;X;X;X;X;X;X;X;X;X;X;X;X;B2;X;X;X;X;X;X;X;X;X;X;X;X;X;X;X	XXXXXXXXXXXXXXXPPPPPPPPPPPPPPPP	Y(0.818)GPQ(0.067)Y(0.067)GH(0.044)PPPPPPPPEYGPHAD(0.001)S(0.001)PVLMVYGLDQSK	Y(10.85)GPQ(-10.85)Y(-10.85)GH(-12.67)PPPPPPPPE(-32.61)Y(-32.61)GPH(-32.61)AD(-31.98)S(-31.65)PVLM(-33.17)VY(-43.61)GLD(-50.2)Q(-50.17)S(-51.54)K(-51.54)	1	4	-1.8874		By MS/MS	By MS/MS	410160000	410160000	0	0	1.0546	0	155770000	167130000	0	1.0824	1.2676
J3QLN6;J3QKZ9;P60842;A8K7F6;A8K088;J3KT12;Q59F68;J3QS69;J3KTB5;J3QL43;J3QR64;J3KSZ0;B4E047;J3KS25	90;90;126;126;126;126;124;124;110;126;137;9;126;124	J3QLN6;P60842	P60842	Eukaryotic initiation factor 4A-I	EIF4A1		0.693026	6.56503	2.37867e-16	110.75	102.27	110.75	0.418388	0	0.00514659	53.444	0.436648	0	0.00476862	66.467	0.693026	6.56503	2.37867e-16	110.75		1	Y	ELAQQIQKVVMALGDYMGASCHACIGGTNVR	X;X;X;X;X;X;X;X;X;X;X;X;X;X;X;B2;X;X;X;X;X;X;X;X;X;X;X;X;X;X;X	XXXXXXXXPPPPPPPPPPPPPPPPPPPPPPP	VVM(0.001)ALGD(0.153)Y(0.693)M(0.153)GASCHACIGGTNVR	VVM(-28.86)ALGD(-6.57)Y(6.57)M(-6.57)GAS(-33.53)C(-39.6)H(-52.65)AC(-76.1)IGGT(-98.08)N(-97.85)VR(-99.91)	8	3	-1.703			By MS/MS	172290000	172290000	0	0	2.6162	0	0	172290000	0	0	NaN
Q53SS8;Q15365	183;183	Q53SS8	Q53SS8	Poly(rC)-binding protein 1	PCBP1		0.951486	16.0473	2.69422e-16	109.85	83.913	109.85	0.476811	0	6.13508e-11	99.569	0.951486	16.0473	2.69422e-16	109.85	0.479182	0	8.51653e-11	96.848		1	Y	ETLSQSPQGRVMTIPYQPMPASSPVICAGGQ	X;X;X;X;X;X;X;X;X;X;X;X;X;X;X;B2;X;X;X;X;X;X;X;X;X;X;X;X;X;X;X	XXXXXXXXXXPPPPPPPPPPPPPPPPPPPPP	VM(0.001)T(0.02)IPY(0.951)Q(0.024)PM(0.005)PASSPVICAGGQDR	VM(-31.5)T(-16.85)IPY(16.05)Q(-16.05)PM(-23.23)PAS(-58.82)S(-64.9)PVIC(-75.84)AGGQ(-87.73)D(-87.73)R(-93.55)	6	3	-1.4109		By MS/MS		103730000	103730000	0	0	4.5228	0	103730000	0	NaN	9.3502	0
F8VX55;A0A024R120;Q12800;F8VWL0;Q5JV87;Q9NZI6	131;131;131;33;111;111	F8VX55	F8VX55	Alpha-globin transcription factor CP2;Transcription factor CP2-like protein 1	TFCP2;DKFZp564C0164;TFCP2L1		0.980647	19.3363	2.93591e-16	148.18	130.32	148.18	0.966863	16.9775	5.52686e-12	118.87	0.964203	15.3277	6.05675e-12	117.95	0.980647	19.3363	2.93591e-16	148.18		1	Y	VKSIFRVVFHDRRLQYTEHQQLEGWRWNRPG	X;X;X;X;X;X;X;X;X;X;X;X;X;X;X;B2;X;X;X;X;X;X;X;X;X;X;X;X;X;X;X	XXXXXXXXXXXXXPPPPPPPPPPPPPXXXXX	LQ(0.008)Y(0.981)T(0.011)EHQQLEGWR	LQ(-21.01)Y(19.34)T(-19.34)E(-38.11)H(-56.22)Q(-75.89)Q(-100.47)LE(-127.12)GW(-137.54)R(-141.71)	3	3	-0.14441	By MS/MS	By MS/MS	By MS/MS	114020000	114020000	0	0	NaN	32248000	34166000	47608000	NaN	NaN	NaN
A0A024R228;P61978;B3KU16;B4DUQ1;Q5EC54;B4DFF1	449;449;209;425;449;444	A0A024R228;B4DUQ1;Q5EC54	A0A024R228	Heterogeneous nuclear ribonucleoprotein K	HNRPK;HNRNPK		0.967683	14.8484	3.4242e-16	107.78	80.284	107.78	0.933298	15.7915	3.79261e-16	106.73	0.967683	14.8484	3.4242e-16	107.78	0.717308	7.20165	6.62364e-05	60.747		1	Y	IITITGTQDQIQNAQYLLQNSVKQYADVEGF;IITITGTQDQIQNAQYLLQNSVKQYSGKFF_	X;X;X;X;X;X;X;X;X;X;X;X;X;X;X;B2;X;X;X;X;X;X;X;B2;X;X;X;X;X;X;X	PPPPPPPPPPPPPPPPPPPPPPPXXXXXXXX	IITITGTQDQIQNAQ(0.032)Y(0.968)LLQNSVK	IIT(-67.64)IT(-55.33)GT(-55.33)Q(-60.83)D(-66.16)Q(-67.16)IQ(-48.44)N(-35.21)AQ(-14.85)Y(14.85)LLQ(-35.21)N(-47.75)S(-54.2)VK(-53.12)	16	3	2.1062	By MS/MS	By MS/MS	By MS/MS	13047000000	13047000000	0	0	4.9434	4093900000	5476900000	1190900000	50.448	3.9133	1.0279
A0A0S2Z3K9;I3L297;L7RT18;A0A0S2Z3Q4;P46108	108;108;108;108;108	A0A0S2Z3K9;L7RT18	L7RT18	Adapter molecule crk	CRK		0.934817	12.0728	3.57894e-16	125.73	95.96	125.73	0.890456	10.0287	3.11629e-06	97.911	0.919391	11.5716	5.07629e-09	112.13	0.934817	12.0728	3.57894e-16	125.73		1	Y	EFDSLPALLEFYKIHYLDTTTLIEPVSRSRQ	X;X;X;X;X;X;X;X;X;X;X;X;X;X;X;B2;X;X;X;X;X;X;X;X;X;X;X;X;X;X;X	XXXXXXXXXXXXXPPPPPPPPPPPPPPPXXX	IH(0.058)Y(0.935)LD(0.007)TTTLIEPVSR	IH(-12.07)Y(12.07)LD(-21.18)T(-42.8)T(-55.35)T(-60.93)LIE(-96.09)PVS(-117.95)R(-117.75)	3	3	1.4369	By MS/MS	By MS/MS	By MS/MS	888610000	888610000	0	0	20.196	165630000	208770000	216820000	22.49	22.808	7.8896
E7EQ69;Q9GZZ1	82;83	E7EQ69	E7EQ69	N-alpha-acetyltransferase 50	NAA50		0.915584	10.3531	4.86878e-16	143.04	109.92	126.07	0.915584	10.3531	2.32075e-12	126.07	0.895676	9.33774	7.4504e-15	134.26	0.887863	8.98597	4.86878e-16	143.04		1	Y	NQKRLYIMTLGCLAPYRRLGIGTKMLNHVLN	X;X;X;X;X;X;X;X;X;X;X;X;X;X;X;B2;X;X;X;X;X;X;X;X;X;X;X;X;X;X;X	XXXXPPPPPPPPPPPPPXXXXXXXXXXXXXX	LYIMTLGCLAPY(0.916)R(0.084)	LY(-123.33)IM(-96.59)T(-88.88)LGC(-50.69)LAPY(10.35)R(-10.35)	12	2	-0.84606	By MS/MS	By MS/MS	By MS/MS	354390000	354390000	0	0	NaN	143600000	117300000	93487000	NaN	NaN	NaN
A0A024R1U2;Q7RTV0	54;54	A0A024R1U2	A0A024R1U2	PHD finger-like domain-containing protein 5A	PHF5A		0.834057	10.3448	4.98862e-16	148.32	140.78	148.32	0.73449	7.7912	0.000559662	59.067					0.834057	10.3448	4.98862e-16	148.32		1	Y	PCTLVRICDECNYGSYQGRCVICGGPGVSDA	X;X;X;X;X;X;X;X;X;X;X;X;X;X;X;B2;X;X;X;X;X;X;X;X;X;X;X;X;X;X;X	XXXXXXPPPPPPPPPPPPPXXXXXXXXXXXX	ICDECNYGS(0.077)Y(0.834)Q(0.077)GR(0.012)	IC(-140.1)D(-126.64)E(-116.69)C(-95.83)N(-79.66)Y(-61.42)GS(-10.34)Y(10.34)Q(-10.34)GR(-18.47)	10	2	-0.63672	By MS/MS		By MS/MS	262880000	262880000	0	0	2.563	50288000	0	212590000	2.1972	0	5.837
A8K4T6;Q16401	478;478	A8K4T6	A8K4T6	26S proteasome non-ATPase regulatory subunit 5	PSMD5		0.98215	19.2119	6.2028e-16	156.35	124.13	156.35	0.768944	7.308	1.32293e-08	116.05	0.766004	7.39497	0.000133632	78.548	0.98215	19.2119	6.2028e-16	156.35		1	Y	LANSKTIAEIFGNPNYLRLRTYLSEGPYYVK	X;X;X;X;X;X;X;X;X;X;X;X;X;X;X;B2;X;X;X;X;X;X;X;X;X;X;X;X;X;X;X	XXXXXPPPPPPPPPPPPPXXXXXXXXXXXXX	TIAEIFGNPN(0.006)Y(0.982)LR(0.012)	T(-153.05)IAE(-130.96)IFGN(-63.17)PN(-22.09)Y(19.21)LR(-19.21)	11	2	2.9795	By MS/MS	By MS/MS	By MS/MS	369690000	369690000	0	0	NaN	27520000	70453000	80552000	NaN	NaN	NaN
Q6IPT9;Q6IPS9;Q53HR5;Q53HQ7;Q53HM9;Q53G85;P68104;A0A4D5RAC9;A8K9C4;Q6IPN6;Q53GA1;A0A4D5RAC7;Q53GE9;Q5VTE0;Q96RE1;A0A4D5RAE2;A0A4D5RAN2;A0A087WVQ9;B4DV42;A0A4D5RBG5;A0A4D5RA98;A0A4D5RA76;B4DNE0;A0A4D5RA52;A0A087WV01;Q9H2I7;Q9NZS6;Q16577;A0A4D5RA61;A0A4D5RAF1;A9X7H1;A0A4D5RBK4;A0A4D5RA69;A0A4D5RAA9;Q5JR01;A6PW80	85;85;85;85;85;85;85;85;85;85;85;85;85;85;21;22;85;85;37;85;85;85;85;85;85;85;49;21;85;85;1;85;85;85;85;85	Q6IPT9	Q6IPT9	Elongation factor 1-alpha;Elongation factor 1-alpha 1;Putative elongation factor 1-alpha-like 3	EEF1A1;EEF1A1P5;EEF1A1L14;PTI-1		0.834451	7.02689	1.11183e-15	169.92	149.62	87.258	0.499969	0	2.8218e-11	121.73	0.67399	3.15422	1.11183e-15	169.92	0.834451	7.02689	3.01801e-14	136.63		1	Y	GITIDISLWKFETSKYYVTIIDAPGHRDFIK	X;X;X;X;X;X;X;X;X;X;X;X;X;X;X;B2;X;X;X;X;X;X;X;X;X;X;X;X;X;X;X	XXXXXXXXXXXXXXXPPPPPPPPPPPPXXXX	Y(0.834)Y(0.165)VTIIDAPGHR	Y(7.03)Y(-7.03)VT(-40.07)IID(-66.56)APGH(-82.96)R(-87.26)	1	2	0.19912	By MS/MS	By MS/MS	By MS/MS	2044200000	2044200000	0	0	1.281	397470000	479950000	736760000	0.74665	0.92208	1.3572
Q6NTA2;A0A384N6C7;P14866;B2R959;M0QXS5;A0A3B3ITJ4	370;387;387;356;328;335	Q6NTA2	Q6NTA2	Heterogeneous nuclear ribonucleoprotein L	HNRNPL		0.877661	12.8216	1.72076e-15	74.05	66.153	74.05	0	0		NaN	0.816393	12.2269	5.97993e-11	61.228	0.877661	12.8216	1.72076e-15	74.05		1	Y	PPEYGPHADSPVLMVYGLDQSKMNCDRVFNV	X;X;X;X;X;X;X;X;X;X;X;X;X;X;X;B2;X;X;X;X;X;X;X;X;X;X;X;X;X;X;X	PPPPPPPPPPPPPPPPPPPPPPXXXXXXXXX	YGPQYGHPPPPPPPPE(0.001)Y(0.001)GPH(0.001)AD(0.001)S(0.001)PVLM(0.039)VY(0.878)GLD(0.046)Q(0.01)S(0.012)K(0.013)	Y(-70.05)GPQ(-70.05)Y(-68.8)GH(-68.93)PPPPPPPPE(-32.3)Y(-32.3)GPH(-32.3)AD(-32.3)S(-32.3)PVLM(-13.52)VY(12.82)GLD(-12.82)Q(-19.35)S(-18.68)K(-18.35)	29	4	3.799	By matching	By MS/MS	By MS/MS	412490000	412490000	0	0	1.0606	83015000	129540000	141510000	0.73356	0.90009	1.0733
A0A024RAZ7;P09651;F8W6I7;A0A024RB53;Q6IPF2;A0A024RC46;Q9BSM5;Q0VAC0;F8VZ49;F8VTQ5;H0YH80;A0A2R8Y4L2;Q3MI39	167;167;167;167;167;167;145;167;186;118;38;122;14	A0A024RAZ7	A0A024RAZ7	Heterogeneous nuclear ribonucleoprotein A1;Heterogeneous nuclear ribonucleoprotein A1, N-terminally processed	HNRPA1;HNRNPA1;hCG_2020860		0.998489	28.2019	2.10662e-15	158.3	138.1	158.3	0.998231	27.5153	2.10662e-15	147.26	0.983385	17.7231	9.16941e-14	133.05	0.998489	28.2019	2.79132e-15	158.3		1	Y	TFDDHDSVDKIVIQKYHTVNGHNCEVRKALS	X;X;X;X;X;X;X;X;X;X;X;X;X;X;X;B2;X;X;X;X;X;X;X;X;X;X;X;X;X;X;X	XXXXXXXXXXXXXXXPPPPPPPPPPPPXXXX	Y(0.998)H(0.002)TVNGHNCEVR	Y(28.2)H(-28.2)T(-64.46)VN(-113.59)GH(-135.52)N(-144.06)C(-150.96)E(-152.98)VR(-157.73)	1	3	0.2142	By MS/MS	By MS/MS	By MS/MS	2469200000	2469200000	0	0	60.938	403440000	528590000	570390000	NaN	15.287	96.002
A0A024R819;A0A024R858;P36639;C9J361	7;30;48;7	A0A024R819	A0A024R819	7,8-dihydro-8-oxoguanine triphosphatase	NUDT1		0.999126	30.5822	3.62105e-15	149.94	129.07	117.89	0.910509	10.075	2.65273e-11	122.13	0.999126	30.5822	4.43766e-11	117.89	0.897758	9.43532	3.62105e-15	149.94		1	Y	_________MGASRLYTLVLVLQPQRVLLGM	X;X;X;X;X;X;X;X;X;X;X;X;X;X;X;B2;X;X;X;X;X;X;X;X;X;X;X;X;X;X;X	XXXXXXXXXXXXXXPPPPPPPPPPPPXXXXX	LY(0.999)T(0.001)LVLVLQPQR	LY(30.58)T(-30.58)LVLVLQ(-103.22)PQ(-113.59)R(-117.89)	2	2	0.98946	By MS/MS	By MS/MS	By MS/MS	179060000	179060000	0	0	NaN	25325000	36137000	66301000	NaN	NaN	NaN
J3KTL2;Q07955;Q59FA2;A8K1L8;J3KSR8;A0A2I7N9Y9;B7Z570	153;153;185;153;48;19;48	J3KTL2	J3KTL2	Serine/arginine-rich splicing factor 1	SRSF1		0.932656	11.4163	3.62332e-15	159.79	144.42	150.08	0.911343	10.1207	4.3999e-15	155.84	0.932656	11.4163	3.62332e-15	150.08	0.89965	9.52573	4.94671e-15	159.79		1	Y	KDHMREAGDVCYADVYRDGTGVVEFVRKEDM	X;X;X;X;X;X;X;X;X;X;X;X;X;X;X;B2;X;X;X;X;X;X;X;X;X;X;X;X;X;X;X	XXXXXPPPPPPPPPPPPPPPPPPPPPPXXXX	EAGDVCYADVY(0.933)R(0.067)	E(-145.78)AGD(-134.07)VC(-94.17)Y(-73.73)AD(-44.55)VY(11.42)R(-11.42)	11	2	-0.25612	By MS/MS	By MS/MS	By MS/MS	1032200000	1032200000	0	0	1.9915	307680000	410500000	313980000	1.8661	2.2243	1.8596
A0A2U3TZH3;Q05639;Q59GP5;A0A2R8Y488;A0A2R8Y660;Q6IPT9;Q6IPS9;Q53HR5;Q53HQ7;Q53HM9;Q53G85;P68104;A0A4D5RAC9;A8K9C4;Q6IPN6;Q53GA1;A0A4D5RAC7;Q53GE9;Q5VTE0;Q96RE1;A0A4D5RAE2;A0A4D5RAN2;B4DV42;A0A4D5RBG5;Q8IUB0;Q53HR1;A0A4D5RA98;A0A4D5RA76;Q53G89;A0A4D5RA52;A0A087WV01;Q9H2I7;Q9NZS6;Q16577;A0A4D5RA61;A0A4D5RAF1;A0A4D5RBI9;A9X7H1;A0A4D5RBK4	141;141;117;141;141;141;141;141;141;141;141;141;141;141;141;141;141;141;141;77;78;141;93;141;40;45;141;141;112;141;141;141;105;77;141;141;131;57;141	A0A2U3TZH3;Q6IPT9	Q6IPT9	Elongation factor 1-alpha 2;Elongation factor 1-alpha;Elongation factor 1-alpha 1;Putative elongation factor 1-alpha-like 3	EEF1A2;EEF1A1;EEF1A1P5;EEF1A1L14;PTI-1		0.86454	8.1811	3.67487e-15	150.61	125.44	150.61	0.859014	8.1811	3.67487e-15	150.61	0.823139	6.71333	0.000143943	85.622	0.86454	8.1811	3.67487e-15	150.61		1	Y	GISKNGQTREHALLAYTLGVKQLIVGVNKMD	X;X;X;X;X;X;X;X;X;X;X;X;X;X;X;B2;X;X;X;X;X;X;X;X;X;X;X;X;X;X;X	XXXXXXXXXPPPPPPPPPPPPXXXXXXXXXX	EHALLAY(0.865)T(0.131)LGVK(0.004)	E(-134.47)H(-134.47)ALLAY(8.18)T(-8.18)LGVK(-23.31)	7	2	0.41119	By MS/MS	By MS/MS	By MS/MS	6625500000	6625500000	0	0	7.2738	1259000000	1700100000	2285500000	13.367	4.6739	5.0461
P22626;A0A384NL58;A0A087WUI2;A0A024RA28;I6L957	174;174;174;122;162	P22626	P22626	Heterogeneous nuclear ribonucleoproteins A2/B1	HNRNPA2B1;HNRPA2B1		0.998151	27.3251	5.06108e-15	161.94	140.12	105.65	0.998151	27.3251	5.06108e-15	150.06	0.987743	19.0628	1.70929e-14	138.45	0.993054	21.5525	6.68543e-15	161.94		1	Y	TFDDHDPVDKIVLQKYHTINGHNAEVRKALS	X;X;X;X;X;X;X;X;X;X;X;X;X;X;X;B2;X;X;X;X;X;X;X;X;X;X;X;X;X;X;X	XXXXXXXXXXXXXXXPPPPPPPPPPPPXXXX	Y(0.998)H(0.002)TINGHNAEVR	Y(27.33)H(-27.33)T(-60.37)IN(-85.52)GH(-95)N(-98.96)AE(-100.47)VR(-105.65)	1	3	-0.33139	By MS/MS	By MS/MS	By MS/MS	2449000000	2449000000	0	0	5.6531	493840000	658720000	570920000	5.9642	4.3045	2.8923
Q8WVW5;Q53G99;Q1KLZ0;P63261;P60709;B4E335;B4E3A4;Q53GK6;Q53G76;B4DVQ0;B4DW52;B3KWQ3;Q6PJ43;B7ZAP6;Q96FU6;V9HVZ7;Q96DE1;A0A2R8YFE2;L0R5C4;Q9BYX7;Q6S8J3;A5A3E0;P0CG38;P0CG39	350;362;362;362;362;338;343;362;362;320;334;240;250;281;152;210;146;66;433;362;1062;1062;1062;1025	Q8WVW5;Q6S8J3	Q8WVW5	Actin, cytoplasmic 2;Actin, cytoplasmic 2, N-terminally processed;Actin, cytoplasmic 1;Actin, cytoplasmic 1, N-terminally processed;Putative beta-actin-like protein 3;Putative beta-actin-like protein 3, N-terminally processed;POTE ankyrin domain family member E;POTE ankyrin domain family member F;POTE ankyrin domain family member I;POTE ankyrin domain family member J	PS1TP5BP1;ACTG1;ACTB;HEL-176;POTEM;POTEKP;POTEE;POTEF;POTEI;POTEJ		0.552158	4.09142	7.47999e-15	130.44	115.87	130.44	0.535265	3.87015	7.82744e-06	102.28	0.513497	3.37345	5.12808e-08	107.97	0.552158	4.09142	7.47999e-15	130.44		1	Y	ASLSTFQQMWISKQEYDESGPSIVHRKCF__	X;X;X;X;X;X;X;X;X;X;X;X;X;X;X;B2;X;X;X;X;X;X;X;X;X;X;X;X;X;X;X	XXXXXXXXXXXXXPPPPPPPPPPPPPXXXXX	Q(0.215)E(0.215)Y(0.552)D(0.017)ESGPSIVHR	Q(-4.09)E(-4.09)Y(4.09)D(-15.11)E(-32.28)S(-48.81)GPS(-100.43)IVH(-127.12)R(-129.4)	3	3	-0.06195	By MS/MS	By MS/MS	By MS/MS	5284600000	5284600000	0	0	0.96682	1877500000	2088500000	1318600000	1.618	0.83108	0.73558
H0YN26;Q6PKH8;Q08AJ6;A0A384P5U2;P39687;Q53F35;Q92688	148;148;148;148;148;148;148	H0YN26;Q53F35	Q53F35	Acidic leucine-rich nuclear phosphoprotein 32 family member A;Acidic leucine-rich nuclear phosphoprotein 32 family member B	ANP32A;ANP32B		0.552594	1.37867	1.01157e-14	132.32	107.98	132.32	0	0		NaN	0.552594	1.37867	1.01157e-14	132.32	0.419802	0	0.0114406	41.704		1	Y	ENVFKLLPQLTYLDGYDRDDKEAPDSDAEGY;ESVFKLLPQLTYLDGYDREDQEAPDSDAEVD	X;X;X;X;B2;X;X;X;X;X;X;X;X;X;X;B2;X;X;X;X;X;X;X;X;X;X;X;X;X;X;X	XXXXXPPPPPPPPPPPPPXXXXXXXXXXXXX	LLPQLTYLD(0.012)GY(0.553)D(0.402)R(0.033)	LLPQ(-107.81)LT(-77.83)Y(-59.67)LD(-16.62)GY(1.38)D(-1.38)R(-12.23)	11	2	-0.88513		By MS/MS		157630000	157630000	0	0	1.201	0	157630000	0	0	3.212	0
M0R117;B4DM74;Q02543;B2R4C0;Q32XH3;M0R3D6;M0R1A7;M0R0P7	110;110;110;110;110;81;81;71	M0R117	M0R117	60S ribosomal protein L18a	RPL18A		0.878008	8.91017	1.27333e-14	130.41	106.42	130.41	0.878008	8.91017	1.27333e-14	130.41	0	0		NaN	0.591696	2.44811	3.53823e-11	121.6		1	Y	REYRDLTTAGAVTQCYRDMGARHRARAHSIQ	X;X;X;X;X;X;X;X;X;X;X;X;X;X;X;B2;X;X;X;X;X;X;X;X;X;X;X;X;X;X;X	XXXXPPPPPPPPPPPPPXXXXXXXXXXXXXX	DLTTAGAVTQC(0.009)Y(0.878)R(0.113)	D(-127.29)LT(-119.66)T(-103.52)AGAVT(-56.53)Q(-38.75)C(-19.88)Y(8.91)R(-8.91)	12	2	0.13065	By MS/MS		By MS/MS	25379000	25379000	0	0	0.46207	25379000	0	0	1.6169	0	0
A0A2U3TZH3;Q05639;Q59GP5;A0A2R8Y488;A0A2R8Y660;A0A2R8YDN5	85;85;61;85;85;85	A0A2U3TZH3	A0A2U3TZH3	Elongation factor 1-alpha 2	EEF1A2		0.499997	0	2.15482e-14	135.99	115.43	135.99	0.499993	0	5.74739e-14	129.82	0.499986	0	6.74413e-12	125.72	0.499997	0	2.15482e-14	135.99		1	Y	GITIDISLWKFETTKYYITIIDAPGHRDFIK	X;X;X;X;X;X;X;X;X;X;X;X;X;X;X;B2;X;X;X;X;X;X;X;X;X;X;X;X;X;X;X	XXXXXXXXXXXXXXXPPPPPPPPPPPPXXXX	Y(0.5)Y(0.5)ITIIDAPGHR	Y(0)Y(0)IT(-48.8)IID(-106.92)APGH(-132.67)R(-134.52)	1	3	-0.67888	By MS/MS	By MS/MS	By MS/MS	138540000	138540000	0	0	7.7268	51699000	39148000	47693000	10.361	5.5369	8.1251
A0A2U3TZH3;Q05639;Q59GP5;A0A2R8Y488;A0A2R8Y660;A0A2R8YDN5	86;86;62;86;86;86	A0A2U3TZH3	A0A2U3TZH3	Elongation factor 1-alpha 2	EEF1A2		0.499997	0	2.15482e-14	135.99	115.43	135.99	0.499993	0	5.74739e-14	129.82	0.499986	0	6.74413e-12	125.72	0.499997	0	2.15482e-14	135.99		1	Y	ITIDISLWKFETTKYYITIIDAPGHRDFIKN	X;X;X;X;X;X;X;X;X;X;X;X;X;X;X;X;X;X;X;X;X;X;X;X;X;X;X;X;X;X;X	XXXXXXXXXXXXXXXXXXXXXXXXXXXXXXX	Y(0.5)Y(0.5)ITIIDAPGHR	Y(0)Y(0)IT(-48.8)IID(-106.92)APGH(-132.67)R(-134.52)	2	3	-0.67888	By MS/MS	By MS/MS	By MS/MS	138540000	138540000	0	0	7.7268	51699000	39148000	47693000	10.361	5.5369	8.1251
Q9ULC4	124	Q9ULC4	Q9ULC4	Malignant T-cell-amplified sequence 1	MCTS1		0.999983	48.3639	2.44951e-14	119.45	90.287	119.45									0.999983	48.3639	2.44951e-14	119.45		1	Y	ANIMCPGLTSPGAKLYPAAVDTIVAIMAEGK	X;X;X;X;X;X;X;X;X;X;X;X;X;X;X;B2;X;X;X;X;X;X;X;X;X;X;X;X;X;X;X	XXXXXXXXXXXXXXPPPPPPPPPPPPPPPPP	LY(1)PAAVDTIVAIMAEGK	LY(48.36)PAAVD(-48.36)T(-55.98)IVAIM(-105.44)AE(-114.06)GK(-119.45)	2	2	0.15427			By MS/MS	163320000	163320000	0	0	NaN	0	0	163320000	NaN	NaN	NaN
O43324;H0YAL7;D6RBD7;C9J1V9;D6RCQ0	77;64;77;77;89	O43324	O43324	Eukaryotic translation elongation factor 1 epsilon-1	EEF1E1;EEF1E1-BLOC1S5		0.917981	11.0937	2.6852e-14	186.76	142.01	166.16					0.917981	11.0937	9.72785e-10	166.16	0.893958	10.161	2.6852e-14	186.76		1	Y	GSTAEEKAIVQQWLEYRVTQVDGHSSKNDIH	X;X;X;X;X;X;X;X;X;X;X;X;X;X;X;B2;X;X;X;X;X;X;X;X;X;X;X;X;X;X;X	XXXXXXXPPPPPPPPPPXXXXXXXXXXXXXX	AIVQQWLE(0.011)Y(0.918)R(0.071)	AIVQ(-128.43)Q(-103.62)W(-83.71)LE(-19.35)Y(11.09)R(-11.09)	9	2	-0.56097		By MS/MS	By MS/MS	202590000	202590000	0	0	6.1848	0	95825000	106760000	0	6.8273	NaN
Q8NBS9;Q658S9;Q86UY0;Q6EHZ3;A0A024QZV0	251;211;179;182;143	Q8NBS9	Q8NBS9	Thioredoxin domain-containing protein 5	TXNDC5;DKFZp666I134;STRF8;hCG_1811539		0.940531	13.6205	4.43319e-14	124.06	115.68	124.06	0.500897	5.71783	0.00105538	42.314	0.844003	14.0582	4.17222e-06	80.917	0.940531	13.6205	4.43319e-14	124.06		1	Y	HSETVKIGKVDCTQHYELCSGNQVRGYPTLL	X;X;X;X;X;X;X;X;X;X;X;X;X;X;X;B2;X;X;X;X;X;X;X;X;X;X;B2;X;X;X;X	XXXXXXXXXPPPPPPPPPPPPPPPPXXXXXX	VDCT(0.002)Q(0.002)H(0.041)Y(0.941)E(0.015)LCSGNQVR	VD(-46.46)C(-37.06)T(-27.42)Q(-26.89)H(-13.62)Y(13.62)E(-18.12)LC(-35.82)S(-48.59)GN(-68.31)Q(-80.75)VR(-101.92)	7	2	-0.32829	By MS/MS	By MS/MS	By MS/MS	1302000000	1302000000	0	0	205.64	13063000	108040000	202570000	9.7767	62.499	62.006
E9KL35;P63244;J3KPE3;H0YAF8;H0Y8W2;H0YAM7;D6RHH4;D6R9Z1;D6R9L0;D6RFX4;B4DVD2;D6RBD0;D6RFZ9	140;140;96;58;71;47;140;126;188;99;111;116;180	E9KL35	E9KL35	Guanine nucleotide-binding protein subunit beta-2-like 1;Guanine nucleotide-binding protein subunit beta-2-like 1, N-terminally processed	GNB2L1		0.499984	0	4.86888e-14	120.29	114.21	120.29	0.499984	0	4.86888e-14	120.29	0.463886	0	3.00325e-06	77.191	0.498464	0	3.78617e-06	88.427		1	Y	RDKTIKLWNTLGVCKYTVQDESHSEWVSCVR	X;X;X;X;X;X;X;X;X;X;X;X;X;X;X;B2;X;X;X;X;X;X;X;X;X;X;X;X;X;X;X	XXXXXXXXXXXXXXXPPPPPPPPPPPPPPPP	Y(0.5)T(0.5)VQDESHSEWVSCVR	Y(0)T(0)VQ(-43.5)D(-47.82)E(-58.67)S(-68.97)H(-84.26)S(-99.05)E(-109.34)W(-111.67)VS(-118.23)C(-119.74)VR(-120.29)	1	3	-1.134	By MS/MS			71446000	71446000	0	0	0.14025	71446000	0	0	0.48281	0	0
F2Z2V0;B0QZ18;Q99829;A6PVH9;E7ENH5;Q59EI4;Q5JX45;H0Y524	386;391;386;386;386;366;362;25	F2Z2V0	F2Z2V0	Copine-1	CPNE1		0.999776	36.6527	5.54152e-14	119.17	98.587	119.17	0.999776	36.6527	5.54152e-14	119.17	0.996284	25.6659	2.26972e-06	74.853	0.800007	6.7996	0.000537873	48.177		1	Y	GIVDAYRQALPQVRLYGPTNFAPIINHVARF	X;X;X;X;X;X;X;X;X;X;X;X;X;X;X;B2;X;X;X;X;X;X;X;X;X;X;X;X;X;X;X	XXXXXXXXXXXXXXPPPPPPPPPPPPPPPPX	LY(1)GPTNFAPIINHVAR	LY(36.65)GPT(-36.65)N(-50.91)FAPIIN(-113.7)H(-117.78)VAR(-119.17)	2	3	1.0366	By MS/MS	By MS/MS	By MS/MS	854330000	854330000	0	0	NaN	163840000	214260000	300100000	NaN	NaN	NaN
A0A024QZ30;P31040;D6RFM5;A0A087X1I3;B4DYN5;A0A494C1T6	55;55;55;55;55;55	A0A024QZ30	A0A024QZ30	Succinate dehydrogenase [ubiquinone] flavoprotein subunit, mitochondrial	SDHA		0.728689	7.65324	7.39886e-14	102.97	87.58	102.97	0.213541	0	1.96176e-06	60.95	0.315166	0	3.70049e-07	74.525	0.728689	7.65324	7.39886e-14	102.97		1	Y	NKRASAKVSDSISAQYPVVDHEFDAVVVGAG	X;X;X;X;X;X;X;X;X;X;X;X;X;X;X;B2;X;X;X;X;X;X;X;X;X;X;X;X;X;X;X	XXXXXXXPPPPPPPPPPPPPPPPPPPPPPPP	VS(0.001)D(0.001)S(0.005)IS(0.125)AQ(0.125)Y(0.729)PVVD(0.011)H(0.003)EFDAVVVGAGGAGLR	VS(-27.44)D(-28.07)S(-21.66)IS(-7.65)AQ(-7.65)Y(7.65)PVVD(-18.29)H(-24.21)E(-36.96)FD(-60.18)AVVVGAGGAGLR(-100.82)	9	3	-0.12125			By MS/MS	124690000	124690000	0	0	0.50111	0	0	124690000	0	0	1.0728
Q0VAS5;B2R4R0;P62805	89;89;89	Q0VAS5	Q0VAS5	Histone H4	HIST1H4H;HIST1H4A		0.997976	28.076	8.08032e-14	131.52	100.09	81.676	0.993515	21.8529	8.08032e-14	131.52	0.997976	28.076	4.11943e-08	112.71	0.989813	21.461	6.00044e-06	104.39		1	Y	TEHAKCKTVTAMDVVYALKRQGRTLYGFGG_	X;X;B2;X;X;X;X;X;X;X;X;X;X;X;X;B2;X;X;X;X;X;X;X;X;X;B2;X;X;X;X;X	XXXXXXXPPPPPPPPPPPPPXXXXXXXXXXX	TVTAMDVVY(0.998)ALK(0.002)R	T(-67.32)VT(-54.01)AM(-46.78)D(-41.61)VVY(28.08)ALK(-28.08)R(-34.25)	9	3	-0.67503	By MS/MS	By MS/MS	By MS/MS	5047700000	5047700000	0	0	20.163	1421600000	1827500000	777800000	25.324	19.18	7.8628
P49137	128	P49137	P49137	MAP kinase-activated protein kinase 2	MAPKAPK2		0.994126	23.4505	8.93182e-14	130.66	89.208	130.66	0.96597	15.9122	1.5375e-08	115.71	0.994126	23.4505	8.93182e-14	130.66	0.961176	15.2757	5.06857e-08	111.61		1	Y	QCPHIVRIVDVYENLYAGRKCLLIVMECLDG	X;X;X;X;X;X;X;X;X;X;X;X;X;X;X;B2;X;X;X;X;X;X;X;X;X;X;X;X;X;X;X	XXXXXXXPPPPPPPPPPPPXXXXXXXXXXXX	IVDVYEN(0.004)LY(0.994)AGR(0.001)	IVD(-101.96)VY(-67.58)E(-51.72)N(-23.45)LY(23.45)AGR(-28.59)	9	2	-0.10339	By MS/MS	By MS/MS	By MS/MS	169260000	169260000	0	0	NaN	47250000	52998000	42888000	NaN	NaN	NaN
M0QYA2;A0A024QZE9;Q9NWS0;M0R2P8;M0R3A4	183;194;194;75;120	M0QYA2	M0QYA2	PIH1 domain-containing protein 1	PIH1D1;FLJ20643		0.986546	19.3182	1.06874e-13	128.01	92.071	128.01	0.889667	9.78843	0.000101028	88.441	0.858421	8.42417	9.02189e-05	89.403	0.986546	19.3182	1.06874e-13	128.01		1	Y	IRSEQRPRIQELGDLYTPAPGRAESGPEKPH	X;X;X;X;X;X;X;X;X;X;X;X;X;X;X;B2;X;X;X;X;X;X;X;X;X;X;X;X;X;X;X	XXXXXXXXPPPPPPPPPPPPPPXXXXXXXXX	IQELGD(0.002)LY(0.987)T(0.012)PAPGR	IQ(-92.47)E(-57.99)LGD(-27.14)LY(19.32)T(-19.32)PAPGR(-57.07)	8	2	-1.0712	By MS/MS	By MS/MS	By MS/MS	112360000	112360000	0	0	NaN	33383000	31957000	47021000	NaN	NaN	NaN
B4DLR3;Q00839;B3KX72;Q96BA7;A0A1W2PP35;A0A1X7SBS1;A0A1W2PPS1;Q5RI18;A0A1W2PPL4;A0A1W2PPH7;Q7Z4Q5;A0A1W2PQL0;A0A1W2PP34;A0A1W2PQ74;A0A1W2PRZ7;A0A1W2PQD4	484;525;450;422;428;444;506;302;247;249;213;229;249;249;186;51	B4DLR3	B4DLR3	Heterogeneous nuclear ribonucleoprotein U	HNRNPU;HNRPU		0.775562	5.38521	1.11195e-13	128.44	91.415	123.62	0.775562	5.38521	2.02898e-11	123.62	0.775562	5.38521	2.02898e-11	123.62	0.720402	4.1104	1.11195e-13	128.44		1	Y	KTTWVTKHAAENPGKYNILGTNTIMDKMMVA	X;X;X;X;X;X;X;B2;X;X;X;X;X;X;X;B2;X;X;X;X;X;X;X;X;X;X;X;X;X;X;X	XXXXXXXXXXXXXXXPPPPPPPPPPPPXXXX	Y(0.776)N(0.224)ILGTNTIMDK	Y(5.39)N(-5.39)ILGT(-88.44)N(-96.95)T(-98.4)IM(-114.92)D(-120.48)K(-123.62)	1	2	-0.69587	By MS/MS	By MS/MS	By MS/MS	1349800000	1349800000	0	0	6.0477	268950000	297550000	527360000	4.6354	4.5379	5.2948
P0DP25;P0DP24;P0DP23;B4DJ51;B2RDW0;E7EMB3;Q9BRL5;Q96HY3;G3V361;A0A590UJI2	100;100;100;100;100;147;100;64;64;64	P0DP25	P0DP25		CALM3;CALM2;CALM1		0.949835	14.172	1.25648e-13	118.76	93.904	90.412	0.949835	14.172	6.36874e-06	90.412	0.944145	12.4998	1.25648e-13	118.76	0.93373	13.3267	5.95177e-06	76.357		1	Y	EIREAFRVFDKDGNGYISAAELRHVMTNLGE	X;X;X;X;X;X;X;X;X;X;X;X;X;X;X;B2;X;X;X;X;X;X;X;X;X;X;X;X;X;X;X	XXXXXXXPPPPPPPPPPPPPPPPXXXXXXXX	VFDKDGN(0.013)GY(0.95)IS(0.036)AAE(0.001)LR	VFD(-54)K(-51.62)D(-47.6)GN(-18.78)GY(14.17)IS(-14.17)AAE(-28.99)LR(-47.99)	9	2	0.5357	By MS/MS	By MS/MS	By MS/MS	1418800000	1418800000	0	0	11.292	123270000	134810000	135540000	3.1703	3.6981	2.694
A0A024R8W0;P38919;I3L3H2;Q59GT8;Q5JWW0;E9PBH4;F8WE11;C9JUF0;J3KT04;J3QLN6;J3QKZ9;B4E102;J3KS93;E7EMV8;Q86WD0;P60842;A8K7F6;A8K088;J3KT12;Q59F68;J3QS69;J3KTB5;J3QL43;J3QR64;B4E047;E7EQG2;Q14240;J3KS25;J3QQP0;J3KSN7	54;54;54;40;49;49;50;49;49;12;12;32;32;49;39;48;48;48;48;46;48;32;48;59;48;49;49;46;48;32	A0A024R8W0;J3KT04;J3QLN6;P60842	P60842	Eukaryotic initiation factor 4A-III;Eukaryotic initiation factor 4A-III, N-terminally processed;Eukaryotic initiation factor 4A-I;Eukaryotic initiation factor 4A-II;Eukaryotic initiation factor 4A-II, N-terminally processed	DDX48;EIF4A3;DKFZp566L241;EIF4A2;EIF4A1		0.99842	28.0265	1.31877e-13	118.28	98.62	107.85	0.993126	21.9709	4.87748e-06	80.245	0.996605	25.1738	1.18605e-09	113.63	0.99842	28.0265	1.31877e-13	118.28		1	Y	____MNLSESLLRGIYAYGFEKPSAIQQRAI;SFDDMNLSESLLRGIYAYGFEKPSAIQQRAI;TFDTMGLREDLLRGIYAYGFEKPSAIQQRAI	X;X;X;X;X;X;X;X;X;X;X;X;X;X;X;B2;X;X;X;X;X;X;X;X;X;X;X;X;X;X;X	XXXXXXXXXXXXXPPPPPPPPPPPPPPPPXX	GIY(0.998)AY(0.002)GFEKPSAIQQR	GIY(28.03)AY(-28.03)GFE(-52.04)K(-60.29)PS(-83.56)AIQ(-104.62)Q(-104.53)R(-107.85)	3	2	-0.2601	By MS/MS	By MS/MS	By MS/MS	1655300000	1655300000	0	0	4.4291	309760000	432820000	498950000	2.9949	3.0732	3.8539
A0A024R8W0;P38919;I3L3H2;Q59GT8;Q5JWW0;E9PBH4;F8WE11;C9JUF0;J3KT04;J3QLN6;J3QKZ9;B4E102;J3KS93;E7EMV8;Q86WD0;P60842;A8K7F6;A8K088;J3KT12;Q59F68;J3QS69;J3KTB5;J3QL43;J3QR64;B4E047;E7EQG2;Q14240;J3KS25;J3QQP0;J3KSN7	56;56;56;42;51;51;52;51;51;14;14;34;34;51;41;50;50;50;50;48;50;34;50;61;50;51;51;48;50;34	A0A024R8W0;J3KT04;J3QLN6;P60842	P60842	Eukaryotic initiation factor 4A-III;Eukaryotic initiation factor 4A-III, N-terminally processed;Eukaryotic initiation factor 4A-I;Eukaryotic initiation factor 4A-II;Eukaryotic initiation factor 4A-II, N-terminally processed	DDX48;EIF4A3;DKFZp566L241;EIF4A2;EIF4A1		0.99112	24.1632	1.31877e-13	118.28	98.62	57.96	0.99112	24.1632	9.96667e-10	111.83	0.955915	15.5587	1.18605e-09	113.63	0.99112	24.1632	1.31877e-13	118.28		1	Y	__MNLSESLLRGIYAYGFEKPSAIQQRAILP;DDMNLSESLLRGIYAYGFEKPSAIQQRAILP;DTMGLREDLLRGIYAYGFEKPSAIQQRAIKQ	X;X;X;X;X;X;X;X;X;X;X;X;X;X;X;B2;X;X;X;X;X;X;X;X;X;X;X;X;X;X;X	XXXXXXXXXXXPPPPPPPPPPPPPPPPXXXX	GIY(0.002)AY(0.991)GFE(0.003)K(0.004)	GIY(-26.89)AY(24.16)GFE(-25.12)K(-24.16)	5	2	-1.4372	By MS/MS	By MS/MS	By MS/MS	3317400000	3317400000	0	0	8.8763	310330000	508980000	463020000	3.0004	3.614	3.5764
B2RBR9;Q14974;B7Z752	321;321;176	B2RBR9	B2RBR9	Importin subunit beta-1	KPNB1		0.5	0	4.02378e-13	122.18	80.751	105.25	0.5	0	4.02378e-13	122.18	0.5	0	9.04003e-07	105.25						1	Y	PPEHTSKFYAKGALQYLVPILTQTLTKQDEN	X;X;X;X;X;X;X;X;X;X;X;X;X;X;X;X;X;X;X;X;X;X;X;X;X;X;X;X;X;X;X	XXXXXXXXXXXXXXXXXXXXXXXXXXXXXXX	GALQ(0.5)Y(0.5)LVPILTQTLTK	GALQ(0)Y(0)LVPILT(-82.22)Q(-95.49)T(-97.84)LT(-102.23)K(-103.7)	5	2	-1.3909	By MS/MS	By MS/MS		298490000	298490000	0	0	0.92814	31082000	267400000	0	0.27085	4.509	0
H7C2W9;C9JU56;B7Z4E3;B2R4C1;B7Z4C8;P62899;Q76N53	91;103;103;103;103;103;25	H7C2W9	H7C2W9	60S ribosomal protein L31	RPL31		0.9938	22.049	8.47133e-13	125.23	104.92	118.28	0.9938	22.049	2.69103e-12	118.28	0.990305	20.0921	8.47133e-13	125.23	0.991789	20.8206	2.03181e-08	113.69		1	Y	LSRKRNEDEDSPNKLYTLVTYVPVTTFKIFF	X;X;X;X;X;X;X;X;X;X;X;X;X;X;X;B2;X;X;X;X;X;X;X;X;X;X;X;X;X;X;X	XXXXXXXXXXXXXXPPPPPPPPPPPPPPXXX	LY(0.994)T(0.006)LVTYVPVTTFK	LY(22.05)T(-22.05)LVT(-70.09)Y(-84.41)VPVT(-109.09)T(-103.86)FK(-112.18)	2	2	-1.4399	By MS/MS	By MS/MS	By MS/MS	810210000	810210000	0	0	5.1939	121020000	95622000	68134000	2.201	2.522	1.0799
A0A384MTL2;P37802;C9J5W6;Q9UI15	192;192;108;192	A0A384MTL2	A0A384MTL2	Transgelin-2;Transgelin-3	TAGLN2;TAGLN3		0.980325	17.2495	1.18399e-12	123.96	102.9	119.22	0.950961	15.5252	1.18399e-12	123.96	0.980325	17.2495	2.44019e-12	119.22	0.79026	5.9791	0.000142617	84.738		1	Y	QMGTNRGASQAGMTGYGMPRQIL________	X;X;X;X;X;X;X;X;X;X;X;X;X;X;X;B2;X;X;X;X;X;X;X;X;X;X;X;X;X;X;X	XXXXXXPPPPPPPPPPPPPPXXXXXXXXXXX	GASQAGMT(0.001)GY(0.98)GM(0.018)PR	GAS(-60.16)Q(-57.66)AGM(-45.34)T(-29.4)GY(17.25)GM(-17.25)PR(-43)	10	2	-1.1586	By MS/MS	By MS/MS	By MS/MS	1192100000	1192100000	0	0	NaN	235020000	358340000	345380000	NaN	NaN	NaN
V9HW43;P04792;F8WE04	54;54;54	V9HW43	V9HW43	Heat shock protein beta-1	HEL-S-102;HSPB1		0.948095	13.2775	1.25422e-12	109.44	83.058	96.143	0	0		NaN	0.948095	13.2775	1.25422e-12	109.44						1	Y	PEEWSQWLGGSSWPGYVRPLPPAAIESPAVA	X;X;X;X;X;X;X;X;X;X;X;X;X;X;X;B2;X;X;X;X;X;X;X;X;X;X;X;X;X;X;X	PPPPPPPPPPPPPPPPPPXXXXXXXXXXXXX	LPEEWSQWLGGSSW(0.007)PGY(0.948)VR(0.045)	LPE(-92.9)E(-90.33)W(-87.09)S(-83.25)Q(-83.17)W(-74.47)LGGS(-40.46)S(-35.05)W(-21.35)PGY(13.28)VR(-13.28)	17	3	-2.049	By matching	By MS/MS		567380000	567380000	0	0	0.43216	127990000	164300000	0	0.42694	0.30921	0
A0A0K0K1K4;O14818;Q05DH1;H0Y586;B0YJ74;Q8TAA3;H0UI83;A0A087WYS6;Q4G1B8	106;106;106;32;70;114;106;82;82	A0A0K0K1K4	A0A0K0K1K4	Proteasome subunit alpha type-7;Proteasome subunit alpha type;Proteasome subunit alpha type-7-like	PSMA7;PSMA8;hCG_41772		0.638839	4.87791	2.00709e-12	120.86	76.163	75.819	0	0		NaN	0.638839	4.87791	0.000115747	75.819	0.529321	1.51996	2.00709e-12	120.86		1	Y	CQSHRLTVEDPVTVEYITRYIASLKQRYTQS	X;X;X;X;X;X;X;X;X;X;X;X;X;X;X;B2;X;X;X;X;X;X;X;X;X;X;X;B2;X;X;X	XXXXXPPPPPPPPPPPPPPXXXXXXXXXXXX	LTVEDPVT(0.004)VE(0.119)Y(0.639)IT(0.208)R(0.03)	LT(-70.84)VE(-62.42)D(-57.68)PVT(-21.56)VE(-7.28)Y(4.88)IT(-4.88)R(-13.35)	11	2	0.65997	By matching	By MS/MS	By MS/MS	291840000	291840000	0	0	1.3499	66099000	79342000	92427000	0.60488	NaN	0.86447
Q53YD7;P26641;B4DUK7;B4DSR4;Q2F838	24;24;24;24;23	Q53YD7	Q53YD7	Elongation factor 1-gamma	EEF1G		0.832174	7.25736	2.41746e-12	125.97	76.254	125.97	0.452659	0	0.02167	44.318	0.832174	7.25736	2.41746e-12	125.97	0.61797	5.13232	0.000329866	61.765		1	Y	YPENWRAFKALIAAQYSGAQVRVLSAPPHFH	X;X;X;X;X;X;X;X;X;X;X;X;X;X;X;B2;X;X;X;X;X;X;X;X;X;X;X;X;X;X;X	XXXXXXXXXPPPPPPPPPPPPPXXXXXXXXX	ALIAAQ(0.011)Y(0.832)S(0.156)GAQVR	ALIAAQ(-18.76)Y(7.26)S(-7.26)GAQ(-34.88)VR(-51.59)	7	2	-0.04743		By MS/MS	By MS/MS	198910000	198910000	0	0	0.89824	0	89142000	109770000	0	1.2032	1.4844
A0A0C4DGL3;H0YNW5;H0YKC5;P33316;H0YMP1;H0YMM5;H0YKI0;H0YNJ9	56;82;144;167;36;82;167;79	A0A0C4DGL3;H0YNJ9	A0A0C4DGL3	Deoxyuridine 5'-triphosphate nucleotidohydrolase, mitochondrial	DUT		0.651616	4.09887	2.42679e-12	119.27	99.431	119.27	0	0		NaN	0.651616	4.09887	2.42679e-12	119.27						1	Y	AVVKTDIQIALPSGCYGRVAPRSGLAAKHFI	X;X;X;X;X;X;X;X;X;X;X;X;X;X;X;B2;X;X;X;X;X;X;X;X;X;X;X;X;X;X;X	XXXXPPPPPPPPPPPPPPXXXXXXXXXXXXX	TDIQIALPS(0.001)GC(0.093)Y(0.652)GR(0.254)	T(-117.61)D(-117.61)IQ(-109.39)IALPS(-26.66)GC(-8.44)Y(4.1)GR(-4.1)	12	2	-0.2278	By matching	By MS/MS		60711000	60711000	0	0	0.77627	28924000	31787000	0	0.61273	4.0687	0
Q9BYG3;B4DSM4	48;48	Q9BYG3	Q9BYG3	MKI67 FHA domain-interacting nucleolar phosphoprotein	NIFK		0.924953	10.9082	4.21594e-12	116.3	51.439	116.3	0.924953	10.9082	4.21594e-12	116.3	0.911791	10.1439	8.53498e-08	107.57	0.865927	8.10144	3.33621e-08	113.62		1	Y	ITQRKKQEQLTPGVVYVRHLPNLLDETQIFS	X;X;X;X;X;X;X;X;X;X;X;X;X;X;X;B2;X;X;X;X;X;X;X;X;X;X;X;X;X;X;X	XXXXXXPPPPPPPPPPPPXXXXXXXXXXXXX	QEQLTPGVVY(0.925)VR(0.075)	Q(-111.84)E(-111.84)Q(-92.95)LT(-52.26)PGVVY(10.91)VR(-10.91)	10	2	-0.3604	By matching	By MS/MS	By MS/MS	87829000	87829000	0	0	NaN	26486000	29814000	31529000	NaN	NaN	NaN
Q86SZ7;Q2TNB3;A0A087X1Z3;Q9UL46;Q6FHK9	33;33;33;33;33	Q86SZ7	Q86SZ7	Proteasome activator complex subunit 2	PSME2		0.617709	2.08497	4.85237e-12	120.03	95.812	120.03					0.617709	2.08497	4.85237e-12	120.03						1	Y	EVFRQNLFQEAEEFLYRFLPQKIIYLNQLLQ	X;X;X;X;X;X;X;X;X;X;X;X;X;X;X;B2;X;X;X;X;X;X;X;X;X;X;X;X;X;X;X	XXXXPPPPPPPPPPPPPXXXXXXXXXXXXXX	QNLFQEAEEFLY(0.618)R(0.382)	Q(-115.85)N(-115.85)LFQ(-85.14)E(-66.43)AE(-52.78)E(-38.32)FLY(2.08)R(-2.08)	12	3	0.070619		By MS/MS		122320000	122320000	0	0	0.15176	0	122320000	0	0	0.49369	0
A0A384MEJ3;G8JLB6;P31943;E9PCY7;H0YB39;Q68DG4;H0YBD7	236;236;236;236;111;58;50	A0A384MEJ3	A0A384MEJ3	Heterogeneous nuclear ribonucleoprotein H;Heterogeneous nuclear ribonucleoprotein H, N-terminally processed	HNRNPH1;DKFZp686A15170		0.88747	15.3225	8.41045e-12	97.5	97.219	97.5	0.328586	0	1.03838e-05	57.922	0.231317	0	4.68142e-08	84.942	0.88747	15.3225	8.41045e-12	97.5		1	Y	SIGRGAGFERMRRGAYGGGYGGYDDYNGYND	X;X;X;X;X;X;X;X;X;X;X;X;X;X;X;B2;X;X;X;B2;X;X;X;X;X;X;X;X;X;X;X	XXXXXXXXXXXXXPPPPPPPPPPPPPPPPPP	GAY(0.887)GGGY(0.026)GGY(0.026)D(0.026)D(0.026)Y(0.007)N(0.002)GYNDGYGFGSDR	GAY(15.32)GGGY(-15.32)GGY(-15.32)D(-15.32)D(-15.32)Y(-21.29)N(-27.16)GY(-55.39)N(-66.32)D(-74.29)GY(-84.41)GFGS(-97.22)D(-97.22)R(-97.5)	3	3	-1.6717			By MS/MS	194640000	194640000	0	0	0.59425	0	0	194640000	0	0	2.2342
B7Z6P1;A8K3K1;P68133;P68032;Q7Z7J6;A6NL76;D2JYH4;P63267;P62736;B3KW67;B3KUD3;B4DUI8;F8WB63;B8ZZJ2;C9JFL5;F6UVQ4;F6QUT6;B7Z6I1;C9JTX5;K7EM38;Q8WVW5;Q53G99;Q1KLZ0;P63261;P60709;B4E335;B4E3A4;Q53GK6;Q53G76;B4DVQ0;A0A2R8Y793;I3L3I0;I3L1U9;I3L4N8;A1E282;G5E9R0;E7EVS6;I3L3R2;A0A2R8YGF8;J3KT65;C9JUM1;C9JZR7	55;55;55;55;55;55;55;54;55;54;55;10;54;54;54;55;55;55;53;53;41;53;53;53;53;53;53;53;53;53;53;53;53;44;43;53;53;53;53;53;53;53	B7Z6P1;K7EM38;Q8WVW5	Q8WVW5	Actin, alpha skeletal muscle;Actin, alpha cardiac muscle 1;Actin, gamma-enteric smooth muscle;Actin, aortic smooth muscle;Actin, cytoplasmic 2;Actin, cytoplasmic 2, N-terminally processed;Actin, cytoplasmic 1;Actin, cytoplasmic 1, N-terminally processed	ACTA1;ACTC1;ACTA2;ACTG2;ACTB;ACTG1;PS1TP5BP1		0.961292	16.9618	8.54608e-12	125.24	114.13	90.913	0.868314	11.2102	8.54608e-12	125.24	0.961292	16.9618	4.00601e-07	106.38	0.961252	16.9618	9.46073e-09	116.52		1	Y	PRHQGVMVGMGQKDSYVGDEAQSKRGILTLK	X;X;B2;X;X;X;X;X;X;X;X;X;X;X;X;B2;X;X;X;X;X;X;X;X;X;X;X;X;X;X;B2	XXXXXXXXXXXXXPPPPPPPPPPPPXXXXXX	D(0.019)S(0.019)Y(0.961)VGDEAQSK	D(-16.96)S(-16.96)Y(16.96)VGD(-50.76)E(-63)AQ(-82.51)S(-87.69)K(-87.57)	3	3	-0.20744	By MS/MS	By MS/MS	By MS/MS	2174600000	2174600000	0	0	0.52444	482430000	654370000	512530000	0.6444	0.42357	0.2766
A0A024R258;B3KNI8;B3KNI2;Q9UMX0;D3DVA8;B4DZF1;B4DZF6;Q59F94;Q9NRR5;Q9UHD9;H0YDS0;Q59FJ2;B4DM19	269;269;269;269;101;265;259;278;279;265;66;175;265	A0A024R258	A0A024R258	Ubiquilin-1;Ubiquilin-4;Ubiquilin-2	UBQLN1;UBQLN4;UBQLN2		0.961352	15.0462	1.23591e-11	117.45	87.387	117.45	0.836895	7.97625	4.64183e-06	76.332	0.622935	2.75075	2.59574e-07	104.14	0.961352	15.0462	1.23591e-11	117.45		1	Y	NQDRALSNLESIPGGYNALRRMYTDIQEPML	X;X;X;X;X;X;X;X;X;X;X;X;X;X;X;B2;X;X;X;X;X;X;X;X;X;X;X;X;X;X;X	XXXXPPPPPPPPPPPPPPPPXXXXXXXXXXX	ALSNLESIPGGY(0.961)N(0.03)ALR(0.009)	ALS(-101.58)N(-96.05)LE(-71.51)S(-55.87)IPGGY(15.05)N(-15.05)ALR(-20.5)	12	2	-0.72358	By MS/MS	By MS/MS	By MS/MS	259760000	259760000	0	0	NaN	90797000	89635000	79326000	NaN	NaN	NaN
A0A0S2Z4Z0;Q96PK6;Q59GV2	249;249;183	A0A0S2Z4Z0	A0A0S2Z4Z0	RNA-binding protein 14	RBM14		0.863559	8.01348	1.55605e-11	124.74	92.601	124.74	0.863559	8.01348	1.55605e-11	124.74	0.84993	7.53088	3.41061e-11	120.33	0.831101	6.92029	1.24494e-05	102.01		1	Y	PATYRAQPSVSLGAAYRAQPSASLGVGYRTQ	X;X;B2;B2;X;X;X;X;X;X;X;X;X;X;X;B2;X;X;X;X;X;X;X;X;X;X;X;B2;B2;X;X	XXXXXPPPPPPPPPPPPXXXXXXXXXXXXXX	AQPSVSLGAAY(0.864)R(0.136)	AQ(-118.78)PS(-98.85)VS(-83.02)LGAAY(8.01)R(-8.01)	11	2	-1.3925	By MS/MS	By MS/MS	By MS/MS	260590000	260590000	0	0	8.5269	76835000	74693000	83650000	9.6873	6.8956	7.0905
A0A024R1U4;P51148;F8VVZ0;F8VUA5;F8VVK3;K7ENY4;K7ERI8;A0A024RB09;A0A024R2K1;K7ERQ8;P61020;P20339;Q6FI54;A0A0A1HAN9	83;83;82;82;83;14;83;82;82;83;82;82;82;82	A0A024R1U4	A0A024R1U4	Ras-related protein Rab-5C;Ras-related protein Rab-5B;Ras-related protein Rab-5A	RAB5C;RAB5B;RAB5A		0.983399	17.7265	1.60263e-11	125.81	109.59	125.81	0.7569	4.93605	3.40899e-05	88.392	0.820756	6.61368	1.38128e-05	95.909	0.983399	17.7265	1.60263e-11	125.81		1	Y	TTVKFEIWDTAGQERYHSLAPMYYRGAQAAI	X;X;X;X;X;X;X;X;X;X;X;X;X;X;X;B2;X;X;X;X;X;X;X;X;X;X;X;X;X;X;X	XXXXXXXXXXXXXXXPPPPPPPPPPXXXXXX	Y(0.983)H(0.017)SLAPMYYR	Y(17.73)H(-17.73)S(-57.03)LAPM(-113.97)Y(-108.49)Y(-108.08)R(-108.08)	1	2	-0.64921	By MS/MS	By MS/MS	By MS/MS	595000000	595000000	0	0	NaN	108330000	155480000	196250000	NaN	NaN	NaN
A0A024QZY1;Q13155;B2R7M3	35;35;35	A0A024QZY1	A0A024QZY1	Aminoacyl tRNA synthase complex-interacting multifunctional protein 2	JTV1;AIMP2		0.499977	0	1.97571e-11	104.38	75.657	97.124	0.499691	0	4.28629e-05	72.158	0.499977	0	8.5128e-11	97.124	0.499882	0	1.97571e-11	104.38		1	Y	LPTCMYRLPNVHGRSYGPAPGAGHVQEESNL	X;X;X;X;X;B2;B2;X;X;X;X;X;X;X;X;X;X;X;X;X;X;X;X;X;X;X;X;X;X;X;X	XXXXXXXXXXXXXXXXXXXXXXXXXXXXXXX	S(0.5)Y(0.5)GPAPGAGHVQEESNLSLQALESR	S(0)Y(0)GPAPGAGH(-40.66)VQ(-53.23)E(-65.36)E(-70.28)S(-74.92)N(-79.26)LS(-86.83)LQ(-89.73)ALE(-92.06)S(-94.32)R(-94.49)	2	3	-0.40352		By MS/MS		157020000	157020000	0	0	0.72838	0	157020000	0	0	2.2401	0
K9JA46;P07900;Q2VPJ6;Q8TBA7;O75322;Q86U12;Q96HX7	528;528;528;434;335;349;218	K9JA46	K9JA46	Heat shock protein HSP 90-alpha	EL52;HSP90AA1		0.665677	7.78617	2.72661e-11	104.88	87.017	104.88	0.578482	6.5617	4.99181e-08	94.845	0.637512	6.19154	4.20723e-08	94.973	0.665677	7.78617	2.72661e-11	104.88		1	Y	KHGLEVIYMIEPIDEYCVQQLKEFEGKTLVS	X;X;X;X;X;X;X;X;X;X;X;X;X;X;X;B2;X;X;X;X;X;X;X;X;X;X;X;X;X;X;X	XPPPPPPPPPPPPPPPPPPPPPXXXXXXXXX	HGLEVIYMIE(0.001)PID(0.111)E(0.111)Y(0.666)C(0.111)VQ(0.001)QLK	H(-90.52)GLE(-80.85)VIY(-50.78)M(-44.12)IE(-28.5)PID(-7.79)E(-7.79)Y(7.79)C(-7.79)VQ(-30.36)Q(-37.61)LK(-36.69)	15	3	1.9421	By MS/MS	By MS/MS	By MS/MS	1786700000	1786700000	0	0	0.89689	596200000	765660000	424840000	1.0578	1.0733	0.59407
Q6IPT9;Q6IPS9;Q53HR5;Q53HQ7;Q53HM9;Q53G85;P68104;A0A4D5RAC9;A8K9C4;Q6IPN6;Q53GA1;A0A4D5RAC7;Q53GE9;Q5VTE0;Q96RE1;A0A4D5RAE2;A0A4D5RAN2;A0A087WVQ9;B4DV42;A0A4D5RBG5;A0A4D5RA98;A0A4D5RA76;B4DNE0;A0A4D5RA52;A0A087WV01;Q9H2I7;Q9NZS6;Q16577;A0A4D5RA61;A0A4D5RAF1;A9X7H1;A0A4D5RBK4;A0A4D5RA69;A0A4D5RAA9;Q5JR01;A6PW80	86;86;86;86;86;86;86;86;86;86;86;86;86;86;22;23;86;86;38;86;86;86;86;86;86;86;50;22;86;86;2;86;86;86;86;86	Q6IPT9	Q6IPT9	Elongation factor 1-alpha;Elongation factor 1-alpha 1;Putative elongation factor 1-alpha-like 3	EEF1A1;EEF1A1P5;EEF1A1L14;PTI-1		0.499969	0	2.8218e-11	121.73	93.528	121.73	0.499969	0	2.8218e-11	121.73	0.499663	0	0.000289284	77.867	0.49977	0	0.00055173	58.172		1	Y	ITIDISLWKFETSKYYVTIIDAPGHRDFIKN	X;X;X;X;X;X;X;X;X;X;X;X;X;X;X;X;X;X;X;X;X;X;X;X;X;X;X;X;X;X;X	XXXXXXXXXXXXXXXXXXXXXXXXXXXXXXX	Y(0.5)Y(0.5)VTIIDAPGHR	Y(0)Y(0)VT(-39.09)IID(-83.43)APGH(-111.21)R(-117.58)	2	2	0.2149	By MS/MS			397470000	397470000	0	0	0.24909	397470000	0	0	0.74665	0	0
B0QYK0;Q01844;A9Z0R7;Q71E78;C3UMV4;C3UMV3;C3UMV2;F1JVV5	278;278;36;42;120;278;278;284	B0QYK0;F1JVV5	B0QYK0	RNA-binding protein EWS	EWSR1;EWSR1/ZNF384 fusion;EWSR1/ATF1 fusion		0.957726	18.6832	2.9159e-11	101.75	98.946	101.75	0.957726	18.6832	2.9159e-11	101.75					0.867266	14.3935	2.87235e-07	85.387		1	Y	QQSSFRQDHPSSMGVYGQESGGFSGPGENRS	X;X;X;X;X;X;X;X;X;X;X;X;X;X;X;B2;X;X;X;X;X;X;X;X;X;X;X;X;X;X;X	XXXXXXPPPPPPPPPPPPPPPPPPPPPPPPX	QDHPS(0.013)S(0.013)M(0.013)GVY(0.958)GQ(0.003)ESGGFSGPGENR	Q(-36.31)D(-36.31)H(-37.68)PS(-18.68)S(-18.68)M(-18.68)GVY(18.68)GQ(-25.7)E(-37.68)S(-48.99)GGFS(-72.59)GPGE(-90.55)N(-93.72)R(-93.56)	10	3	0.58801	By MS/MS		By MS/MS	146800000	146800000	0	0	1.5786	53086000	0	93716000	2.3518	0	2.7014
Q53HG7;A0A384MDY8;Q14247;A0A024R5M3;B3KRK4	538;538;538;501;222	Q53HG7	Q53HG7	Src substrate cortactin	CTTN		0.999991	54.1684	2.91876e-11	121.5	97.979	121.5	0.992725	22.1515	0.000237519	69.864	0.99977	37.1084	0.000130418	84.821	0.999991	54.1684	2.91876e-11	121.5		1	Y	EMIDDGWWRGVCKGRYGLFPANYVELRQ___	X;X;X;X;X;X;X;X;X;X;X;X;X;X;X;B2;X;X;X;X;X;X;X;X;X;X;X;X;X;X;X	XXXXXXXXXXXXXXXPPPPPPPPPPPPXXXX	Y(1)GLFPANYVELR	Y(54.17)GLFPAN(-54.17)Y(-54.17)VE(-59.04)LR(-68.92)	1	2	-2.4972	By MS/MS	By MS/MS	By MS/MS	427740000	427740000	0	0	3.5191	36346000	54440000	41301000	0.78715	1.517	1.046
C9JZR2;O60716;Q96FS1;A0A669KB62;A0A669KB05;Q68DU0;Q7KZJ3;A0A024R4Z0;A0A024R4Y7	656;656;547;626;632;656;327;327;327	C9JZR2	C9JZR2	Catenin delta-1	CTNND1;DKFZp781O2021		0.990117	20.0082	3.74861e-11	119.53	54.817	90.108	0.990117	20.0082	0.000127866	90.108	0.944244	12.288	0.000212009	85.355	0.955007	13.2708	3.74861e-11	119.53		1	Y	NDTVDFPKRTSPARGYELLFQPEVVRIYISL	X;X;X;X;X;X;X;X;X;X;X;X;X;X;X;B2;X;X;X;X;X;X;X;X;X;X;X;X;X;X;X	XXXXXXXXXXXXXXPPPPPPPPPPPPXXXXX	GY(0.99)E(0.01)LLFQPEVVR	GY(20.01)E(-20.01)LLFQ(-61.38)PE(-73.97)VVR(-84.57)	2	2	-0.26777	By MS/MS	By MS/MS	By MS/MS	227270000	227270000	0	0	10.909	55178000	72748000	64069000	9.3676	11.645	7.3685
A0A0S2Z4Z0;Q96PK6;Q59GV2	261;261;195	A0A0S2Z4Z0	A0A0S2Z4Z0	RNA-binding protein 14	RBM14		0.926777	11.0233	4.31673e-11	118.18	81.196	118.18	0.884945	8.86011	5.79969e-08	110.76	0.921639	10.7046	3.28972e-06	105.4	0.926777	11.0233	4.31673e-11	118.18		1	Y	GAAYRAQPSASLGVGYRTQPMTAQAASYRAQ	X;X;X;B2;B2;X;X;X;X;X;X;X;X;X;X;B2;X;X;X;X;X;X;X;X;X;X;X;B2;B2;X;X	XXXXXPPPPPPPPPPPPXXXXXXXXXXXXXX	AQPSASLGVGY(0.927)R(0.073)	AQ(-112.36)PS(-90.85)AS(-73.97)LGVGY(11.02)R(-11.02)	11	2	0.044666	By MS/MS	By MS/MS	By MS/MS	387090000	387090000	0	0	15.727	95596000	119830000	127770000	15.805	14.82	12.193
A0A0B4J1R4;P32754;B5FX47	221;221;219	A0A0B4J1R4	A0A0B4J1R4	4-hydroxyphenylpyruvate dioxygenase	HPD		0.58176	6.54314	4.36549e-11	116.35	99.108	75.463	0.497088	4.1121	4.36549e-11	116.35	0.58176	6.54314	1.57083e-06	75.463	0.476731	4.32921	7.11375e-05	58.83		1	Y	FHRFWSVDDTQVHTEYSSLRSIVVANYEESI	X;X;X;X;X;X;X;X;X;X;X;X;X;X;X;B2;X;X;X;X;X;X;X;X;X;X;X;X;X;X;X	XXXPPPPPPPPPPPPPPPPPXXXXXXXXXXX	FWSVDDTQVH(0.002)T(0.012)E(0.082)Y(0.582)S(0.082)S(0.111)LR(0.129)	FW(-71.97)S(-54.23)VD(-54.52)D(-54.52)T(-54.52)Q(-40.13)VH(-24.85)T(-16.79)E(-8.5)Y(6.54)S(-8.5)S(-7.21)LR(-6.54)	13	3	-1.6714		By MS/MS		129330000	129330000	0	0	3.0867	0	129330000	0	0	NaN	0
A0A0S2Z5D4;Q9UJW0;A0A0S2Z5B8	232;232;232	A0A0S2Z5D4	A0A0S2Z5D4	Dynactin subunit 4	DCTN4		0.553415	5.53535	8.25217e-11	71.709	57.383	59.017					0.553415	5.53535	3.07854e-08	59.017	0.542207	5.12861	8.25217e-11	71.709		1	Y	EPAQAVDEVEPLPEDYYTRPVNLTEVTTLQQ	X;X;X;X;X;X;X;X;X;X;X;X;X;X;X;B2;X;X;X;X;X;X;X;X;X;X;X;X;X;X;X	PPPPPPPPPPPPPPPPPPPPPPPPPPPPPPP	IEPAQAVDEVE(0.001)PLPE(0.038)D(0.155)Y(0.553)Y(0.155)T(0.045)R(0.045)PVN(0.004)LTEVTTLQQR	IE(-34.66)PAQ(-34.9)AVD(-30.54)E(-31.05)VE(-26.51)PLPE(-11.62)D(-5.54)Y(5.54)Y(-5.54)T(-10.91)R(-10.91)PVN(-21.13)LT(-30.54)E(-32.75)VT(-31.91)T(-31.47)LQ(-31.03)Q(-31.03)R(-36.44)	17	4	-1.3994		By MS/MS	By MS/MS	193000000	193000000	0	0	0.95202	0	77130000	115870000	0	0.81539	1.8062
A0A2R8Y811;P62263;E5RH77	72;72;72	A0A2R8Y811	A0A2R8Y811	40S ribosomal protein S14	RPS14		0.98445	22.1309	8.87047e-11	102.15	88.416	102.15	0.974446	20.4319	1.19901e-10	100.59	0.848233	11.0357	2.06528e-07	92.95	0.98445	22.1309	8.87047e-11	102.15		1	Y	TGGMKVKADRDESSPYAAMLAAQDVAQRCKE	X;X;X;X;X;X;X;X;X;X;X;X;X;X;X;B2;X;X;X;X;X;X;X;X;X;X;X;X;X;X;X	XXXXXXXPPPPPPPPPPPPPPPPPPPPPXXX	AD(0.001)R(0.001)D(0.001)E(0.004)S(0.003)S(0.006)PY(0.984)AAM(0.001)LAAQDVAQR	AD(-30.61)R(-31.16)D(-32.22)E(-24.3)S(-25.41)S(-22.13)PY(22.13)AAM(-30.71)LAAQ(-61.83)D(-70.18)VAQ(-91.06)R(-93.61)	9	3	-1.8199	By MS/MS	By MS/MS	By MS/MS	1156900000	1156900000	0	0	17.457	247600000	216880000	357550000	6.7427	7.3397	NaN
B4DYY5;F8W726;Q14157;B4DZJ6;H0Y5H6;H7C2T8	845;845;834;748;113;165	B4DYY5;B4DZJ6	B4DZJ6	Ubiquitin-associated protein 2-like	UBAP2L		0.703445	7.3904	9.57709e-11	103.76	75.018	103.76					0.321688	0	4.71685e-06	89.507	0.703445	7.3904	9.57709e-11	103.76		1	Y	GYDDLQMLQTRFPLDYYSIPFPTPTTPLTGR	X;X;X;X;X;X;X;X;X;X;X;X;X;X;X;B2;X;X;X;X;X;X;X;X;X;X;X;X;X;X;X	XXXXXXXXXXXPPPPPPPPPPPPPPPPPPPP	FPLD(0.128)Y(0.703)Y(0.128)S(0.04)IPFPTPTTPLTGR	FPLD(-7.39)Y(7.39)Y(-7.39)S(-12.45)IPFPT(-58.48)PT(-69.58)T(-77.78)PLT(-87.41)GR(-96.86)	5	2	1.0576			By MS/MS	47932000	47932000	0	0	6.3574	0	0	47932000	NaN	0	NaN
A0A384NL63;P51991;B4E3E6;B4DDB6;B4E036;Q8NFG3;H7C1J8;Q66K53	360;360;305;338;121;45;97;171	A0A384NL63	A0A384NL63	Heterogeneous nuclear ribonucleoprotein A3	HNRNPA3;HNRPA3		0.954187	14.9634	9.62148e-11	101.01	98.03	96.848	0.954187	14.9634	1.19745e-10	101.01	0.940921	12.7912	9.62148e-11	98.76	0.394881	0	0.000168776	67.11		1	Y	PMKGGSFGGRSSGSPYGGGYGSGGGSGGYGS	X;X;X;X;X;X;X;X;X;X;X;X;X;B2;X;B2;X;X;X;X;X;X;X;X;X;X;X;X;X;X;X	XXXXXXXXXXPPPPPPPPPPPPPPPPPPPPP	S(0.007)S(0.007)GS(0.03)PY(0.954)GGGYGSGGGSGGYGSR	S(-21.07)S(-21.07)GS(-14.96)PY(14.96)GGGY(-32.98)GS(-57.19)GGGS(-76.24)GGY(-87.28)GS(-90.2)R(-92.75)	6	3	-0.47587	By MS/MS	By MS/MS		137360000	137360000	0	0	1.6412	87797000	49564000	0	5.6244	1.3318	0
A0A0C4DGQ6;A0A024RC37;Q96P16;Q9NQG5;E9PIQ9	61;61;61;61;61	A0A0C4DGQ6;Q9NQG5	Q9NQG5	Regulation of nuclear pre-mRNA domain-containing protein 1A;Regulation of nuclear pre-mRNA domain-containing protein 1B	RPRD1A;P15RS;RPRD1B		0.99916	32.4612	1.10269e-10	111.26	87.652	84.946	0.999036	32.0027	5.0276e-07	105.2	0.998604	31.1171	1.69531e-05	84.946	0.99916	32.4612	1.10269e-10	111.26		1	Y	RELRKAKPNRKLTFLYLANDVIQNSKRKGPE;RELRKAKSNRKLTFLYLANDVIQNSKRKGPE	X;X;X;X;X;X;X;X;X;X;X;X;X;X;X;B2;X;X;X;X;X;X;X;X;X;X;X;X;X;X;X	XXXXXXXXXXXPPPPPPPPPPPPPPPXXXXX	LTFLY(0.999)LAN(0.001)DVIQNSK	LT(-36.62)FLY(32.46)LAN(-32.46)D(-42.56)VIQ(-68.17)N(-71.99)S(-74.49)K(-74.18)	5	3	0.12959	By MS/MS	By MS/MS	By MS/MS	416210000	416210000	0	0	NaN	88250000	52840000	49151000	NaN	NaN	NaN
A0A0D9SFB3;A0A2R8YF78;A0A2R8YCW1;A0A0D9SG12;A0A2R8YFR4;A0A2U3TZJ9;A0A2R8YFS5;B5BTY4;A0A2R8Y4A4;Q59GX6;A0A2R8Y645;A0A0D9SF53;O00571;A0A2R8Y5G6;F6S8Q4;A0A2R8YDH3;A0A2R8YDT5;A0A2R8Y7T2;A0A024R9A4;O15523;Q5S4N1;B4E132;A0A0J9YVQ7	462;462;448;462;461;461;462;462;462;474;516;462;462;423;429;462;276;276;460;460;179;207;45	A0A0D9SFB3	A0A0D9SFB3	ATP-dependent RNA helicase DDX3X;ATP-dependent RNA helicase DDX3Y	DDX3X;DDX3Y		0.525316	5.06382	1.13869e-10	101.62	97.96	60.272	0.297598	0	1.13869e-10	101.62	0.525316	5.06382	8.86232e-07	87.326	0.438247	4.69336	5.42924e-05	68.42		1	Y	FVETKKGADSLEDFLYHEGYACTSIHGDRSQ	X;X;X;X;X;X;X;X;X;X;X;X;X;X;X;B2;X;X;X;X;X;X;X;X;X;X;X;X;X;X;X	XXXXXPPPPPPPPPPPPPPPPPPPPPPPPXX	GAD(0.003)S(0.01)LE(0.142)D(0.142)FLY(0.525)H(0.164)E(0.013)GYACTSIHGDR	GAD(-22.1)S(-17.04)LE(-5.69)D(-5.69)FLY(5.06)H(-5.06)E(-15.96)GY(-30.27)AC(-38.23)T(-41.89)S(-45.31)IH(-51.32)GD(-53.83)R(-56.08)	10	3	0.56909		By MS/MS		86065000	86065000	0	0	0.4401	0	86065000	0	0	0.85574	0
A0A090N8Y2;A0A499FI48;P13667	273;273;273	A0A090N8Y2	A0A090N8Y2	Protein disulfide-isomerase A4	ERP70;PDIA4		0.999678	35.2288	1.29045e-10	116.58	105.53	114.72	0.999678	35.2288	6.65958e-10	114.72	0.998998	30.0451	1.29045e-10	116.58	0.999098	30.7093	7.43142e-10	112.24		1	Y	FRKGRPYDYNGPREKYGIVDYMIEQSGPPSK	X;X;X;X;X;X;X;X;X;X;X;X;X;X;X;B2;X;X;X;X;X;X;X;X;X;X;X;X;X;X;X	XXXXXXXXXXXXXXXPPPPPPPPPPPPPPPP	Y(1)GIVDYMIEQSGPPSK	Y(35.23)GIVD(-35.23)Y(-47.26)M(-55.15)IE(-79.08)Q(-93.77)S(-102.36)GPPS(-114.24)K(-114.72)	1	2	-1.4115	By MS/MS	By MS/MS	By MS/MS	852500000	852500000	0	0	29.149	95213000	122600000	165440000	5.5057	10.257	NaN
A0A087WXM6;J3QQT2;J3KRX5;A0A024R261;A0A0A6YYL6;P18621;J3KRB3;A0A087WWH0;J3QS96;A0A087WY81;J3KSJ0	4;4;4;4;4;4;4;4;4;4;4	A0A087WXM6	A0A087WXM6	60S ribosomal protein L17	RPL17;hCG_24487;RPL17-C18orf32		0.806588	6.20168	1.53951e-10	171.46	147.89	171.46	0.702769	3.73985	1.95912e-06	107.56	0.5	0	1.05657e-09	150.17	0.806588	6.20168	1.53951e-10	171.46		1	Y	____________MVRYSLDPENPTKSCKSRG	X;X;X;X;X;X;X;X;X;X;X;X;X;X;X;B2;X;X;X;X;X;X;X;X;X;X;X;X;X;X;X	XXXXXXXXXXXXXXXPPPPPPPPPPXXXXXX	Y(0.807)S(0.193)LDPENPTK	Y(6.2)S(-6.2)LD(-68.95)PE(-122.37)N(-151.69)PT(-167.89)K(-171.46)	1	2	0.26284	By MS/MS	By MS/MS	By MS/MS	1130200000	1130200000	0	0	11.306	320360000	323220000	305000000	12.781	8.6333	8.1421
P52298;F8WE41;Q7Z3W9	20;20;39	P52298	P52298	Nuclear cap-binding protein subunit 2	NCBP2;DKFZp686G18222		0.701199	4.5565	1.55603e-10	169.12	149.35	169.12									0.701199	4.5565	1.55603e-10	169.12		1	Y	LLKALRSDSYVELSQYRDQHFRGDNEEQEKL	X;X;X;X;X;X;X;X;X;X;X;X;X;X;X;B2;X;X;X;X;X;X;X;X;X;X;X;X;X;X;X	XXXXXXPPPPPPPPPPPXXXXXXXXXXXXXX	SDSYVELSQ(0.053)Y(0.701)R(0.246)	S(-166.72)D(-166.72)S(-162.53)Y(-150.03)VE(-87.83)LS(-35.89)Q(-11.21)Y(4.56)R(-4.56)	10	2	-1.7969			By MS/MS	68197000	68197000	0	0	1.0007	0	0	68197000	0	0	2.8959
V9HWJ0;B4DJ30;Q14697;F5H6X6;B4DSM6;A0A024R592;B4DIW2;E9PKU7;B4DZ53;Q9BS14	792;843;792;695;695;695;678;700;700;161	V9HWJ0	V9HWJ0	Neutral alpha-glucosidase AB	HEL-S-164nA;GANAB		0.996513	28.0382	1.71974e-10	102.07	81.544	102.07	0.984517	19.2482	9.6513e-07	89.011	0.996513	28.0382	1.71974e-10	102.07	0.969528	18.6535	3.75369e-05	81.016		1	Y	YDIQSYQKHHGPQTLYLPVTLSSIPVFQRGG	X;X;X;X;X;X;X;X;X;X;X;X;X;X;X;B2;X;X;X;X;X;X;X;X;X;X;X;X;X;X;X	XXXXXXXXPPPPPPPPPPPPPPPPPPPPPXX	HHGPQ(0.002)T(0.001)LY(0.997)LPVTLSSIPVFQR	H(-35.53)H(-35.53)GPQ(-28.04)T(-28.77)LY(28.04)LPVT(-44.04)LS(-56.72)S(-63.19)IPVFQ(-80.5)R(-84.92)	8	4	0.99398	By MS/MS	By MS/MS	By MS/MS	224480000	224480000	0	0	0.15774	42479000	86702000	95296000	0.2557	0.11852	0.18139
P38159;B4E352;B3KRG5;H3BUY5;H0Y6E7;H3BT71;Q2VIN3;Q96E39	272;233;137;144;274;272;272;272	P38159;Q2VIN3	P38159	RNA-binding motif protein, X chromosome;RNA-binding motif protein, X chromosome, N-terminally processed;RNA binding motif protein, X-linked-like-1	RBMX;RBMXL1		0.6378	4.53361	1.76446e-10	121.73	98.413	86.413	0.6378	4.53361	7.90769e-05	86.413	0.376822	0	2.24045e-05	98.254	0.46381	0	1.76446e-10	121.73		1	Y	SRGYGDRDGYGRDRDYSDHPSGGSYRDSYES;SRGYSDRDGYGRDRDYSDHPSGGSYRDSYES	X;X;X;X;X;X;X;X;X;X;X;X;X;X;X;B2;X;X;X;X;X;X;X;X;X;X;B2;X;B2;X;B2	XXXXXXXXXXXXPPPPPPPPPPPPPPXXXXX	D(0.003)R(0.003)D(0.042)Y(0.638)S(0.225)D(0.079)H(0.01)PSGGSYR	D(-23.16)R(-23.16)D(-11.83)Y(4.53)S(-4.53)D(-9.05)H(-17.99)PS(-60.67)GGS(-77.78)Y(-82.62)R(-84.22)	4	4	-0.20536	By MS/MS			152610000	152610000	0	0	0.51909	152610000	0	0	1.9362	0	0
B2RAW0;A0A024R036;P98082;B4DNN1	685;685;685;468	B2RAW0	B2RAW0	Disabled homolog 2	DAB2		0.668586	4.97325	1.81059e-10	98.188	84.03	98.188	0	0		NaN	0.524501	3.97547	4.53546e-07	89.831	0.668586	4.97325	1.81059e-10	98.188		1	Y	KGEQTSSGTLSAFASYFNSKVGIPQENADHD	X;X;X;X;X;X;X;X;X;X;X;X;X;X;X;B2;X;X;X;X;X;X;X;X;X;X;X;X;X;X;X	PPPPPPPPPPPPPPPPPPPPXXXXXXXXXXX	KGEQTSSGTLSAFAS(0.213)Y(0.669)FN(0.068)S(0.022)K(0.028)	K(-90.38)GE(-90.48)Q(-90.65)T(-90.83)S(-84.87)S(-78.11)GT(-70.81)LS(-49.27)AFAS(-4.97)Y(4.97)FN(-9.91)S(-14.79)K(-13.75)	16	3	1.8859	By matching	By MS/MS	By MS/MS	141090000	141090000	0	0	NaN	43872000	43737000	53483000	NaN	NaN	NaN
Q15645;H0YAL2	56;52	Q15645	Q15645	Pachytene checkpoint protein 2 homolog	TRIP13		0.668882	6.55304	1.8637e-10	97.271	84.79	97.271									0.668882	6.55304	1.8637e-10	97.271		1	Y	SVRKLLNRHNIVFGDYTWTEFDEPFLTRNVQ	X;X;X;X;X;X;X;X;X;X;X;X;X;X;X;B2;X;X;X;X;X;X;X;X;X;X;X;X;X;X;X	XXXXXXXXPPPPPPPPPPPPPPPPPPPPXXX	HNIVFGD(0.148)Y(0.669)T(0.148)W(0.033)T(0.001)EFDEPFLTR	H(-33.69)N(-33.69)IVFGD(-6.55)Y(6.55)T(-6.55)W(-13.02)T(-27.18)E(-40.55)FD(-58.39)E(-69.35)PFLT(-81.83)R(-85.84)	8	3	-1.4166			By MS/MS	109250000	109250000	0	0	0.065183	0	0	109250000	0	0	0.19345
A0A024R6Q2;Q96FX7	67;67	A0A024R6Q2	A0A024R6Q2	tRNA (adenine(58)-N(1))-methyltransferase catalytic subunit TRMT61A	C14orf172;TRMT61A		0.856793	7.77889	1.92381e-10	101.53	87.275	101.53	0	0		NaN	0.856793	7.77889	1.92381e-10	101.53	0	0		NaN		1	Y	RPFGSKVTCGRGGWVYVLHPTPELWTLNLPH	X;X;X;X;X;X;X;X;X;X;X;X;X;X;X;B2;X;X;X;X;X;X;X;X;X;X;X;X;X;X;X	XXXXXXXXXXXPPPPPPPPPPPPPPPPPPPP	GGW(0.143)VY(0.857)VLHPTPELWTLNLPHR	GGW(-7.78)VY(7.78)VLH(-34.66)PT(-46.27)PE(-50.18)LW(-71.44)T(-77.81)LN(-93.82)LPH(-101.22)R(-101.28)	5	4	0.36887	By matching	By MS/MS	By matching	61490000	61490000	0	0	0.94677	26175000	26937000	8378600	1.0842	0.66014	NaN
A0A140VK46;P28070	75;75	A0A140VK46	A0A140VK46	Proteasome subunit beta type-4	PSMB4		0.740277	5.907	2.59611e-10	98.943	75.515	95.414	0.72403	5.55352	4.71767e-07	91.812	0.740277	5.907	1.78406e-08	95.414	0.631292	4.85334	2.59611e-10	98.943		1	Y	KFEGGVVIAADMLGSYGSLARFRNISRIMRV	X;X;X;X;X;X;X;X;X;X;X;X;X;X;X;B2;X;X;X;X;X;X;X;X;X;X;X;X;X;X;X	XPPPPPPPPPPPPPPPPPPPPXXXXXXXXXX	FEGGVVIAADMLGS(0.19)Y(0.74)GS(0.057)LAR(0.013)	FE(-91.77)GGVVIAAD(-59.42)M(-46.8)LGS(-5.91)Y(5.91)GS(-11.16)LAR(-17.51)	15	3	0.80886	By MS/MS	By MS/MS	By MS/MS	677610000	677610000	0	0	6.5539	199230000	196840000	35684000	7.6595	5.7666	0.82516
A0A0C4DGL3;H0YNW5;H0YKC5;P33316	116;142;204;227	A0A0C4DGL3	A0A0C4DGL3	Deoxyuridine 5'-triphosphate nucleotidohydrolase, mitochondrial	DUT		0.992998	21.5805	3.21624e-10	112.51	85.904	112.51	0.992998	21.5805	3.21624e-10	112.51	0	0		NaN	0.962098	14.8312	6.12731e-06	63.145		1	Y	KKGDRIAQLICERIFYPEIEEVQALDDTERG	X;X;X;X;X;X;X;X;X;X;X;X;X;X;X;B2;X;X;X;X;X;X;X;X;X;X;X;X;X;X;X	XXXXXXXXXXXXXPPPPPPPPPPPPPPPPPX	IFY(0.993)PE(0.007)IEEVQALDDTER	IFY(21.58)PE(-21.58)IE(-40.42)E(-49.58)VQ(-76.77)ALD(-98.83)D(-104.78)T(-109.56)E(-109.38)R(-112.51)	3	2	-0.051336	By MS/MS	By matching	By MS/MS	207320000	207320000	0	0	0.17434	35658000	48238000	53333000	0.13587	0.11455	0.10548
K7EM38;Q8WVW5;Q53G99;Q1KLZ0;P63261;P60709;B4E335;B4E3A4;Q53GK6;Q53G76;B4DVQ0;B4DW52;A0A2R8Y793;I3L3I0;I3L1U9;I3L4N8;A1E282;G5E9R0;E7EVS6;I3L3R2;A0A2R8YGF8;J3KT65;C9JUM1;C9JZR7;L0R5C4;Q9BYX7;Q562N2;Q562Z7;Q562Y6;Q562X9;Q562N8;Q562N0;Q562L5;Q562S0;Q562U2;Q562N6;Q562N4;Q562L6;Q562P9;Q562Y8;Q562M5;Q562M3;Q562Y4;Q562X7;Q562X6;Q562X4;Q562X2;Q562X1;Q562X0;Q562U1;Q562T8;Q562T6;Q562T5;Q562T4;Q562T3;Q562T0…	91;79;91;91;91;91;91;91;91;91;91;63;91;91;91;82;81;91;91;91;91;91;91;91;162;91;8;8;8;8;8;8;8;8;8;8;8;8;8;8;8;8;8;8;8;8;8;8;8;8;8;8;8;8;8;8;8;8;8;8;8;8;8;8;8;8;8;8;8;8;791;791;791;754	K7EM38;Q8WVW5;Q562Z7;Q562W2;Q562Q6;Q6S8J3	Q8WVW5	Actin, cytoplasmic 2;Actin, cytoplasmic 2, N-terminally processed;Actin, cytoplasmic 1;Actin, cytoplasmic 1, N-terminally processed;Putative beta-actin-like protein 3;Putative beta-actin-like protein 3, N-terminally processed;POTE ankyrin domain family member E;POTE ankyrin domain family member F;POTE ankyrin domain family member I;POTE ankyrin domain family member J	ACTG1;PS1TP5BP1;ACTB;POTEM;POTEKP;ACT;POTEE;POTEF;POTEI;POTEJ		0.976672	17.5784	3.22469e-10	149.72	125.69	110.76	0.866381	9.81475	4.96846e-05	93.598	0.97093	16.4859	3.22469e-10	149.72	0.976672	17.5784	6.52559e-07	110.76		1	Y	________KIWHHTFYNELRVAPEEHPILLT;________KIWHHTFYNELRVAPEEHPVLLT;________KIWHHTFYNELRVAPEEQPMLLI;ITNWDDMEKIWHHTFYNELRVAPEEHPILLT;VTNWDDMEKIWHHTFYNELRVAPEEHPVLLT	X;X;X;X;X;X;X;X;X;X;X;X;X;X;X;B2;X;X;X;X;X;X;X;B2;X;X;X;X;X;X;X	XXXXXXXXXPPPPPPPPPPPXXXXXXXXXXX	IWHHT(0.002)FY(0.977)N(0.017)E(0.004)LR	IW(-82.98)H(-69.76)H(-52.32)T(-26.14)FY(17.58)N(-17.58)E(-24.09)LR(-40.94)	7	2	0.055334	By MS/MS	By MS/MS	By MS/MS	7466900000	7466900000	0	0	2.1811	532160000	681510000	578980000	0.51788	0.56065	0.49055
A0A2R8Y6J3;B3KTM6;A2RUM7;P46777;Q5T7N0;A0A2R8Y4A2;Q9BUV4;Q59GX9	16;16;66;66;16;66;66;73	A0A2R8Y6J3;Q59GX9	A0A2R8Y6J3	60S ribosomal protein L5	RPL5		0.985973	18.4705	3.46801e-10	170.22	127.19	140.09	0.898472	9.4692	3.46801e-10	170.22	0.898472	9.4692	3.46801e-10	170.22	0.985973	18.4705	3.46801e-10	170.22		1	Y	MIVRVTNRDIICQIAYARIEGDMIVCAAYAH	X;X;X;X;X;X;X;X;X;X;X;X;X;X;X;B2;X;X;X;X;X;X;X;X;X;X;X;X;X;X;X	XXXXXXXXPPPPPPPPPPXXXXXXXXXXXXX	DIICQIAY(0.986)AR(0.014)	D(-134.31)IIC(-86.92)Q(-53.14)IAY(18.47)AR(-18.47)	8	2	2.5949	By MS/MS	By MS/MS	By MS/MS	4127500000	4127500000	0	0	NaN	807040000	914150000	1200000000	NaN	NaN	NaN
I0CE67;Q6I9R8;Q2XQU9;Q14192;Q2TSB7;Q53T40	166;176;286;176;176;65	I0CE67	I0CE67	Four and a half LIM domains protein 2	FHL2;AAG11		0.868892	8.55261	3.63562e-10	149.33	130.06	149.33	0.783294	8.59096	1.70416e-07	117.02	0.868892	8.55261	3.63562e-10	149.33	0.855599	8.14484	2.88317e-07	115.7		1	Y	QCVQCKKPITTGGVTYREQPWHKECFVCTAC	X;X;X;X;X;X;X;X;X;X;X;X;X;X;X;B2;X;X;X;X;X;X;X;X;X;X;X;X;X;X;X	XXXXXXPPPPPPPPPPPXXXXXXXXXXXXXX	KPITTGGVT(0.01)Y(0.869)R(0.121)	K(-147.95)PIT(-109.79)T(-80.96)GGVT(-19.45)Y(8.55)R(-8.55)	10	2	-0.32321	By MS/MS	By MS/MS	By MS/MS	1428100000	1428100000	0	0	70.355	399710000	468660000	430290000	77.482	66.802	52.968
A0A024RAC5;Q9P258;A5PLK7	359;359;294	A0A024RAC5	A0A024RAC5	Protein RCC2	RCC2		0.914405	10.2869	3.68012e-10	143.89	120.36	143.89	0.867698	8.16806	1.01023e-05	101.54	0.798454	5.97879	4.86137e-06	104.44	0.914405	10.2869	3.68012e-10	143.89		1	Y	VLDSQKRVFSWGFGGYGRLGHAEQKDEMVPR	X;X;X;X;X;X;X;X;X;X;X;X;X;X;X;B2;X;X;X;X;X;X;X;X;X;X;X;X;X;X;X	XXXXXXXPPPPPPPPPPPXXXXXXXXXXXXX	VFSWGFGGY(0.914)GR(0.086)	VFS(-109.7)W(-75.5)GFGGY(10.29)GR(-10.29)	9	2	0.24369	By MS/MS	By MS/MS	By MS/MS	281230000	281230000	0	0	NaN	66708000	84638000	90399000	NaN	NaN	NaN
A0A024RBX9;P08559;Q53GE3;Q5JPU0;Q5JPU1	118;118;118;118;156	A0A024RBX9	A0A024RBX9	Pyruvate dehydrogenase E1 component subunit alpha;Pyruvate dehydrogenase E1 component subunit alpha, somatic form, mitochondrial	PDHA1		0.53215	1.31374	4.693e-10	70.67	67.431	70.67	0	0		NaN	0.53215	1.31374	4.693e-10	70.67	0	0		NaN		1	Y	GLEAGINPTDHLITAYRAHGFTFTRGLSVRE	X;X;X;X;X;X;X;X;X;X;X;X;X;X;X;B2;X;X;X;X;X;X;X;X;X;X;X;X;X;X;X	PPPPPPPPPPPPPPPPPXXXXXXXXXXXXXX	GFCHLCDGQEACCVGLEAGINPTDH(0.004)LIT(0.07)AY(0.532)R(0.393)	GFC(-70.62)H(-70.62)LC(-65.51)D(-60.7)GQ(-55.03)E(-55.27)AC(-49.2)C(-49.2)VGLE(-49.2)AGIN(-40.57)PT(-34.75)D(-34.75)H(-21.57)LIT(-8.78)AY(1.31)R(-1.31)	30	4	-0.86696	By matching	By MS/MS	By matching	65702000	65702000	0	0	0.28894	11036000	34632000	20033000	0.22039	0.40807	0.21671
A0A0R4J2E8;A8MXP9;P43243;D6REM6;Q68D11;D6R991	158;158;158;158;158;158	A0A0R4J2E8	A0A0R4J2E8	Matrin-3	MATR3;DKFZp686K23100		0.959734	15.1917	4.86445e-10	159.1	127.68	159.1	0.95139	14.5176	5.68816e-10	135.86	0.949896	14.5399	6.31521e-08	122.44	0.959734	15.1917	4.86445e-10	159.1		1	Y	LQLKRRRTEEGPTLSYGRDGRSATREPPYRV	X;X;X;X;X;X;X;X;X;X;X;X;X;X;X;B2;X;X;X;X;X;X;X;X;X;X;X;X;X;X;X	XXXXXXXPPPPPPPPPPPXXXXXXXXXXXXX	TEEGPTLS(0.011)Y(0.96)GR(0.029)	T(-148.64)E(-148.64)E(-121.95)GPT(-75.67)LS(-19.32)Y(15.19)GR(-15.19)	9	2	0.54283	By MS/MS	By MS/MS	By MS/MS	685020000	685020000	0	0	17.638	175900000	214970000	255010000	16.486	16.437	16.899
J3KTL2;Q07955;Q59FA2;A8K1L8;J3QQV5;J3KSW7	19;19;51;19;19;19	J3KTL2	J3KTL2	Serine/arginine-rich splicing factor 1	SRSF1		1	66.2647	5.02363e-10	129.89	97.881	129.89	0.999995	52.9725	7.82942e-08	120.99	1	66.4224	1.11111e-07	117.84	1	66.2647	5.02363e-10	129.89		1	Y	GGVIRGPAGNNDCRIYVGNLPPDIRTKDIED	X;X;X;X;X;X;X;X;X;X;X;X;X;X;X;B2;X;X;X;X;X;X;X;X;X;X;X;X;X;X;X	XXXXXXXXXXXXXXPPPPPPPPPPPXXXXXX	IY(1)VGNLPPDIR	IY(66.26)VGN(-66.26)LPPD(-120.78)IR(-129.15)	2	3	-1.1194	By MS/MS	By MS/MS	By MS/MS	789700000	789700000	0	0	6.2793	52139000	40953000	46114000	1.836	1.6684	0.63329
Q13242;A8K3M9;H0YIB4;S4R3G0;B4DFT9	17;17;5;17;17	Q13242	Q13242	Serine/arginine-rich splicing factor 9	SRSF9		1	68.1429	5.15258e-10	136.99	96.931	136.99	1	68.1429	5.15258e-10	136.99	0.999978	46.52	9.36393e-05	89.029	1	64.9426	6.26156e-10	134.66		1	Y	SGWADERGGEGDGRIYVGNLPTDVREKDLED	X;X;X;X;X;X;X;X;X;X;X;X;X;X;X;B2;X;X;X;X;X;X;X;X;X;X;X;X;X;X;X	XXXXXXXXXXXXXXPPPPPPPPPPPXXXXXX	IY(1)VGNLPTDVR	IY(68.14)VGN(-68.14)LPT(-118.73)D(-126.16)VR(-136.99)	2	2	-0.79727	By MS/MS	By MS/MS	By MS/MS	1165500000	1165500000	0	0	0.88586	345390000	282280000	434770000	1.2167	0.55506	0.83097
Q0VGA5;Q53HA4;Q5T5C7;P49591	267;267;267;267	Q0VGA5	Q0VGA5	Serine--tRNA ligase, cytoplasmic	SARS		0.999764	37.3814	5.4939e-10	116.51	94.425	90.759	0.999614	34.442	5.4939e-10	116.51	0.999764	37.3814	9.00705e-06	90.759	0.999631	34.442	5.4939e-10	116.51		1	Y	GKGSEKSDDNSYDEKYLIATSEQPIAALHRD	X;X;X;X;X;X;X;X;X;X;X;X;X;X;X;B2;X;X;X;X;X;X;X;X;X;X;X;X;X;X;X	XXXXXXXXXXXXXXXPPPPPPPPPPPPPPPX	Y(1)LIATSEQPIAALHR	Y(37.38)LIAT(-37.38)S(-43.14)E(-53.75)Q(-67.4)PIAALH(-89.57)R(-90.76)	1	3	1.2734	By MS/MS	By MS/MS	By MS/MS	94934000	94934000	0	0	2.9938	31757000	33917000	29260000	3.0529	3.8627	2.3356
Q6FGJ9;P21266;A0A0A0MTN3;Q59EJ5;A4UJ43	37;37;37;43;37	Q6FGJ9	Q6FGJ9	Glutathione S-transferase Mu 3	GSTM3		0.866157	8.15024	7.52136e-10	132.01	118.05	132.01	0.666225	7.6854	0.00555098	45.28	0.807741	6.35151	0.000166345	85.29	0.866157	8.15024	7.52136e-10	132.01		1	Y	RLLLEFTDTSYEEKRYTCGEAPDYDRSQWLD	X;X;X;X;X;X;X;X;X;X;X;X;X;X;X;B2;X;X;X;X;X;X;X;X;X;X;X;X;X;X;X	XXXXXXXXXXXXXXXPPPPPPPPPPPXXXXX	Y(0.866)T(0.133)C(0.001)GEAPDYDR	Y(8.15)T(-8.15)C(-28.46)GE(-65.74)APD(-110.56)Y(-122.23)D(-127.4)R(-132.01)	1	2	-1.0288	By MS/MS	By MS/MS	By MS/MS	500600000	500600000	0	0	1.0782	99857000	184920000	215820000	1.2861	0.85682	1.2633
V9HWE9;P09211;C7DJS1	109;109;53	V9HWE9	V9HWE9	Glutathione S-transferase P	HEL-S-22;GSTP1		0.883351	8.93781	8.347e-10	101.15	89.659	101.15	0.872495	8.75012	1.14159e-07	91.457	0.883351	8.93781	8.347e-10	101.15	0.86359	8.70733	1.34047e-07	90.714		1	Y	NDGVEDLRCKYISLIYTNYEAGKDDYVKALP	X;X;X;X;X;X;X;X;X;X;X;X;X;X;X;B2;B2;X;B2;X;X;X;X;X;X;X;X;X;X;X;X	XXXXXXXXXXPPPPPPPPPPPPPPPPPPXXX	YIS(0.002)LIY(0.883)T(0.113)N(0.002)YEAGKDDYVK	Y(-34.17)IS(-27)LIY(8.94)T(-8.94)N(-27.68)Y(-36.04)E(-48.58)AGK(-67.05)D(-74)D(-80.5)Y(-80.21)VK(-79.61)	6	3	-1.1643	By MS/MS	By MS/MS	By MS/MS	3405300000	3405300000	0	0	5.9377	788810000	735790000	889580000	7.2769	3.626	3.3929
B2RAH5;O14974;H0YIS3;H0YIM2	901;901;152;84	B2RAH5	B2RAH5	Protein phosphatase 1 regulatory subunit;Protein phosphatase 1 regulatory subunit 12A	PPP1R12A		0.825811	7.62083	8.92252e-10	100.77	94.27	100.77	0.825811	7.62083	8.92252e-10	100.77										1	Y	SISRYETSSTSAGDRYDSLLGRSGSYSYLEE	X;X;X;X;B2;X;X;X;X;X;X;X;X;X;X;B2;X;X;X;X;X;X;B2;X;X;X;X;X;X;X;X	XXXXPPPPPPPPPPPPPPPPPPXXXXXXXXX	YETSSTS(0.001)AGD(0.003)R(0.143)Y(0.826)D(0.018)S(0.003)LLGR(0.007)	Y(-90.78)E(-83.8)T(-65.13)S(-51.89)S(-45.18)T(-38.3)S(-31.25)AGD(-24.06)R(-7.62)Y(7.62)D(-16.74)S(-24.06)LLGR(-20.97)	12	3	-2.3754	By MS/MS			51808000	51808000	0	0	NaN	51808000	0	0	NaN	NaN	NaN
Q53FT8;A0A140VK45;P20618;Q59GN1	133;133;133;138	Q53FT8	Q53FT8	Proteasome subunit beta type;Proteasome subunit beta type-1	PSMB1		0.831042	7.65636	9.83533e-10	101.89	84.863	86.573	0.416034	0	1.28888e-07	92.19	0.831042	7.65636	3.26673e-07	86.772	0.772359	7.16888	9.83533e-10	101.89		1	Y	AMLSTILYSRRFFPYYVYNIIGGLDEEGKGA	X;X;X;X;X;X;X;X;X;X;X;X;X;X;X;B2;X;X;X;X;X;X;X;X;X;X;X;X;X;X;X	XXXXXXXXXXPPPPPPPPPPPPPPPPPPPXX	R(0.011)FFPY(0.143)Y(0.831)VY(0.015)N(0.001)IIGGLDEEGK	R(-18.93)FFPY(-7.66)Y(7.66)VY(-17.55)N(-28.56)IIGGLD(-60.66)E(-64.97)E(-72.26)GK(-78.58)	6	3	0.89455		By MS/MS	By MS/MS	507600000	507600000	0	0	2.6327	0	280350000	227250000	0	NaN	2.2759
Q53FT8;A0A140VK45;P20618;Q59GN1	135;135;135;140	Q53FT8	Q53FT8	Proteasome subunit beta type;Proteasome subunit beta type-1	PSMB1		0.759002	5.57015	9.83533e-10	101.89	84.863	50.358	0.759002	5.57015	1.28888e-07	92.19	0.701709	5.27958	3.26673e-07	86.772	0.311604	0	9.83533e-10	101.89		1	Y	LSTILYSRRFFPYYVYNIIGGLDEEGKGAVY	X;X;X;X;X;X;X;X;X;X;X;X;X;X;X;B2;X;X;X;X;X;X;X;X;X;X;X;X;X;X;X	XXXXXXXXPPPPPPPPPPPPPPPPPPPXXXX	R(0.001)FFPY(0.005)Y(0.012)VY(0.759)N(0.21)IIGGLD(0.011)E(0.001)EGK	R(-27.77)FFPY(-22.16)Y(-18)VY(5.57)N(-5.57)IIGGLD(-18.47)E(-27.71)E(-32.78)GK(-37.42)	8	3	2.5239	By matching	By MS/MS		204440000	204440000	0	0	1.0603	82945000	121500000	0	0.89227	NaN	0
A0A2R8YEA7;Q8WVW5;Q53G99;Q1KLZ0;P63261;P60709;B4E335;B4E3A4;Q53GK6;Q53G76;B4DVQ0;B4DW52;A0A2R8Y793;B3KWQ3;Q6PJ43;B7ZAP6;I3L3I0;I3L1U9;I3L4N8;V9HVZ7	76;186;198;198;198;198;174;179;198;198;156;170;182;76;86;117;198;198;189;46	A0A2R8YEA7;Q8WVW5	Q8WVW5	Actin, cytoplasmic 2;Actin, cytoplasmic 2, N-terminally processed;Actin, cytoplasmic 1;Actin, cytoplasmic 1, N-terminally processed	PS1TP5BP1;ACTG1;ACTB;HEL-176		0.999994	52.5619	1.13241e-09	151.5	128.42	151.5	0.999962	44.1644	2.19966e-09	133.86	0.999994	52.5619	1.13241e-09	151.5	0.999859	38.5849	1.07414e-06	111.61		1	Y	RDLTDYLMKILTERGYSFTTTAEREIVRDIK	X;X;X;X;X;B2;X;X;X;X;X;X;X;X;X;B2;X;X;X;X;X;X;X;X;X;X;X;X;X;X;X	XXXXXXXXXXXXXXPPPPPPPPPPXXXXXXX	GY(1)SFTTTAER	GY(52.56)S(-52.56)FT(-97.53)T(-113.77)T(-128.42)AE(-146.53)R(-151.5)	2	2	-0.55571	By MS/MS	By MS/MS	By MS/MS	8292600000	8292600000	0	0	803.34	1655200000	2504500000	3037400000	999.84	997.83	493.31
Q86VP6;A8K8U1;A0A0C4DGH5;B3KMG3	980;980;520;208	Q86VP6	Q86VP6	Cullin-associated NEDD8-dissociated protein 1	CAND1		0.887627	9.50005	1.28093e-09	128.38	97.813	128	0.837923	7.33473	1.28093e-09	128.38	0.887627	9.50005	5.32283e-09	128						1	Y	TLLPRLKGYLISGSSYARSSVVTAVKFTISD	X;X;X;X;X;X;X;X;X;X;X;X;X;X;X;B2;X;X;X;X;X;X;X;X;X;X;X;X;X;X;X	XXXXXXXPPPPPPPPPPPXXXXXXXXXXXXX	GYLISGSS(0.012)Y(0.888)AR(0.1)	GY(-124.64)LIS(-67.56)GS(-34.85)S(-18.52)Y(9.5)AR(-9.5)	9	2	-0.05794	By MS/MS	By MS/MS		58338000	58338000	0	0	7.1192	24609000	33729000	0	NaN	8.5519	0
Q9BTY7;Q96BK8	175;41	Q9BTY7	Q9BTY7	Protein HGH1 homolog	HGH1;C8orf30A		0.862476	7.97369	1.53099e-09	106.66	71.908	106.66	0.862476	7.97369	1.53099e-09	106.66	0.860704	7.90917	2.09488e-06	74.296	0.830736	6.90903	3.10851e-06	71.316		1	Y	RALCTPGYNARAPLHYLAPLLSNLSQRPAAR	X;X;X;X;X;X;X;X;X;X;X;X;X;X;X;B2;X;X;X;X;X;X;X;X;X;X;X;X;X;X;X	XXXXXXXXXXXPPPPPPPPPPPPPPPPXXXX	APLH(0.138)Y(0.862)LAPLLSNLSQR	APLH(-7.97)Y(7.97)LAPLLS(-80.11)N(-89.23)LS(-99.3)Q(-101.56)R(-102.62)	5	3	0.81468	By MS/MS	By MS/MS	By MS/MS	517160000	517160000	0	0	22.054	112430000	162710000	181200000	NaN	9.2225	31.204
J3KTL2;Q07955;A8K1L8;J3KSR8;A0A2I7N9Y9;B7Z570	189;189;189;84;55;84	J3KTL2	J3KTL2	Serine/arginine-rich splicing factor 1	SRSF1		0.987552	18.9948	1.53779e-09	138.06	105.71	138.06	0.798082	5.97196	2.78347e-06	107.69	0.987552	18.9948	1.53779e-09	138.06	0.910127	10.3066	4.07878e-05	90.761		1	Y	KLDNTKFRSHEGETAYIRVKVDGPRSPSYGR	X;X;X;X;X;X;X;X;X;X;X;X;X;X;X;B2;X;X;X;X;X;X;X;X;X;X;X;X;X;X;X	XXXXXXXXPPPPPPPPPPXXXXXXXXXXXXX	SHEGETAY(0.988)IR(0.012)	S(-134.9)H(-134.9)E(-106.83)GE(-77.15)T(-61.38)AY(18.99)IR(-18.99)	8	2	0.1437	By MS/MS	By MS/MS	By MS/MS	287480000	287480000	0	0	1.7345	76559000	129540000	81382000	2.9269	2.9507	0.85056
B4DUI2;D3DQR0;Q9UKS6;A0A0C4DGG1	372;373;372;372	B4DUI2	B4DUI2	Protein kinase C and casein kinase substrate in neurons protein 3	PACSIN3		0.90851	10.0843	1.77948e-09	110.08	93.164	98.105	0.457303	0	7.61883e-06	81.92	0.906619	10.5772	1.77948e-09	110.08	0.90851	10.0843	8.97292e-07	98.105		1	Y	ESPRKAATGVRVRALYDYAGQEADELSFRAG	X;X;X;X;X;X;X;X;X;X;X;X;X;X;X;B2;X;X;X;X;X;X;X;X;X;X;X;X;X;X;X	XXXXXXXXXXXXXPPPPPPPPPPPPPPPPXX	ALY(0.909)D(0.089)Y(0.002)AGQEADELSFR	ALY(10.08)D(-10.08)Y(-25.81)AGQ(-54.56)E(-60.96)AD(-72.09)E(-83.21)LS(-94.88)FR(-98.1)	3	2	-1.8309		By MS/MS	By MS/MS	79950000	79950000	0	0	3.4226	0	32374000	47575000	0	NaN	3.8555
Q08J23	609	Q08J23	Q08J23	tRNA (cytosine(34)-C(5))-methyltransferase	NSUN2		0.624767	6.14851	1.77948e-09	110.08	89.207	91.961	0.624767	6.14851	3.85166e-06	91.961	0.537765	3.02176	1.77948e-09	110.08	0.302099	0	6.72575e-06	88.021		1	Y	GEEFDCAFRLAQEGIYTLYPFINSRIITVSM	X;X;X;X;X;X;X;X;X;X;X;X;X;X;X;B2;X;X;X;X;X;X;X;X;X;X;X;X;X;X;X	XXXXXXXXXPPPPPPPPPPPPPPPPXXXXXX	LAQ(0.152)E(0.112)GIY(0.625)T(0.112)LYPFINSR	LAQ(-6.15)E(-7.48)GIY(6.15)T(-7.48)LY(-31.47)PFIN(-70.09)S(-78.98)R(-78.76)	7	2	-1.0897	By MS/MS	By MS/MS		104890000	104890000	0	0	NaN	73415000	31473000	0	NaN	NaN	NaN
K7EJE8;K7EKE6;B3KU28;Q2VPA0;B4DPX0;B3KXS5;E5KMI6;P36776;A4VCH6	180;196;196;199;244;274;310;310;91	K7EJE8	K7EJE8	Lon protease homolog, mitochondrial;Lon protease homolog	LONP1		0.941088	12.0759	1.83836e-09	136.16	86.342	136.16	0.941088	12.0759	1.83836e-09	136.16					0.622471	2.17196	2.76554e-09	130.27		1	Y	EIVKTIRDIIALNPLYRESVLQMMQAGQRVV	X;X;X;X;X;X;X;X;X;X;X;X;X;X;X;B2;X;X;X;X;X;X;X;X;X;X;X;X;X;X;X	XXXXXXXPPPPPPPPPPXXXXXXXXXXXXXX	DIIALN(0.001)PLY(0.941)R(0.058)	D(-131.19)IIALN(-32.24)PLY(12.08)R(-12.08)	9	2	-0.83012	By MS/MS		By MS/MS	104900000	104900000	0	0	NaN	49071000	0	55831000	NaN	NaN	NaN
F5H5D3;Q9BQE3;Q53GA7;B7Z1K5;A0A1W2PQM2;F8VVB9;P68363;B3KPS3;B3KT06;B4DDU2;C9JDS9;P68366;Q71U36;B4DQK4;Q1ZYQ1;P0DPH8;P0DPH7;Q6PEY2;Q9UQM3	342;272;272;342;142;232;272;237;237;119;119;272;272;206;272;272;272;272;149	F5H5D3;P68363;P68366;Q71U36;Q9UQM3	F5H5D3	Tubulin alpha-1C chain;Tubulin alpha-1B chain;Tubulin alpha-4A chain;Tubulin alpha-1A chain;Tubulin alpha-3E chain	TUBA1C;TUBA1B;TUBA4A;TUBA1A;TUBA2;TUBA3E		0.87276	8.36287	1.8648e-09	109.72	71.429	92.773	0.598544	1.77089	3.30443e-05	61.444	0.87276	8.36287	1.08428e-06	96.334	0.80968	6.28835	1.8648e-09	109.72		1	Y	TNLVPYPRIHFPLATYAPVISAEKAYHEQLS;TNLVPYPRIHFPLATYAPVISAEKAYHEQLT	X;X;X;X;X;B2;X;X;X;X;X;X;X;X;X;B2;X;X;X;X;X;X;X;X;X;B2;B2;X;X;X;X	XXXXXXXXPPPPPPPPPPPPPPPPXXXXXXX	IHFPLAT(0.127)Y(0.873)APVISAEK	IH(-55.33)FPLAT(-8.36)Y(8.36)APVIS(-57.06)AE(-66.81)K(-71.68)	8	3	0.65478	By MS/MS	By MS/MS	By MS/MS	16816000000	16816000000	0	0	5.4157	141470000	3705200000	5304000000	0.19412	3.5631	3.9688
Q9BWF3;E9PB51;A8K9U0	327;217;327	Q9BWF3	Q9BWF3	RNA-binding protein 4	RBM4		0.803139	7.5864	1.93401e-09	86.982	78.05	86.982					0.803139	7.5864	1.93401e-09	86.982	0.246837	0.491017	8.71523e-05	43.801		1	Y	RRATAPVPTVGEGYGYGHESELSQASAAARN	X;X;X;X;X;X;X;X;X;X;X;X;X;X;X;B2;X;X;X;X;X;X;X;X;X;X;X;X;X;X;X	XXPPPPPPPPPPPPPPPPPPPPPPPPPPPPX	ATAPVPT(0.005)VGE(0.025)GY(0.14)GY(0.803)GH(0.025)E(0.001)SELSQASAAAR	AT(-33.43)APVPT(-22.25)VGE(-15.01)GY(-7.59)GY(7.59)GH(-15.01)E(-30.07)S(-36.84)E(-43.37)LS(-55.61)Q(-61.26)AS(-71.37)AAAR(-70.71)	14	3	-0.093747		By MS/MS		114390000	114390000	0	0	1.658	0	114390000	0	0	4.437	0
B3KNG6;A0A024R755;H0Y875;B3KQK3;Q6IAW5;O43852;B3KQF5	263;263;95;67;263;263;263	B3KNG6;Q6IAW5	Q6IAW5	Calumenin	CALU		0.780102	8.68217	1.98117e-09	109.24	93.346	109.24	0.64962	7.48193	3.85166e-06	91.961	0.780102	8.68217	1.98117e-09	109.24	0.616669	6.84303	8.91861e-07	98.156		1	Y	KMDKEETKDWILPSDYDHAEAEARHLVYESD	X;X;X;X;X;X;X;X;X;X;X;X;X;X;X;B2;X;X;X;X;X;X;X;X;X;X;X;B2;X;X;X	XXXXXXXXPPPPPPPPPPPPPPPPXXXXXXX	DWILPS(0.106)D(0.106)Y(0.78)D(0.008)HAEAEAR	D(-48.75)W(-48.75)ILPS(-8.68)D(-8.68)Y(8.68)D(-19.83)H(-32.58)AE(-51.4)AE(-58.95)AR(-67.95)	8	2	-1.5344	By MS/MS	By MS/MS	By MS/MS	210760000	210760000	0	0	0.053539	45803000	97926000	67034000	0.029537	0.083641	0.055165
Q6IAV3;K7EM18;P41567;Q6FG85;O60739;Q53F41	30;30;30;30;30;30	Q6IAV3;Q6FG85	Q6IAV3	Eukaryotic translation initiation factor 1;Eukaryotic translation initiation factor 1b	SUI1;EIF1;GC20;EIF1B		0.888198	10.0207	1.98117e-09	109.24	90.924	109.24	0.87063	9.42418	4.92195e-06	80.979	0.888198	10.0207	1.98117e-09	109.24	0.853588	8.43865	7.23372e-07	99.752		1	Y	DASKGDDLLPAGTEDYIHIRIQQRNGRKTLT;DATKGDDLLPAGTEDYIHIRIQQRNGRKTLT	X;X;X;X;X;X;X;X;X;X;X;X;X;X;X;B2;X;X;X;X;X;X;X;X;X;X;X;X;X;X;X	XXXXPPPPPPPPPPPPPPPPXXXXXXXXXXX	GDDLLPAGT(0.002)E(0.012)D(0.088)Y(0.888)IH(0.009)IR	GD(-90.61)D(-84.38)LLPAGT(-27.07)E(-18.58)D(-10.02)Y(10.02)IH(-19.83)IR(-38.75)	12	2	-0.12598	By MS/MS	By MS/MS	By MS/MS	966340000	966340000	0	0	1.7951	132730000	188440000	100680000	0.67601	0.83369	0.86842
Q6NTA2;A0A384N6C7;P14866;B2R959;B4DPK8	30;47;47;16;16	Q6NTA2	Q6NTA2	Heterogeneous nuclear ribonucleoprotein L	HNRNPL		0.994961	22.9549	2.28346e-09	133.33	110.02	133.33	0.986974	18.7949	4.95873e-05	89.542	0.978131	16.5057	6.50169e-08	126.62	0.994961	22.9549	2.28346e-09	133.33		1	Y	MVKMAAAGGGGGGGRYYGGGSEGGRAPKRLK	X;X;X;X;X;X;X;X;X;X;X;X;X;X;X;B2;X;X;X;X;X;X;X;X;X;X;X;X;X;X;X	XXXXXXXXXXXXXXXPPPPPPPPPPXXXXXX	Y(0.995)Y(0.005)GGGSEGGR	Y(22.95)Y(-22.95)GGGS(-99.93)E(-110.94)GGR(-128.55)	1	2	-1.332	By MS/MS	By MS/MS	By MS/MS	1611400000	1611400000	0	0	2549.8	405380000	348270000	240260000	NaN	551.09	NaN
V9HWC3;O00764;F2Z2Y4;G1UI32	84;84;44;84	V9HWC3	V9HWC3	Pyridoxal kinase	HEL-S-1a;PDXK		0.776166	5.9448	2.63414e-09	131.11	114.33	131.11	0.776166	5.9448	2.63414e-09	131.11					0.775805	5.96479	1.32102e-06	113.66		1	Y	LRLNNMNKYDYVLTGYTRDKSFLAMVVDIVQ	X;X;X;X;X;X;X;X;X;X;X;X;X;X;X;B2;X;X;X;X;X;X;X;X;X;X;X;X;X;X;X	XXXXXXXXPPPPPPPPPPXXXXXXXXXXXXX	YDYVLTGY(0.776)T(0.197)R(0.026)	Y(-124.44)D(-120.82)Y(-100.85)VLT(-34.44)GY(5.94)T(-5.94)R(-14.73)	8	2	-1.2815	By MS/MS		By MS/MS	829270000	829270000	0	0	23.868	498320000	0	215680000	51.963	0	17.592
Q15717	200	Q15717	Q15717	ELAV-like protein 1	ELAVL1		0.984763	19.3621	2.7099e-09	116.63	101.97	116.63	0.984763	19.3621	2.7099e-09	116.63	0.814883	8.28829	7.79055e-05	81.311	0.946905	13.2295	3.42908e-08	106.58		1	Y	ANPNQNKNVALLSQLYHSPARRFGGPVHHQA	X;X;X;X;X;X;X;X;X;X;X;X;X;X;X;B2;X;X;X;X;X;X;X;X;X;X;X;X;X;X;X	XXXXXXXPPPPPPPPPPPPPPXXXXXXXXXX	NVALLSQ(0.001)LY(0.985)H(0.011)S(0.003)PAR	N(-99.33)VALLS(-51.54)Q(-29.88)LY(19.36)H(-19.36)S(-25.88)PAR(-35.68)	9	3	-0.0084906	By MS/MS	By MS/MS	By MS/MS	1157700000	1157700000	0	0	18.19	171410000	191210000	346650000	6.7502	4.9985	NaN
P62277;J3KMX5;E9PS50	18;18;18	P62277	P62277	40S ribosomal protein S13	RPS13		0.898487	9.46993	2.71979e-09	130.56	67.903	130.56	0.893232	9.22524	1.7916e-06	111.74	0.898487	9.46993	2.71979e-09	130.56	0.855186	7.71252	1.08065e-06	114.64		1	Y	RMHAPGKGLSQSALPYRRSVPTWLKLTSDDV	X;X;X;X;X;X;X;X;X;X;X;X;X;X;X;B2;X;X;X;X;X;X;X;X;X;X;X;X;X;X;X	XXXXXXXPPPPPPPPPPXXXXXXXXXXXXXX	GLSQSALPY(0.898)R(0.102)	GLS(-109.03)Q(-67.9)S(-61.36)ALPY(9.47)R(-9.47)	9	2	-0.64859	By MS/MS	By MS/MS	By MS/MS	688030000	688030000	0	0	9.433	177410000	242440000	250560000	8.9699	9.1894	9.3571
A0A140VK41;P11908;B2R860;H7C540;B1ALA9;Q53FW2;P60891;A0A2R8Y7H4;B7ZB02	248;245;245;100;212;245;245;245;41	A0A140VK41;B1ALA9	B1ALA9	Ribose-phosphate pyrophosphokinase 2;Ribose-phosphate pyrophosphokinase 1	PRPS2;PRPS1		0.999948	42.892	4.15285e-09	106.35	70.69	106.35	0.999948	42.892	4.15285e-09	106.35	0.99895	30.2222	1.49798e-06	82.248	0.99436	23.3144	0.000118453	55.864		1	Y	CHAADKLLSAGATKVYAILTHGIFSGPAISR;CHAADKLLSAGATRVYAILTHGIFSGPAISR	X;X;X;X;X;X;X;X;X;X;X;X;X;X;X;B2;X;X;X;X;X;X;X;X;X;X;X;X;X;X;X	XXXXXXXXXXXXXXPPPPPPPPPPPPPPPPP	VY(1)AILTHGIFSGPAISR	VY(42.89)AILT(-42.89)H(-65.63)GIFS(-97.26)GPAIS(-104.55)R(-105.45)	2	3	-3.1139	By MS/MS	By MS/MS	By MS/MS	402330000	402330000	0	0	0.36823	107670000	167500000	127160000	0.37342	0.40848	0.32257
E9PKG1;A0A3S6H812;A0A3S6H7X4;Q99873;A0A3Q8AM27;A0A3S6H7E9;A0A3Q8ATF5;A0A3Q8APW9;Q5U8W9;A0A3S6H7G3;A0A3Q8B022;A0A3Q8APX7;A0A3Q8AIR8;A0A3S6H7Z6;A0A3Q8B027;A0A3Q8BCI7;A0A3S6H7Y4;A0A3S6H942;A0A3S6H960;A0A3S6H765;A0A3S6H8A6;A0A3Q8APY3;A0A3Q8BCJ2;A0A3S6H7K8;A0A3Q8AIS2;A0A3S6H950;A0A3S6H824;A0A3Q8B4M4;A0A3Q8AIS5;A0A3Q8B9M1;A0A3S6H7Y8;A0A3S6H8W3;A0A3S6H7E4;A0A3S6H8B5;A0A3Q8AX88;A0A3S6H7X9;A0A3S6H7W7;A0A3…	322;380;398;368;316;346;298;316;324;328;346;259;277;225;273;291;303;321;195;207;225;225;229;239;247;259;269;277;182;200;104;138;156;213;231;243;261;161;179;179;191;209;209	E9PKG1	E9PKG1	Protein arginine N-methyltransferase 1	PRMT1;HRMT1L2		0.871348	9.13262	4.35252e-09	117.02	107.92	91.549	0.70095	7.92343	0.0027156	46.706	0.871348	9.13262	0.000111385	91.549	0.868808	8.59096	4.35252e-09	117.02		1	Y	LDFKGQLCELSCSTDYRMR____________	X;X;X;X;X;X;X;X;X;X;X;X;X;X;X;B2;X;X;X;X;X;X;X;X;X;X;X;X;X;X;X	XXXXPPPPPPPPPPPPPXXXXXXXXXXXXXX	GQLCELSCST(0.003)D(0.019)Y(0.871)R(0.106)	GQ(-88.82)LC(-78.2)E(-72.31)LS(-56.86)C(-50.15)S(-33.18)T(-24.95)D(-16.61)Y(9.13)R(-9.13)	12	2	-0.31769	By MS/MS	By MS/MS	By MS/MS	105410000	105410000	0	0	0.929	31514000	31401000	42500000	0.98654	0.82226	0.98065
F6U211;A0A2R8Y7H1;A0A2R8YFH6;A0A1W2PQS6;P46783;A0A2R8Y6L3;Q59GE4;S4R435	68;68;68;68;68;68;77;44	F6U211	F6U211	40S ribosomal protein S10	RPS10;RPS10-NUDT3		0.744918	6.06723	4.74472e-09	108.97	92.044	108.97					0.41964	0	2.14061e-06	96.464	0.744918	6.06723	4.74472e-09	108.97		1	Y	KSRGYVKEQFAWRHFYWYLTNEGIQYLRDYL	X;X;X;X;X;X;X;X;X;X;X;X;X;X;X;B2;X;X;X;X;X;X;X;X;X;X;X;X;B2;X;X	XXXXXXXXXXXXXPPPPPPPPPPPPPPPXXX	H(0.013)FY(0.745)W(0.184)Y(0.046)LT(0.012)N(0.001)EGIQYLR	H(-17.66)FY(6.07)W(-6.07)Y(-12.11)LT(-18.11)N(-31.08)E(-41.74)GIQ(-43.75)Y(-43.75)LR(-53.76)	3	3	-1.4772			By MS/MS	56310000	56310000	0	0	0.025517	0	0	56310000	0	0	0.047295
F5H6I7;B4DXC4;Q6DD88	281;281;299	F5H6I7	F5H6I7	Atlastin-3	ATL3		0.974043	15.8173	6.48267e-09	110.64	80.319	110.64	0.954642	13.9051	1.60179e-05	74.21	0.972856	15.6317	1.81034e-06	101.56	0.974043	15.8173	6.48267e-09	110.64		1	Y	DIAGEFKEQLQALIPYVLNPSKLMEKEINGS	X;X;X;X;X;X;X;X;X;X;X;X;X;X;X;B2;X;X;X;X;X;X;X;X;X;X;X;X;X;X;X	XXXXXXXPPPPPPPPPPPPPPPXXXXXXXXX	EQLQALIPY(0.974)VLN(0.026)PSK	E(-95.86)Q(-95.86)LQ(-75.44)ALIPY(15.82)VLN(-15.82)PS(-34.33)K(-40.85)	9	2	-1.5949	By MS/MS	By MS/MS	By MS/MS	493900000	493900000	0	0	NaN	102760000	54280000	237180000	NaN	NaN	NaN
B4DPP0;A6NNI4;A0A2R8Y478;G8JLH6;P21926	61;79;79;171;148	B4DPP0	B4DPP0	Tetraspanin;CD9 antigen	CD9		0.891803	9.25143	8.56504e-09	95.122	82.689	91.729	0.891803	9.25143	6.26195e-08	91.729	0.836724	7.32061	8.56504e-09	95.122						1	Y	KTKDEPQRETLKAIHYALNCCGLAGGVEQFI	X;X;X;X;X;X;X;X;X;X;X;X;X;X;X;B2;X;X;X;X;X;X;X;X;X;X;X;X;X;X;X	XXXXXXXXXXXXPPPPPPPPPPPPPPPPPPP	AIH(0.106)Y(0.892)ALN(0.002)CCGLAGGVEQFISDICPK	AIH(-9.25)Y(9.25)ALN(-26.77)C(-34.58)C(-42.09)GLAGGVE(-61.42)Q(-60.85)FIS(-77.49)D(-79.65)IC(-88.95)PK(-90.89)	4	3	-1.8763	By MS/MS	By MS/MS		334300000	334300000	0	0	8.573	109260000	225040000	0	NaN	16.411	0
A0A0C4DGB5;A0A1S5UZ18;Q59HE3;F8W7E0;H0YA91;D6RGF7;D6RBR1;E7EN75;H0Y944;E9PSG1	46;46;67;61;44;46;46;46;56;61	A0A0C4DGB5	A0A0C4DGB5		CAST		0.5	0	8.62201e-09	128.58	116.43	128.58	0.499951	0	0.0126312	58.63	0.499991	0	0.00212628	82.831	0.5	0	8.62201e-09	128.58		1	Y	EKKAASLGSSQSSRTYAGGTASATKVSASSG	X;X;X;X;X;X;X;X;X;X;X;X;X;X;X;X;X;X;X;X;X;X;X;X;X;X;X;X;X;X;X	XXXXXXXXXXXXXXXXXXXXXXXXXXXXXXX	T(0.5)Y(0.5)AGGTASATK	T(0)Y(0)AGGT(-91.81)AS(-118.49)AT(-126.61)K(-128.58)	2	2	-0.35361	By MS/MS	By MS/MS	By MS/MS	93814000	93814000	0	0	NaN	18745000	34035000	41034000	NaN	NaN	NaN
P61160;Q8IY98;F5H6T1;B4DHK9;B4DWQ5	72;17;17;20;17	P61160	P61160	Actin-related protein 2	ACTR2		0.83126	7.05035	1.02795e-08	110.84	87.409	106.62	0.83126	7.05035	1.02795e-08	106.62	0.826267	6.89741	6.69154e-06	94.465	0.49957	0	3.84941e-08	110.84		1	Y	VGDEASELRSMLEVNYPMENGIVRNWDDMKH	X;X;X;X;X;X;X;X;X;X;X;X;X;X;X;B2;X;X;X;X;X;X;X;X;X;X;X;X;X;X;X	XXXXXXXXXPPPPPPPPPPPPPPPXXXXXXX	SMLE(0.004)VN(0.164)Y(0.831)PMENGIVR	S(-54.86)M(-54.86)LE(-22.74)VN(-7.05)Y(7.05)PM(-33.77)E(-49.27)N(-58.18)GIVR(-74.1)	7	2	-0.61256	By MS/MS	By MS/MS		95936000	95936000	0	0	NaN	44561000	51375000	0	NaN	NaN	NaN
Q6IBR8;P20042;B5BU01;Q96I16	298;298;298;179	Q6IBR8	Q6IBR8	Eukaryotic translation initiation factor 2 subunit 2	EIF2S2		1	72.2852	1.41388e-08	114.71	111.11	114.71	0.999996	55.354	1.40729e-05	97.779	1	72.2852	1.41388e-08	114.71	0.999999	61.7299	3.93934e-08	109.72		1	Y	TCRSPDTILQKDTRLYFLQCETCHSRCSVAS	X;X;X;X;X;X;X;X;X;X;X;B2;X;X;X;B2;X;X;X;X;X;X;X;X;X;X;X;X;X;X;X	XXXXXXXXXXXXXXPPPPPPPPPPPPXXXXX	LY(1)FLQCETCHSR	LY(72.29)FLQ(-72.29)C(-82.99)E(-90.36)T(-96.64)C(-105.82)H(-112.18)S(-113.92)R(-114.71)	2	3	-1.3435	By MS/MS	By MS/MS	By MS/MS	327550000	327550000	0	0	8.2253	95537000	100110000	131910000	6.4839	6.2643	14.483
A0A384MDR8;P11177;C9J634;F8WF02	63;63;45;63	A0A384MDR8	A0A384MDR8	Pyruvate dehydrogenase E1 component subunit beta, mitochondrial	PDHB		0.805034	9.78843	1.4377e-08	88.441	69.661	88.441	0.788172	9.39221	7.8429e-06	68.069	0.545324	2.72979	0.000648352	46.926	0.805034	9.78843	1.4377e-08	88.441		1	Y	ERDEKVFLLGEEVAQYDGAYKVSRGLWKKYG	X;X;X;X;X;X;X;X;X;X;X;X;X;X;X;B2;X;X;X;X;X;X;X;X;X;X;X;X;X;X;X	XXXXXPPPPPPPPPPPPPPPPXXXXXXXXXX	VFLLGEEVAQ(0.085)Y(0.805)D(0.085)GAY(0.011)K(0.014)	VFLLGE(-57.01)E(-47.85)VAQ(-9.79)Y(9.79)D(-9.79)GAY(-18.46)K(-17.46)	11	2	-1.4609	By MS/MS	By MS/MS	By MS/MS	195800000	195800000	0	0	1.0454	41218000	28255000	48492000	0.8279	0.45917	0.63818
B4DKX4;B2R6E2;Q53EL6	395;409;409	B4DKX4	B4DKX4	Programmed cell death protein 4	PDCD4		0.860061	8.58089	2.0338e-08	95.206	75.729	95.206	0.839479	8.00275	2.0338e-08	74.048	0.860061	8.58089	2.78325e-08	95.206	0.460065	0	5.52902e-07	86.625		1	Y	STITVDQMKRGYERIYNEIPDINLDVPHSYS	X;X;X;X;X;X;X;X;X;X;X;X;X;X;X;B2;X;X;X;X;X;X;X;X;X;X;X;X;X;X;X	XXXXXXXXXXXXXXPPPPPPPPPPPPPPPPP	IY(0.86)N(0.119)E(0.02)IPDINLDVPHSYSVLER	IY(8.58)N(-8.58)E(-16.23)IPD(-36.29)IN(-53.8)LD(-69.95)VPH(-85.39)S(-88.74)Y(-91.48)S(-93.51)VLE(-94.67)R(-95.21)	2	3	1.1943	By MS/MS	By MS/MS		104540000	104540000	0	0	0.25385	15738000	88802000	0	0.18183	0.55948	0
Q59G75;P41252;A0A0A0MSX9;Q7Z3U5;J3KR24;Q7Z355;Q6P0M4	451;434;434;434;324;324;279	Q59G75	Q59G75	Isoleucine--tRNA ligase, cytoplasmic	IARS;DKFZp686L0869;DKFZp686L17145		0.634278	5.40221	2.07073e-08	115.23	92.402	115.23					0.634278	5.40221	2.07073e-08	115.23						1	Y	VENMVDQLLRNNDLCYWVPELVREKRFGNWL	X;X;X;X;X;X;X;X;X;X;X;X;X;X;X;B2;X;X;X;X;X;X;X;X;X;X;X;X;X;X;X	XXXXXXXXXXPPPPPPPPPPPPPXXXXXXXX	NNDLC(0.183)Y(0.634)W(0.183)VPELVR	N(-56.99)N(-56.99)D(-41.07)LC(-5.4)Y(5.4)W(-5.4)VPE(-58.6)LVR(-87.37)	6	2	0.016836		By MS/MS		86164000	86164000	0	0	0.91838	0	86164000	0	0	1.9091	NaN
P38159;B4E352;B3KRG5;H3BUY5;Q2VIN3;Q96E39	304;265;169;176;304;304	P38159;Q2VIN3	P38159	RNA-binding motif protein, X chromosome;RNA-binding motif protein, X chromosome, N-terminally processed;RNA binding motif protein, X-linked-like-1	RBMX;RBMXL1		0.839729	7.22743	2.28405e-08	126.31	90.433	116.52	0.583183	5.81229	0.000378438	77.192	0.839729	7.22743	1.92848e-07	116.52	0.81881	6.56636	2.28405e-08	126.31		1	Y	GNSRSAPLTRGPPPSYGGSSRYDDYSSSRDG;GNSRSAPPTRGPPPSYGGSSRYDDYSSSRDG	X;X;X;X;X;X;X;X;X;X;X;X;X;X;X;B2;X;X;X;X;X;B2;X;X;X;X;X;X;X;X;X	XXXXXXXXXXPPPPPPPPPPPXXXXXXXXXX	GPPPS(0.159)Y(0.84)GGS(0.001)SR	GPPPS(-7.23)Y(7.23)GGS(-29.85)S(-36.35)R(-36.08)	6	2	-0.0167	By MS/MS	By MS/MS	By MS/MS	1051800000	1051800000	0	0	120.19	304290000	393440000	347720000	566.1	70.4	132.48
A0A140VJZ1;P45974	128;128	A0A140VJZ1	A0A140VJZ1	Ubiquitin carboxyl-terminal hydrolase 5	USP5		0.91407	11.6154	2.58471e-08	114.5	59.102	109.66	0.864893	8.7706	0.000127866	90.108	0.91407	11.6154	6.73894e-08	109.66	0.87838	9.09987	2.58471e-08	114.5		1	Y	KFELDEDVKIVILPDYLEIARDGLGGLPDIV	X;X;X;X;X;X;X;X;X;X;X;X;X;X;X;B2;X;X;X;X;X;X;X;X;X;X;X;X;X;X;X	XXXXXXXXXPPPPPPPPPPPPXXXXXXXXXX	IVILPD(0.063)Y(0.914)LE(0.023)IAR	IVILPD(-11.62)Y(11.62)LE(-16.01)IAR(-44.36)	7	2	-0.62132	By MS/MS	By MS/MS	By MS/MS	115600000	115600000	0	0	NaN	36853000	36868000	34264000	NaN	NaN	NaN
G3V1B8;H0YEB6;O60232	32;63;69	G3V1B8	G3V1B8	Sjoegren syndrome/scleroderma autoantigen 1	SSSCA1		0.933298	13.289	2.91784e-08	76.777	68.068	62.377	0.933298	13.289	1.35775e-07	62.377	0.799427	7.25896	3.30677e-08	75.703	0.871748	13.857	2.91784e-08	76.777		1	Y	ADCGTILLQDKQRKIYCVACQELDSDVDKDN	X;X;X;X;X;X;X;X;X;X;X;X;X;X;X;B2;X;X;X;X;X;X;X;X;X;X;X;X;X;X;X	XXXXXXXXXXXXXXPPPPPPPPPPPPPPPPP	IY(0.933)C(0.044)VAC(0.003)Q(0.003)E(0.003)LD(0.003)S(0.003)D(0.003)VD(0.003)K(0.003)D(0.001)NPALNAQAALSQAR	IY(13.29)C(-13.29)VAC(-25.36)Q(-25.36)E(-25.36)LD(-25.36)S(-25.36)D(-25.36)VD(-25.36)K(-25.36)D(-30.3)N(-35.01)PALN(-47.67)AQ(-56.77)AALS(-62.22)Q(-62.21)AR(-62.38)	2	3	-1.6818	By MS/MS	By MS/MS	By MS/MS	270560000	270560000	0	0	2.037	43886000	53805000	94115000	1.3085	1.4962	1.4863
A0A2R8YEA7;Q8WVW5;Q53G99;Q1KLZ0;P63261;P60709;B4E3A4;Q53GK6;Q53G76;B4DW52;A0A2R8Y793;B3KWQ3;Q6PJ43;B7ZAP6;I3L3I0;I3L1U9;I3L4N8;A0AUL6;Q562R8;Q562P0;Q562N2;Q562Z6;Q562Z7;Q562Y6;Q562X9;Q562N8;Q562N0;Q562L5;Q562S0;Q562U2;Q562Y8;Q562M5;Q562M3;Q562L9	44;154;166;166;166;166;147;166;166;138;150;44;54;85;166;166;157;59;83;83;83;83;83;83;83;83;83;83;83;83;83;83;83;83	A0A2R8YEA7;Q8WVW5;Q562Z7;Q562L9	Q8WVW5	Actin, cytoplasmic 2;Actin, cytoplasmic 2, N-terminally processed;Actin, cytoplasmic 1;Actin, cytoplasmic 1, N-terminally processed	PS1TP5BP1;ACTG1;ACTB;ACT		0.699293	7.16485	3.0875e-08	80.359	67.171	66.447	0.307094	5.66646	1.69205e-06	59.282	0.699293	7.16485	5.21515e-08	69.248	0.497477	6.5536	3.0875e-08	80.359		1	Y	IVMDSGDGVTHTVPIYEGYALPHAILRLDLA	X;X;X;X;X;X;X;X;X;X;X;X;X;X;X;B2;B2;X;X;X;X;X;X;X;X;X;X;X;X;X;X	PPPPPPPPPPPPPPPPPPPPPPPPPPPXXXX	T(0.001)T(0.001)GIVM(0.023)D(0.023)S(0.023)GD(0.023)GVT(0.023)H(0.023)T(0.023)VPIY(0.699)E(0.134)GY(0.005)ALPHAILR	T(-29.46)T(-29.46)GIVM(-14.86)D(-14.86)S(-14.86)GD(-14.86)GVT(-14.86)H(-14.86)T(-14.86)VPIY(7.16)E(-7.16)GY(-21.52)ALPH(-45.15)AILR(-48.34)	19	4	-2.0864	By matching	By MS/MS		1269500000	1269500000	0	0	0.13872	434410000	640500000	0	0.19862	0.28353	0
Q9UPE4;Q53G69;O43615;M0QXU7	164;201;201;169	Q9UPE4	Q9UPE4	Mitochondrial import inner membrane translocase subunit TIM44	hTIM44;TIMM44		0.877535	8.55948	3.71268e-08	110.53	98.812	110.53					0.877535	8.55948	3.71268e-08	110.53						1	Y	VKKEIDDSVLGQTGPYRRPQRLRKRTEFAGD	X;X;X;X;X;X;X;X;X;X;X;X;X;X;X;B2;X;X;X;X;X;X;X;X;X;X;X;X;X;X;X	XXXPPPPPPPPPPPPPPXXXXXXXXXXXXXX	EIDDSVLGQTGPY(0.878)R(0.122)	E(-107.74)ID(-100.65)D(-100.65)S(-99.44)VLGQ(-51.83)T(-36.65)GPY(8.56)R(-8.56)	13	2	-1.7719		By MS/MS		15046000	15046000	0	0	0.49832	0	15046000	0	0	1.3459	0
Q53FS0;O96019;Q6FI97	186;186;186	Q53FS0	Q53FS0	Actin-like protein 6A	ACTL6A;BAF53A		0.789258	6.76022	3.76079e-08	79.382	57.825	72.035	0.761448	6.3106	3.76079e-08	79.382	0.662692	4.87809	1.99947e-05	47.616	0.789258	6.76022	9.46035e-08	72.035		1	Y	DSGATHTTAIPVHDGYVLQQGIVKSPLAGDF	X;X;X;X;X;X;X;X;X;X;X;X;X;X;X;B2;X;X;X;X;X;X;X;X;X;X;X;X;X;X;X	PPPPPPPPPPPPPPPPPPPPPPPPXXXXXXX	STGLILDSGATHTTAIPVH(0.041)D(0.166)GY(0.789)VLQ(0.002)Q(0.001)GIVK	S(-59.38)T(-59.38)GLILD(-41.22)S(-41.22)GAT(-41.22)H(-41.22)T(-36.15)T(-36.15)AIPVH(-12.85)D(-6.76)GY(6.76)VLQ(-26.13)Q(-31.94)GIVK(-34.4)	22	4	0.46586	By MS/MS	By MS/MS	By MS/MS	890890000	890890000	0	0	NaN	185680000	353400000	247790000	NaN	NaN	NaN
A0A140VJS9;P62136;C0STL0	317;306;12	A0A140VJS9	A0A140VJS9	Serine/threonine-protein phosphatase PP1-alpha catalytic subunit	PPP1CA		0.99986	38.5328	4.04155e-08	112.8	66.673	112.8	0.99986	38.5328	4.04155e-08	112.8	0.999653	34.7444	0.000156413	88.495	0.999542	33.3904	2.31801e-05	98.044		1	Y	CSFQILKPADKNKGKYGQFSGLNPGGRPITP	X;X;X;X;X;X;X;X;X;X;X;X;X;X;X;B2;X;X;X;X;X;X;X;X;X;X;X;X;X;X;X	XXXXXXXXXXXXXXXPPPPPPPPPPPPXXXX	Y(1)GQFSGLNPGGR	Y(38.53)GQ(-38.53)FS(-65.6)GLN(-97.55)PGGR(-112.8)	1	2	-0.38833	By MS/MS	By MS/MS	By MS/MS	146660000	146660000	0	0	NaN	32255000	48521000	44612000	NaN	NaN	NaN
A0A024R6W2;O43809;B2R6U8;Q5HYH5	24;24;24;24	A0A024R6W2	A0A024R6W2	Cleavage and polyadenylation specificity factor subunit 5	NUDT21;DKFZp313O211		0.999909	40.4368	4.11433e-08	110.98	51.996	110.98	0.998412	28.7224	0.000331144	65.295	0.999748	35.9917	9.92764e-08	108.47	0.999909	40.4368	4.11433e-08	110.98		1	Y	SQTGWPRGVTQFGNKYIQQTKPLTLERTINL	X;X;X;X;X;X;X;X;X;X;X;X;X;X;X;B2;X;X;X;X;X;X;X;X;X;X;X;X;X;X;X	XXXXXXXXXXXXXXXPPPPPPPPPPPPXXXX	Y(1)IQQTKPLTLER	Y(40.44)IQ(-40.44)Q(-66.15)T(-76.79)K(-86.46)PLT(-107.66)LE(-109.79)R(-110.98)	1	3	-1.2412	By MS/MS	By MS/MS	By MS/MS	247200000	247200000	0	0	NaN	112900000	45625000	32048000	NaN	NaN	NaN
A0A024RDR0;P09429;Q5T7C4;B7Z965;Q59GW1;A0A286R9D9;B3KQ05	109;109;109;109;111;88;70	A0A024RDR0	A0A024RDR0	High mobility group protein B1	HMGB1		0.913243	14.3996	4.39558e-08	106.19	90.375	102.39	0.810195	6.63177	1.15559e-06	99.238	0.913243	14.3996	4.53779e-07	102.39	0.692596	5.0268	4.39558e-08	106.19		1	Y	APKRPPSAFFLFCSEYRPKIKGEHPGLSIGD	X;X;X;X;X;X;X;X;X;X;X;X;X;X;X;B2;X;X;X;X;X;X;B2;X;X;X;X;X;X;X;X	XXXPPPPPPPPPPPPPPPPXXXXXXXXXXXX	RPPSAFFLFCS(0.01)E(0.033)Y(0.913)R(0.033)PK(0.01)	R(-99.47)PPS(-97.09)AFFLFC(-36.88)S(-19.55)E(-14.4)Y(14.4)R(-14.4)PK(-19.55)	13	3	-0.78961	By MS/MS	By MS/MS	By MS/MS	4543400000	4543400000	0	0	2.7402	750160000	562330000	793690000	1.1532	0.8962	2.0882
Q9NZ63;Q6GVN4;Q9P0Q6	147;68;72	Q9NZ63	Q9NZ63	Uncharacterized protein C9orf78	C9orf78		0.925953	15.6012	4.69185e-08	108.7	91.783	108.7	0.857514	8.5407	6.17629e-05	91.937	0.811287	11.3185	0.000110118	73.951	0.925953	15.6012	4.69185e-08	108.7		1	Y	HEEQKVKPKNAEDCLYELPENIRVSSAKKTE	X;X;X;X;X;X;X;X;X;X;X;X;X;X;X;B2;X;X;X;X;X;X;X;X;X;X;X;X;X;X;X	XXXXXXXXXPPPPPPPPPPPPPPXXXXXXXX	N(0.006)AE(0.004)D(0.025)C(0.025)LY(0.926)E(0.013)LPENIR	N(-21.8)AE(-23.34)D(-15.6)C(-15.6)LY(15.6)E(-18.65)LPE(-67.97)N(-76.37)IR(-89.57)	7	2	-0.65996	By MS/MS	By MS/MS	By MS/MS	209440000	209440000	0	0	2.5894	60160000	78803000	70475000	4.8083	4.4664	1.3893
B4DEM9;Q9Y2S7	150;168	B4DEM9	B4DEM9	Polymerase delta-interacting protein 2	POLDIP2		0.88173	18.0546	4.9802e-08	56.252	44.172	56.252									0.88173	18.0546	4.9802e-08	56.252		1	Y	EAVTFLANHDDSRALYAIPGLDYVSHEDILP	X;X;X;X;X;X;X;X;X;X;X;X;X;X;X;B2;X;X;X;X;X;X;X;X;X;X;X;X;X;X;X	XXXXXXXXXXXXXPPPPPPPPPPPPPPPPPP	ALY(0.882)AIPGLD(0.014)Y(0.014)VS(0.014)H(0.014)E(0.014)D(0.014)ILPY(0.014)T(0.014)S(0.005)T(0.002)D(0.002)QVPIQHELFER	ALY(18.05)AIPGLD(-18.05)Y(-18.05)VS(-18.05)H(-18.05)E(-18.05)D(-18.05)ILPY(-18.05)T(-18.05)S(-22.89)T(-27.52)D(-27.52)Q(-36.43)VPIQ(-51.92)H(-53.7)E(-54.98)LFE(-56.15)R(-56.25)	3	4	-1.0105			By MS/MS	99806000	99806000	0	0	NaN	0	0	99806000	NaN	NaN	NaN
A8K8D9;A0A384NL00;P11413;Q2VF42;B4DYA7;A0A4P8W0G4;Q0PHS1;E7EUI8;E7EM57;Q0PHS6;Q2Q9H2;Q2Q9B7	249;249;249;209;249;160;196;250;250;34;209;209	A8K8D9;Q2Q9H2	A8K8D9	Glucose-6-phosphate 1-dehydrogenase	G6PD		0.999991	50.8342	5.052e-08	107.47	84.725	92.538	0.999991	50.8342	3.80175e-05	93.143	0.999601	33.996	6.70336e-06	103.42	0.999987	49.2417	5.052e-08	107.47		1	Y	ILTFKEPFGTEGRGGYFDEFGIIRDVMQNHL	X;X;X;X;X;X;X;X;X;X;X;X;X;X;X;B2;X;X;X;X;X;X;X;X;X;X;X;X;X;X;X	XXXXXXXXXXXXXPPPPPPPPPPPXXXXXXX	GGY(1)FDEFGIIR	GGY(50.83)FD(-50.83)E(-63.96)FGIIR(-92.02)	3	3	-1.51	By MS/MS	By MS/MS	By MS/MS	1788700000	1788700000	0	0	13.311	538740000	494580000	645270000	12.334	11.821	13.207
E9KL35;P63244;J3KPE3;D6RAC2;H0YAF8;H0Y8W2;D6REE5;H0YAM7;D6RF23;H0Y8R5;H0Y9P0	246;246;202;198;127;177;264;153;30;104;20	E9KL35	E9KL35	Guanine nucleotide-binding protein subunit beta-2-like 1;Guanine nucleotide-binding protein subunit beta-2-like 1, N-terminally processed	GNB2L1		0.795942	5.91129	6.04245e-08	110.47	89.604	109.79	0.795942	5.91129	6.63071e-08	109.79	0.499999	0	7.19046e-05	90.434	0.757636	4.95002	6.04245e-08	110.47		1	Y	DGGDIINALCFSPNRYWLCAATGPSIKIWDL	X;X;X;X;X;X;X;X;X;X;X;X;X;X;X;B2;X;X;X;X;X;X;X;X;X;X;X;X;X;X;X	XXXXXXXXXXXXXXXPPPPPPPPPPPPXXXX	Y(0.796)W(0.204)LCAATGPSIK	Y(5.91)W(-5.91)LC(-63.38)AAT(-97.21)GPS(-106.09)IK(-109.79)	1	2	-0.68082	By MS/MS	By MS/MS	By MS/MS	3510300000	3510300000	0	0	65.814	128370000	224250000	54482000	NaN	NaN	1.0215
P49327;A0A0U1RQF0	2454;2452	P49327	P49327	Fatty acid synthase;[Acyl-carrier-protein] S-acetyltransferase;[Acyl-carrier-protein] S-malonyltransferase;3-oxoacyl-[acyl-carrier-protein] synthase;3-oxoacyl-[acyl-carrier-protein] reductase;3-hydroxyacyl-[acyl-carrier-protein] dehydratase;Enoyl-[acyl-carrier-protein] reductase;Oleoyl-[acyl-carrier-protein] hydrolase	FASN		0.606254	6.42761	6.06894e-08	94.463	88.907	94.463	0	0		NaN					0.606254	6.42761	6.06894e-08	94.463		1	Y	YHGNVMLLRAKTGGAYGEDLGADYNLSQVCD	X;X;X;X;X;X;X;X;X;X;X;X;X;X;X;B2;X;X;X;X;X;X;X;X;X;X;X;X;X;X;X	XXXXXXXXXXXPPPPPPPPPPPPPPPPPPPP	T(0.138)GGAY(0.606)GE(0.117)D(0.138)LGADYNLSQVCDGK	T(-6.43)GGAY(6.43)GE(-7.14)D(-6.43)LGAD(-31.28)Y(-38.88)N(-46.23)LS(-60.12)Q(-73.09)VC(-87.35)D(-91.19)GK(-91.78)	5	3	-0.52636			By MS/MS	46620000	46620000	0	0	0.50455	0	0	46620000	NaN	0	1.1018
Q6FI51;Q6FHS4;P25685;M0R080;Q59E89;Q9UDY4;B4DNN2;M0R1D6;M0QZD0;M0QYT3;M0QXK0	176;176;176;76;179;172;57;76;76;76;109	Q6FI51;Q59E89	Q59E89	DnaJ homolog subfamily B member 1;DnaJ homolog subfamily B member 4	DNAJB1;DNAJB4		0.969862	15.4804	6.63071e-08	109.79	84.316	109.79	0.969862	15.4804	6.63071e-08	109.79	0.760675	5.27491	2.38039e-05	97.813	0.93962	12.3538	0.000112712	90.964		1	Y	DPPVIHELRVSLEEIYSGCTKRMKISRKRLN;DPPVTHDLRVSLEEIYSGCTKKMKISHKRLN	X;X;X;X;X;X;X;X;X;X;X;X;X;X;X;B2;X;X;X;X;X;X;X;X;X;X;X;X;X;X;X	XXXXXXXXXPPPPPPPPPPPPXXXXXXXXXX	VSLEEIY(0.97)S(0.027)GC(0.002)TK(0.001)	VS(-95.33)LE(-71.04)E(-49.69)IY(15.48)S(-15.48)GC(-27.84)T(-33.69)K(-31.68)	7	2	-0.87896	By MS/MS	By MS/MS	By MS/MS	1105600000	1105600000	0	0	24.055	240710000	396120000	468820000	16.121	28.819	27.121
E9PJ81;E9PRQ7;A0A024R598;A0A024R539;Q04323;B4E0P8;A0A087WTZ5;E9PS08	179;175;179;179;179;82;120;37	E9PJ81	E9PJ81	UBX domain-containing protein 1	UBXN1;LOC51035		0.9713	17.6108	6.96233e-08	58.858	48.2	58.858	0.9713	17.6108	6.96233e-08	58.858										1	Y	VREKIERDKAERAKKYGGSVGSQPPPVAPEP	X;X;X;X;X;X;X;X;X;X;X;X;X;X;X;B2;X;X;X;X;X;X;X;X;X;X;X;X;X;X;X	XXXXXXXXXXXXXXXPPPPPPPPPPPPPPPP	Y(0.971)GGS(0.017)VGS(0.006)Q(0.006)PPPVAPEPGPVPSSPSQEPPTKR	Y(17.61)GGS(-17.61)VGS(-22.19)Q(-22.19)PPPVAPE(-39.62)PGPVPS(-53.9)S(-53.9)PS(-57.18)Q(-57.18)E(-57.18)PPT(-58.81)K(-58.81)R(-58.86)	1	3	0.4244	By MS/MS			15198000	15198000	0	0	NaN	15198000	0	0	NaN	NaN	NaN
F5H5D3;Q9BQE3;Q53GA7;B7Z1K5;P68363;A8JZY9;B3KPS3;B3KT06;B4DDU2;B4DN58;P68366;Q71U36;B4DQK4;Q1ZYQ1;P0DPH8;P0DPH7;Q6PEY2;Q9UQM3	478;408;408;478;408;408;373;373;255;139;408;408;342;408;408;408;408;285	F5H5D3;P68363;P68366;Q71U36;Q9UQM3	F5H5D3	Tubulin alpha-1C chain;Tubulin alpha-1B chain;Tubulin alpha-4A chain;Tubulin alpha-1A chain;Tubulin alpha-3E chain	TUBA1C;TUBA1B;TUBA4A;TUBA1A;TUBA2;TUBA3E		0.899022	10.6127	7.3065e-08	71.241	65.208	71.241	0.772367	6.71953	0.000673609	50.957	0.627357	6.04656	0.000337968	43.598	0.899022	10.6127	7.3065e-08	71.241		1	Y	HKFDLMYAKRAFVHWYVGEGMEEGEFSEARE	X;B2;X;X;X;X;B2;X;B2;B2;X;X;X;X;X;B2;X;X;X;X;X;X;X;X;X;X;X;X;X;X;X	XXXXXXXXXXPPPPPPPPPPPPPPPPPPPPX	AFVH(0.008)W(0.078)Y(0.899)VGE(0.014)GMEEGEFSEAR	AFVH(-20.68)W(-10.61)Y(10.61)VGE(-17.99)GM(-34.96)E(-34.96)E(-34.96)GE(-42.91)FS(-49.48)E(-49.48)AR(-57.28)	6	2	2.6146	By matching	By MS/MS	By MS/MS	327840000	327840000	0	0	0.035214	63591000	264250000	0	0.021377	0.079306	0
B4DGF8;Q8N684;F5H669;J3QT54;F5H6M0;F5H047;C9JM38;C9J286;C9J323;F5H5B7;F5H1W4;F5H2K8;F5H6P5;F5H6A8;F5GXA3	72;72;72;72;72;72;72;72;72;72;72;72;72;72;72	B4DGF8	B4DGF8	Cleavage and polyadenylation specificity factor subunit 7	CPSF7		0.823719	9.58836	7.37068e-08	108.93	82.82	108.93					0.823719	9.58836	7.37068e-08	108.93						1	Y	QEPSPKPNNKTPAILYTYSGLRNRRAAVYVG	X;X;X;X;X;X;X;X;X;X;X;X;X;X;X;B2;X;X;X;X;X;X;X;X;X;X;X;X;X;X;X	XXXXXXXXXXPPPPPPPPPPPPXXXXXXXXX	TPAILY(0.824)T(0.091)Y(0.067)S(0.018)GLR(0.001)	T(-81.45)PAILY(9.59)T(-9.59)Y(-10.89)S(-16.69)GLR(-29.44)	6	2	0.30747		By MS/MS		53171000	53171000	0	0	2.7803	0	53171000	0	0	NaN	0
B7Z6P1;A8K3K1;P68133;P68032;Q7Z7J6;A6NL76;D2JYH4;P63267;P62736;B3KW67;Q13707;B4DUI8;F8WB63;B8ZZJ2;C9JFL5;F6UVQ4;F6QUT6;B7Z6I1	71;71;71;71;71;71;71;70;71;70;71;26;70;70;70;71;71;71	B7Z6P1	B7Z6P1	Actin, alpha skeletal muscle;Actin, alpha cardiac muscle 1;Actin, gamma-enteric smooth muscle;Actin, aortic smooth muscle	ACTA1;ACTC1;ACTA2;ACTG2		0.987002	19.0173	7.86625e-08	68.44	60.636	68.44	0.984009	20.0815	7.86625e-08	53.073	0.987002	19.0173	7.54928e-06	68.44	0.90972	14.6839	9.12648e-07	65.779		1	Y	VGDEAQSKRGILTLKYPIEHGIITNWDDMEK	X;X;X;X;X;X;B2;B2;X;X;X;X;X;X;X;B2;X;X;X;X;X;X;X;X;X;X;X;X;X;X;X	XXXXXXXXXXXXXXXPPPPPPPPPPPPPPPP	Y(0.987)PIE(0.012)HGIITNWDDMEK	Y(19.02)PIE(-19.02)H(-34.05)GIIT(-40.16)N(-39.68)W(-46.21)D(-52.3)D(-57.83)M(-62.6)E(-67.02)K(-68.44)	1	2	-1.1376	By MS/MS	By MS/MS	By MS/MS	924290000	924290000	0	0	0.066296	223490000	474870000	214380000	0.087395	0.086	0.036566
Q8IZ29;P68371;Q8IWP6;Q8N6N5;B3KML9;B4DNW1	50;50;50;50;50;50	Q8IZ29	Q8IZ29	Tubulin beta-4B chain	TUBB2C;TUBB4B		0.996864	27.0336	8.96154e-08	107.08	94.311	106.16	0.996864	27.0336	1.22069e-06	106.16	0.996048	25.1278	8.96154e-08	107.08	0.993443	22.7037	8.14249e-05	92.732		1	Y	TYHGDSDLQLERINVYYNEATGGKYVPRAVL	B2;B2;B2;X;B2;X;X;X;X;X;X;X;X;X;X;B2;X;X;X;X;X;X;X;X;X;X;X;X;X;X;X	XXXXXXXXXXXXPPPPPPPPPPPPXXXXXXX	IN(0.002)VY(0.997)Y(0.001)NEATGGK	IN(-27.03)VY(27.03)Y(-29.35)N(-54.89)E(-66.94)AT(-86.4)GGK(-98.78)	4	2	-0.47452	By MS/MS	By MS/MS	By MS/MS	6535000000	6535000000	0	0	NaN	1540900000	1905200000	1846500000	NaN	NaN	NaN
Q9BT67	147	Q9BT67	Q9BT67	NEDD4 family-interacting protein 1	NDFIP1		0.999999	60.3257	9.54035e-08	107.06	80.671	107.06	0.997025	25.7457	0.00210969	43.761	0.999999	60.3257	9.54035e-08	107.06	0.999968	44.9681	2.10335e-05	99.752		1	Y	GFFLSFCLTTSAAGRYGAISGFGLSLIKWIL	X;X;X;X;X;X;X;X;X;X;X;X;X;X;X;B2;X;X;X;X;X;X;X;X;X;X;X;X;X;X;X	XXXXXXXXXXXXXXXPPPPPPPPPPPPPXXX	Y(1)GAISGFGLSLIK	Y(60.33)GAIS(-60.33)GFGLS(-92.56)LIK(-104.44)	1	2	-0.80484	By MS/MS	By MS/MS	By MS/MS	549800000	549800000	0	0	5.2922	15740000	29108000	17077000	0.74863	1.2203	0.28939
F5H5D3;Q9BQE3;Q53GA7;B7Z1K5;Q8N532;A0A1W2PQM2	352;282;282;352;152;152	F5H5D3	F5H5D3	Tubulin alpha-1C chain	TUBA1C		0.823677	7.58963	1.05602e-07	91.883	77.113	90.475					0.823677	7.58963	1.44972e-07	90.475	0.791578	6.86976	1.05602e-07	91.883		1	Y	FPLATYAPVISAEKAYHEQLTVAEITNACFE	X;X;X;X;B2;B2;X;X;X;X;X;X;X;X;X;B2;X;X;X;X;X;X;X;X;X;X;X;X;X;X;X	XXXXXXXXXXXXXXPPPPPPPPPPPPPPPPP	AY(0.824)H(0.143)E(0.026)Q(0.006)LTVAEITNACFEPANQMVK	AY(7.59)H(-7.59)E(-14.94)Q(-21.4)LT(-32.67)VAE(-58.45)IT(-68.53)N(-67.91)AC(-71.37)FE(-79.08)PAN(-88.58)Q(-90.19)M(-90.34)VK(-90.33)	2	3	-1.6545		By MS/MS	By MS/MS	376900000	376900000	0	0	0.62168	0	122570000	254330000	0	0.73973	1.0367
A0A384MEJ3;G8JLB6;P31943;H0YB39	372;372;372;247	A0A384MEJ3	A0A384MEJ3	Heterogeneous nuclear ribonucleoprotein H;Heterogeneous nuclear ribonucleoprotein H, N-terminally processed	HNRNPH1		0.764547	6.17145	1.15742e-07	94.057	85.099	75.533	0.764547	6.17145	4.23818e-05	75.533	0	0		NaN	0.717747	7.3307	1.15742e-07	94.057		1	Y	VELFLNSTAGASGGAYEHRYVELFLNSTAGA	X;X;X;X;X;X;X;X;X;X;X;X;X;X;X;B2;X;X;X;X;X;X;X;X;X;X;X;X;X;X;X	PPPPPPPPPPPPPPPPPPPXXXXXXXXXXXX	YVELFLNSTAGAS(0.003)GGAY(0.765)E(0.185)H(0.039)R(0.009)	Y(-71.66)VE(-62.68)LFLN(-54.94)S(-50.35)T(-45.49)AGAS(-23.97)GGAY(6.17)E(-6.17)H(-12.92)R(-19.45)	17	3	0.26998	By MS/MS		By MS/MS	413000000	413000000	0	0	0.64548	219910000	0	193090000	0.84702	0	13.805
A0A024QZ30;P31040;D6RFM5;A0A087X1I3;Q0QF12;B3KT34;B4DYN5;B3KYA5	436;436;436;291;371;211;436;30	A0A024QZ30	A0A024QZ30	Succinate dehydrogenase [ubiquinone] flavoprotein subunit, mitochondrial	SDHA		0.861734	9.83591	1.43582e-07	74.525	63.42	52.721					0.861734	9.83591	1.43582e-07	52.721	0.742519	5.05545	6.06867e-07	74.525		1	Y	VLRHVNGQDQIVPGLYACGEAACASVHGANR	X;X;X;X;X;X;X;X;X;X;X;X;X;X;X;B2;X;X;X;X;X;X;X;X;X;X;X;X;X;X;X	XXXPPPPPPPPPPPPPPPPPPPPPPPPPPPP	H(0.001)VN(0.002)GQ(0.002)D(0.002)Q(0.004)IVPGLY(0.862)AC(0.089)GE(0.036)AAC(0.002)AS(0.001)VHGANR	H(-32.22)VN(-27.15)GQ(-27.48)D(-27.48)Q(-23.8)IVPGLY(9.84)AC(-9.84)GE(-13.73)AAC(-26.12)AS(-30.32)VH(-36.83)GAN(-36.71)R(-36.58)	13	4	0.23621		By matching	By MS/MS	74637000	74637000	0	0	NaN	0	29943000	44694000	NaN	NaN	NaN
E9PB61;Q86V81	257;250	E9PB61	E9PB61	THO complex subunit 4	ALYREF		0.757774	5.5631	1.61899e-07	88.19	72.247	82.922	0.674215	5.7237	1.61899e-07	88.19					0.757774	5.5631	2.48985e-06	82.922		1	Y	KQQLSAEELDAQLDAYNARMDTS________	X;X;X;X;X;X;X;X;X;X;X;X;X;X;X;B2;X;X;X;X;X;X;X;X;X;X;X;X;X;X;X	XPPPPPPPPPPPPPPPPPPXXXXXXXXXXXX	QQLSAEELDAQ(0.001)LD(0.014)AY(0.758)N(0.21)AR(0.018)	Q(-82.56)Q(-82.56)LS(-78.21)AE(-76.5)E(-64.88)LD(-54.5)AQ(-31.56)LD(-17.45)AY(5.56)N(-5.56)AR(-16.34)	15	3	0.059488	By MS/MS		By MS/MS	338250000	338250000	0	0	NaN	143280000	0	157040000	NaN	NaN	NaN
B2RNR6;Q96KR1;A8K849;Q05D65	109;109;109;109	B2RNR6	B2RNR6	Zinc finger RNA-binding protein	ZFR		0.610441	5.98923	1.65702e-07	56.854	50.35	56.854					0.44685	1.26529	2.23618e-07	54.732	0.610441	5.98923	1.65702e-07	56.854		1	Y	PVAVAAAATAAAYGGYPTAHTATDYGYTQRQ	X;X;X;X;X;X;X;X;X;X;X;X;X;X;X;B2;X;X;X;X;X;X;X;X;X;X;X;X;X;X;X	PPPPPPPPPPPPPPPPPPPPPPPPPPPPPPX	PAPVAVAAAAT(0.154)AAAY(0.154)GGY(0.61)PT(0.075)AH(0.004)T(0.001)ATDYGYTQR	PAPVAVAAAAT(-5.99)AAAY(-5.99)GGY(5.99)PT(-9.1)AH(-21.48)T(-27.24)AT(-32.24)D(-31.8)Y(-36.97)GY(-36.2)T(-36.2)Q(-36.2)R(-36)	18	4	-2.5823			By MS/MS	25751000	25751000	0	0	NaN	0	0	25751000	NaN	NaN	NaN
Q8IVL5	493	Q8IVL5	Q8IVL5	Prolyl 3-hydroxylase 2	LEPREL1		0.544392	1.42214	1.69311e-07	96.489	76.831	96.489									0.544392	1.42214	1.69311e-07	96.489		1	Y	ELHSVASGIMLVGDGYRGKTSPHTPNEKFEG	X;X;X;X;X;X;X;X;X;X;X;X;X;X;X;B2;X;X;X;X;X;X;X;X;X;X;X;X;X;X;X	PPPPPPPPPPPPPPPPPXXXXXXXXXXXXXX	ELHSVASGIMLVGD(0.063)GY(0.544)R(0.392)	E(-91.68)LH(-91.78)S(-86.99)VAS(-75.26)GIM(-44.76)LVGD(-9.35)GY(1.42)R(-1.42)	16	3	0.94678			By MS/MS	27443000	27443000	0	0	NaN	0	0	27443000	NaN	NaN	NaN
Q5R210;Q5R208;A0A024R454;P31327;Q5R206;Q5R209;Q5R207;A0A669KBF2;B7ZAW0	590;590;590;590;590;590;590;84;139	Q5R210	Q5R210	Carbamoyl-phosphate synthase [ammonia], mitochondrial	CPS1		0.852759	7.62799	1.69594e-07	103.88	93.282	103.88	0.499999	0	4.45245e-05	81.625					0.852759	7.62799	1.69594e-07	103.88		1	Y	KAADTIGYPVMIRSAYALGGLGSGICPNRET	X;X;X;X;X;X;X;X;X;X;X;X;X;X;X;B2;X;X;X;X;X;X;X;X;X;X;X;X;X;X;X	XXXXXXXXXXXXXPPPPPPPPPPPPPPPPXX	S(0.147)AY(0.853)ALGGLGSGICPNR	S(-7.63)AY(7.63)ALGGLGS(-81.07)GIC(-97.12)PN(-101.73)R(-103.01)	3	3	-1.296	By MS/MS		By MS/MS	71324000	71324000	0	0	NaN	37446000	0	0	NaN	NaN	NaN
B4DSN3;G5EA31;A0A024QZM6;P53992	294;413;413;413	B4DSN3	B4DSN3	Protein transport protein Sec24C	SEC24C		0.871226	8.49939	1.92602e-07	92.993	80.632	92.993	0.599343	6.37718	0.000175065	49.089	0.871226	8.49939	1.92602e-07	92.993	0.792418	6.67781	8.66388e-05	63.578		1	Y	VIKPLARLPPEEASPYVVDHGESGPLRCNRC	X;X;X;X;X;X;X;X;X;X;X;X;X;X;X;B2;X;X;X;X;X;X;X;X;X;X;X;X;X;X;X	XXXXXXXPPPPPPPPPPPPPPPPPPPPXXXX	LPPEE(0.002)AS(0.123)PY(0.871)VVD(0.003)HGESGPLR	LPPE(-34)E(-26.12)AS(-8.5)PY(8.5)VVD(-25)H(-32.96)GE(-48.18)S(-55.37)GPLR(-54.58)	9	3	-0.79994	By MS/MS	By MS/MS	By MS/MS	104990000	104990000	0	0	4.1311	33039000	38032000	33924000	4.3925	3.4004	5.056
Q7RTQ8;Q7RTQ2;G3V3H3;Q7RTQ0;G3V5R9;Q7RTQ9;Q7RTQ7;G3V2E7;F8W6L3;B4DGB3;Q7RTQ1;Q7RTQ4;Q7RTP8;E7EVH7;Q07866;G5E9S8;B5BU63;B4DS14;Q7Z5D5;A8MZ87;Q9H0B6	307;307;307;303;307;303;303;307;307;307;307;303;303;479;307;305;303;479;307;153;292	Q7RTQ8;Q9H0B6	Q7RTQ8	Kinesin light chain 1;Kinesin light chain 2	KNS2;KLC1;KLC2		0.731776	4.35992	2.01097e-07	86.367	58.26	86.367					0.731776	4.35992	2.01097e-07	86.367						1	Y	DHPAVAATLNNLAVLYGKRGKYKEAEPLCKR	X;X;X;X;X;X;X;X;X;X;X;X;X;X;X;B2;X;X;X;X;X;X;X;X;X;X;X;X;X;X;X	PPPPPPPPPPPPPPPPPPXXXXXXXXXXXXX	DHPAVAATLNNLAVLY(0.732)GK(0.268)	D(-85.97)H(-85.97)PAVAAT(-66.55)LN(-44.5)N(-42.32)LAVLY(4.36)GK(-4.36)	16	3	-0.93208		By MS/MS		189340000	189340000	0	0	NaN	0	189340000	0	NaN	NaN	NaN
Q9H7Z7	127	Q9H7Z7	Q9H7Z7	Prostaglandin E synthase 2;Prostaglandin E synthase 2 truncated form	PTGES2		0.967436	18.5302	2.38636e-07	90.714	67.109	90.714	0.930244	15.3669	3.6805e-05	72.184	0.967436	18.5302	2.38636e-07	90.714	0.93172	14.035	4.82977e-07	85.636		1	Y	FCSKVRAFLDFHALPYQVVEVNPVRRAEIKF	X;X;X;X;X;X;X;X;X;X;X;X;X;X;X;B2;X;X;X;X;X;X;X;X;X;X;X;X;X;X;X	XXXXXXPPPPPPPPPPPPPPPPPPPXXXXXX	AFLD(0.011)FH(0.008)ALPY(0.967)Q(0.014)VVEVNPVR	AFLD(-19.63)FH(-20.62)ALPY(18.53)Q(-18.53)VVE(-41.25)VN(-61.84)PVR(-71.68)	10	3	-0.51733	By MS/MS	By MS/MS	By MS/MS	194200000	194200000	0	0	1.1628	55888000	61229000	77084000	0.80107	1.4299	1.4164
P04350;B4DJ43;M0QYM7;M0R278;Q8IZ29;P68371;Q8IWP6;Q8N6N5;B3KML9;M0R2D3;B4DNW1;M0QY85;M0R0X0;M0QY37;M0QX14;M0QZL7	36;36;36;81;36;36;36;36;36;36;36;36;36;36;36;87	P04350;Q8IZ29	Q8IZ29	Tubulin beta-4A chain;Tubulin beta-4B chain	TUBB4A;TUBB2C;TUBB4B		0.730664	7.44944	2.60349e-07	79.875	72.071	79.875	0.688572	7.44944	4.27878e-07	79.875	0.63288	5.68432	8.02665e-07	78.758	0.730664	7.44944	2.60349e-07	79.875		1	Y	WEVISDEHGIDPTGTYHGDSDLQLERINVYY	X;X;X;X;X;X;X;X;X;X;X;X;X;X;X;B2;X;X;X;X;X;X;X;X;X;X;X;X;X;B2;B2	PPPPPPPPPPPPPPPPPPPPPPPPPPXXXXX	FWEVISDEHGID(0.004)PT(0.02)GT(0.107)Y(0.731)H(0.131)GD(0.005)S(0.001)DLQLER	FW(-59.61)E(-47.71)VIS(-41.94)D(-41.94)E(-41.94)H(-35.61)GID(-22.58)PT(-15.56)GT(-8.35)Y(7.45)H(-7.45)GD(-21.79)S(-28.66)D(-35.06)LQ(-41.03)LE(-39.77)R(-39.45)	17	4	-1.4343	By MS/MS	By MS/MS	By MS/MS	5405800000	5405800000	0	0	0.28521	647480000	929540000	1735900000	0.066688	0.18424	0.41335
A0A384ME17;P49411	269;266	A0A384ME17	A0A384ME17	Elongation factor Tu, mitochondrial	TUFM		0.82517	7.07193	2.86313e-07	90.896	59.014	83.776	0.787316	6.06661	2.86313e-07	90.896	0.82517	7.07193	4.19691e-06	83.776	0.723898	4.36039	3.16272e-05	76.329		1	Y	ARDLEKPFLLPVEAVYSVPGRGTVVTGTLER	X;X;X;X;X;X;X;X;X;X;X;X;X;X;X;B2;X;X;X;X;X;X;X;X;X;X;X;X;X;X;X	XXPPPPPPPPPPPPPPPPPPPXXXXXXXXXX	DLEKPFLLPVE(0.011)AVY(0.825)S(0.162)VPGR(0.002)	D(-71.93)LE(-63.99)K(-64.36)PFLLPVE(-18.69)AVY(7.07)S(-7.07)VPGR(-26.77)	14	3	-0.28378	By MS/MS	By MS/MS	By MS/MS	2011600000	2011600000	0	0	15.734	403210000	462600000	678590000	9.3776	9.4889	18.796
Q13263;B2R8R5;M0R0K9	755;755;380	Q13263	Q13263	Transcription intermediary factor 1-beta	TRIM28		0.928468	11.8001	2.9272e-07	96.306	75.466	96.306	0.772019	8.22632	5.74219e-06	69.602	0.723927	7.00225	2.57618e-06	80.469	0.928468	11.8001	2.9272e-07	96.306		1	Y	LTLIRARLQEKLSPPYSSPQEFAQDVGRMFK	X;X;X;X;X;X;X;X;X;X;X;X;X;X;X;B2;X;X;X;X;X;X;X;X;X;X;X;X;X;X;X	XXXXXXXXXXXPPPPPPPPPPPPPPPPPXXX	LS(0.005)PPY(0.928)S(0.061)S(0.005)PQEFAQDVGR	LS(-22.84)PPY(11.8)S(-11.8)S(-22.84)PQ(-33.38)E(-42.34)FAQ(-42.78)D(-53.75)VGR(-63.81)	5	2	-1.1338	By MS/MS	By MS/MS	By MS/MS	107840000	107840000	0	0	NaN	29793000	27697000	50348000	NaN	NaN	NaN
H7C547;F8WBY4;P54709	20;21;21	H7C547	H7C547	Sodium/potassium-transporting ATPase subunit beta-3	ATP1B3		0.987179	18.8669	3.14872e-07	104.22	86.061	104.22	0.982565	17.5122	9.53974e-06	101.38	0.987179	18.8669	3.14872e-07	104.22	0.845817	7.39969	0.000157379	60.401		1	Y	KKSLNQSLAEWKLFIYNPTTGEFLGRTAKSW	X;X;X;X;X;X;X;X;X;X;X;X;X;X;X;B2;X;X;X;X;X;X;X;X;X;X;X;X;X;X;X	XXXXXXXXXXXXPPPPPPPPPPPPPPXXXXX	LFIY(0.987)N(0.013)PTTGEFLGR	LFIY(18.87)N(-18.87)PT(-52.73)T(-60.91)GE(-74.48)FLGR(-89.25)	4	2	1.605	By MS/MS	By matching	By MS/MS	179360000	179360000	0	0	NaN	43036000	68270000	0	NaN	NaN	NaN
A0A384NKW7;P55060;B4DUC5;B4DM31;B4DPS6;B4DS32	801;801;584;592;490;399	A0A384NKW7	A0A384NKW7	Exportin-2	CSE1L		0.999999	63.3202	3.26173e-07	101.36	70.988	99.752	0.999986	48.5339	3.26173e-07	101.36	0.999999	63.3202	7.23372e-07	99.752	0.999972	46.345	4.54377e-06	82.102		1	Y	FIKSFLVFINLYCIKYGALALQEIFDGIQPK	X;X;X;X;X;X;X;X;X;X;X;X;X;X;X;B2;X;X;X;X;X;X;X;X;X;X;X;X;X;X;X	XXXXXXXXXXXXXXXPPPPPPPPPPPPPPPP	Y(1)GALALQEIFDGIQPK	Y(63.32)GALALQ(-63.32)E(-71.89)IFD(-84.88)GIQ(-94.15)PK(-99.38)	1	2	1.5697	By MS/MS	By MS/MS	By MS/MS	764190000	764190000	0	0	1.9358	65051000	106790000	80630000	0.69	1.1223	0.39269
A0A024R652;P11586;V9GYY3;A0A384N5Y3;F5H2F4;B7Z809	52;52;52;52;52;108	A0A024R652	A0A024R652	C-1-tetrahydrofolate synthase, cytoplasmic;Methylenetetrahydrofolate dehydrogenase;Methenyltetrahydrofolate cyclohydrolase;Formyltetrahydrofolate synthetase;C-1-tetrahydrofolate synthase, cytoplasmic, N-terminally processed	MTHFD1		0.999939	42.6324	3.51168e-07	118.32	99.227	118.32	0	0		NaN	0.999939	42.6324	3.51168e-07	118.32	0.991648	21.7643	0.000953979	67.464		1	Y	RLAILQVGNRDDSNLYINVKLKAAEEIGIKA	X;X;X;X;X;X;X;X;X;X;X;X;X;X;X;B2;X;X;X;X;X;X;X;X;X;X;X;X;X;X;X	XXXXXXXXXXPPPPPPPPPPXXXXXXXXXXX	DDSNLY(1)INVK	D(-84.15)D(-84.15)S(-67.62)N(-51.9)LY(42.63)IN(-42.63)VK(-66.59)	6	2	-1.785	By matching	By MS/MS	By MS/MS	1309400000	1309400000	0	0	34.403	379700000	422060000	412320000	35.095	30.696	30.561
A0A0B4J230;Q9UII2	58;58	A0A0B4J230	A0A0B4J230	ATPase inhibitor, mitochondrial	ATPIF1		0.936748	13.6229	3.61581e-07	120.31	101.04	120.31	0.706636	6.98683	0.0079758	47.869	0.825601	7.6996	0.00328187	50.194	0.936748	13.6229	3.61581e-07	120.31		1	Y	AGGAFGKREQAEEERYFRALGATFCFFAVEA	X;X;X;X;X;X;X;X;X;X;X;X;X;X;X;B2;X;X;X;X;X;X;X;X;X;X;X;X;X;X;X	XXXXXXXXPPPPPPPPPPXXXXXXXXXXXXX	EQAEEE(0.001)R(0.041)Y(0.937)FR(0.022)	E(-114.52)Q(-103.77)AE(-67.37)E(-52.81)E(-32.13)R(-13.62)Y(13.62)FR(-16.29)	8	2	0.38637	By MS/MS	By MS/MS	By MS/MS	276780000	276780000	0	0	NaN	13964000	36705000	32849000	NaN	NaN	NaN
A0A087WY55;Q9NP79;Q5TGM0	251;278;220	A0A087WY55	A0A087WY55	Vacuolar protein sorting-associated protein VTA1 homolog	VTA1		0.986622	18.7106	3.81259e-07	90.379	74.073	82.709	0.986622	18.7106	9.95667e-06	82.709	0.887267	9.30537	8.92547e-05	55.437	0.973076	15.5864	3.81259e-07	90.379		1	Y	RLTPEDFARAQKYCKYAGSALQYEDVSTAVQ	X;X;X;X;X;X;X;X;X;X;X;X;X;X;X;B2;X;X;X;X;X;X;X;X;X;X;X;X;X;X;X	XXXXXXXXXXXXXXXPPPPPPPPPPPPPPPP	Y(0.987)AGS(0.013)ALQYEDVSTAVQNLQK	Y(18.71)AGS(-18.71)ALQ(-44.33)Y(-43.32)E(-48.53)D(-53.54)VS(-62.8)T(-66.98)AVQ(-79.18)N(-81.49)LQ(-82.65)K(-82.7)	1	3	-0.80533	By MS/MS	By MS/MS	By MS/MS	111400000	111400000	0	0	NaN	48592000	30728000	32081000	NaN	NaN	NaN
Q9BU76	84	Q9BU76	Q9BU76	Multiple myeloma tumor-associated protein 2	MMTAG2		0.5	0	4.03929e-07	117.4	100.07	117.4					0.5	0	5.68958e-07	116.73	0.5	0	4.03929e-07	117.4		1	Y	AVREAEREALLAALGYKNVKKQPTGLSKEDF	X;X;X;X;X;X;X;X;X;X;X;X;X;X;X;B2;X;X;X;X;X;X;X;X;X;X;X;X;X;X;X	XXXXXXXPPPPPPPPPPXXXXXXXXXXXXXX	EALLAALGY(0.5)K(0.5)	E(-112.95)ALLAALGY(0)K(0)	9	2	-0.6685		By MS/MS	By MS/MS	181700000	181700000	0	0	NaN	0	48142000	133560000	NaN	NaN	NaN
H3BPG5;H3BV80;H3BMS0;H3BMM9;H3BTC0;D3DU92;Q15287	30;113;184;207;207;207;207	H3BPG5	H3BPG5	RNA-binding protein with serine-rich domain 1	RNPS1		0.902726	12.1942	4.1076e-07	105.46	97.894	49.188	0.756475	5.82915	0.00187267	44.299	0.902726	12.1942	6.69154e-06	94.465	0.86219	10.1742	4.1076e-07	105.46		1	Y	MPVERMHPHLSKGYAYVEFENPDEAEKALKH	X;X;X;X;X;X;X;X;X;X;X;X;X;X;X;B2;X;X;X;X;X;X;X;X;X;X;X;X;X;X;X	XXXXXXXXXXXXPPPPPPPPPPPPPPPXXXX	GY(0.041)AY(0.903)VE(0.054)FE(0.002)N(0.001)PDEAEK	GY(-13.48)AY(12.19)VE(-12.19)FE(-27.77)N(-32.05)PD(-39.62)E(-43.73)AE(-45.09)K(-45.02)	4	3	-0.92742	By MS/MS	By MS/MS	By MS/MS	94469000	94469000	0	0	NaN	21118000	34149000	39202000	NaN	NaN	NaN
A6NLN1;A0A0U1RRM4;P26599;Q59H49;K7EKJ7;K7ES59	83;113;113;130;113;83	A6NLN1	A6NLN1	Polypyrimidine tract-binding protein 1	PTBP1		0.542071	5.57522	4.22085e-07	69.845	64.001	69.845	0	0		NaN	0.542071	5.57522	4.22085e-07	69.845						1	Y	FIEMNTEEAANTMVNYYTSVTPVLRGQPIYI	X;X;X;X;X;X;X;X;X;X;X;X;X;X;X;B2;X;X;X;X;X;X;X;X;X;X;X;X;X;B2;X	PPPPPPPPPPPPPPPPPPPPPPPPPXXXXXX	NQAFIE(0.001)M(0.013)N(0.013)T(0.013)E(0.013)E(0.013)AAN(0.013)T(0.013)M(0.013)VN(0.15)Y(0.542)Y(0.15)T(0.043)S(0.013)VT(0.001)PVLR	N(-47.12)Q(-47.12)AFIE(-27.5)M(-16.36)N(-16.36)T(-16.36)E(-16.36)E(-16.36)AAN(-16.36)T(-16.36)M(-16.36)VN(-5.58)Y(5.58)Y(-5.58)T(-11.03)S(-16.36)VT(-26.6)PVLR(-41.75)	19	3	-2.299	By matching	By MS/MS		533030000	533030000	0	0	6.0391	255100000	277930000	0	9.2783	7	0
Q8N1H4;Q68DZ9;Q59GA1;B2RDQ3;P62995;H7BXF3;H7C2L4	200;224;224;236;236;95;56	Q8N1H4	Q8N1H4	Transformer-2 protein homolog beta	DKFZp686F18120;TRA2B		0.589527	4.92947	4.33749e-07	118.67	105.16	118.67	0	0		NaN	0.589527	4.92947	4.33749e-07	118.67						1	Y	YYDRGYDRGYDDRDYYSRSYRGGGGGGGGWR	X;X;X;X;X;X;X;X;X;X;X;X;X;X;X;B2;X;X;X;X;X;X;X;X;X;X;X;X;X;X;X	XXXXXXXXPPPPPPPPPPXXXXXXXXXXXXX	GYDDRDY(0.189)Y(0.59)S(0.189)R(0.031)	GY(-104.26)D(-93.68)D(-89.36)R(-72.22)D(-37.51)Y(-4.93)Y(4.93)S(-4.93)R(-12.73)	8	2	1.5055		By MS/MS		273130000	273130000	0	0	2.3067	0	273130000	0	0	6.0049	0
Q8IVT2	7	Q8IVT2	Q8IVT2	Mitotic interactor and substrate of PLK1	MISP		1	92.7647	4.35626e-07	109.66	81.458	106.2	1	82.7088	1.17049e-05	96.143	1	95.8547	4.35626e-07	109.66	1	92.7647	9.8448e-07	106.2		1	Y	_________MDRVTRYPILGIPQAHRGTGLV	X;X;X;X;X;X;X;X;X;X;X;X;X;X;X;B2;X;X;X;X;X;X;X;X;X;X;X;X;X;X;X	XXXXXXXXXXXXXXXPPPPPPPPPPPXXXXX	Y(1)PILGIPQAHR	Y(92.76)PILGIPQ(-92.76)AH(-104.06)R(-106.2)	1	3	-0.98069	By MS/MS	By MS/MS	By MS/MS	107390000	107390000	0	0	25.235	29176000	42614000	35595000	11.899	23.63	NaN
A0A024RCA7;P05387	3;3	A0A024RCA7	A0A024RCA7	60S acidic ribosomal protein P2	RPLP2		0.989165	19.92	4.40556e-07	86.517	72.082	73.688	0	0		NaN	0.989165	19.92	7.10541e-05	73.688	0.987406	19.2906	4.40556e-07	86.517		1	Y	_____________MRYVASYLLAALGGNSSP	X;X;X;X;X;X;X;X;X;X;X;X;X;X;X;B2;X;X;X;X;X;X;X;X;X;X;X;X;X;X;X	XXXXXXXXXXXXXXXPPPPPPPPPPPPPPPP	Y(0.989)VAS(0.01)Y(0.001)LLAALGGNSSPSAK	Y(19.92)VAS(-19.92)Y(-31.16)LLAALGGN(-62.02)S(-61.21)S(-65.06)PS(-69.5)AK(-72.29)	1	3	-0.46446	By matching	By matching	By MS/MS	79370000	79370000	0	0	NaN	9444600	32485000	32896000	NaN	NaN	NaN
V9HW95;Q15293;Q5J7V8	320;320;154	V9HW95	V9HW95	Reticulocalbin-1	HEL-S-84;RCN1		0.805943	9.48002	4.42912e-07	73.676	66.395	64.349	0	0		NaN	0.805943	9.48002	4.42912e-07	73.676	0.636794	6.21334	6.2069e-07	72.035		1	Y	ILENWNMFVGSQATNYGEDLTKNHDEL____	X;X;X;X;X;X;X;X;X;X;X;X;X;X;X;B2;X;X;X;X;X;X;X;X;X;X;X;X;X;X;X	PPPPPPPPPPPPPPPPPPPPPPXXXXXXXXX	EEILENWN(0.001)M(0.002)FVGS(0.002)Q(0.002)AT(0.027)N(0.091)Y(0.806)GE(0.038)D(0.016)LT(0.013)K(0.004)	E(-61.9)E(-61.9)ILE(-45.85)N(-45.21)W(-42.44)N(-31.32)M(-26.82)FVGS(-26.82)Q(-26.82)AT(-14.74)N(-9.48)Y(9.48)GE(-13.31)D(-17.06)LT(-18)K(-22.9)	18	3	-1.8973	By matching	By MS/MS	By MS/MS	342710000	342710000	0	0	0.34951	51570000	112220000	58354000	0.19999	0.31026	0.16166
Q5CAQ5;V9HWP2;P14625;B4DU71;B4DHT9	652;652;652;402;317	Q5CAQ5	Q5CAQ5	Endoplasmin	TRA1;HEL-S-125m;HSP90B1		0.804387	10.9459	4.57983e-07	88.176	78.388	61.862	0.804387	10.9459	8.37769e-05	61.862	0.681144	6.33607	5.08404e-07	87.352	0.776944	6.36903	4.57983e-07	88.176		1	Y	SQRLTESPCALVASQYGWSGNMERIMKAQAY	X;X;X;X;X;X;X;X;X;X;X;X;X;X;X;B2;X;X;X;X;X;X;X;X;X;X;X;X;X;X;B2	XXXPPPPPPPPPPPPPPPPPPPPPXXXXXXX	LTE(0.001)S(0.001)PC(0.001)ALVAS(0.065)Q(0.065)Y(0.804)GW(0.055)S(0.006)GNM(0.001)E(0.001)R	LT(-42.91)E(-29.56)S(-29.56)PC(-30.07)ALVAS(-10.95)Q(-10.95)Y(10.95)GW(-11.64)S(-21.05)GN(-32.39)M(-31.65)E(-30.89)R(-32.74)	13	3	-1.1828	By MS/MS	By MS/MS	By MS/MS	396140000	396140000	0	0	3.1846	71446000	101480000	100360000	1.9984	2.4459	2.1286
H3BTD3;A0A024R5U3;H3BMD8;P56211;A6NMQ3;Q5T5H1;O43768;A0A1W2PRU0;H3BQ52	43;59;78;59;87;80;64;62;18	H3BTD3;A6NMQ3	A6NMQ3	cAMP-regulated phosphoprotein 19;Alpha-endosulfine	ARPP19;ARPP-19;ENSA		0.999675	35.0267	4.59516e-07	113.18	106.58	113.18	0.998633	28.8116	0.000146968	86.67	0.999675	35.0267	4.59516e-07	113.18	0.996944	25.148	2.14841e-06	105.94		1	Y	GGSDFLRKRLQKGQKYFDSGDYNMAKAKMKN;LELKEVLRMKSVEQKYFDSGDYNMAKAKMKN	X;X;X;X;X;X;X;X;X;X;X;X;X;X;X;B2;X;X;X;X;X;X;X;X;X;X;X;X;X;X;X	XXXXXXXXXXXXXXXPPPPPPPPPPPXXXXX	Y(1)FDSGDYNMAK	Y(35.03)FD(-35.03)S(-49.76)GD(-64.08)Y(-87.07)N(-99.8)M(-104.71)AK(-113.18)	1	2	-0.45784	By MS/MS	By MS/MS	By MS/MS	239170000	239170000	0	0	NaN	77081000	79402000	82683000	NaN	NaN	NaN
F6U211;A0A2R8Y7H1;A0A2R8YFH6;A0A1W2PQS6;P46783;A0A2R8Y6L3;Q59GE4;S4R435	70;70;70;70;70;70;79;46	F6U211	F6U211	40S ribosomal protein S10	RPS10;RPS10-NUDT3		0.868154	8.79159	5.55375e-07	103.97	88.209	103.97									0.868154	8.79159	5.55375e-07	103.97		1	Y	RGYVKEQFAWRHFYWYLTNEGIQYLRDYLHL	X;X;X;X;X;X;X;X;X;X;X;X;X;X;X;B2;X;X;X;X;X;X;X;X;X;X;B2;X;X;B2;X	XXXXXXXXXXXPPPPPPPPPPPPPPPXXXXX	HFY(0.016)W(0.115)Y(0.868)LTNEGIQYLR	H(-33.3)FY(-17.28)W(-8.79)Y(8.79)LT(-32.42)N(-46.87)E(-60.38)GIQ(-86.91)Y(-93.55)LR(-94.44)	5	3	-0.073975			By MS/MS	52580000	52580000	0	0	0.023827	0	0	52580000	0	0	0.044162
A0A0S2Z4Z0;Q96PK6;Q59GV2	237;237;171	A0A0S2Z4Z0	A0A0S2Z4Z0	RNA-binding protein 14	RBM14		0.776097	8.39153	5.64297e-07	105.03	80.138	105.03					0.776097	8.39153	5.64297e-07	105.03						1	Y	PRASYVAPLTAQPATYRAQPSVSLGAAYRAQ	X;X;X;X;X;X;X;X;X;X;X;X;X;X;X;B2;X;X;X;X;X;X;X;X;X;X;X;B2;B2;X;X	XXPPPPPPPPPPPPPPPXXXXXXXXXXXXXX	ASYVAPLTAQPAT(0.112)Y(0.776)R(0.111)	AS(-102.72)Y(-102.81)VAPLT(-62.48)AQ(-43.6)PAT(-8.39)Y(8.39)R(-8.43)	14	2	0.094251		By MS/MS		37085000	37085000	0	0	1.6736	0	37085000	0	0	4.855	0
H3BLU7;V9HWA2;O43488	215;260;260	H3BLU7	H3BLU7	Aflatoxin B1 aldehyde reductase member 2	AKR7A2;HEL-S-166mP		0.872228	8.71826	5.84695e-07	111.61	103.96	101.9	0	0		NaN	0.831262	9.96064	5.84695e-07	111.61	0.872228	8.71826	9.46085e-06	101.9		1	Y	KQPVGRFFGNSWAETYRNRFWKEHHFEAIAL	X;X;X;X;X;X;X;X;X;X;X;X;X;X;X;B2;X;X;X;X;X;X;X;X;X;X;X;X;X;X;X	XXXXXXPPPPPPPPPPPXXXXXXXXXXXXXX	FFGNSWAET(0.01)Y(0.872)R(0.117)	FFGN(-78.47)S(-70.82)W(-60.02)AE(-35.6)T(-19.25)Y(8.72)R(-8.72)	10	2	0.8433	By matching	By MS/MS	By MS/MS	153820000	153820000	0	0	19.95	47967000	48868000	34443000	NaN	NaN	4.467
P54136;B4DXW6	230;24	P54136	P54136	Arginine--tRNA ligase, cytoplasmic	RARS		0.997785	26.8406	5.96792e-07	111.46	77.905	111.46									0.997785	26.8406	5.96792e-07	111.46		1	Y	TIIGESISRLFEFAGYDVLRLNHVGDWGTQF	X;X;X;X;X;X;X;X;X;X;X;X;X;X;X;B2;X;X;X;X;X;X;X;X;X;X;X;X;X;X;X	XXXXXXXXXPPPPPPPPPPPXXXXXXXXXXX	LFEFAGY(0.998)D(0.002)VLR	LFE(-39.76)FAGY(26.84)D(-26.84)VLR(-43.56)	7	2	-3.5573			By MS/MS	53215000	53215000	0	0	0.2787	0	0	53215000	0	0	1.0474
A0A024R994;O75131	392;392	A0A024R994	A0A024R994	Copine-3	CPNE3		0.999091	31.2986	6.17452e-07	96.673	71.881	96.673	0.877273	9.3365	4.3048e-05	94.09	0.999091	31.2986	6.17452e-07	96.673	0.856363	8.62807	2.55544e-06	75.764		1	Y	GIVEAYRSCLPQIKLYGPTNFSPIINHVARF	X;X;X;X;X;X;X;X;X;X;X;X;X;X;X;B2;X;X;X;X;X;X;X;X;X;X;X;X;X;X;X	XXXXXXXXXXXXXXPPPPPPPPPPPPPPPPX	LY(0.999)GPT(0.001)NFSPIINHVAR	LY(31.3)GPT(-31.3)N(-37.79)FS(-56.4)PIIN(-88.96)H(-94.68)VAR(-96.63)	2	3	-0.055115	By matching	By MS/MS	By MS/MS	148820000	148820000	0	0	NaN	42770000	39149000	49678000	NaN	NaN	NaN
R4GMR5;V9HW09;P48556;K7EJR3;Q5U0B3;B4E2Y4;K7EJC1	172;235;235;172;142;113;68	R4GMR5	R4GMR5	26S proteasome non-ATPase regulatory subunit 8	PSMD8;HEL-S-91n		0.969186	15.2854	6.33569e-07	96.414	85.626	96.414	0.935824	13.8389	2.20987e-05	62.055	0.955089	16.2958	5.51287e-05	60.209	0.969186	15.2854	6.33569e-07	96.414		1	Y	IQTNVYIKHPVSLEQYLMEGSYNKVFLAKGN	X;X;X;X;X;X;X;X;X;X;X;X;X;X;X;B2;X;X;X;X;X;X;X;X;X;X;X;X;X;X;X	XXXXXXXXPPPPPPPPPPPPPPPPXXXXXXX	HPVSLE(0.001)Q(0.029)Y(0.969)LM(0.001)EGSYNK	H(-42.64)PVS(-41.91)LE(-28.57)Q(-15.29)Y(15.29)LM(-32.04)E(-43.38)GS(-58.76)Y(-64.5)N(-75.32)K(-74.96)	8	3	-0.17301	By MS/MS	By MS/MS	By MS/MS	327490000	327490000	0	0	30.587	99551000	121880000	106050000	9.2979	NaN	NaN
V9HWB8;P14618;A0A024R5Z9;B4DNK4;B4DRT3;H3BTN5;A0A024R609;H3BQ34	175;175;175;101;155;175;175;175	V9HWB8	V9HWB8	Pyruvate kinase;Pyruvate kinase PKM	HEL-S-30;PKM;PKM2		0.999559	34.0449	6.45707e-07	106.4	85.529	69.345	0.98347	18.4924	0.000211265	77.192	0.996906	25.8314	6.45707e-07	106.4	0.999559	34.0449	5.33115e-05	94.616		1	Y	DYKNICKVVEVGSKIYVDDGLISLQVKQKGA	X;X;B2;X;X;X;X;X;X;X;X;X;X;X;X;B2;X;X;X;X;X;X;X;X;X;X;X;X;X;X;X	XXXXXXXXXXXXXXPPPPPPPPPPPPPXXXX	IY(1)VDDGLISLQVK	IY(34.04)VD(-34.04)D(-43.37)GLIS(-59.57)LQ(-67.13)VK(-69.34)	2	3	-0.57935	By matching	By MS/MS	By MS/MS	2379400000	2379400000	0	0	5.6977	795730000	436040000	362110000	5.1896	2.868	3.2259
V9HWC7;P30041	89;89	V9HWC7	V9HWC7	Peroxiredoxin-6	HEL-S-128m;PRDX6		0.820364	7.18037	6.45707e-07	106.4	100.43	84.365	0.720621	5.33634	6.45707e-07	106.4	0.820364	7.18037	0.000141074	84.365	0.789726	6.4306	0.000135888	80.312		1	Y	DSVEDHLAWSKDINAYNCEEPTEKLPFPIID	X;X;X;X;X;X;X;X;X;X;X;X;X;X;X;B2;X;X;X;X;X;X;X;X;X;X;X;X;X;X;X	XXXXXXXXXXXPPPPPPPPPPPPPXXXXXXX	D(0.003)IN(0.157)AY(0.82)N(0.019)C(0.001)EEPTEK	D(-24.21)IN(-7.18)AY(7.18)N(-16.37)C(-31.79)E(-46.06)E(-57.36)PT(-71.04)E(-71.49)K(-71.23)	5	3	-0.92082	By MS/MS	By MS/MS	By MS/MS	1759100000	1759100000	0	0	3.277	301520000	308680000	362870000	2.7778	1.2733	1.9527
Q9BSQ6;Q5QTS3;Q53H34;A0A384ME37;M0QYS1;P40429;Q8J015;Q6NVV1	147;149;149;149;156;149;88;63	Q9BSQ6	Q9BSQ6	60S ribosomal protein L13a;Putative 60S ribosomal protein L13a protein RPL13AP3	RPL13A;RPL13a;RPL13AP3		0.77368	5.3384	6.70329e-07	110.53	88.987	110.53	0.739563	4.53275	6.61125e-05	92.428	0.77368	5.3384	6.70329e-07	110.53	0.499999	0	0.000215161	77.674		1	Y	KFAYLGRLAHEVGWKYQAVTATLEEKRKEKA	B2;X;X;X;X;X;X;X;X;X;X;X;X;X;X;B2;X;X;X;X;X;X;X;X;X;X;X;X;X;X;X	XXXXXXXXXXXXXXXPPPPPPPPPPPXXXXX	Y(0.774)Q(0.226)AVTATLEEK	Y(5.34)Q(-5.34)AVT(-73.47)AT(-92.31)LE(-100.75)E(-108.73)K(-110.53)	1	2	0.81181	By MS/MS	By MS/MS	By MS/MS	749470000	749470000	0	0	5.1237	75258000	60103000	83886000	2.1229	1.1474	1.4354
P54578;A6NJA2;B2RD79;D3DUG9;B3KTG4	151;105;151;125;116	P54578	P54578	Ubiquitin carboxyl-terminal hydrolase 14;Ubiquitin carboxyl-terminal hydrolase	USP14		0.943107	12.3075	6.80514e-07	95.659	77.839	95.659	0.697206	5.03588	3.77696e-06	69.878	0.943107	12.3075	6.80514e-07	95.659	0.678668	4.78522	0.000116254	56.793		1	Y	YAGALRASGEMASAQYITAALRDLFDSMDKT	X;X;X;X;X;X;X;X;X;X;X;X;X;X;X;B2;X;X;X;X;X;X;X;X;X;X;X;X;X;X;X	XXXXXXPPPPPPPPPPPPPPPPXXXXXXXXX	ASGEMAS(0.001)AQ(0.055)Y(0.943)IT(0.001)AALR	AS(-61.71)GE(-59.06)M(-51.75)AS(-31.16)AQ(-12.31)Y(12.31)IT(-31.16)AALR(-57.77)	10	3	-0.21208	By MS/MS	By MS/MS	By MS/MS	141210000	141210000	0	0	NaN	25707000	34433000	27692000	NaN	NaN	NaN
A6NLH6;Q53HE6;Q9P003	85;85;85	A6NLH6	A6NLH6	Protein cornichon homolog 4	CNIH4		0.974306	15.8431	7.01928e-07	85.937	75.978	85.937	0.75796	5.09204	1.09798e-05	82.482	0.960967	14.0822	1.83151e-05	80.859	0.974306	15.8431	7.01928e-07	85.937		1	Y	IFLLNLPVATWNIYRYIMVPSGNMGVFDPTE	X;X;X;X;X;X;X;X;X;X;X;X;X;X;X;B2;X;X;X;X;X;X;X;X;X;X;X;X;X;X;X	XXXXXXXXXXXXXXXPPPPPPPPPPPPPPPP	Y(0.974)IM(0.025)VPSGNMGVFDPTEIHNR	Y(15.84)IM(-15.84)VPS(-36.17)GN(-41.7)M(-47.06)GVFD(-71.05)PT(-81.06)E(-82.97)IH(-85.35)N(-85.33)R(-85.94)	1	3	-0.24175	By MS/MS	By MS/MS	By MS/MS	129810000	129810000	0	0	NaN	40029000	31701000	58082000	NaN	NaN	NaN
Q5T179;Q5T178;P61024	7;7;7	Q5T179	Q5T179	Cyclin-dependent kinases regulatory subunit;Cyclin-dependent kinases regulatory subunit 1	CKS1B		0.971848	18.6457	7.44229e-07	96.993	84.115	49.65	0.971848	18.6457	0.000243606	57.019	0.318399	0	8.9617e-05	58.079	0.427894	0	7.44229e-07	96.993		1	Y	_________MSHKQIYYSDKYDDEEFEYRHV	X;X;X;X;X;X;X;X;X;X;X;X;X;X;X;B2;B2;X;X;X;X;X;X;X;X;X;X;X;X;X;X	XXXXXXXXXXXXXPPPPPPPPPPPPPPPPXX	Q(0.013)IY(0.972)Y(0.013)S(0.001)DK	Q(-18.65)IY(18.65)Y(-18.65)S(-29.73)D(-33.6)K(-38.28)	3	2	0.084175	By MS/MS	By matching	By matching	213370000	213370000	0	0	0.87926	105790000	63543000	44045000	1.492	0.73854	0.51375
Q86SZ7;Q2TNB3;A0A087X1Z3;Q9UL46;H0YM70;Q6FHK9	217;217;232;217;206;217	Q86SZ7	Q86SZ7	Proteasome activator complex subunit 2	PSME2		0.869224	9.7373	7.49342e-07	99.506	61.149	65.483	0.621506	2.2919	7.49342e-07	99.506	0.763449	6.56003	3.21809e-06	71.08	0.869224	9.7373	5.82114e-06	65.483		1	Y	LRAMVLDLRAFYAELYHIISSNLEKIVNPKG	X;X;X;X;X;X;X;X;X;X;X;X;X;X;X;B2;X;X;X;X;X;X;X;X;X;X;X;X;X;X;X	XXXXXXXXXPPPPPPPPPPPPPPPPXXXXXX	AFY(0.007)AE(0.092)LY(0.869)H(0.031)IISSNLEK	AFY(-21.03)AE(-9.74)LY(9.74)H(-14.42)IIS(-39.12)S(-43.05)N(-46.21)LE(-55.02)K(-54.82)	7	3	-0.45077	By MS/MS	By MS/MS	By MS/MS	4028900000	4028900000	0	0	2.5733	0	1669600000	2018700000	0	3.086	3.6594
Q7L2H7;J3KNJ2;E9PN86	139;76;76	Q7L2H7	Q7L2H7	Eukaryotic translation initiation factor 3 subunit M	EIF3M		0.793429	5.96923	7.66887e-07	86.288	59.318	86.288	0.453621	0	0.00230965	49.627	0.793429	5.96923	7.66887e-07	86.288	0.471399	0	0.000363817	55.437		1	Y	YCSLIKVAASCGAIQYIPTELDQVRKWISDW	X;X;X;X;X;X;X;X;X;X;X;X;X;X;X;B2;X;X;X;X;X;X;X;X;X;X;X;X;X;X;X	XXXXXXPPPPPPPPPPPPPPPPPPPXXXXXX	VAAS(0.003)C(0.002)GAIQ(0.201)Y(0.793)IPTELDQVR	VAAS(-24.2)C(-25.18)GAIQ(-5.97)Y(5.97)IPT(-33.79)E(-39.25)LD(-56.48)Q(-61.94)VR(-66.45)	10	2	-2.1945		By MS/MS		125740000	125740000	0	0	NaN	0	125740000	0	NaN	NaN	NaN
Q9Y2X3;B3KN82;H7BZ72	274;211;144	Q9Y2X3	Q9Y2X3	Nucleolar protein 58	NOP58		0.993756	22.3935	7.80966e-07	115.86	84.101	115.86	0.755113	6.47898	0.000733891	70.747	0.993756	22.3935	7.80966e-07	115.86	0.865625	10.073	0.000464634	75.378		1	Y	TQVIEISEYRTQLYEYLQNRMMAIAPNVTVM	X;X;X;X;X;X;X;X;X;X;X;X;X;X;X;B2;X;X;X;X;X;X;X;X;X;X;X;X;X;X;X	XXXXXXXXXXPPPPPPPPPPXXXXXXXXXXX	TQLYE(0.006)Y(0.994)LQNR	T(-87.64)Q(-87.64)LY(-50.7)E(-22.39)Y(22.39)LQ(-33.57)N(-41.88)R(-51.15)	6	2	-1.2354	By MS/MS	By MS/MS	By MS/MS	74284000	74284000	0	0	NaN	22001000	28602000	23681000	NaN	NaN	NaN
A0A024QZ30;P31040;D6RFM5;Q0QF12;B3KT34;B4DYN5;A0A494C1T6	259;259;259;194;34;259;259	A0A024QZ30	A0A024QZ30	Succinate dehydrogenase [ubiquinone] flavoprotein subunit, mitochondrial	SDHA		0.753977	4.88659	8.37942e-07	108.43	67.269	108.43	0	0		NaN	0.753977	4.88659	8.37942e-07	108.43	0.711004	3.91438	9.51299e-05	100.25		1	Y	IHRIRAKNTVVATGGYGRTYFSCTSAHTSTG	X;X;X;X;X;X;X;X;X;X;X;X;X;X;X;B2;X;X;X;X;X;X;X;X;X;X;X;X;X;X;X	XXXXXXXPPPPPPPPPPPXXXXXXXXXXXXX	NTVVAT(0.001)GGY(0.754)GR(0.245)	N(-107.15)T(-107.15)VVAT(-27.68)GGY(4.89)GR(-4.89)	9	2	-0.62211	By matching	By MS/MS	By MS/MS	32716000	32716000	0	0	1.5144	18593000	14123000	0	3.0054	2.5134	0
A8K8D9;A0A384NL00;P11413;Q2VF42;B4DYA7;A0A4P8W0G4;Q2Q9H2;Q2Q9B7	424;424;424;384;424;335;384;384	A8K8D9;Q2Q9H2	A8K8D9	Glucose-6-phosphate 1-dehydrogenase	G6PD		0.657234	6.16978	8.39921e-07	71.592	62.884	71.592	0	0		NaN	0.581746	5.43408	9.61462e-05	57.045	0.657234	6.16978	8.39921e-07	71.592		1	Y	PGMFFNPEESELDLTYGNRYKNVKLPDAYER	X;X;X;X;X;X;X;X;X;X;X;X;X;X;X;B2;X;X;X;X;X;X;X;X;X;X;X;X;B2;X;X	PPPPPPPPPPPPPPPPPPPXXXXXXXXXXXX	KPGMFFNPEESELDLT(0.025)Y(0.657)GN(0.159)R(0.159)	K(-68.54)PGM(-68.63)FFN(-63.79)PE(-55.62)E(-55.62)S(-55.62)E(-50.85)LD(-32.21)LT(-14.23)Y(6.17)GN(-6.17)R(-6.17)	17	3	-1.7487	By matching	By MS/MS	By matching	562100000	562100000	0	0	8.5084	136450000	203960000	221700000	NaN	7.2577	5.8399
B4DVD7;Q9UBQ5;K7ES31;K7ERF1	21;21;21;21	B4DVD7	B4DVD7	Eukaryotic translation initiation factor 3 subunit K	EIF3K		0.992846	21.4234	9.39997e-07	107.15	86.169	107.15	0.962636	14.1105	0.000283278	80.706	0.992846	21.4234	9.39997e-07	107.15	0.986627	18.6794	1.9516e-05	96.342		1	Y	QMRANVGKLLKGIDRYNPENLATLERYVEMQ	X;X;X;X;X;X;X;X;X;X;X;X;X;X;X;B2;X;X;X;X;X;X;X;X;X;X;X;X;X;X;X	XXXXXXXXXXXXXXXPPPPPPPPPPPXXXXX	Y(0.993)N(0.007)PENLATLER	Y(21.42)N(-21.42)PE(-71.64)N(-82.3)LAT(-103.14)LE(-102.86)R(-106.81)	1	2	-0.16039	By MS/MS	By MS/MS	By MS/MS	115350000	115350000	0	0	7.7828	25943000	31200000	35451000	NaN	NaN	2.3919
Q5JR94;P62241;Q5JR95	83;83;63	Q5JR94	Q5JR94	40S ribosomal protein S8	RPS8		0.983647	18.0967	9.66598e-07	103.91	83.008	103.91	0.983647	18.0967	9.66598e-07	103.91	0.956893	15.3171	3.17993e-06	97.734	0.912763	12.8372	0.000151213	56.527		1	Y	GSECCTRKTRIIDVVYNASNNELVRTKTLVK	X;X;X;X;X;X;X;X;X;X;X;X;X;X;X;B2;X;X;X;X;X;X;X;X;X;X;X;X;X;X;X	XXXXXXXXXXPPPPPPPPPPPPPPPXXXXXX	IIDVVY(0.984)N(0.015)ASNNELVR	IID(-32.97)VVY(18.1)N(-18.1)AS(-32.97)N(-40.29)N(-47.5)E(-54.61)LVR(-77.12)	6	2	0.23633	By MS/MS	By MS/MS	By MS/MS	703610000	703610000	0	0	2.6507	66673000	97370000	102920000	1.1861	0.8376	1.1069
O95817;Q53GY1;C9JFK9	205;205;147	O95817	O95817	BAG family molecular chaperone regulator 3	BAG3		0.994031	22.2153	9.7278e-07	90.966	62.953	90.966	0.991392	20.6138	9.7278e-07	79.337	0.994031	22.2153	8.72341e-06	90.966	0.968103	14.8244	0.000101734	58.83		1	Y	SSGRSSLGSHQLPRGYISIPVIHEQNVTRPA	X;X;X;X;X;X;X;X;X;X;X;X;X;X;X;B2;X;X;X;X;X;X;X;X;X;X;X;X;X;X;X	XXXXXXXXXXXXXXPPPPPPPPPPPPPPPXX	GY(0.994)IS(0.006)IPVIHEQNVTR	GY(22.22)IS(-22.22)IPVIH(-81.18)E(-86.92)Q(-89.6)N(-90.6)VT(-90.56)R(-90.97)	2	3	-1.1044	By MS/MS	By MS/MS	By MS/MS	99891000	99891000	0	0	NaN	0	32049000	67843000	NaN	NaN	NaN
B7Z997;O94875	442;1050	B7Z997;O94875	O94875	Sorbin and SH3 domain-containing protein 2	SORBS2		0.821376	10.6668	1.07406e-06	49.069	35.997	47.044	0.821376	10.6668	1.81686e-06	47.044					0.643809	7.58627	1.07406e-06	49.069		1	Y	THENIQGGGEPFQALYNYTPRNEDELELRES	X;X;X;X;X;X;X;X;X;X;X;X;X;X;X;B2;X;X;X;X;X;X;X;X;X;X;X;X;X;X;X	PPPPPPPPPPPPPPPPPPPPPXXXXXXXXXX	IHSLSSNKPQRPVFTHE(0.001)N(0.001)IQ(0.011)GGGE(0.031)PFQ(0.027)ALY(0.821)N(0.07)Y(0.024)T(0.009)PR(0.004)	IH(-42.92)S(-40.57)LS(-37.81)S(-37.81)N(-37.81)K(-37.81)PQ(-37.81)R(-34.75)PVFT(-35.04)H(-35.04)E(-31.69)N(-31.69)IQ(-18.82)GGGE(-14.25)PFQ(-14.81)ALY(10.67)N(-10.67)Y(-15.36)T(-19.82)PR(-22.86)	30	5	-0.70508	By MS/MS		By MS/MS	131350000	131350000	0	0	NaN	52098000	0	79255000	NaN	NaN	NaN
O75340;A0A024QZ42;Q53FC3	91;21;91	O75340	O75340	Programmed cell death protein 6	PDCD6		0.998854	29.4836	1.09602e-06	111.46	91.797	111.46	0	0		NaN	0.992546	21.5983	2.41055e-06	109.21	0.998854	29.4836	1.09602e-06	111.46		1	Y	NKAGVNFSEFTGVWKYITDWQNVFRTYDRDN	X;X;X;X;X;X;X;X;X;X;X;X;X;X;X;B2;X;X;X;X;X;X;X;X;X;X;X;X;X;X;X	XXXXXXXXXXXXXXXPPPPPPPPPPXXXXXX	Y(0.999)IT(0.001)DWQNVFR	Y(29.48)IT(-29.48)D(-46.74)W(-64.99)Q(-81.71)N(-95.83)VFR(-111.46)	1	3	-1.6418	By matching	By MS/MS	By MS/MS	332000000	332000000	0	0	1.0291	69592000	72346000	118430000	0.73068	0.635	1.0439
Q59EY4;B4DUD6;Q8TC62;E7ES33;Q3LIE9;A4GYY8;A8K3D0;E7EPK1;Q16181;Q3B7A3;A0A5F9ZGZ7;A0A0U1RRD1	16;11;10;10;11;26;29;30;30;29;30;30	Q59EY4	Q59EY4	Septin-7	SEPT7;Nbla02942;DKFZp686F17268		0.767459	5.246	1.1072e-06	87.824	70.756	87.824					0.767459	5.246	1.1072e-06	87.824	0.737122	4.71237	1.61407e-06	73.758		1	Y	VNSSTMVAQQKNLEGYVGFANLPNQVYRKSV	X;X;X;X;X;X;X;X;X;X;X;X;X;X;X;B2;X;X;X;X;X;X;X;X;X;X;X;X;X;X;X	XXXXXXXXXXXPPPPPPPPPPPPPPPPPXXX	N(0.003)LE(0.229)GY(0.767)VGFANLPNQVYR	N(-23.78)LE(-5.25)GY(5.25)VGFAN(-54.14)LPN(-71.75)Q(-75.73)VY(-72.9)R(-72.67)	5	3	0.65116		By MS/MS	By MS/MS	85152000	85152000	0	0	NaN	0	24312000	60840000	NaN	NaN	NaN
Q02790;B2R9U2	202;202	Q02790	Q02790	Peptidyl-prolyl cis-trans isomerase FKBP4;Peptidyl-prolyl cis-trans isomerase FKBP4, N-terminally processed	FKBP4		0.894699	10.4074	1.1198e-06	91.62	76.075	51.495	0.894699	10.4074	2.50514e-06	84.365	0.789458	8.37589	8.77995e-06	68.44	0.789696	6.72984	1.1198e-06	91.62		1	Y	ELRFEIGEGENLDLPYGLERAIQRMEKGEHS	X;X;X;X;X;X;X;X;X;X;X;X;X;X;X;B2;X;X;X;X;X;X;X;X;X;X;X;X;X;X;X	XXXPPPPPPPPPPPPPPPPPXXXXXXXXXXX	FEIGEGENLD(0.003)LPY(0.895)GLE(0.081)R(0.02)	FE(-44.65)IGE(-37.55)GE(-37.55)N(-33.6)LD(-24.22)LPY(10.41)GLE(-10.41)R(-16.57)	13	3	-0.18936	By MS/MS	By MS/MS	By MS/MS	1376800000	1376800000	0	0	0.4174	199330000	224610000	285340000	0.30225	0.14901	0.25214
K7ELW9;A0A024R7G4;Q9NVP2	111;111;111	K7ELW9	K7ELW9	Histone chaperone ASF1B	ASF1B		0.499962	0	1.17006e-06	103.34	85.974	103.34	0.499647	0	1.56906e-05	82.651	0.499962	0	1.17006e-06	103.34	0.499405	0	1.84408e-05	89.403		1	Y	LITCTYHGQEFIRVGYYVNNEYLNPELRENP	X;X;X;X;X;X;X;X;X;X;X;X;X;X;X;B2;X;X;X;X;X;X;X;X;X;X;X;X;X;X;X	XXXXXXXXXXXXXPPPPPPPPPPPPPPPXXX	VGY(0.5)Y(0.5)VNNEYLNPELR	VGY(0)Y(0)VN(-38.9)N(-46.98)E(-54.9)Y(-62.63)LN(-85.07)PE(-96.9)LR(-102.73)	3	2	-0.58209	By matching	By MS/MS		120460000	120460000	0	0	NaN	41456000	79003000	0	NaN	NaN	NaN
K7ELW9;A0A024R7G4;Q9NVP2	112;112;112	K7ELW9	K7ELW9	Histone chaperone ASF1B	ASF1B		0.499962	0	1.17006e-06	103.34	85.974	103.34	0.499647	0	1.56906e-05	82.651	0.499962	0	1.17006e-06	103.34	0.499405	0	1.84408e-05	89.403		1	Y	ITCTYHGQEFIRVGYYVNNEYLNPELRENPP	X;X;X;X;X;X;X;X;X;X;X;X;X;X;X;X;X;X;X;X;X;X;X;X;X;X;X;X;X;X;X	XXXXXXXXXXXXXXXXXXXXXXXXXXXXXXX	VGY(0.5)Y(0.5)VNNEYLNPELR	VGY(0)Y(0)VN(-38.9)N(-46.98)E(-54.9)Y(-62.63)LN(-85.07)PE(-96.9)LR(-102.73)	4	2	-0.58209	By matching	By MS/MS		120460000	120460000	0	0	NaN	41456000	79003000	0	NaN	NaN	NaN
Q5JP53;A0A384NYT8;Q5SU16;P07437;B7ZAF0;B4DY90;Q5ST81;Q6LC01;Q9BUU9;B4E052;B7ZAK1;B4DMU8;Q96B85;Q1KSF8;B4DXZ5;A4UCT2;P04350;B4DE77;B4DJ43;Q8IZ29;P68371;Q8IWP6;Q8N6N5;B3KML9;Q96HX0;B4DFH6	292;309;310;310;281;330;238;303;206;219;238;183;132;164;137;19;310;275;228;310;310;310;310;262;92;102	Q5JP53;P04350;Q8IZ29	Q8IZ29	Tubulin beta chain;Tubulin beta-4A chain;Tubulin beta-4B chain	TUBB;XTP3TPATP1;TUBB4A;TUBB2C;TUBB4B		0.999717	35.4882	1.21512e-06	121.31	82.477	117.04	0.999523	33.2139	2.69839e-06	121.31	0.999717	35.4882	1.21512e-06	117.1	0.999396	32.1899	3.18431e-05	121.31		1	Y	DAKNMMAACDPRHGRYLTVAAVFRGRMSMKE	X;X;X;X;X;X;X;X;X;X;X;X;X;X;X;B2;X;X;X;X;X;X;X;X;X;X;X;X;X;X;X	XXXXXXXXXXXXXXXPPPPPPPPPXXXXXXX	Y(1)LTVAAVFR	Y(35.49)LT(-35.49)VAAVFR(-117.04)	1	3	-2.2999	By MS/MS	By MS/MS	By MS/MS	3718400000	3718400000	0	0	0.58378	69226000	84405000	71595000	0.048388	0.034839	0.028454
B3KNG6;A0A024R755;Q6IAW5;O43852;B3KQF5	47;47;47;47;47	B3KNG6;Q6IAW5	Q6IAW5	Calumenin	CALU		0.589163	5.57558	1.21998e-06	85.518	80.089	85.518	0	0		NaN	0.589163	5.57558	1.21998e-06	85.518	0.345281	0	6.43166e-05	74.364		1	Y	PQLSDKVHNDAQSFDYDHDAFLGAEEAKTFD	X;X;X;X;X;X;X;X;X;X;X;X;X;X;X;B2;X;X;X;X;X;X;X;X;X;X;X;X;X;X;X	XXXXXXPPPPPPPPPPPPPPPPPPPPPPXXX	VHNDAQ(0.004)S(0.02)FD(0.163)Y(0.589)D(0.163)H(0.046)D(0.013)AFLGAEEAK	VH(-47.26)N(-38.95)D(-33.43)AQ(-21.22)S(-14.6)FD(-5.58)Y(5.58)D(-5.58)H(-11.07)D(-16.49)AFLGAE(-52.35)E(-61.63)AK(-68.65)	10	4	0.21897		By MS/MS		340430000	340430000	0	0	0.18619	0	340430000	0	0	0.42519	0
Q9NPA3	149	Q9NPA3	Q9NPA3	Mid1-interacting protein 1	MID1IP1		0.643646	6.78211	1.26398e-06	66.886	51.294	66.886	0.643646	6.78211	1.26398e-06	66.886										1	Y	EGADAGEEDLEQQFHYHLRGLHTVLSKLTRK	X;X;X;X;X;X;X;X;X;X;X;X;X;X;X;B2;X;X;X;X;X;X;X;X;X;X;X;X;X;X;X	PPPPPPPPPPPPPPPPPPPXXXXXXXXXXXX	DILVDLGHLEGADAGEEDLE(0.001)Q(0.001)Q(0.005)FH(0.102)Y(0.644)H(0.112)LR(0.135)	D(-64.96)ILVD(-56.28)LGH(-56.37)LE(-54.96)GAD(-45.42)AGE(-44.19)E(-40.12)D(-34.45)LE(-26.68)Q(-26.68)Q(-21.4)FH(-8.01)Y(6.78)H(-7.6)LR(-6.78)	25	4	-0.18137	By MS/MS			68123000	68123000	0	0	NaN	68123000	0	0	NaN	NaN	NaN
B4DLR3;Q00839;B3KX72;Q96BA7;A0A1W2PP35;A0A1X7SBS1;Q5RI18;A0A1W2PPL4;A0A1W2PPH7;Q7Z4Q5;A0A1W2PQD4;A0A087WVI9	784;825;750;722;728;744;602;547;549;513;327;17	B4DLR3	B4DLR3	Heterogeneous nuclear ribonucleoprotein U	HNRNPU;HNRPU		0.952712	13.2606	1.26569e-06	106.42	99.57	73.951	0.952712	13.2606	1.26569e-06	106.42	0.731763	4.41269	0.00139683	51.567	0.776118	6.3579	2.85573e-05	57.859		1	Y	FWGQKPWSQHYHQGYY_______________	X;X;X;X;X;X;X;X;X;X;X;X;X;X;X;B2;X;X;X;X;X;X;X;X;X;X;X;X;X;X;X	PPPPPPPPPPPPPPPPXXXXXXXXXXXXXXX	PWSQHYHQ(0.002)GY(0.045)Y(0.953)	PW(-68.54)S(-65.22)Q(-60.44)H(-56.12)Y(-50.2)H(-33.22)Q(-27.11)GY(-13.26)Y(13.26)	11	3	-0.65725	By MS/MS	By MS/MS	By MS/MS	951060000	951060000	0	0	1.2947	198020000	256810000	0	0.72416	0.79069	0
A0A024RDF4;A1LU37;Q14103;H0Y8G5;H0YA96;Q12771;B4DTC3;A0A024RDB4;D6RAF8;B4E0W4	201;201;201;134;105;180;149;182;201;47	A0A024RDF4	A0A024RDF4	Heterogeneous nuclear ribonucleoprotein D0	HNRPD;HNRNPD		0.499983	0	1.42217e-06	95.498	79.869	78	0	0		NaN	0.499983	0	1.42217e-06	95.498						1	Y	VGGLSPDTPEEKIREYFGGFGEVESIELPMD	X;X;X;X;X;X;X;X;X;X;X;B2;X;X;X;X;X;X;X;X;X;X;X;X;X;X;X;X;X;X;X	XXXXXXXXXXXXXXXXXXXXXXXXXXXXXXX	E(0.5)Y(0.5)FGGFGEVESIELPMDNK	E(0)Y(0)FGGFGE(-42.22)VE(-53.77)S(-56.72)IE(-65.52)LPM(-73.81)D(-76.61)N(-78)K(-78)	2	3	-1.5928	By matching	By MS/MS		315690000	315690000	0	0	0.05834	69202000	149870000	0	0.095669	0.053652	0
B4DZX0;Q53GX6;A8K7Q1;Q02818;H7BZI1;C9JKZ2	170;190;190;190;160;190	B4DZX0	B4DZX0	Nucleobindin-1	NUCB1		0.999822	37.5194	1.43935e-06	113.18	85.002	111.82	0.999132	30.6159	2.51032e-06	108.81	0.999822	37.5194	1.77164e-06	111.82	0.999675	35.0267	1.43935e-06	113.18		1	Y	EFKRYEMLKEHERRRYLESLGEEQRKEAERK	X;X;X;X;X;X;X;X;X;X;X;X;X;X;X;B2;X;X;X;X;X;X;X;X;X;X;X;X;X;X;X	XXXXXXXXXXXXXXXPPPPPPPPPPXXXXXX	Y(1)LESLGEEQR	Y(37.52)LE(-37.52)S(-62.4)LGE(-87.87)E(-100.6)Q(-108.25)R(-111.82)	1	2	0.27142	By MS/MS	By MS/MS	By MS/MS	275990000	275990000	0	0	9.7682	67552000	80676000	127760000	8.9711	8.1723	11.773
A0A024R8E4;Q9BV86;S4R338	215;215;127	A0A024R8E4	A0A024R8E4	N-terminal Xaa-Pro-Lys N-methyltransferase 1;N-terminal Xaa-Pro-Lys N-methyltransferase 1, N-terminally processed	C9orf32;NTMT1		0.546513	1.80212	1.55626e-06	90.348	76.318	76.82	0.546513	1.80212	1.55626e-06	76.82	0.330054	0	6.31584e-05	90.348						1	Y	SLLAEERQENLPDEIYHVYSFALR_______	X;X;X;X;X;X;X;X;X;X;X;X;X;X;X;B2;X;X;X;X;X;X;X;X;X;X;X;X;X;X;X	XXXXXXXPPPPPPPPPPPPPPPPPXXXXXXX	QEN(0.009)LPD(0.361)E(0.08)IY(0.547)H(0.003)VYSFALR	Q(-34.44)E(-34.44)N(-17.84)LPD(-1.8)E(-8.34)IY(1.8)H(-22.54)VY(-41.35)S(-46.75)FALR(-56.77)	9	3	0.22077	By MS/MS			151000000	151000000	0	0	NaN	151000000	0	0	NaN	NaN	NaN
B4E0S6;O43143	634;645	B4E0S6	B4E0S6	Pre-mRNA-splicing factor ATP-dependent RNA helicase DHX15	DHX15		0.646166	6.53726	1.57561e-06	76.574	73.942	75.018	0.416707	0	2.50338e-06	76.574					0.646166	6.53726	1.57561e-06	75.018		1	Y	VYHAFKQNHESVQWCYDNFINYRSLMSADNV	X;X;X;X;X;X;X;X;X;X;X;X;X;X;X;B2;X;X;X;X;X;X;X;X;X;X;X;X;X;X;X	XXXXXXPPPPPPPPPPPPPPPPPXXXXXXXX	QNHES(0.001)VQ(0.038)W(0.143)C(0.143)Y(0.646)D(0.023)N(0.005)FINYR	Q(-42.2)N(-42.2)H(-42.68)E(-35.87)S(-29.29)VQ(-12.26)W(-6.54)C(-6.54)Y(6.54)D(-14.51)N(-21.45)FIN(-44.57)Y(-50.98)R(-55.66)	10	3	-0.72737			By MS/MS	87405000	87405000	0	0	NaN	0	0	87405000	NaN	NaN	NaN
A0A384NQ35;A0A0K0K1L8;Q06323;Q6FHU3;Q86SZ9;H0YKK6	207;209;209;209;133;50	A0A384NQ35	A0A384NQ35	Proteasome activator complex subunit 1	PSME1		0.894627	9.63315	1.72416e-06	105.98	89.821	105.98	0.800606	9.12679	0.000212009	85.355	0.894627	9.63315	1.72416e-06	105.98	0	0		NaN		1	Y	VGDYRQLVHELDEAEYRDIRLMVMEIRNAYA	X;X;X;X;X;X;X;X;X;X;X;X;X;X;X;B2;X;X;X;X;X;X;X;X;X;X;X;X;X;X;X	XXXXXPPPPPPPPPPPPXXXXXXXXXXXXXX	QLVHELDEAE(0.008)Y(0.895)R(0.097)	Q(-103.82)LVH(-81.94)E(-58.37)LD(-43.51)E(-35.92)AE(-20.62)Y(9.63)R(-9.63)	11	2	-0.028302	By MS/MS	By MS/MS	By matching	55940000	55940000	0	0	0.24428	23638000	19052000	13250000	0.33593	0.27197	0.14958
B0ZBD0;Q8WVX7;P39019;M0R2L9;M0QYF7;M0R140	48;60;48;47;48;48	B0ZBD0	B0ZBD0	40S ribosomal protein S19	RPS19		0.872116	11.2467	1.73589e-06	105.65	80.929	105.65	0.872116	11.2467	1.73589e-06	105.65	0.805558	7.28825	0.000230386	64.82	0	0		NaN		1	Y	WVDTVKLAKHKELAPYDENWFYTRAASTARH	X;X;X;X;X;X;X;X;X;X;X;X;X;X;X;B2;X;X;X;X;X;X;X;X;X;X;X;X;X;X;X	XXXXXXXXXXXPPPPPPPPPPPPPXXXXXXX	E(0.065)LAPY(0.872)D(0.062)ENWFYTR	E(-11.25)LAPY(11.25)D(-11.46)E(-40.09)N(-56.99)W(-64.25)FY(-90.1)T(-89.3)R(-94.39)	5	3	3.4042	By MS/MS	By MS/MS	By matching	309170000	309170000	0	0	NaN	40151000	80217000	16648000	NaN	NaN	NaN
Q7RTQ8;Q7RTQ2;G3V3H3;Q7RTQ0;G3V5R9;Q7RTQ9;Q7RTQ7;G3V2E7;F8W6L3;B4DGB3;Q7RTQ1;Q7RTQ4;Q7RTP8;E7EVH7;Q07866;G5E9S8;B5BU63;B4DS14;Q7Z5D5	360;360;360;356;360;356;356;360;360;360;360;356;356;532;360;358;356;532;360	Q7RTQ8	Q7RTQ8	Kinesin light chain 1	KNS2;KLC1		0.890621	9.43345	1.74055e-06	111.95	81.693	111.95	0.827927	10.3419	0.000344491	78.334	0.890621	9.43345	1.74055e-06	111.95	0.821861	10.1784	0.000822622	69.423		1	Y	LALLCQNQGKYEEVEYYYQRALEIYQTKLGP	X;X;X;X;X;X;X;X;X;X;X;X;X;X;X;B2;X;X;X;X;X;X;X;X;X;X;X;X;X;X;X	XXXXXXXXXXPPPPPPPPPPXXXXXXXXXXX	YEEVE(0.101)Y(0.891)Y(0.007)Y(0.001)QR	Y(-75.55)E(-75.55)E(-46.7)VE(-9.43)Y(9.43)Y(-20.88)Y(-32.04)Q(-42.52)R(-52.15)	6	2	-0.076493	By MS/MS	By MS/MS	By MS/MS	100910000	100910000	0	0	2.0722	31735000	36824000	32347000	2.5684	1.9947	1.8095
C9J0J7;G5E9Q6;B4DNH1;D3DNI2;D3DNI3	85;134;134;328;334	C9J0J7	C9J0J7	Profilin	PFN2		0.990518	20.1894	1.85479e-06	137.18	106.99	111.82	0.98905	19.5581	1.85479e-06	117.16	0.987578	19.0037	6.03307e-06	130.04	0.990518	20.1894	5.74085e-06	137.18		1	Y	VHGGTLNKKAYELALYLRRSDV_________	X;X;X;X;X;X;X;X;X;X;X;X;X;X;X;B2;X;X;X;X;X;X;X;X;X;X;X;X;X;X;X	XXXXXXXXXPPPPPPPPPXXXXXXXXXXXXX	AYELALY(0.991)LR(0.009)	AY(-105.37)E(-85.92)LALY(20.19)LR(-20.19)	7	2	3.332	By MS/MS	By MS/MS	By MS/MS	115280000	115280000	0	0	NaN	0	52896000	35185000	NaN	NaN	NaN
C9JZR2;O60716;Q96FS1;A0A669KB62;A0A669KB05;Q68DU0;Q7KZJ3;A0A024R4Z0;A0A024R4Y7;H0YC95	865;865;756;835;841;865;536;536;536;42	C9JZR2	C9JZR2	Catenin delta-1	CTNND1;DKFZp781O2021		0.58649	5.77424	2.11339e-06	72.583	65.132	72.583					0	0		NaN	0.58649	5.77424	2.11339e-06	72.583		1	Y	QVNLNNASRSQSSHSYDDSTLPLIDRNQKSD	X;X;X;X;X;X;X;X;X;X;X;X;X;X;X;B2;X;X;X;X;X;X;X;X;X;X;X;X;X;X;X	XXXXXXXXXPPPPPPPPPPPPPPPPPXXXXX	S(0.003)Q(0.003)S(0.014)S(0.014)H(0.014)S(0.155)Y(0.586)D(0.155)D(0.042)S(0.012)T(0.003)LPLIDR	S(-23.12)Q(-23.12)S(-16.37)S(-16.37)H(-16.37)S(-5.77)Y(5.77)D(-5.77)D(-11.46)S(-17.04)T(-22.51)LPLID(-65.35)R(-68.06)	7	3	0.42477		By matching	By MS/MS	95499000	95499000	0	0	NaN	0	46514000	48985000	NaN	NaN	NaN
E9PM92;O00193;E9PRZ9	84;84;56	E9PM92	E9PM92	Small acidic protein	C11orf58;SMAP		0.571225	6.13117	2.18741e-06	84.479	79.401	81.448	0.524397	5.39139	3.98505e-06	80.014	0.560156	5.97052	2.18741e-06	73.296	0.571225	6.13117	4.33853e-06	84.479		1	Y	TGEEDKKINEELESQYQQSMDSKLSGRYRRH	X;X;X;X;X;X;X;X;X;X;X;X;X;X;X;B2;X;X;X;X;X;X;X;X;X;X;X;X;X;X;X	XXXXXXXPPPPPPPPPPPPPPPPXXXXXXXX	INE(0.002)E(0.006)LE(0.139)S(0.139)Q(0.139)Y(0.571)Q(0.004)QSMDSK	IN(-39.21)E(-25.79)E(-20)LE(-6.13)S(-6.13)Q(-6.13)Y(6.13)Q(-21.77)Q(-41.26)S(-52.37)M(-56.98)D(-61.09)S(-64.87)K(-68.73)	9	3	-1.2361	By MS/MS	By MS/MS	By MS/MS	450850000	450850000	0	0	2.9324	137900000	142040000	170910000	3.3541	2.3751	3.2352
B4DRA0;B4DLM0;B3KWX7;Q68DD9;B4E1M7;A0A384NQ03;Q14498;B7Z4L7;Q6N037;Q6MZY7;E1P5S2;Q7Z3L0;A0A0U1RQH7;H0Y4X3;G3XAC6;A0A0U1RQW2;A0A0S2Z5I1;Q6IA98;A0A0S2Z5J3;B2RDP1;A0A0S2Z5D9;Q86U06;G3V5Z6;H0YJJ3;G3XAP0;B7Z8M4;B3KWQ8;G3V546	231;226;229;236;244;253;253;96;96;96;96;96;100;126;253;12;232;250;250;250;266;266;16;41;96;96;266;96	B4DRA0	B4DRA0	RNA-binding protein 39;Probable RNA-binding protein 23	DKFZp781C0423;RBM39;DKFZp686A11192;DKFZp686C17209;RNPC2;DKFZp781I1140;RNPC4;RBM23		0.948921	12.7303	2.43369e-06	75.376	56.78	75.376									0.948921	12.7303	2.43369e-06	75.376		1	Y	MANNLQKGSAGPMRLYVGSLHFNITEDMLRG	X;X;X;X;X;X;X;X;X;X;X;X;X;X;X;B2;X;X;X;X;X;X;X;X;X;X;X;X;X;X;X	XXXXXXXXXXXXXXPPPPPPPPPPPPPPPPX	LY(0.949)VGS(0.051)LHFNITEDMLR	LY(12.73)VGS(-12.73)LH(-33.1)FN(-51.33)IT(-65)E(-65.97)D(-71.28)M(-73.51)LR(-74.42)	2	3	1.7386			By MS/MS	159040000	159040000	0	0	NaN	0	0	159040000	NaN	NaN	NaN
A8K3C3;P50991;B7Z9L0;B7Z2Z8;B7Z2F4	269;269;213;213;119	A8K3C3	A8K3C3	T-complex protein 1 subunit delta	CCT4		0.585777	7.18037	2.50514e-06	84.365	75.411	84.365					0.585777	7.18037	2.50514e-06	84.365						1	Y	SAPKTDMDNQIVVSDYAQMDRVLREERAYIL	X;X;X;X;X;X;X;X;X;X;X;X;X;X;X;B2;X;X;X;X;X;X;X;X;X;X;X;X;B2;X;X	XXXXPPPPPPPPPPPPPPPPPXXXXXXXXXX	TDMDNQIVVS(0.022)D(0.112)Y(0.586)AQ(0.112)M(0.06)D(0.096)R(0.012)	T(-77.46)D(-77.46)M(-73.11)D(-68.02)N(-62.31)Q(-49.4)IVVS(-14.28)D(-7.18)Y(7.18)AQ(-7.18)M(-9.9)D(-7.84)R(-16.91)	12	2	-0.68243		By MS/MS		22037000	22037000	0	0	0.51236	0	22037000	0	0	1.4101	0
Q502X2;A0A0S2Z5U7;Q9NR28;A0A024RBT2;A0A0S2Z5P6;K7X1S0;Q53HB7	182;235;235;162;191;138;235	Q502X2	Q502X2	Diablo homolog, mitochondrial	DIABLO		0.968116	15.5406	2.51032e-06	108.81	92.605	108.81	0.968116	15.5406	2.51032e-06	108.81	0	0		NaN	0	0		NaN		1	Y	TQEEGEERAESEQEAYLRED___________	X;X;X;X;X;X;X;X;X;X;X;X;X;X;X;B2;X;X;X;X;X;X;X;X;X;X;X;X;X;X;X	XXXXXXXXPPPPPPPPPPXXXXXXXXXXXXX	AESEQE(0.005)AY(0.968)LR(0.027)	AE(-99.94)S(-82.42)E(-64.46)Q(-37.95)E(-23.14)AY(15.54)LR(-15.54)	8	2	0.37355	By MS/MS	By matching	By matching	141530000	141530000	0	0	NaN	54446000	42875000	44211000	NaN	NaN	NaN
Q15645;H0YAL2	152;148	Q15645	Q15645	Pachytene checkpoint protein 2 homolog	TRIP13		0.972485	15.8926	2.52853e-06	91.355	77.927	91.355	0.972485	15.8926	2.52853e-06	91.355										1	Y	DSLVYDVEVKSHLLDYVMTTLLFSDKNVNSN	X;X;X;X;X;X;X;X;X;X;X;X;X;X;X;B2;X;X;X;X;X;X;X;X;X;X;X;X;X;X;X	XXXXXXXXXXPPPPPPPPPPPPPPPPXXXXX	SHLLD(0.025)Y(0.972)VM(0.002)TTLLFSDK	S(-37.79)H(-37.79)LLD(-15.89)Y(15.89)VM(-27.43)T(-34.84)T(-41.05)LLFS(-69.93)D(-74.21)K(-74.96)	6	3	-0.20794	By MS/MS			191140000	191140000	0	0	0.37287	191140000	0	0	0.96013	0	0
P32929	114	P32929	P32929	Cystathionine gamma-lyase	CTH		0.719069	7.52219	2.60727e-06	78.763	65.626	78.763	0.680641	6.59509	2.60727e-06	78.763	0.627093	7.40585	6.87428e-06	68.034	0.719069	7.52219	2.60727e-06	78.763		1	Y	HLLKAGDQIICMDDVYGGTNRYFRQVASEFG	X;X;X;X;X;X;X;X;X;X;X;X;X;X;X;B2;X;X;X;X;X;X;X;X;X;X;X;X;X;X;X	XXXXPPPPPPPPPPPPPPPPPXXXXXXXXXX	AGDQIICMD(0.002)D(0.011)VY(0.719)GGT(0.127)N(0.127)R(0.013)	AGD(-71.04)Q(-64.8)IIC(-37.08)M(-31.72)D(-26.27)D(-18.13)VY(7.52)GGT(-7.52)N(-7.52)R(-17.39)	12	2	0.62607	By MS/MS	By MS/MS	By MS/MS	167410000	167410000	0	0	4.5392	33959000	35655000	70290000	3.8207	2.4557	5.2167
A0A0S2Z4Z0;Q96PK6;B4DNG4	655;655;199	A0A0S2Z4Z0	A0A0S2Z4Z0	RNA-binding protein 14	RBM14		0.706654	4.28934	2.63403e-06	113.18	99.798	108.3	0.491791	0	9.0002e-06	113.18	0.462584	1.07089	4.51964e-05	90.15	0.706654	4.28934	2.63403e-06	108.3		1	Y	DAHSDYARYSGSYNDYLRAAQMHSGYQRRM_	X;X;X;X;X;B2;X;X;X;X;X;X;X;X;X;B2;X;X;X;X;X;X;X;X;X;X;X;X;X;X;X	XXXXXXXXPPPPPPPPPPXXXXXXXXXXXXX	YSGSYN(0.007)D(0.263)Y(0.707)LR(0.023)	Y(-87.3)S(-87.3)GS(-60.21)Y(-39.46)N(-20.13)D(-4.29)Y(4.29)LR(-14.84)	8	2	-0.12832			By MS/MS	95570000	95570000	0	0	4.5563	0	0	95570000	0	0	NaN
Q8NI22;B4DF17	138;119	Q8NI22	Q8NI22	Multiple coagulation factor deficiency protein 2	MCFD2		0.776228	6.41125	2.71184e-06	72.433	69.536	72.433	0.776228	6.41125	2.71184e-06	72.433										1	Y	GVLRDDDKNNDGYIDYAEFAKSLQ_______	X;X;X;X;X;X;X;X;X;X;X;X;X;X;X;B2;X;X;X;X;X;X;X;X;X;X;X;X;X;X;X	XXXXPPPPPPPPPPPPPPPPPXXXXXXXXXX	DDDKNNDGY(0.003)ID(0.177)Y(0.776)AE(0.042)FAK(0.002)	D(-57.74)D(-57.74)D(-57.96)K(-58.18)N(-58.18)N(-54.06)D(-45.54)GY(-24.79)ID(-6.41)Y(6.41)AE(-12.71)FAK(-25.54)	12	3	-1.2394	By MS/MS			82423000	82423000	0	0	0.24641	82423000	0	0	1.1121	0	0
O95817;C9JFK9	93;35	O95817	O95817	BAG family molecular chaperone regulator 3	BAG3		0.999999	61.1187	2.79946e-06	71.98	56.408	71.98	0.999999	61.1187	2.79946e-06	71.98	0.999985	53.4053	6.47322e-05	59.673	0.999993	56.9541	6.65869e-06	63.682		1	Y	PAREGHPVYPQLRPGYIPIPVLHEGAENRQV	X;X;X;X;X;X;X;X;X;X;X;X;X;X;X;B2;X;X;X;X;X;X;X;X;X;X;X;X;X;X;X	XXXXXXXXXXXXXPPPPPPPPPPPPPPPPXX	PGY(1)IPIPVLHEGAENR	PGY(61.12)IPIPVLH(-61.12)E(-67.88)GAE(-67.76)N(-68.09)R(-68.14)	3	3	-0.90246	By MS/MS	By MS/MS	By MS/MS	66475000	66475000	0	0	NaN	19891000	13212000	20148000	NaN	NaN	NaN
Q6LET6;A0A024RAX2;P10620;F5H760	121;121;121;85	Q6LET6	Q6LET6	Microsomal glutathione S-transferase 1	MGST1		0.994086	23.5529	2.86767e-06	86.738	70.535	86.738	0.994086	23.5529	4.51152e-06	86.738	0.96722	16.2649	4.68435e-06	82.55	0.991111	21.8615	2.86767e-06	76.759		1	Y	HFRLFVGARIYHTIAYLTPLPQPNRALSFFV	X;X;X;X;X;X;X;X;X;X;X;X;X;X;X;B2;X;X;X;X;X;X;X;X;X;X;X;X;X;X;X	XXXXXXXXXPPPPPPPPPPPPPPPPXXXXXX	IYHT(0.001)IAY(0.994)LT(0.004)PLPQPNR	IY(-33.7)H(-38.56)T(-30.14)IAY(23.55)LT(-23.55)PLPQ(-58.46)PN(-69.85)R(-69.49)	7	3	-1.0199	By MS/MS	By MS/MS	By MS/MS	255840000	255840000	0	0	5.2125	56052000	79871000	108180000	3.8347	3.8003	8.0438
B2RNR6;Q96KR1;H0Y8W1	735;735;36	B2RNR6	B2RNR6	Zinc finger RNA-binding protein	ZFR		0.960126	16.1592	3.04503e-06	77.325	67.225	77.325	0.960126	16.1592	3.04503e-06	77.325	0	0		NaN	0	0		NaN		1	Y	DSSDDRYVMTKHATIYPTEEELQAVQKIVSI	X;X;X;X;X;X;X;X;X;X;X;X;X;X;X;B2;X;X;X;X;X;X;X;X;X;X;X;X;X;X;X	XXXXXXXXXXXPPPPPPPPPPPPPPPPXXXX	H(0.005)AT(0.023)IY(0.96)PT(0.01)E(0.001)EELQAVQK	H(-23.09)AT(-16.16)IY(16.16)PT(-19.7)E(-28.26)E(-37.55)E(-45.17)LQ(-61.14)AVQ(-72.84)K(-72.71)	5	3	0.25892	By MS/MS	By matching	By matching	95672000	95672000	0	0	NaN	25074000	37130000	33468000	NaN	NaN	NaN
A0A024R8P8;P63173;J3KT73;J3QL01	41;41;41;41	A0A024R8P8	A0A024R8P8	60S ribosomal protein L38	RPL38		0.99684	25.148	3.19759e-06	105.94	83.607	105.94	0.989135	19.938	0.000165023	82.75	0.994718	23.8207	0.000617379	66.056	0.99684	25.148	3.19759e-06	105.94		1	Y	KKNKDNVKFKVRCSRYLYTLVITDKEKAEKL	X;X;X;X;X;X;X;X;X;X;X;X;X;X;X;B2;X;X;X;X;X;X;X;X;X;X;X;X;X;X;X	XXXXXXXXXXXXXXXPPPPPPPPPPXXXXXX	Y(0.997)LY(0.003)TLVITDK	Y(25.15)LY(-25.15)T(-39.43)LVIT(-98.73)D(-103.1)K(-105.94)	1	2	-1.4584	By MS/MS	By MS/MS	By MS/MS	605750000	605750000	0	0	NaN	196560000	165720000	216720000	NaN	NaN	NaN
A0A140VK94;P43487;C9JJ34;B7Z6U1;B4DE76;F6WQW2;C9JXG8;D3DX26;C9JGV6	103;103;103;90;103;180;53;53;53	A0A140VK94	A0A140VK94	Ran-specific GTPase-activating protein	RANBP1		0.600302	5.74068	3.28056e-06	84.159	72.391	84.159	0.600302	5.74068	3.28056e-06	84.159	0.462629	4.33852	5.70085e-05	71.735	0.549354	5.74068	3.28056e-06	84.159		1	Y	LLMRRDKTLKICANHYITPMMELKPNAGSDR	X;X;X;X;X;X;X;X;X;X;X;X;X;X;X;B2;X;X;X;X;X;X;X;X;X;X;X;X;X;X;X	XXXXXXXXXXPPPPPPPPPPPPPPPPPPPPP	IC(0.036)AN(0.16)H(0.16)Y(0.6)IT(0.044)PMMELKPNAGSDR	IC(-12.27)AN(-5.74)H(-5.74)Y(5.74)IT(-11.36)PM(-46.06)M(-49.9)E(-53.62)LK(-68.57)PN(-79.31)AGS(-80.85)D(-80.85)R(-82.17)	6	4	-0.84648	By MS/MS		By MS/MS	121490000	121490000	0	0	NaN	59126000	0	62367000	NaN	NaN	NaN
A0A024R883;O75348	87;87	A0A024R883	A0A024R883	V-type proton ATPase subunit G 1	ATP6V1G1		0.993197	23.9788	3.45877e-06	164.53	135.38	157.58	0.977456	18.9915	3.45877e-06	150.05	0.993197	23.9788	5.78252e-06	157.58	0.989296	21.4127	4.9151e-06	164.53		1	Y	EVEKETQEKMTILQTYFRQNRDEVLDNLLAF	X;X;X;X;X;X;X;X;X;X;X;X;X;X;X;B2;X;X;X;X;X;X;X;X;X;X;X;X;X;X;X	XXXXXXXXXPPPPPPPPPXXXXXXXXXXXXX	MTILQT(0.004)Y(0.993)FR(0.003)	M(-147.59)T(-147.59)ILQ(-45.76)T(-23.98)Y(23.98)FR(-25.49)	7	2	-0.14287	By MS/MS	By MS/MS	By MS/MS	535110000	535110000	0	0	NaN	125610000	163380000	178210000	NaN	NaN	NaN
P51116	409	P51116	P51116	Fragile X mental retardation syndrome-related protein 2	FXR2		0.89671	10.6312	3.55733e-06	69.188	65.811	66.068	0.77021	6.24773	3.55733e-06	69.188	0	0		NaN	0.89671	10.6312	4.88434e-06	66.068		1	Y	PPGSGRGSGGSDKAGYSTDESSSSSLHATRT	X;X;X;X;X;X;X;X;X;X;X;X;X;X;X;B2;X;X;X;X;X;X;X;X;X;X;X;X;X;X;X	XXXXXXXXXXXXXPPPPPPPPPPPPPPPPPX	AGY(0.897)S(0.078)T(0.02)D(0.005)ESSSSSLHATR	AGY(10.63)S(-10.63)T(-16.53)D(-22.27)E(-34.18)S(-39.23)S(-44.02)S(-48.5)S(-52.64)S(-59.95)LH(-62.43)AT(-64.27)R(-65.58)	3	3	-1.1895	By MS/MS	By matching	By MS/MS	79817000	79817000	0	0	NaN	19799000	32179000	27839000	NaN	NaN	NaN
Q5STK2;O15212	82;82	Q5STK2	Q5STK2	Prefoldin subunit 6	PFDN6		0.978	16.7386	3.56181e-06	105.98	48.385	65.719	0.978	16.7386	3.56181e-06	105.98	0.973051	15.8931	0.00058673	73.885	0.951825	15.9118	5.96551e-06	96.143		1	Y	QELGEARATVGKRLDYITAEIKRYESQLRDL	X;X;X;X;X;X;X;X;X;X;X;X;X;X;X;B2;X;X;X;X;X;X;X;B2;X;X;X;X;X;X;X	XXXXXXXXXXXXPPPPPPPPPPPXXXXXXXX	LD(0.021)Y(0.978)IT(0.001)AEIKR	LD(-16.74)Y(16.74)IT(-29.13)AE(-40.88)IK(-57.83)R(-61.67)	3	3	-0.13982	By MS/MS	By MS/MS	By MS/MS	1148400000	1148400000	0	0	35.403	129630000	130160000	145880000	26.358	8.4927	11.962
A4QPB0;A0A024RC65;P46940;H0YLE8;B4E2M0	1193;1193;1193;621;621	A4QPB0;B4E2M0	A4QPB0	Ras GTPase-activating-like protein IQGAP1	IQGAP1;hCG_1991735		0.989567	22.7805	3.67759e-06	157.86	128.71	148.98	0.757524	7.2006	0.000148884	111.65	0.892013	9.32438	5.87457e-06	157.86	0.989567	22.7805	3.67759e-06	148.98		1	Y	AGEDELLKIIGNLLYYRYMNPAIVAPDAFDI	X;X;X;X;X;X;X;X;X;X;X;X;X;X;X;B2;X;X;X;X;X;X;X;X;X;X;X;X;X;X;X	XXXXXXXXPPPPPPPPPXXXXXXXXXXXXXX	IIGNLLY(0.005)Y(0.99)R(0.005)	IIGN(-106.76)LLY(-22.78)Y(22.78)R(-22.78)	8	2	1.3384	By MS/MS	By MS/MS	By MS/MS	101770000	101770000	0	0	NaN	25999000	37925000	37842000	NaN	NaN	NaN
B2R8Z8;O60506;Q05CK9;Q59GL1;B7Z645	276;276;312;248;178	B2R8Z8	B2R8Z8	Heterogeneous nuclear ribonucleoprotein Q	SYNCRIP		0.89257	9.60514	3.70329e-06	68.845	53.32	60.734	0.771068	5.48836	7.73845e-06	62.803	0.89257	9.60514	4.07616e-05	60.734	0.764599	5.2308	3.70329e-06	68.845		1	Y	EEFSKVTEGLTDVILYHQPDDKKKNRGFCFL	X;X;X;X;X;X;X;X;X;X;X;X;X;X;X;B2;X;X;X;X;X;X;X;X;X;X;X;X;X;X;X	XXXXXPPPPPPPPPPPPPPPPPXXXXXXXXX	VTEGLT(0.003)D(0.003)VILY(0.893)H(0.098)Q(0.004)PDDK	VT(-36.93)E(-36.32)GLT(-25.51)D(-25.51)VILY(9.61)H(-9.61)Q(-23.79)PD(-34.67)D(-37.48)K(-40.79)	11	3	-0.1811	By MS/MS	By MS/MS	By MS/MS	2311800000	2311800000	0	0	0.77852	454510000	615820000	699370000	0.33913	0.63514	1.0601
Q9BWF3;A8K9U0	190;190	Q9BWF3	Q9BWF3	RNA-binding protein 4	RBM4		0.696922	7.24263	3.72504e-06	74.611	54.824	63.128	0.336812	0	3.72504e-06	74.611	0.392525	1.20234	0.000648352	46.926	0.696922	7.24263	6.91644e-06	63.128		1	Y	CPIDRSGRVADLTEQYNEQYGAVRTPYTMSY	X;X;X;X;X;X;X;X;X;X;X;X;X;X;X;B2;X;X;X;X;X;X;X;X;X;X;X;X;X;X;X	XXXXXXXXPPPPPPPPPPPPPPPPXXXXXXX	VAD(0.005)LT(0.026)E(0.026)Q(0.131)Y(0.697)N(0.096)E(0.015)Q(0.002)Y(0.002)GAVR	VAD(-21.75)LT(-14.31)E(-14.31)Q(-7.24)Y(7.24)N(-8.63)E(-16.81)Q(-24.52)Y(-24.52)GAVR(-36.76)	8	3	0.60292			By MS/MS	53866000	53866000	0	0	0.80446	0	0	53866000	0	0	2.1906
Q5U0F4;Q53HU7;Q13347;Q9P1D9	308;308;308;56	Q5U0F4	Q5U0F4	Eukaryotic translation initiation factor 3 subunit I	EIF3I		0.961589	16.6467	3.83376e-06	105.2	98.135	94.309	0.961589	16.6467	5.35047e-05	94.309	0.929132	14.083	0.0020874	67.207	0.837658	7.15125	3.83376e-06	105.2		1	Y	FHPDGKSYSSGGEDGYVRIHYFDPQYFEFEF	X;X;X;X;X;X;X;X;X;X;X;X;X;X;X;B2;X;X;X;X;X;X;X;X;X;X;X;X;X;X;X	XXXXXXPPPPPPPPPPPPXXXXXXXXXXXXX	SYSSGGE(0.003)D(0.015)GY(0.962)VR(0.021)	S(-85.35)Y(-85.35)S(-67.87)S(-45.89)GGE(-25.65)D(-18.08)GY(16.65)VR(-16.65)	10	2	0.84844	By MS/MS	By MS/MS	By MS/MS	223020000	223020000	0	0	NaN	86446000	78338000	58234000	NaN	NaN	NaN
F5H5D3;Q9BQE3;Q53GA7;B7Z1K5;Q8N532;A0A1W2PQM2;A6NHL2;P68363;A8JZY9;B3KPS3;B3KT06;B4DDU2;P68366;Q71U36;B4DQK4;Q9UQM3	389;319;319;389;189;189;326;319;319;284;284;166;319;319;253;196	F5H5D3;P68363;P68366;Q71U36;Q9UQM3	F5H5D3	Tubulin alpha-1C chain;Tubulin alpha chain-like 3;Tubulin alpha-1B chain;Tubulin alpha-4A chain;Tubulin alpha-1A chain	TUBA1C;TUBAL3;TUBA1B;TUBA4A;TUBA1A		0.934051	11.5117	3.83701e-06	148.21	131.67	122.79	0.934051	11.5117	2.64906e-05	122.79	0.884189	8.82983	0.000226039	97.473	0.903749	9.72644	3.83701e-06	148.21		1	Y	KCDPRHGKYMACCLLYRGDVVPKDVNAAIAA;KCDPRHGKYMACCLLYRGDVVPKDVNAAIAT	B2;X;X;X;X;X;X;X;X;X;X;X;X;X;X;B2;X;X;X;X;X;X;B2;X;X;X;X;X;X;X;X	XXXXXXXXPPPPPPPPPXXXXXXXXXXXXXX	YMACCLLY(0.934)R(0.066)	Y(-117.48)M(-119.78)AC(-81.29)C(-60.08)LLY(11.51)R(-11.51)	8	2	-0.3808	By MS/MS	By MS/MS	By MS/MS	1046300000	1046300000	0	0	1.1154	288350000	251740000	339920000	0.86122	0.81078	1.1611
A8K6X3;A0A0C4DG89;Q7L014;H0Y9U3	1021;1021;1020;59	A8K6X3	A8K6X3	Probable ATP-dependent RNA helicase DDX46	DDX46		0.711791	4.04328	3.85174e-06	102.95	65.417	102.95	0.4553	0	0.000626586	84.227	0.418837	0	0.00167775	79.893	0.711791	4.04328	3.85174e-06	102.95		1	Y	ITRLIKEELIRLQNSYQPTNKGRYKVL____	X;X;X;X;X;X;X;X;X;X;X;X;X;X;X;B2;X;X;X;X;X;X;X;X;X;X;X;X;X;X;X	XXXXXXXXXXXPPPPPPPPPPXXXXXXXXXX	LQN(0.005)S(0.281)Y(0.712)Q(0.002)PTNK	LQ(-50.23)N(-21.4)S(-4.04)Y(4.04)Q(-24.57)PT(-59.5)N(-72.6)K(-77.86)	5	2	-0.64328			By MS/MS	54465000	54465000	0	0	5.5052	0	0	54465000	0	0	12.838
Q6IPN0;F8W914;Q53SY1;A6XGP7;H7C106;D6W5C2;A0A0U1RQR6;Q3LIF4;Q9NQC3	227;229;71;83;100;118;50;399;1076	Q6IPN0;Q9NQC3	Q6IPN0	Reticulon;Reticulon-4	RTN4;NOGOC;Nbla00271		0.998622	29.7952	3.91192e-06	90.05	70.573	90.05	0.998622	29.7952	5.24538e-06	90.05	0	0		NaN	0.996262	25.8811	3.91192e-06	74.962		1	Y	IQAIQKSDEGHPFRAYLESEVAISEELVQKY	X;X;X;X;X;X;X;X;X;X;X;X;X;X;X;B2;X;X;X;X;X;X;X;X;X;X;X;X;X;X;B2	XXXXXXXXXXXXXXPPPPPPPPPPPPPPPPX	AY(0.999)LE(0.001)SEVAISEELVQK	AY(29.8)LE(-29.8)S(-37.8)E(-37.8)VAIS(-70.41)E(-71.43)E(-76.65)LVQ(-89.97)K(-90.05)	2	2	-0.6528	By MS/MS	By matching	By MS/MS	235150000	235150000	0	0	NaN	42112000	34222000	81098000	NaN	NaN	NaN
V9HWB4;P11021;B4DEF7	175;175;175	V9HWB4	V9HWB4	78 kDa glucose-regulated protein	HEL-S-89n;HSPA5		0.980556	20.6889	3.92287e-06	68.329	56.608	68.329	0	0		NaN	0.980556	20.6889	3.92287e-06	68.329	0.880887	10.9014	0.000110878	56.339		1	Y	YLGKKVTHAVVTVPAYFNDAQRQATKDAGTI	X;X;X;X;X;X;X;X;X;X;X;X;X;X;X;B2;X;X;X;X;X;X;X;X;X;X;X;X;X;X;X	XXXXXPPPPPPPPPPPPPPPPPXXXXXXXXX	VTHAVVT(0.004)VPAY(0.981)FN(0.008)D(0.003)AQ(0.002)R(0.002)	VT(-54.35)H(-50.83)AVVT(-24.32)VPAY(20.69)FN(-20.69)D(-25.51)AQ(-26.46)R(-25.99)	11	3	-0.024038	By matching	By MS/MS	By MS/MS	114110000	114110000	0	0	0.47423	34114000	48127000	31873000	0.42578	0.7087	0.3442
B4E0X8;Q96AE4;A0A1Z1G4M2;A0A384MDX9;E9PEB5;B4DT31;B4DWL1;Q59FU3	437;438;438;437;438;459;437;288	B4E0X8	B4E0X8	Far upstream element-binding protein 1	FUBP1		0.977721	18.6052	3.92295e-06	102.62	72.455	91.853	0.969904	16.486	3.92295e-06	102.62	0.971435	17.4525	4.04429e-06	102.07	0.977721	18.6052	3.2905e-05	91.853		1	Y	NMKLFTIRGTPQQIDYARQLIEEKIGGPVNP	X;X;X;X;X;X;X;X;X;X;X;X;X;X;X;B2;X;X;X;X;X;X;X;X;X;X;X;X;X;X;X	XXXXXXXXPPPPPPPPPPXXXXXXXXXXXXX	GTPQQID(0.009)Y(0.978)AR(0.013)	GT(-76.59)PQ(-68.78)Q(-44.77)ID(-20.47)Y(18.61)AR(-18.61)	8	2	-0.21448	By MS/MS	By MS/MS	By MS/MS	482390000	482390000	0	0	3.5085	172480000	194730000	115180000	5.9945	3.3832	2.2514
B4E357;Q5JPB8;G3V1D3;G3V180;Q9NY33;Q53HL4;Q53GT4	315;417;436;437;417;417;417	B4E357	B4E357	Dipeptidyl peptidase 3	DKFZp686O1117;DPP3		0.920782	15.182	3.95994e-06	69.485	52.911	57.52	0.920782	15.182	0.000103257	57.52	0.714966	8.54473	0.000954777	43.454	0.863967	11.5122	3.95994e-06	69.485		1	Y	EGFKNVSLGNVLAVAYATQREKLTFLEEDDK	X;X;X;X;X;X;X;X;X;X;X;X;X;X;X;B2;X;X;X;X;X;X;X;X;X;X;X;X;X;X;X	XXXXPPPPPPPPPPPPPPPPXXXXXXXXXXX	NVSLGN(0.001)VLAVAY(0.921)AT(0.025)Q(0.025)R(0.028)	N(-52.52)VS(-42.13)LGN(-29.31)VLAVAY(15.18)AT(-15.65)Q(-15.65)R(-15.18)	12	3	-3.1259	By MS/MS	By MS/MS	By MS/MS	59692000	59692000	0	0	NaN	25284000	22136000	12273000	NaN	NaN	NaN
Q9BQ69	222	Q9BQ69	Q9BQ69	O-acetyl-ADP-ribose deacetylase MACROD1	MACROD1		0.96375	17.2982	4.07913e-06	83.602	68.916	69.525	0.96375	17.2982	5.04261e-05	69.525	0.866779	11.1485	5.20165e-05	69.071	0.959274	14.5316	4.07913e-06	83.602		1	Y	TGKAKITGGYRLPAKYVIHTVGPIAYGEPSA	X;X;X;X;X;X;X;X;X;X;X;X;X;X;X;B2;X;X;X;X;X;X;X;X;X;X;X;X;X;X;X	XXXXXXXXXXXXXXXPPPPPPPPPPPPPPPP	Y(0.964)VIH(0.018)T(0.018)VGPIAYGEPSASQAAELR	Y(17.3)VIH(-17.3)T(-17.3)VGPIAY(-36.81)GE(-38.93)PS(-48.51)AS(-55.37)Q(-58.41)AAE(-58.84)LR(-62.97)	1	3	0.0040594	By MS/MS	By MS/MS	By MS/MS	125780000	125780000	0	0	1.5157	29063000	37876000	58842000	1.5597	1.7337	1.3843
A0A024R6K8;P23381;G3V3H8;G3V3Y5	214;214;173;173	A0A024R6K8	A0A024R6K8	Tryptophan--tRNA ligase, cytoplasmic;T1-TrpRS;T2-TrpRS	WARS		0.879059	9.43286	4.30278e-06	75.695	57.535	75.695	0.879059	9.43286	4.30278e-06	75.695	0.548822	4.41583	0.000221223	61.435	0.434197	0	0.000444479	53.828		1	Y	EKYLWKDLTLDQAYSYAVENAKDIIACGFDI	X;X;X;X;X;X;X;X;X;X;X;X;X;X;X;B2;X;X;X;X;X;X;X;X;X;X;X;X;X;X;X	XXXXXXPPPPPPPPPPPPPPPPXXXXXXXXX	DLTLD(0.001)Q(0.001)AY(0.012)S(0.1)Y(0.879)AVE(0.001)N(0.002)AK(0.003)	D(-48.55)LT(-42.7)LD(-27.69)Q(-27.69)AY(-18.68)S(-9.43)Y(9.43)AVE(-27.69)N(-26.95)AK(-25.41)	10	2	-2.8255	By MS/MS	By matching		129960000	129960000	0	0	0.49029	34374000	60425000	0	0.26922	NaN	0
A0A0B4J1Z1;B4DEK2;C9JAB2;Q16629;Q8NB80	14;14;14;14;14	A0A0B4J1Z1	A0A0B4J1Z1	Serine/arginine-rich splicing factor 7	SRSF7		0.999962	44.261	4.43039e-06	75.652	54.953	75.652	0.999579	33.765	0.000425876	67.726	0.999962	44.261	4.84233e-06	75.652	0.999881	39.2494	4.43039e-06	72.478		1	Y	__MSRYGRYGGETKVYVGNLGTGAGKGELER	X;X;X;X;X;X;X;X;X;X;X;X;X;X;X;B2;X;X;X;X;X;X;X;X;X;X;X;X;X;X;X	XXXXXXXXXXXXXXPPPPPPPPPPPPPPPPP	VY(1)VGNLGTGAGK	VY(44.26)VGN(-44.26)LGT(-69.27)GAGK(-75.65)	2	2	-0.42065	By MS/MS	By MS/MS	By MS/MS	3425400000	3425400000	0	0	22.817	903440000	998820000	1166600000	25.003	19.451	18.623
F5GZQ3;B4DY96;P55084;B4DDC9;B5MD38	342;352;357;343;234	F5GZQ3	F5GZQ3	Trifunctional enzyme subunit beta, mitochondrial;3-ketoacyl-CoA thiolase	HADHB		0.596478	5.19189	4.43212e-06	105.17	80.646	105.17									0.596478	5.19189	4.43212e-06	105.17		1	Y	YVSQDPKDQLLLGPTYATPKVLEKAGLTMND	X;X;X;X;X;X;X;X;X;X;X;X;X;X;X;B2;X;X;X;X;X;X;X;X;X;X;X;X;X;X;X	XXXXXXXPPPPPPPPPPPPPXXXXXXXXXXX	DQLLLGPT(0.173)Y(0.596)AT(0.18)PK(0.05)	D(-102.49)Q(-102.49)LLLGPT(-5.38)Y(5.19)AT(-5.19)PK(-10.76)	9	2	0.0066402			By MS/MS	56466000	56466000	0	0	3.1003	0	0	56466000	0	0	8.7556
V9HWC4;Q6FIE5;Q9NRX4	97;97;97	V9HWC4	V9HWC4	14 kDa phosphohistidine phosphatase	HEL-S-132P;PHP14;PHPT1		0.782932	5.88474	4.49623e-06	84.436	70.53	84.436	0.456896	0	0.000374691	45.069					0.782932	5.88474	4.49623e-06	84.436		1	Y	QSQDKKIHVYGYSMAYGPAQHAISTEKIKAK	X;X;X;X;X;X;X;X;X;X;X;X;X;X;X;B2;X;X;X;X;X;X;X;X;X;X;X;X;X;X;X	XXXXXXPPPPPPPPPPPPPPPPPPPPPXXXX	IHVYGY(0.003)S(0.012)M(0.202)AY(0.783)GPAQHAISTEK	IH(-51.86)VY(-36.24)GY(-24.45)S(-18.17)M(-5.88)AY(5.88)GPAQ(-37.56)H(-41.76)AIS(-62.33)T(-68.46)E(-67.95)K(-67.68)	10	4	-0.1666			By MS/MS	122580000	122580000	0	0	4.094	0	0	122580000	0	0	10.134
Q9NRP2;H3BQQ1;H3BNN8;H3BTB6	36;29;36;55	Q9NRP2	Q9NRP2	COX assembly mitochondrial protein 2 homolog	CMC2		0.992835	21.4676	4.54008e-06	99.802	88.638	99.802	0.992835	21.4676	4.54008e-06	99.802	0.987317	18.9838	7.74927e-05	85.676	0.982533	17.6058	0.000337109	78.516		1	Y	LKECHKNHNILKFFGYCNDVDRELRKCLKNE	X;X;X;X;X;X;X;X;X;X;X;X;X;X;X;B2;X;X;X;X;X;X;X;X;X;X;X;X;X;X;X	XXXXXXXXXXXXPPPPPPPPPPXXXXXXXXX	FFGY(0.993)C(0.007)NDVDR	FFGY(21.47)C(-21.47)N(-40.82)D(-58.35)VD(-76.37)R(-84.14)	4	2	-1.5108	By MS/MS	By MS/MS	By MS/MS	328860000	328860000	0	0	13.956	61128000	79404000	91352000	9.643	8.7684	11.184
A0A0A6YYJ8;Q9Y383;B3KRR1;B3KSL5;B8ZZ10;A8MYV2;D3DU41;Q1W6G4;Q9NQ29	262;196;143;196;110;143;110;196;196	A0A0A6YYJ8;B8ZZ10	A0A0A6YYJ8	Putative RNA-binding protein Luc7-like 2;Putative RNA-binding protein Luc7-like 1	LUC7L2;LUC7L		0.624549	7.4841	4.64579e-06	67.416	59.97	42.813	0.616658	7.20713	4.64579e-06	67.416	0.624549	7.4841	0.000869642	50.305						1	Y	SFQQQKLRVCEVCSAYLGLHDNDRRLADHFG	X;X;X;X;X;X;X;X;X;X;X;X;X;X;X;B2;X;X;X;X;X;X;X;X;X;X;X;X;X;X;X	XXXXXXXXPPPPPPPPPPPPPPPPPXXXXXX	VC(0.075)E(0.075)VC(0.111)S(0.111)AY(0.625)LGLH(0.001)DNDR	VC(-9.19)E(-9.19)VC(-7.48)S(-7.48)AY(7.48)LGLH(-27.42)D(-32.22)N(-36.24)D(-36.24)R(-36.08)	8	3	0.69356	By MS/MS	By MS/MS		91780000	91780000	0	0	NaN	22063000	0	0	NaN	NaN	NaN
A0A024RD80;P08238;B4DMA2;Q6PK50;Q58FF7;O14942;K9JA46;P07900;Q2VPJ6;G3V2J8;Q14568;B4DTA5;Q86SX1;Q58FF8	56;56;56;56;56;7;61;61;61;61;61;61;183;56	A0A024RD80;K9JA46;Q58FF8	A0A024RD80	Heat shock protein HSP 90-beta;Putative heat shock protein HSP 90-beta-3;Heat shock protein HSP 90-alpha;Heat shock protein HSP 90-alpha A2;Putative heat shock protein HSP 90-beta 2	HSP90AB1;HSP90AB3P;EL52;HSP90AA1;HSP90AA2P;HSP90AB2P		0.977788	16.4367	4.71657e-06	154.28	134.52	154.28	0.79772	5.97196	0.000137671	107.69	0.797176	5.95505	3.94596e-05	119.21	0.977788	16.4367	4.71657e-06	154.28		1	Y	RELISNASDALDKIRYESLTDPSKLDSGKEL;RELISNSSDALDKIRYESLTDPSKLDSGKEL;WELISNASDALDKIRYESLTDPSKLDSGKEL	X;X;X;X;X;X;X;X;X;X;X;X;X;X;B2;B2;X;X;X;X;X;X;X;X;X;X;X;X;X;X;X	XXXXXXXXXXXXXXXPPPPPPPPPPPPPPXX	Y(0.978)E(0.022)SLTDPSK	Y(16.44)E(-16.44)S(-62.5)LT(-100.53)D(-120.48)PS(-150.35)K(-154.28)	1	2	-0.17306	By MS/MS	By MS/MS	By MS/MS	6275600000	6275600000	0	0	11.262	2083700000	2082500000	1797100000	15.404	10.686	7.9145
Q58FF6	32	Q58FF6	Q58FF6	Putative heat shock protein HSP 90-beta 4	HSP90AB4P		0.977788	16.4367	4.71657e-06	154.28	134.52	154.28	0.79772	5.97196	0.000137671	107.69	0.797176	5.95505	3.94596e-05	119.21	0.977788	16.4367	4.71657e-06	154.28		1	Y	QELISNASDALDKIRYESLTDPSKLDGGKEL	X;X;X;X;X;X;X;X;X;X;X;X;X;X;X;B2;X;X;X;X;X;X;X;X;X;X;X;X;X;X;X	XXXXXXXXXXXXXXXPPPPPPPPPXXXXXXX	Y(0.978)E(0.022)SLTDPSK	Y(16.44)E(-16.44)S(-62.5)LT(-100.53)D(-120.48)PS(-150.35)K(-154.28)	1	2	-0.17306	By MS/MS	By MS/MS	By MS/MS	6275600000	6275600000	0	0	11.262	2083700000	2082500000	1797100000	15.404	10.686	7.9145
P17858;B3KNQ7;Q9BSP4;Q7L2M7	761;348;467;549	P17858	P17858	ATP-dependent 6-phosphofructokinase, liver type	PFKL		0.816003	6.69496	4.71994e-06	82.663	63.588	82.663	0.816003	6.69496	4.71994e-06	82.663	0.437894	0	0.00764126	48.423	0.439116	0	0.00392794	51.265		1	Y	LMLKMLAQYRISMAAYVSGELEHVTRRTLSM	X;X;X;X;X;X;X;X;X;X;X;X;X;X;X;B2;X;X;X;X;X;X;X;X;X;X;X;X;X;X;X	XXXXXXXXXXPPPPPPPPPPPPPPPPXXXXX	IS(0.007)M(0.175)AAY(0.816)VS(0.002)GELEHVTR	IS(-20.56)M(-6.69)AAY(6.69)VS(-25.79)GE(-48.47)LE(-66.88)H(-73.92)VT(-77.35)R(-77.23)	6	3	0.20133	By MS/MS			48905000	48905000	0	0	NaN	48905000	0	0	NaN	NaN	NaN
V9HWB8;P14618;A0A024R5Z9;B4DNK4;B4DRT3;H3BTN5;A0A024R609;H3BQ34;H3BUW1;H3BTJ2;H3BT25	148;148;148;74;128;148;148;148;148;148;148	V9HWB8	V9HWB8	Pyruvate kinase;Pyruvate kinase PKM	HEL-S-30;PKM;PKM2		0.899844	9.96731	4.77477e-06	98.73	81.404	95.775	0.899844	9.96731	5.42164e-06	95.775	0.675786	4.48503	0.000404816	76.85	0.695161	3.82125	4.77477e-06	98.73		1	Y	ELKKGATLKITLDNAYMEKCDENILWLDYKN	X;X;X;X;X;X;X;X;X;X;X;X;X;X;X;B2;X;X;X;X;X;X;X;X;X;X;X;X;X;B2;X	XXXXXXXXXPPPPPPPPPPXXXXXXXXXXXX	ITLDNAY(0.9)M(0.091)E(0.005)K(0.004)	IT(-87.03)LD(-45.73)N(-33.19)AY(9.97)M(-9.97)E(-22.58)K(-23.45)	7	2	-0.47274	By MS/MS	By MS/MS	By MS/MS	1996100000	1996100000	0	0	6.0286	498390000	701550000	796210000	5.5817	5.2461	7.3658
B2R9X3;O60547	231;231	B2R9X3	B2R9X3	GDP-mannose 4,6 dehydratase	GMDS		0.997374	26.0447	4.79035e-06	82.259	58.105	82.259	0	0		NaN	0.997374	26.0447	0.000164808	82.259	0.986625	19.0847	4.79035e-06	66.289		1	Y	ANFVTRKISRSVAKIYLGQLECFSLGNLDAK	X;X;X;X;X;X;X;X;X;X;X;X;X;X;X;B2;X;X;X;X;X;X;X;X;X;X;X;X;X;X;X	XXXXXXXXXXXXXXPPPPPPPPPPPPPPPPP	IY(0.997)LGQ(0.002)LECFSLGNLDAK	IY(26.04)LGQ(-26.04)LE(-39.88)C(-47.08)FS(-46.15)LGN(-63.19)LD(-72.5)AK(-77.36)	2	3	-0.074345	By matching	By matching	By MS/MS	125450000	125450000	0	0	NaN	34630000	45285000	45536000	NaN	NaN	NaN
A0A6I8PIV1;B2RCM2;Q9P2J5;B4DER1;A0A6I8PIT3;A0A6I8PLB8;A0A6I8PRS0;B4E266;A0A6I8PL42;A0A6I8PLB3;A0A6I8PS05;A0A6I8PIP7;A0A6I8PTV8;A0A6I8PRU9;Q6NVI4	214;214;214;187;214;214;160;168;168;160;87;214;214;214;214	A0A6I8PIV1	A0A6I8PIV1	Leucine--tRNA ligase, cytoplasmic	LARS		0.764773	8.4823	4.80571e-06	90.653	71.908	90.653	0.764773	8.4823	4.80571e-06	90.653	0.739187	8.01552	6.75142e-06	69.451						1	Y	VDWRRSFITTDVNPYYDSFVRWQFLTLRERN	X;X;X;X;X;X;X;X;X;X;X;X;X;X;X;B2;X;X;X;X;X;X;X;X;X;X;X;X;X;X;X	XXXXXPPPPPPPPPPPPPPPPXXXXXXXXXX	SFITTDVNPY(0.108)Y(0.765)D(0.108)S(0.016)FVR(0.002)	S(-77.67)FIT(-60.1)T(-51.87)D(-51.87)VN(-35.25)PY(-8.48)Y(8.48)D(-8.48)S(-16.87)FVR(-25.15)	11	2	-0.3669	By MS/MS	By MS/MS		52370000	52370000	0	0	0.18047	23991000	28379000	0	0.18111	0.33491	0
Q53FJ5;A0A024QZQ2;C9JIZ6;Q59EN5;P07602;B4DEK5;B4DRB7	89;89;89;92;89;14;89	Q53FJ5	Q53FJ5	Prosaposin;Saposin-A;Saposin-B-Val;Saposin-B;Saposin-C;Saposin-D	PSAP		0.506934	2.55797	4.96155e-06	103.89	75.403	87.442					0.502096	2.3879	4.96155e-06	103.89	0.506934	2.55797	0.000112242	87.442		1	Y	GDMLKDNATEEEILVYLEKTCDWLPKPNMSA	X;X;X;X;X;X;X;X;X;X;X;X;X;X;X;B2;X;X;X;X;X;X;X;X;X;X;X;X;X;X;X	XXXXXPPPPPPPPPPPPPPXXXXXXXXXXXX	DNATEEEILVY(0.507)LE(0.212)K(0.281)	D(-86.88)N(-86.88)AT(-77.13)E(-70.39)E(-64.43)E(-50.19)ILVY(2.56)LE(-3.79)K(-2.56)	11	2	0.48789		By MS/MS	By MS/MS	161880000	161880000	0	0	1.2234	0	64884000	96996000	0	1.3401	1.9918
Q8N1H4;Q68DZ9;Q59GA1;B2RDQ3;P62995;H7BXF3;H7C2L4	199;223;223;235;235;94;55	Q8N1H4	Q8N1H4	Transformer-2 protein homolog beta	DKFZp686F18120;TRA2B		0.897441	10.5703	5.01537e-06	102.62	87.249	102.62	0.897441	10.5703	5.01537e-06	102.62					0.209376	0	0.0186222	43.958		1	Y	DYYDRGYDRGYDDRDYYSRSYRGGGGGGGGW	X;X;X;X;X;X;X;X;X;X;X;X;X;X;X;B2;X;X;X;X;X;X;X;X;X;X;X;X;X;X;X	XXXXXXXXXPPPPPPPPPPXXXXXXXXXXXX	GYDDRD(0.001)Y(0.897)Y(0.079)S(0.02)R(0.003)	GY(-92.84)D(-85.53)D(-67.18)R(-53.2)D(-32.37)Y(10.57)Y(-10.57)S(-16.49)R(-24.51)	7	2	2.1771	By MS/MS			199080000	199080000	0	0	1.6813	199080000	0	0	8.206	0	0
Q15366;H3BRU6;B4DRD7	278;214;195	Q15366	Q15366	Poly(rC)-binding protein 2	PCBP2		0.757496	8.88	5.04069e-06	51.539	40.936	51.539	0.757496	8.88	5.04069e-06	51.539										1	Y	TGFSGIESSSPEVKGYWGLDASAQTTSHELT	X;X;X;X;X;X;X;X;X;X;X;X;X;X;X;B2;X;X;X;X;X;X;X;X;X;X;X;X;X;X;X	XXXXXXXXXXXXXXPPPPPPPPPPPPPPPPP	GY(0.757)W(0.098)GLD(0.021)AS(0.022)AQ(0.022)T(0.022)T(0.022)S(0.022)H(0.006)E(0.006)LT(0.001)IPNDLIGCIIGR	GY(8.88)W(-8.88)GLD(-15.62)AS(-15.34)AQ(-15.34)T(-15.34)T(-15.34)S(-15.34)H(-21.19)E(-20.68)LT(-31.47)IPN(-41.66)D(-46.33)LIGC(-51.52)IIGR(-51.54)	2	3	-2.1992	By MS/MS			129060000	129060000	0	0	NaN	129060000	0	0	NaN	NaN	NaN
V9HWB9;P00338;B4DJI1;F5GXY2;F5GYU2;F5GXH2;F5H5J4;F5H6W8;F5GZQ4;F5H8H6;F5GXC7;F5GWW2;F5GXU1	10;10;10;10;10;10;10;10;10;10;10;10;10	V9HWB9	V9HWB9	L-lactate dehydrogenase;L-lactate dehydrogenase A chain	HEL-S-133P;LDHA		0.991057	20.4463	5.0686e-06	142.19	110.06	142.19	0.987973	19.154	5.71204e-06	137.88	0.991057	20.4463	5.0686e-06	142.19	0.987961	19.154	0.000236564	105.25		1	Y	______MATLKDQLIYNLLKEEQTPQNKITV	X;X;X;X;X;X;X;X;X;X;X;X;X;X;X;B2;X;X;X;X;X;X;X;X;X;X;X;X;X;X;X	XXXXXXXXXXXPPPPPPPPPPPPPPPPPXXX	DQLIY(0.991)N(0.009)LLK	D(-103.87)Q(-103.87)LIY(20.45)N(-20.45)LLK(-67)	5	2	-0.8491	By MS/MS	By MS/MS	By MS/MS	24927000000	24927000000	0	0	43.028	12249000000	11002000000	290690000	167.17	67.028	0.85015
Q9Y2B0;F8W1K5;F8VXJ7	71;19;71	Q9Y2B0	Q9Y2B0	Protein canopy homolog 2	CNPY2		0.866943	8.14691	5.0894e-06	71.555	45.818	71.555	0.866943	8.14691	5.0894e-06	71.555	0.745809	4.70057	0.000150865	54.859						1	Y	FRINPDGSQSVVEVPYARSEAHLTELLEEIC	X;X;X;X;X;X;X;X;X;X;X;X;X;X;X;B2;X;X;X;X;X;X;X;X;X;X;X;X;X;X;X	XXPPPPPPPPPPPPPPPPXXXXXXXXXXXXX	INPDGSQSVVEVPY(0.867)AR(0.133)	IN(-65.9)PD(-65.61)GS(-65.61)Q(-61.5)S(-56.17)VVE(-35.91)VPY(8.15)AR(-8.15)	14	2	0.085621	By MS/MS	By MS/MS		106970000	106970000	0	0	3.766	51026000	0	0	7.8994	0	0
B2R8Z8;O60506;Q05CK9;Q59GL1;B7Z645	205;205;241;177;107	B2R8Z8	B2R8Z8	Heterogeneous nuclear ribonucleoprotein Q	SYNCRIP		1	69.2127	5.30426e-06	96.311	69.213	96.311	1	69.2127	5.30426e-06	96.311	0.999367	32.2862	0.00381362	51.066	0.999847	38.4691	0.00222336	57.249		1	Y	DLRLMMDPLTGLNRGYAFVTFCTKEAAQEAV	X;X;X;X;X;X;X;X;X;X;X;X;X;X;X;B2;X;X;X;X;X;X;X;X;X;X;X;X;X;X;X	XXXXXXXXXXXXXXPPPPPPPPPPXXXXXXX	GY(1)AFVTFCTK	GY(69.21)AFVT(-69.21)FC(-88.13)T(-93.94)K(-96.31)	2	2	-1.5265	By MS/MS	By MS/MS	By MS/MS	250870000	250870000	0	0	NaN	94675000	117560000	38633000	NaN	NaN	NaN
A0A384NKW7;P55060;B4DUC5;B4DM31;B4DM67;B4DPS6	369;369;152;160;270;58	A0A384NKW7	A0A384NKW7	Exportin-2	CSE1L		0.76994	8.14253	5.31389e-06	77.593	66.688	77.593	0	0		NaN	0.76994	8.14253	5.31389e-06	77.593						1	Y	FRAADEEAFEDNSEEYIRRDLEGSDIDTRRR	X;X;X;X;X;X;X;X;X;X;X;X;X;X;X;B2;X;X;X;X;X;X;X;X;X;X;X;X;X;X;X	XXPPPPPPPPPPPPPPPPXXXXXXXXXXXXX	AADEEAFEDN(0.001)S(0.002)E(0.015)E(0.094)Y(0.77)IR(0.118)	AAD(-73.51)E(-70.55)E(-62.22)AFE(-40.92)D(-35.9)N(-30.8)S(-24.9)E(-17.1)E(-9.15)Y(8.14)IR(-8.14)	14	2	-0.47372	By matching	By MS/MS		49169000	49169000	0	0	0.035809	20924000	28245000	0	0.052597	0.057745	0
E7EX17;B4DRM3;P23588;B4DEP6;F8VX11;F8VSC7;F8W0K0;F8VYE9;F8VRU1;F8VP89	105;105;105;105;105;105;59;105;105;105	E7EX17;F8VP89	E7EX17	Eukaryotic translation initiation factor 4B	EIF4B		0.754227	5.93818	5.36202e-06	81.477	68.671	81.477	0.49317	3.53317	0.000132358	64.615	0.754227	5.93818	5.36202e-06	81.477	0.592251	3.19135	0.000238474	49.333		1	Y	LPKSPPYTAFLGNLPYDVTEESIKEFFRGLN	X;X;X;X;X;X;X;X;X;X;X;X;X;X;X;B2;X;X;X;X;X;X;X;X;X;X;X;X;X;X;X	XXXPPPPPPPPPPPPPPPPPPPPPPPPPXXX	SPPY(0.001)T(0.001)AFLGN(0.038)LPY(0.754)D(0.192)VT(0.013)E(0.001)ESIKEFFR	S(-32.79)PPY(-30.18)T(-30.69)AFLGN(-13.03)LPY(5.94)D(-5.94)VT(-17.5)E(-29.65)E(-40.94)S(-45.82)IK(-53.44)E(-56.75)FFR(-62.93)	13	3	-1.3707		By MS/MS	By MS/MS	595040000	595040000	0	0	0.39492	0	329140000	0	0	0.65494	0
F5H5D3;Q9BQE3;Q53GA7;B7Z1K5;Q8N532;A0A1W2PQM2;F8VVB9;F8VS66;F8VRZ4;F8VWV9;F8VX09;Q6QMJ5;A6NHL2;P68363;A8JZY9;B3KPS3;B3KT06;P68366;C9JEV8;C9JQ00;C9JJQ8;C9JDL2;Q71U36;Q1ZYQ1;P0DPH8;P0DPH7;F8VQQ4	173;103;103;173;103;103;103;103;68;68;68;29;110;103;103;68;68;103;88;88;126;105;103;103;103;103;68	F5H5D3;P68363;P68366;Q71U36	F5H5D3	Tubulin alpha-1C chain;Tubulin alpha chain-like 3;Tubulin alpha-1B chain;Tubulin alpha-4A chain;Tubulin alpha-1A chain	TUBA1C;TUBA1B;TUBA1A;TUBA1;TUBAL3;TUBA4A;TUBA2		0.998744	29.6376	5.40643e-06	163.72	148.09	163.72	0.875417	9.39748	0.000247681	94.662	0.992696	21.9452	6.81576e-06	160.78	0.998744	29.6376	5.40643e-06	163.72		1	Y	HPEQLITGKEDAANNYARGHYTIGKEIIDLV;HPEQLITGKEDAANNYARGHYTIGKEIIDPV	X;X;X;X;X;X;X;X;X;X;X;X;X;X;X;B2;X;X;X;B2;B2;X;X;X;B2;X;X;X;X;X;X	XXXXXXXXXPPPPPPPPPXXXXXXXXXXXXX	EDAANNY(0.999)AR(0.001)	E(-141.57)D(-142.82)AAN(-83.62)N(-37.69)Y(29.64)AR(-29.64)	7	2	-1.4699	By MS/MS	By MS/MS	By MS/MS	10285000000	10285000000	0	0	798.77	3438900000	3414500000	1689000000	736.89	415.91	NaN
Q7Z426;Q92734;Q7Z427	388;392;350	Q7Z426	Q7Z426	Protein TFG	TFG		0.787445	6.77658	5.41699e-06	67.326	54.943	67.326									0.787445	6.77658	5.41699e-06	67.326		1	Y	GPNPYARNRPPFGQGYTQPGPGYR_______	X;X;X;X;X;X;X;X;X;X;X;X;X;X;X;B2;X;X;X;X;X;X;X;X;X;X;X;X;X;X;X	XXXXXXXPPPPPPPPPPPPPPPPPXXXXXXX	N(0.002)R(0.002)PPFGQ(0.036)GY(0.787)T(0.165)Q(0.007)PGPGYR	N(-26.47)R(-26.47)PPFGQ(-13.34)GY(6.78)T(-6.78)Q(-20.44)PGPGY(-49.09)R(-53.02)	9	3	0.31922			By MS/MS	33236000	33236000	0	0	NaN	0	0	33236000	NaN	NaN	NaN
A0A024R8S5;P07237;B4DUA5;H7BZ94;B4DNL5;B4DLN6;B4DJS0;I3NI03;I3L3U6;I3L3P5;B4DNP9	94;94;94;94;78;94;94;94;94;58;94	A0A024R8S5	A0A024R8S5	Protein disulfide-isomerase	P4HB		0.865257	8.71743	5.57399e-06	79.659	66.606	79.659	0.865257	8.71743	6.41443e-06	79.659	0.579952	2.66728	0.000285414	61.344	0.852662	8.47534	5.57399e-06	70.942		1	Y	LAKVDATEESDLAQQYGVRGYPTIKFFRNGD	X;X;X;X;X;X;X;X;X;X;X;X;X;X;X;B2;X;X;X;X;X;X;X;X;X;X;X;X;X;X;X	XXXPPPPPPPPPPPPPPPPXXXXXXXXXXXX	VDATEESDLAQ(0.002)Q(0.116)Y(0.865)GVR(0.017)	VD(-73.63)AT(-68.75)E(-66.65)E(-66.65)S(-61.52)D(-55.98)LAQ(-26.42)Q(-8.72)Y(8.72)GVR(-17.19)	13	2	0.060709	By MS/MS	By MS/MS	By MS/MS	30795000	30795000	0	0	0.090773	17182000	0	13613000	0.12398	0	0.13201
E7EMN6;Q6NXS1;P41236;Q6ZU68	122;148;148;148	E7EMN6	E7EMN6	Protein phosphatase inhibitor 2-like protein 3;Protein phosphatase inhibitor 2	PPP1R2;PPP1R2P3		0.83242	7.43079	5.80743e-06	95.608	75.611	95.608	0.760556	5.71098	0.000439899	70.552	0.83242	7.43079	5.80743e-06	95.608	0.749922	4.98409	0.000350297	78.192		1	Y	EREKKRQFEMKRKLHYNEGLNIKLARQLISK	X;X;X;X;X;X;X;X;X;X;X;X;X;X;X;B2;X;X;X;X;X;X;X;X;X;X;X;X;X;X;X	XXXXXXXXXXXXXPPPPPPPPPPXXXXXXXX	LH(0.01)Y(0.832)N(0.15)E(0.007)GLNIK	LH(-19.26)Y(7.43)N(-7.43)E(-20.56)GLN(-66.46)IK(-85.14)	3	2	0.53644	By MS/MS	By MS/MS	By MS/MS	229070000	229070000	0	0	NaN	37636000	41783000	44080000	NaN	NaN	NaN
C9JXB8;C9JNW5;V9HW01;P83731	55;55;55;55	C9JXB8	C9JXB8	60S ribosomal protein L24	RPL24;HEL-S-310		0.9171	10.4388	5.92962e-06	132.57	103.42	132.57	0.9171	10.4388	5.92962e-06	132.57	0.909341	10.0158	0.000195398	109.01	0.899537	9.5234	0.000163721	110.81		1	Y	FLSKRNPRQINWTVLYRRKHKKGQSEEIQKK	X;X;X;X;X;X;X;X;X;X;X;X;X;X;X;B2;X;X;X;X;X;B2;X;X;X;X;X;X;X;X;X	XXXXXXXXPPPPPPPPPXXXXXXXXXXXXXX	QINWTVLY(0.917)R(0.083)	Q(-125.35)IN(-89.44)W(-62.57)T(-57.35)VLY(10.44)R(-10.44)	8	2	-0.6744	By MS/MS	By MS/MS	By MS/MS	273430000	273430000	0	0	2.7134	78244000	84445000	110740000	2.4862	2.0259	4.0102
B4DSU5;B4DSS8;Q9UKA9;B4DI28	252;255;244;213	B4DSU5	B4DSU5	Polypyrimidine tract-binding protein 2	PTBP2		0.969457	15.4298	6.01151e-06	78.903	58.032	78.903					0.823099	12.317	0.000186146	57.164	0.969457	15.4298	6.01151e-06	78.903		1	Y	VNAQQAKLALDGQNIYNACCTLRIDFSKLVN	X;X;X;X;X;X;X;X;X;X;X;X;X;X;X;B2;X;X;X;X;X;X;X;X;X;X;X;X;X;X;X	XXXXXXXPPPPPPPPPPPPPPPPXXXXXXXX	LALDGQN(0.002)IY(0.969)N(0.028)ACCTLR	LALD(-34.06)GQ(-34.06)N(-27.62)IY(15.43)N(-15.43)AC(-35.93)C(-41.76)T(-47.42)LR(-52.89)	9	2	0.65008		By MS/MS	By MS/MS	67955000	67955000	0	0	NaN	0	34383000	33572000	NaN	NaN	NaN
J3KTL2;Q07955;Q59FA2;A8K1L8	72;72;104;72	J3KTL2	J3KTL2	Serine/arginine-rich splicing factor 1	SRSF1		0.991071	20.4534	6.02564e-06	130.22	72.054	129.47	0.909905	11.8061	0.000278883	93.374	0.991071	20.4534	6.05654e-06	129.47	0.988683	19.4134	6.02564e-06	130.22		1	Y	AFVEFEDPRDAEDAVYGRDGYDYDGYRLRVE	X;X;X;X;X;X;X;X;X;X;X;X;X;X;X;B2;X;X;B2;X;X;X;X;X;X;B2;X;X;X;X;X	XXXXXXXXXPPPPPPPPPXXXXXXXXXXXXX	DAEDAVY(0.991)GR(0.009)	D(-116.88)AE(-87.81)D(-61.49)AVY(20.45)GR(-20.45)	7	2	0.2712	By MS/MS	By MS/MS	By MS/MS	1514800000	1514800000	0	0	1.6239	408410000	486470000	521840000	1.5886	1.621	1.3894
J3QQY2;B7Z591;Q9UM00;J3KS45	40;112;175;112	J3QQY2	J3QQY2	Transmembrane and coiled-coil domain-containing protein 1	TMCO1		0.83331	7.10204	6.02646e-06	92.939	61.413	92.939	0.777432	5.59576	9.90966e-06	74.853	0.601988	1.79973	8.25835e-06	91.307	0.83331	7.10204	6.02646e-06	92.939		1	Y	FDGRVVAKLPFTPLSYIQGLSHRNLLGDDTT	X;X;X;X;X;X;X;X;X;X;X;X;X;X;X;B2;X;X;X;X;X;X;X;X;X;X;X;X;X;X;X	XXXXXXXXPPPPPPPPPPPPPPPXXXXXXXX	LPFTPLS(0.162)Y(0.833)IQ(0.004)GLSHR	LPFT(-38.85)PLS(-7.1)Y(7.1)IQ(-23.02)GLS(-50.62)H(-49.91)R(-56.65)	8	3	-1.3842	By MS/MS	By MS/MS	By MS/MS	114470000	114470000	0	0	2.3268	26971000	40150000	47352000	2.318	3.0075	1.9557
Q86T74;A0A024R3E4;P46937	79;188;188	Q86T74	Q86T74	Transcriptional coactivator YAP1	DKFZp451O0517;YAP1		0.940884	14.9254	6.26911e-06	64.52	33.97	64.52					0.940884	14.9254	6.26911e-06	64.52						1	Y	LPAGWEMAKTSSGQRYFLNHIDQTTTWQDPR	X;X;X;X;X;X;X;X;X;X;X;X;X;X;X;B2;X;X;X;X;X;X;X;X;X;X;X;X;X;X;X	XXXXXXXXXXXXXXXPPPPPPPPPPPPPPPP	Y(0.941)FLN(0.026)H(0.03)ID(0.002)QTT(0.001)TWQDPR	Y(14.93)FLN(-15.62)H(-14.93)ID(-26.75)Q(-39.6)T(-44.13)T(-32.37)T(-36.88)W(-41.72)Q(-41.72)D(-41.72)PR(-54.6)	1	3	-0.50567		By MS/MS		49861000	49861000	0	0	NaN	0	49861000	0	NaN	NaN	NaN
Q59ET0;Q04446	89;37	Q59ET0	Q59ET0	1,4-alpha-glucan-branching enzyme	GBE1		0.804145	7.55741	6.26947e-06	66.335	44.802	65.716	0.462917	0	1.63895e-05	66.335	0.778412	6.73582	6.26947e-06	65.716	0.804145	7.55741	6.26947e-06	65.716		1	Y	LADVPELARLLEIDPYLKPYAVDFQRRYKQF	X;X;X;X;X;X;X;X;X;X;X;X;X;X;X;B2;X;X;X;X;X;X;X;X;X;X;X;X;X;X;X	XXXXXXXXXPPPPPPPPPPPPPPPPPXXXXX	LLE(0.025)ID(0.141)PY(0.804)LK(0.029)PY(0.001)AVDFQR	LLE(-15.06)ID(-7.56)PY(7.56)LK(-14.45)PY(-31.22)AVD(-37.5)FQ(-44.18)R(-43.88)	7	3	-0.74351		By MS/MS	By MS/MS	144210000	144210000	0	0	NaN	0	70115000	74092000	NaN	NaN	NaN
A0A024R228;P61978;B3KU16;B4DUQ1;Q5T6W2;Q5EC54;B4DFF1	280;280;40;256;256;280;275	A0A024R228;B4DUQ1;Q5EC54	A0A024R228	Heterogeneous nuclear ribonucleoprotein K	HNRPK;HNRNPK		0.603329	5.41623	6.41412e-06	137.14	103.34	114.89	0.469715	0	6.41412e-06	137.14	0.475978	0	0.0156993	67.903	0.603329	5.41623	0.00010231	114.89		1	Y	PPGRGGRPMPPSRRDYDDMSPRRGPPPPPPG	X;X;X;X;X;X;X;X;X;X;X;X;X;X;X;B2;X;X;X;X;X;X;X;X;X;X;X;X;X;X;X	XXXXXXXXXXXXXPPPPPPPPPXXXXXXXXX	R(0.05)D(0.173)Y(0.603)D(0.173)DMSPR	R(-10.84)D(-5.42)Y(5.42)D(-5.42)D(-34.46)M(-67.24)S(-75.93)PR(-107.67)	3	2	-0.18516			By MS/MS	62632000	62632000	0	0	0.41818	0	0	62632000	0	0	0.73986
A0A0S2Z4Z0;Q96PK6;Q59GV2	273;273;207	A0A0S2Z4Z0	A0A0S2Z4Z0	RNA-binding protein 14	RBM14		0.892338	9.52934	6.46793e-06	104.22	85.416	104.22	0.892338	9.52934	6.46793e-06	104.22					0.856579	8.3665	0.000172832	87.568		1	Y	GVGYRTQPMTAQAASYRAQPSVSLGAPYRGQ	X;X;X;B2;B2;X;X;X;X;X;X;X;X;X;X;B2;X;X;X;X;X;X;X;X;X;X;X;B2;B2;X;X	XXXXXPPPPPPPPPPPPXXXXXXXXXXXXXX	TQPMTAQAAS(0.008)Y(0.892)R(0.099)	T(-98.44)Q(-98.44)PM(-88.59)T(-79.84)AQ(-61.89)AAS(-20.36)Y(9.53)R(-9.53)	11	2	1.4427	By MS/MS		By MS/MS	49463000	49463000	0	0	1.7286	28936000	0	20527000	3.161	0	1.9957
E7ETK0;A0A2R8Y849;A0A2R8YD14;P62847;A0A2R8Y8A0	81;81;81;81;40	E7ETK0	E7ETK0	40S ribosomal protein S24	RPS24		0.777272	7.98863	6.68576e-06	92.457	74.951	92.457	0	0		NaN	0.588944	3.09674	2.42346e-05	80.737	0.777272	7.98863	6.68576e-06	92.457		1	Y	GGKTTGFGMIYDSLDYAKKNEPKHRLARHGL	X;X;X;X;X;X;X;X;X;X;X;X;X;X;X;B2;X;X;X;X;X;X;X;X;X;X;X;X;X;X;X	XXXPPPPPPPPPPPPPPPXXXXXXXXXXXXX	TTGFGMIYDSLD(0.099)Y(0.777)AK(0.124)	T(-90.39)T(-90.39)GFGM(-80.43)IY(-56.01)D(-40.91)S(-33.63)LD(-8.96)Y(7.99)AK(-7.99)	13	3	-1.3607		By MS/MS	By MS/MS	664260000	664260000	0	0	2.4905	0	175670000	246150000	0	1.8179	2.2067
Q9Y508;A0A096LNV3;A0A096LP02;B4DLW5;H0UI65	139;139;139;66;22	Q9Y508	Q9Y508	E3 ubiquitin-protein ligase RNF114	RNF114;ZNF313		0.722818	4.16264	6.70336e-06	103.42	86.394	103.42	0.722818	4.16264	6.70336e-06	103.42	0.499999	0	0.000153849	86.18	0.499993	0	0.000211468	83.358		1	Y	TIKDASLQPRNVPNRYTFPCPYCPEKNFDQE	X;X;X;X;X;X;X;X;X;X;X;X;X;X;X;B2;X;X;X;X;X;X;X;X;X;X;X;X;X;X;X	XXXXXXXXXXXXXXXPPPPPPPPPPPXXXXX	Y(0.723)T(0.277)FPCPYCPEK	Y(4.16)T(-4.16)FPC(-65.83)PY(-79.3)C(-93.33)PE(-102.04)K(-103.42)	1	2	-1.2682	By MS/MS	By MS/MS	By MS/MS	279960000	279960000	0	0	9.3151	78598000	95596000	105770000	9.5756	7.6556	11.3
A0A3B3IT54;Q9H7E9;A0A3B3IRR6;A0A3B3ITA3	186;186;186;186	A0A3B3IT54	A0A3B3IT54	UPF0488 protein C8orf33	C8orf33		0.959179	13.7837	6.72575e-06	88.021	56.648	88.021	0	0		NaN	0	0		NaN	0.959179	13.7837	6.72575e-06	88.021		1	Y	EAEWREALRALRAAAYSAQVQPVDGATRKKS	X;X;X;X;X;X;X;X;X;X;X;X;X;X;X;B2;X;X;X;X;X;X;X;X;X;X;X;X;X;X;X	XXXXXXXXXXXXPPPPPPPPPPPPPPPPXXX	AAAY(0.959)S(0.04)AQ(0.001)VQPVDGATR	AAAY(13.78)S(-13.78)AQ(-31.47)VQ(-58.48)PVD(-82.54)GAT(-85.88)R(-88.02)	4	2	1.381	By matching	By matching	By MS/MS	82024000	82024000	0	0	11.712	29964000	37147000	14914000	15.853	16.523	5.2056
H7BXR3;B3KPU4;H7C1R7	350;208;108	H7BXR3	H7BXR3		SORBS2		0.58045	4.55002	7.59043e-06	64.035	49.563	50.189	0.58045	4.55002	4.32388e-05	50.189	0.366678	0	7.59043e-06	64.035	0.412879	2.94387	0.000171605	42.698		1	Y	YVQDHSSGVFNEASLYQSSIDRSLERPMSSA	X;X;X;X;X;X;X;X;X;X;X;X;X;X;X;B2;X;X;X;X;X;X;X;X;X;X;X;X;X;X;X	PPPPPPPPPPPPPPPPPPPPPPXXXXXXXXX	KPLDYVQDH(0.001)S(0.001)S(0.001)GVFN(0.091)E(0.091)AS(0.204)LY(0.58)Q(0.018)S(0.007)S(0.003)ID(0.001)R	K(-37.4)PLD(-37.7)Y(-35.23)VQ(-33.23)D(-33.23)H(-30.48)S(-27.59)S(-27.59)GVFN(-8.02)E(-8.02)AS(-4.55)LY(4.55)Q(-14.99)S(-19.02)S(-22.88)ID(-30.07)R(-33.62)	20	4	1.5524	By MS/MS			21260000	21260000	0	0	NaN	21260000	0	0	NaN	NaN	NaN
Q6IAV3;K7EM18;P41567;K7EQP2;Q6FG85;O60739;Q53F41	79;79;79;27;79;79;79	Q6IAV3;Q6FG85	Q6IAV3	Eukaryotic translation initiation factor 1;Eukaryotic translation initiation factor 1b	SUI1;EIF1;GC20;EIF1B		0.706989	6.78888	7.6267e-06	89.365	74.905	81.373	0.409727	0	7.6267e-06	89.365	0.706989	6.78888	7.75696e-06	81.373	0.322454	0	0.000129078	53.998		1	Y	KKKFACNGTVIEHPEYGEVIQLQGDQRKNIC	X;X;X;X;X;X;X;X;X;X;X;X;X;X;X;B2;X;X;X;X;X;X;X;X;X;X;X;X;X;X;X	XXXPPPPPPPPPPPPPPPPPPPPPPPPXXXX	FAC(0.001)N(0.001)GT(0.001)VIE(0.001)H(0.025)PE(0.117)Y(0.707)GE(0.148)VIQLQGDQR	FAC(-30.52)N(-28.89)GT(-29.31)VIE(-30.14)H(-14.5)PE(-7.83)Y(6.79)GE(-6.79)VIQ(-37.12)LQ(-43.14)GD(-49.6)Q(-55.97)R(-55.7)	13	3	-0.49281		By MS/MS		1954900000	1954900000	0	0	1.3061	0	1954900000	0	0	5.1159	0
P50238;K4DIB9;H3BRQ4	57;26;29	P50238	P50238	Cysteine-rich protein 1	CRIP1		0.754474	7.05074	7.78508e-06	51.956	44.244	46.797	0.754474	7.05074	0.000825064	46.797	0.427087	0	0.00269943	40.751	0.387862	0	7.78508e-06	51.956		1	Y	GHAEHEGKPYCNHPCYAAMFGPKGFGRGGAE	X;X;X;X;X;X;X;X;X;X;X;X;X;X;X;B2;X;X;X;X;X;X;X;X;X;X;X;X;X;X;X	XXXXXXXXPPPPPPPPPPPPPPPXXXXXXXX	PYC(0.003)N(0.009)H(0.033)PC(0.149)Y(0.754)AAM(0.05)FGPK(0.001)	PY(-33.73)C(-24.47)N(-19.06)H(-13.65)PC(-7.05)Y(7.05)AAM(-11.76)FGPK(-27.03)	8	3	-2.6573	By MS/MS			65418000	65418000	0	0	0.31734	65418000	0	0	1.1014	0	0
B7Z871;A0A087WZF1;B7ZLW0;Q93052;C9JXK9;C9JUT4	144;285;307;307;144;307	B7Z871	B7Z871	Lipoma-preferred partner	LPP		0.950519	13.6812	8.54515e-06	93.667	87.007	93.667					0	0		NaN	0.950519	13.6812	8.54515e-06	93.667		1	Y	NQGRYYEGYYAAGPGYGGRNDSDPTYGQQGH	X;X;X;X;X;X;X;X;X;X;X;X;X;X;X;B2;X;X;X;X;X;X;X;X;X;X;X;X;X;X;X	XXXXPPPPPPPPPPPPPPPXXXXXXXXXXXX	YYE(0.002)GY(0.003)Y(0.003)AAGPGY(0.951)GGR(0.041)	Y(-38.31)Y(-38.31)E(-26.33)GY(-24.82)Y(-24.82)AAGPGY(13.68)GGR(-13.68)	12	2	-0.84791			By MS/MS	38301000	38301000	0	0	1.3318	0	0	38301000	0	0	3.2534
A0A0S2Z4Z0;Q96PK6;Q59GV2	226;226;160	A0A0S2Z4Z0	A0A0S2Z4Z0	RNA-binding protein 14	RBM14		0.800005	6.02075	8.72341e-06	90.966	71.643	90.966									0.800005	6.02075	8.72341e-06	90.966		1	Y	GRDRSPLRRSPPRASYVAPLTAQPATYRAQP	X;X;X;X;X;X;X;X;X;X;X;X;X;X;X;B2;X;X;X;X;X;X;X;X;X;X;X;X;X;X;X	XXXXXXXXXXXXXPPPPPPPPPPPPPPPXXX	AS(0.2)Y(0.8)VAPLTAQPATYR	AS(-6.02)Y(6.02)VAPLT(-63.88)AQ(-76.62)PAT(-83.53)Y(-87.57)R(-88.9)	3	3	0.18299			By MS/MS	27307000	27307000	0	0	1.2324	0	0	27307000	0	0	3.457
Q6IAX2;Q59GK9;P46778;G3V1B3;M0R181	30;33;30;30;30	Q6IAX2	Q6IAX2	60S ribosomal protein L21	RPL21		0.940043	15.4522	8.94692e-06	98.73	83.528	98.73	0.609259	5.97184	0.000469523	66.621	0.940043	15.4522	8.94692e-06	98.73	0.689989	6.92092	0.000276288	73.841		1	Y	FSRPFRKHGVVPLATYMRIYKKGDIVDIKGM	X;X;X;X;X;X;X;X;X;X;X;X;X;X;X;B2;X;X;X;X;X;X;X;X;X;X;X;X;X;X;X	XXXXXXXPPPPPPPPPPPXXXXXXXXXXXXX	HGVVPLAT(0.027)Y(0.94)M(0.027)R(0.006)	H(-89.98)GVVPLAT(-15.45)Y(15.45)M(-15.45)R(-21.68)	9	3	-0.1051	By MS/MS	By MS/MS	By MS/MS	303970000	303970000	0	0	3.904	78254000	106800000	118920000	3.3914	3.7496	4.521
A0A024R904;Q9HB71;Q6NVY0	199;199;199	A0A024R904	A0A024R904	Calcyclin-binding protein	CACYBP		0.998528	30.6617	9.1266e-06	102.61	88.047	58.433	0.950297	14.2097	0.00195183	50.149	0.998528	30.6617	9.1266e-06	102.61	0.969956	16.181	0.00644029	47.603		1	Y	ETDPSEGLMNVLKKIYEDGDDDMKRTINKAW	X;X;X;X;X;X;X;X;X;X;X;X;X;X;X;B2;X;X;X;X;X;X;X;X;X;X;X;X;X;X;X	XXXXXXXXXXXXXXPPPPPPPPPPPXXXXXX	IY(0.999)E(0.001)D(0.001)GDDDMK	IY(30.66)E(-30.66)D(-32.77)GD(-42.21)D(-48.2)D(-51.04)M(-55.6)K(-58.43)	2	2	-0.21084	By MS/MS	By MS/MS	By MS/MS	306130000	306130000	0	0	0.96054	42212000	43528000	37033000	0.70304	0.33205	0.29028
Q6PKC2;Q86Y74;A8K3C5;J3KPP4;O95232;B4DJ96;D6RDI2;D6RHH0;U3KQT3	88;88;88;88;88;12;137;12;12	Q6PKC2	Q6PKC2	Luc7-like protein 3	CROP;LUC7L3		0.999988	49.2718	9.16161e-06	102.06	51.16	102.06	0.999988	49.2718	9.16161e-06	102.06	0.999958	44.5622	0.000143768	86.898	0.99651	25.3898	0.000659859	67.726		1	Y	SSRFMKVGYERDFLRYLQSLLAEVERRIRRG	X;X;X;X;X;X;X;X;X;X;X;X;X;X;X;B2;X;X;X;X;X;X;X;X;X;X;X;X;X;X;X	XXXXXXXXXXXXXXXPPPPPPPPPPPXXXXX	Y(1)LQSLLAEVER	Y(49.27)LQ(-49.27)S(-66.52)LLAE(-90.9)VE(-97.45)R(-102.06)	1	2	0.52564	By MS/MS	By MS/MS	By MS/MS	156230000	156230000	0	0	2.3601	47986000	35807000	40971000	1.2719	1.2577	NaN
B4E1L0;A0A024R5Q7;P30520	215;236;236	B4E1L0	B4E1L0	Adenylosuccinate synthetase isozyme 2	ADSS		0.882336	8.81778	9.21033e-06	73.91	55.206	73.91	0.882336	8.81778	9.21033e-06	73.91	0.880966	8.70836	9.80523e-06	72.417	0.840431	7.29461	1.38424e-05	63.894		1	Y	KGYMEKIKPMVRDGVYFLYEALHGPPKRILV	X;X;X;X;X;X;X;X;X;X;X;X;X;X;X;B2;X;X;X;X;X;X;X;X;X;X;X;X;X;X;X	XXXXXXXXXXXXPPPPPPPPPPPPPPPXXXX	D(0.116)GVY(0.882)FLY(0.002)EALHGPPK	D(-8.82)GVY(8.82)FLY(-26.95)E(-43.37)ALH(-57.24)GPPK(-70.39)	4	3	-0.74403	By MS/MS	By MS/MS	By MS/MS	232600000	232600000	0	0	NaN	65973000	90280000	76343000	NaN	NaN	NaN
A0A384MDT2;P55795;B4DFK9;B4DP00;A0A384MEJ3;G8JLB6;P31943;E9PCY7;H0YB39;Q68DG4;H0YBD7;H0YBG7	266;266;221;172;266;266;266;266;141;88;80;22	A0A384MDT2;A0A384MEJ3	A0A384MEJ3	Heterogeneous nuclear ribonucleoprotein H2;Heterogeneous nuclear ribonucleoprotein H;Heterogeneous nuclear ribonucleoprotein H, N-terminally processed	HNRNPH2;HNRNPH1;DKFZp686A15170		0.775821	5.55391	9.24828e-06	103.14	82.278	96.756	0.492241	0	9.24828e-06	103.14	0.76438	5.70581	0.000127656	73.877	0.775821	5.55391	1.77976e-05	96.756		1	Y	DGYGFGSDRFGRDLNYCFSGMSDHRYGDGGS	X;X;X;X;X;X;X;X;X;X;X;X;X;X;X;B2;X;X;X;X;X;X;X;X;X;B2;X;X;X;X;B2	XXXXXXXXXXXXPPPPPPPPPPPPPXXXXXX	D(0.006)LN(0.216)Y(0.776)C(0.002)FSGMSDHR	D(-20.87)LN(-5.55)Y(5.55)C(-26.19)FS(-63.33)GM(-70.63)S(-77.7)D(-77.02)H(-83.88)R(-89.72)	4	3	-1.3517		By MS/MS	By MS/MS	991040000	991040000	0	0	3.1087	0	503940000	487100000	0	4.0764	4.8314
F8VQR7;A0A024RBB5;F8VW96;Q16527	71;71;71;71	F8VQR7	F8VQR7	Cysteine and glycine-rich protein 2	CSRP2		0.999335	31.91	9.29151e-06	93.345	78.828	93.345	0.999335	31.91	9.29151e-06	93.345										1	Y	IYCKSCYGKKYGPKGYGYGQGAGTLNMDRGE	X;X;X;B2;X;X;X;X;X;X;X;X;X;X;X;B2;X;X;X;X;X;X;X;X;X;X;X;X;X;X;X	XXXXXXXXXXXXXXPPPPPPPPPPPPPPPXX	GY(0.999)GY(0.001)GQGAGTLNMDR	GY(31.91)GY(-31.91)GQ(-46.75)GAGT(-78.47)LN(-86.31)M(-90.02)D(-89.81)R(-93.35)	2	2	0.76232	By MS/MS			19249000	19249000	0	0	1.958	19249000	0	0	7.3492	0	0
Q5U086;A0A024R625;P60510;Q8WZ56;Q5U0I7;B3KRM2;A0A140VJS0;P62714;B3KQ51;E5RHC1;E5RFI3;E5RHP4;E7ESG8;H3BV22;H3BTA2;B3KUN1;P67775;Q6I9T8	124;124;124;127;127;127;127;127;62;80;62;62;114;90;90;127;127;127	Q5U086;Q8WZ56;B3KUN1	B3KUN1	Serine/threonine-protein phosphatase;Serine/threonine-protein phosphatase 4 catalytic subunit;Serine/threonine-protein phosphatase 2A catalytic subunit beta isoform;Serine/threonine-protein phosphatase 2A catalytic subunit alpha isoform	PPP4C;PPP2CB;PPP2CA		0.953795	13.5865	9.35602e-06	101.48	86.331	101.48	0	0		NaN	0.790446	6.10467	0.000124574	86.344	0.953795	13.5865	9.35602e-06	101.48		1	Y	TILRGNHESRQITQVYGFYDECLRKYGNANV;TLIRGNHESRQITQVYGFYDECLRKYGSVTV	X;X;X;X;X;X;X;X;X;X;X;X;X;X;X;B2;X;X;X;X;X;X;X;X;X;X;X;X;X;X;X	XXXXXXXXXXPPPPPPPPPPPPPPXXXXXXX	QITQ(0.002)VY(0.954)GFY(0.042)D(0.002)ECLR	Q(-44.13)IT(-34.89)Q(-26.54)VY(13.59)GFY(-13.59)D(-27.06)E(-40)C(-53.92)LR(-70.91)	6	2	-1.2165		By MS/MS	By MS/MS	79865000	79865000	0	0	6.7829	0	36909000	42955000	0	NaN	NaN
A0A0R4J2E8;A8MXP9;P43243;D6REM6;D6R991	202;202;202;202;202	A0A0R4J2E8	A0A0R4J2E8	Matrin-3	MATR3		0.849871	8.08089	9.43718e-06	90.444	73.213	70.488	0.752295	7.89428	9.43718e-06	90.444	0.747074	7.7811	1.56153e-05	82.55	0.849871	8.08089	1.82016e-05	70.488		1	Y	DSFDDRGPSLNPVLDYDHGSRSQESGYYDRM	X;X;X;X;X;X;X;X;X;X;X;X;X;X;X;B2;X;X;X;X;X;X;X;X;X;X;B2;B2;X;X;X	XXXXXXPPPPPPPPPPPPPPPXXXXXXXXXX	GPSLNPVLD(0.014)Y(0.85)D(0.132)H(0.002)GS(0.001)R(0.001)	GPS(-51.36)LN(-37.4)PVLD(-17.8)Y(8.08)D(-8.08)H(-25.41)GS(-31.85)R(-31.22)	10	2	-0.10544	By MS/MS	By MS/MS	By MS/MS	627640000	627640000	0	0	NaN	162950000	180760000	206700000	NaN	NaN	NaN
A0A0S2Z4G7;A0A0S2Z491;P06748;A0A140VJQ2;A4ZU86	67;67;67;67;67	A0A0S2Z4G7	A0A0S2Z4G7	Nucleophosmin	NPM1		0.673631	4.71138	9.48068e-06	54.292	42.499	51.225	0.673631	4.71138	0.000119136	54.292	0	0		NaN	0.424973	1.0398	9.48068e-06	51.539		1	Y	GAKDELHIVEAEAMNYEGSPIKVTLATLKMS	X;X;X;X;X;X;X;X;X;X;X;X;X;X;X;B2;X;X;X;X;X;X;X;X;X;X;X;X;X;X;X	PPPPPPPPPPPPPPPPPPPPPPXXXXXXXXX	DELHIVE(0.002)AE(0.001)AM(0.008)N(0.228)Y(0.674)E(0.06)GS(0.021)PIK(0.007)	D(-36.71)E(-36.71)LH(-37.03)IVE(-25.35)AE(-28.05)AM(-19.48)N(-4.71)Y(4.71)E(-10.48)GS(-15.1)PIK(-20.11)	13	3	-1.5794	By MS/MS			411450000	411450000	0	0	0.30137	411450000	0	0	0.77031	0	0
A0A140VJZ1;P45974	325;325	A0A140VJZ1	A0A140VJZ1	Ubiquitin carboxyl-terminal hydrolase 5	USP5		0.665709	5.7592	9.53616e-06	64.68	46.948	64.68					0.665709	5.7592	9.53616e-06	64.68						1	Y	IQESGVPLKPLFGPGYTGIRNLGNSCYLNSV	X;X;X;X;X;X;X;X;X;X;X;X;X;X;X;B2;X;X;X;X;X;X;X;X;X;X;X;X;X;X;X	PPPPPPPPPPPPPPPPPPPPXXXXXXXXXXX	IGEWELIQESGVPLKPLFGPGY(0.666)T(0.157)GIR(0.177)	IGE(-63.96)W(-63.58)E(-62.05)LIQ(-49.21)E(-49.21)S(-49.21)GVPLK(-40.33)PLFGPGY(5.76)T(-6.26)GIR(-5.76)	22	3	-1.2698		By MS/MS		83756000	83756000	0	0	0.80865	0	83756000	0	0	1.9468	0
A0A384P5Q0;P04040;B4DWK8;Q8TAK2	379;379;319;80	A0A384P5Q0	A0A384P5Q0	Catalase	CAT		0.765937	5.18518	9.67532e-06	74.537	57.17	74.537					0.765937	5.18518	9.67532e-06	74.537						1	Y	HRLGPNYLHIPVNCPYRARVANYQRDGPMCM	X;X;X;X;X;X;X;X;X;X;X;X;X;X;X;B2;X;X;X;X;X;X;X;X;X;X;X;X;X;X;X	XXPPPPPPPPPPPPPPPXXXXXXXXXXXXXX	LGPNYLHIPVNC(0.002)PY(0.766)R(0.232)	LGPN(-72.47)Y(-72.47)LH(-67.31)IPVN(-32.24)C(-27.07)PY(5.19)R(-5.19)	14	3	-0.15311		By MS/MS		118540000	118540000	0	0	NaN	0	118540000	0	NaN	NaN	NaN
Q9NZI8;D3DTW3	321;185	Q9NZI8	Q9NZI8	Insulin-like growth factor 2 mRNA-binding protein 1	IGF2BP1		0.916536	13.0076	9.82221e-06	65.563	41.227	65.563	0.856055	8.93718	0.000214679	56.225					0.916536	13.0076	9.82221e-06	65.563		1	Y	TETKITISSLQDLTLYNPERTITVKGAIENC	X;X;X;X;X;X;X;X;X;X;X;X;X;X;X;B2;X;X;X;X;X;X;X;X;X;X;X;X;X;X;X	XXXXPPPPPPPPPPPPPPPPXXXXXXXXXXX	ITISSLQD(0.001)LT(0.027)LY(0.917)N(0.046)PE(0.009)R(0.001)	IT(-49.43)IS(-42.84)S(-42.84)LQ(-36.02)D(-29.89)LT(-15.36)LY(13.01)N(-13.01)PE(-20.31)R(-29.28)	12	2	-0.16059	By MS/MS		By MS/MS	49478000	49478000	0	0	NaN	24375000	0	25103000	NaN	NaN	NaN
Q59EH3;P24666;G5E9R5;A0A140VK37	65;58;58;58	Q59EH3	Q59EH3	Low molecular weight phosphotyrosine protein phosphatase	ACP1		0.690196	6.00296	1.0006e-05	84.169	73.559	46.069					0.690196	6.00296	0.000781941	46.069	0.443302	0	1.0006e-05	84.169		1	Y	DSAATSGYEIGNPPDYRGQSCMKRHGIPMSH	X;X;X;X;X;X;X;X;X;X;X;X;X;X;X;B2;X;X;X;X;X;X;X;X;X;X;X;X;X;X;X	PPPPPPPPPPPPPPPPPXXXXXXXXXXXXXX	VDSAATSGYEIGN(0.001)PPD(0.136)Y(0.69)R(0.173)	VD(-44.88)S(-44.16)AAT(-41.92)S(-41.92)GY(-41.92)E(-41.92)IGN(-30.52)PPD(-7.06)Y(6)R(-6)	17	2	-0.78583		By MS/MS		52963000	52963000	0	0	0.56238	0	52963000	0	0	1.4316	0
A8K5T7;Q9Y2Z0;A8K7W3;B4DYC6	317;317;285;229	A8K5T7	A8K5T7	Suppressor of G2 allele of SKP1 homolog	SUGT1		0.924443	11.663	1.01337e-05	89.359	79.79	89.359	0.643092	5.89751	1.51219e-05	87.083	0.924443	11.663	1.17686e-05	89.359	0.836994	10.0993	1.01337e-05	73.266		1	Y	KLEGDAALNRLFQQIYSDGSDEVKRAMNKSF	X;X;X;X;X;X;X;X;X;X;X;X;X;X;X;B2;X;X;X;X;X;X;X;X;X;X;X;X;X;X;X	XXXXXXXXXXPPPPPPPPPPPPPPPXXXXXX	LFQ(0.003)Q(0.009)IY(0.924)S(0.063)D(0.001)GSDEVKR	LFQ(-25.57)Q(-20.16)IY(11.66)S(-11.66)D(-29.59)GS(-49.61)D(-48.13)E(-53.55)VK(-64.94)R(-70.07)	6	3	0.04852	By MS/MS	By MS/MS	By MS/MS	459230000	459230000	0	0	25.026	125590000	128910000	121380000	28.036	19.376	16.819
P17987;E7EQR6;F5H282	545;390;321	P17987	P17987	T-complex protein 1 subunit alpha	TCP1		0.690896	6.94042	1.02385e-05	77.533	60.901	60.064	0.224745	0	0.00187583	40.477	0.690896	6.94042	1.02385e-05	71.502	0.44686	0	1.28943e-05	77.533		1	Y	LIKLHPESKDDKHGSYEDAVHSGALND____	X;X;X;X;X;X;X;X;X;X;X;X;X;X;X;B2;X;X;X;X;X;X;X;X;X;X;X;X;X;X;X	XXXXXXXXXXXXPPPPPPPPPPPPPPPXXXX	H(0.07)GS(0.07)Y(0.691)E(0.14)D(0.03)AVHSGALND	H(-9.96)GS(-9.96)Y(6.94)E(-6.94)D(-13.66)AVH(-52.34)S(-52.34)GALN(-52.34)D(-52.34)	4	2	0.004437		By MS/MS		69899000	69899000	0	0	0.44027	0	69899000	0	0	1.372	0
Q6IAX2;Q59GK9;P46778;G3V1B3;M0R181	65;68;65;65;65	Q6IAX2	Q6IAX2	60S ribosomal protein L21	RPL21		0.971368	15.6437	1.02529e-05	75.316	65.626	75.316	0.961068	14.3315	1.28169e-05	66.059	0.955417	15.2799	1.13001e-05	69.261	0.971368	15.6437	1.02529e-05	75.316		1	Y	KGMPHKCYHGKTGRVYNVTQHAVGIVVNKQV	X;X;X;X;X;X;X;X;X;X;X;X;X;X;X;B2;X;X;X;X;X;X;X;X;X;X;X;X;X;X;X	XXXXXXXXXXXXXXPPPPPPPPPPPPPPPXX	VY(0.971)N(0.026)VT(0.001)QHAVGIVVNK	VY(15.64)N(-15.64)VT(-28.43)Q(-33.77)H(-34.51)AVGIVVN(-75.12)K(-75.32)	2	3	-0.0098068	By MS/MS	By MS/MS	By MS/MS	535760000	535760000	0	0	2.8511	138870000	197230000	199660000	2.1862	3.3631	3.0366
A8KAK1;Q9NYU2	647;671	A8KAK1	A8KAK1	UDP-glucose:glycoprotein glucosyltransferase 1	UGGT1		0.556395	7.98535	1.05081e-05	58.015	47.685	58.015					0.508211	7.14385	6.18952e-05	49.25	0.556395	7.98535	1.05081e-05	58.015		1	Y	MHKILETTTFFQRAVYLGELPHDQDVVEYIM	X;X;X;X;X;X;X;X;X;X;X;X;X;X;X;B2;X;X;X;X;X;X;X;X;X;X;X;X;X;X;X	XXXXXXXXXXXXXPPPPPPPPPPPPPPPPPP	AVY(0.556)LGE(0.088)LPH(0.088)D(0.088)Q(0.088)D(0.088)VVE(0.001)YIMNQPNVVPR	AVY(7.99)LGE(-7.99)LPH(-7.99)D(-7.99)Q(-7.99)D(-7.99)VVE(-27.71)Y(-33.86)IM(-44.13)N(-50.73)Q(-54.95)PN(-56.89)VVPR(-58.01)	3	3	2.9106		By MS/MS	By MS/MS	101570000	101570000	0	0	NaN	0	47105000	54469000	NaN	NaN	NaN
B4DLR3;Q00839;B3KX72;Q96BA7;A0A1W2PP35;A0A1W2PPS1;Q5RI18;A0A1W2PRI6	216;257;182;154;166;238;34;39	B4DLR3	B4DLR3	Heterogeneous nuclear ribonucleoprotein U	HNRNPU		0.999724	36.5402	1.12778e-05	94.85	71.796	67.726	0.999234	31.2907	4.16595e-05	90.64	0.99731	25.8939	0.000352032	78.149	0.999724	36.5402	1.12778e-05	94.85		1	Y	KKRGVKRPREDHGRGYFEYIEENKYSRAKSP	X;X;X;X;X;X;X;X;X;X;X;X;X;X;X;B2;X;X;X;X;X;X;X;X;X;X;X;X;X;X;X	XXXXXXXXXXXXXXPPPPPPPPPPXXXXXXX	GY(1)FEYIEENK	GY(36.54)FE(-36.54)Y(-42.87)IE(-58.54)E(-61.62)N(-66.83)K(-67.73)	2	3	-1.9686	By MS/MS	By MS/MS	By MS/MS	845970000	845970000	0	0	1.5057	204300000	280680000	274110000	1.5466	1.4755	1.1445
A0A0S2Z4Q3;A0A0S2Z4K2;P62633;A0A0S2Z4P7	48;55;55;55	A0A0S2Z4Q3	A0A0S2Z4Q3	Cellular nucleic acid-binding protein	CNBP		0.812016	7.00321	1.18126e-05	88.706	68.419	88.706	0	0		NaN	0.812016	7.00321	1.18126e-05	88.706	0	0		NaN		1	Y	GRGFQFVSSSLPDICYRCGESGHLAKDCDLQ	X;X;X;X;X;X;X;X;X;X;X;X;X;X;X;B2;X;X;X;X;X;X;X;X;X;X;X;X;X;X;X	XXPPPPPPPPPPPPPPPXXXXXXXXXXXXXX	GFQFVSSSLPDIC(0.026)Y(0.812)R(0.162)	GFQ(-65.31)FVS(-57.74)S(-59.37)S(-55.41)LPD(-34.21)IC(-14.98)Y(7)R(-7)	14	3	-0.60985		By MS/MS	By matching	396920000	396920000	0	0	1.1617	0	182220000	214700000	0	2.0039	2.7434
Q15645;H0YAL2	206;202	Q15645	Q15645	Pachytene checkpoint protein 2 homolog	TRIP13		0.971396	15.3134	1.26614e-05	66.387	54.854	62.861	0.79927	6.04273	0.00126753	42.818	0.971396	15.3134	1.51054e-05	62.861	0.96789	14.7956	1.26614e-05	66.387		1	Y	ALAQKLTIRLSSRYRYGQLIEINSHSLFSKW	X;X;X;X;X;X;X;X;X;X;X;X;X;X;X;B2;X;X;X;X;X;X;X;X;X;X;X;X;X;X;X	XXXXXXXXXXXXXXXPPPPPPPPPPPPPPPX	Y(0.971)GQ(0.029)LIEINSHSLFSK	Y(15.31)GQ(-15.31)LIE(-48.2)IN(-54.37)S(-56.74)H(-56.44)S(-59.63)LFS(-62.85)K(-62.86)	1	3	-0.39187	By MS/MS	By MS/MS	By MS/MS	107060000	107060000	0	0	NaN	29400000	26500000	51159000	NaN	NaN	NaN
Q6FHJ5;O14828	53;53	Q6FHJ5	Q6FHJ5	Secretory carrier-associated membrane protein 3	SCAMP3		0.74369	5.63896	1.2706e-05	52.97	39.2	52.97	0.655315	4.37445	0.000100244	47.105					0.74369	5.63896	1.2706e-05	52.97		1	Y	LDVYNPFETREPPPAYEPPAPAPLPPPSAPS	X;X;X;X;X;X;X;X;X;X;X;X;X;X;X;B2;X;X;X;X;X;X;X;X;X;X;X;X;X;X;X	XXXXXXXXXXPPPPPPPPPPPPPPPPPPPPP	E(0.203)PPPAY(0.744)E(0.053)PPAPAPLPPPSAPSLQPSR	E(-5.64)PPPAY(5.64)E(-11.46)PPAPAPLPPPS(-37.22)APS(-48.67)LQ(-50.89)PS(-50.83)R(-50.8)	6	3	-1.0787	By MS/MS		By MS/MS	54831000	54831000	0	0	NaN	24037000	0	30794000	NaN	NaN	NaN
Q53TX0;A8K132;O94925;H7BZD1;B3KM58	293;293;293;58;69	Q53TX0	Q53TX0	Glutaminase kidney isoform, mitochondrial	GLS		0.996813	26.3791	1.3141e-05	65.374	28.789	65.374	0.996813	26.3791	1.3141e-05	65.374	0	0		NaN	0.867637	11.2843	1.3141e-05	65.374		1	Y	TKVPFCLQSCVKPLKYAIAVNDLGTEYVHRY	X;X;X;X;X;X;X;X;X;X;X;X;X;X;X;B2;X;X;X;X;X;X;X;X;X;X;X;X;X;X;X	XXXXXXXXXXXXXXXPPPPPPPPPPPPPPPX	Y(0.997)AIAVN(0.002)D(0.001)LGTEYVHR	Y(26.38)AIAVN(-26.38)D(-32.11)LGT(-38.55)E(-42.46)Y(-42.46)VH(-47.05)R(-51.2)	1	3	-0.29881	By MS/MS	By matching	By MS/MS	97731000	97731000	0	0	NaN	34343000	21351000	42037000	NaN	NaN	NaN
Q53XX5;Q14011	167;167	Q53XX5	Q53XX5	Cold-inducible RNA-binding protein	CIRBP		0.99187	21.0392	1.31558e-05	99.855	95.243	99.855	0.93354	11.6744	1.31558e-05	99.855	0.982909	19.8107	0.000124549	88.267	0.99187	21.0392	1.31558e-05	99.855		1	Y	SDRSSGGSYRDSYDSYATHNE__________	B2;X;X;X;X;X;X;X;X;X;X;X;X;X;X;B2;X;X;X;X;X;X;X;X;X;X;X;X;X;X;X	XXXXXXXXXXPPPPPPPPPPPXXXXXXXXXX	DSYDS(0.008)Y(0.992)ATHNE	D(-64.7)S(-64.7)Y(-55.14)D(-40.94)S(-21.04)Y(21.04)AT(-36.46)H(-49.02)N(-60.85)E(-59.35)	6	2	0.25483	By MS/MS	By MS/MS	By MS/MS	503630000	503630000	0	0	2.1914	178160000	201640000	123830000	2.8615	2.2739	1.5697
H0YDR3;Q8N5M4	56;158	H0YDR3	H0YDR3	Tetratricopeptide repeat protein 9C	TTC9C		0.622807	4.56755	1.32849e-05	95.428	78.147	95.428	0	0		NaN	0.622807	4.56755	1.32849e-05	95.428	0	0		NaN		1	Y	NVRRYLQLTQSELSSYHRKEKQLYLGMFG__	X;X;X;X;X;X;X;X;X;X;X;X;X;X;X;B2;X;X;X;X;X;X;X;X;X;X;X;X;X;X;X	XXXXPPPPPPPPPPPPPPXXXXXXXXXXXXX	YLQLTQSELS(0.004)S(0.115)Y(0.623)H(0.218)R(0.04)	Y(-91.11)LQ(-88.37)LT(-75.67)Q(-64.86)S(-59.14)E(-46.96)LS(-21.55)S(-7.34)Y(4.57)H(-4.57)R(-11.9)	12	3	-0.19686		By MS/MS		87389000	87389000	0	0	NaN	0	87389000	0	NaN	NaN	NaN
P46109	92	P46109	P46109	Crk-like protein	CRKL		0.890316	9.28159	1.33002e-05	79.81	64.609	79.81	0.890316	9.28159	1.35845e-05	79.81	0.812804	6.86314	0.000646283	48.405	0.82876	7.25081	1.33002e-05	65.038		1	Y	EFDHLPALLEFYKIHYLDTTTLIEPAPRYPS	X;X;X;X;X;X;X;X;X;X;X;X;X;X;X;B2;X;X;X;X;X;X;X;X;X;X;X;X;X;X;X	XXXXXXXXXXXXXPPPPPPPPPPPPPPPXXX	IH(0.105)Y(0.89)LD(0.004)T(0.001)TTLIEPAPR	IH(-9.28)Y(9.28)LD(-23.92)T(-30.33)T(-37.24)T(-43.92)LIE(-64.97)PAPR(-77.74)	3	3	-0.77269	By MS/MS	By MS/MS	By MS/MS	284360000	284360000	0	0	24.876	83316000	68613000	109120000	NaN	10.607	21.989
P46109	48	P46109	P46109	Crk-like protein	CRKL		0.769333	7.86426	1.35787e-05	78.486	67.322	78.486	0	0		NaN	0.366106	0	0.000730992	59.227	0.769333	7.86426	1.35787e-05	78.486		1	Y	HGMFLVRDSSTCPGDYVLSVSENSRVSHYII	X;X;X;X;X;X;X;X;X;X;X;X;X;X;X;B2;X;X;X;X;X;X;X;X;X;X;X;X;X;X;X	XXXXXXXPPPPPPPPPPPPPPPPPPXXXXXX	D(0.004)S(0.004)S(0.032)T(0.032)C(0.032)PGD(0.126)Y(0.769)VLSVSENSR	D(-22.36)S(-22.36)S(-13.84)T(-13.84)C(-13.84)PGD(-7.86)Y(7.86)VLS(-32.01)VS(-45.86)E(-59.27)N(-64.77)S(-64.13)R(-65.35)	9	2	-2.7482			By MS/MS	20211000	20211000	0	0	0.48323	0	0	20211000	0	0	1.2759
K7ENV7;K7EKW4;Q96AB3	33;33;33	K7ENV7	K7ENV7	Isochorismatase domain-containing protein 2, mitochondrial	ISOC2		0.830075	9.90176	1.37275e-05	64.136	50.201	64.136	0.79761	8.97034	0.000739504	53.777	0.830075	9.90176	1.37275e-05	64.136	0.81481	9.47913	0.00022945	52.887		1	Y	LFLCDMQEKFRHNIAYFPQIVSVAARMLKVA	X;X;X;X;X;X;X;X;X;X;X;X;X;X;X;B2;X;X;X;X;X;X;X;X;X;X;X;X;X;X;X	XXXXXXXXXXXPPPPPPPPPPPPPPPXXXXX	H(0.085)N(0.085)IAY(0.83)FPQIVSVAAR	H(-9.9)N(-9.9)IAY(9.9)FPQ(-38.82)IVS(-57.07)VAAR(-58.23)	5	3	-0.11779	By matching	By MS/MS	By MS/MS	44640000	44640000	0	0	NaN	10072000	16381000	18187000	NaN	NaN	NaN
A0A024R4F1;P06733;A0A2R8Y6G6;K7EM90;A0A2R8YEM5;A0A2R8Y879;K7ERS8;A0A2R8Y798;A0A2R8YEG5;E5RI09;E5RG95;K7EPM1;K7EKN2;E5RGZ4;B4DUJ6;Q6FHV6;P09104;F5H0C8;A8K3B0;F5H1C3;P13929	44;44;44;44;44;44;44;44;44;44;44;44;44;44;44;44;44;44;44;44;44	A0A024R4F1;Q6FHV6;P13929	A0A024R4F1	Alpha-enolase;Enolase;Gamma-enolase;Beta-enolase	ENO1;ENO3;ENO2		0.862354	8.75333	1.38014e-05	73.809	47.871	60.628	0.729574	6.22291	0.000484574	45.608	0.862354	8.75333	0.000104662	60.628	0.822876	7.02986	1.38014e-05	73.809		1	Y	GLFRAAVPSGASTGIYEALELRDGDKQRYLG;GLFRAAVPSGASTGIYEALELRDNDKTRYMG;GRFRAAVPSGASTGIYEALELRDGDKGRYLG	X;X;X;X;X;X;X;X;X;X;X;X;X;X;X;B2;X;X;X;X;X;X;X;X;X;X;X;X;X;X;X	XXXXPPPPPPPPPPPPPPPPPPXXXXXXXXX	AAVPS(0.001)GAS(0.002)T(0.016)GIY(0.862)E(0.115)ALE(0.003)LR	AAVPS(-30.57)GAS(-25.42)T(-17.25)GIY(8.75)E(-8.75)ALE(-24.34)LR(-40.53)	12	2	-1.5674	By MS/MS	By matching	By MS/MS	704180000	704180000	0	0	0.81869	31810000	7342300	249520000	0.16049	0.022799	0.73415
O14737;K7EQA1;Q59GR9	73;35;34	O14737	O14737	Programmed cell death protein 5	PDCD5		0.722375	4.34299	1.39044e-05	99.442	67.328	99.442	0	0		NaN	0.722375	4.34299	1.39044e-05	99.442						1	Y	NLALVKPEKTKAVENYLIQMARYGQLSEKVS	X;X;X;X;X;X;X;X;X;X;X;X;X;X;X;B2;X;X;X;X;X;X;B2;X;X;X;X;X;X;X;X	XXXXXXXXXXXPPPPPPPPPPPXXXXXXXXX	AVE(0.012)N(0.266)Y(0.722)LIQMAR	AVE(-17.85)N(-4.34)Y(4.34)LIQ(-45.47)M(-56.84)AR(-81)	5	2	-0.02596	By matching	By MS/MS		710280000	710280000	0	0	NaN	349450000	360830000	0	NaN	NaN	NaN
B4DTA2;A0A087WUK2;A0A024RDB5;O14979;B4DGN3	132;281;281;281;16	B4DTA2	B4DTA2	Heterogeneous nuclear ribonucleoprotein D-like	HNRNPDL		0.777675	5.97109	1.42417e-05	65.219	50.246	65.219									0.777675	5.97109	1.42417e-05	65.219		1	Y	MDTKTNERRGFCFITYTDEEPVKKLLESRYH	X;X;X;X;X;X;X;X;X;X;X;X;X;X;X;B2;X;X;X;X;X;X;X;X;X;X;X;X;X;B2;X	XXXXXXXXXPPPPPPPPPPPPPPPXXXXXXX	GFC(0.009)FIT(0.197)Y(0.778)T(0.008)D(0.008)E(0.001)EPVKK	GFC(-19.23)FIT(-5.97)Y(5.97)T(-20.01)D(-20.01)E(-29.87)E(-42.08)PVK(-48.55)K(-48.28)	7	3	-2.3231			By MS/MS	153300000	153300000	0	0	0.56484	0	0	153300000	0	0	1.9414
O43324	152	O43324	O43324	Eukaryotic translation elongation factor 1 epsilon-1	EEF1E1		0.995895	24.6239	1.45625e-05	97.472	82.807	97.472	0.787445	5.85464	0.00107547	51.162	0	0		NaN	0.995895	24.6239	1.45625e-05	97.472		1	Y	EKYLNVSRWFCHIQHYPGIRQHLSSVVFIKN	X;X;X;X;X;X;X;X;X;X;X;X;X;X;X;B2;X;X;X;X;X;X;X;X;X;X;X;X;X;X;X	XXXXXXXXPPPPPPPPPPPPXXXXXXXXXXX	WFCHIQH(0.003)Y(0.996)PGIR(0.001)	W(-91.59)FC(-83.7)H(-78.66)IQ(-47.02)H(-24.62)Y(24.62)PGIR(-31.84)	8	3	0.21547	By MS/MS	By matching	By MS/MS	205930000	205930000	0	0	1.7119	16253000	32159000	32225000	0.52434	0.71424	0.7278
Q6FGX9;Q53EY8;Q5T9B7;P00568	32;32;48;32	Q6FGX9	Q6FGX9	Adenylate kinase isoenzyme 1	AK1		0.99411	22.4781	1.48857e-05	98.368	73.549	98.368	0.99411	22.4781	1.48857e-05	98.368	0	0		NaN	0.879799	10.2621	0.000838875	51.092		1	Y	PGSGKGTQCEKIVQKYGYTHLSTGDLLRSEV	X;X;X;X;X;X;X;X;X;X;X;X;X;X;X;B2;X;X;X;X;X;X;X;X;X;X;X;X;X;X;X	XXXXXXXXXXXXXXXPPPPPPPPPPPPPXXX	Y(0.994)GY(0.006)THLSTGDLLR	Y(22.48)GY(-22.48)T(-35.64)H(-66.71)LS(-88.98)T(-90.94)GD(-93.67)LLR(-96.85)	1	3	-0.27589	By MS/MS		By MS/MS	105550000	105550000	0	0	NaN	38977000	0	66572000	NaN	NaN	NaN
V9HW65;A0A024R5Z7;P07355;H0YN42;H0YMD0;H0YMU9;A6NMY6;H0YKS4;B4DNH8;H0YMM1;H0YKZ7;H0YLV6;H0YMT9;H0YKX9;H0YMW4;H0YKL9;H0YKV8;H0YMD9;H0YNB8;H0YKN4	24;24;24;24;24;24;24;24;24;24;24;24;24;24;52;24;24;24;24;24	V9HW65	V9HW65	Annexin;Annexin A2;Putative annexin A2-like protein	HEL-S-270;ANXA2;ANXA2P2		0.646606	4.88173	1.5353e-05	77.644	77.644	40.186	0.509779	3.1839	1.5353e-05	77.644	0.646606	4.88173	0.00109661	40.186	0.546446	3.25227	9.63394e-05	56.817		1	Y	CKLSLEGDHSTPPSAYGSVKAYTNFDAERDA	X;X;X;X;X;X;X;X;X;X;X;X;X;X;X;B2;X;X;X;X;X;B2;X;X;X;X;X;X;X;X;X	XXPPPPPPPPPPPPPPPPPPXXXXXXXXXXX	LSLEGDHST(0.001)PPS(0.071)AY(0.647)GS(0.21)VK(0.071)	LS(-39.34)LE(-37.41)GD(-37.41)H(-37.51)S(-35.28)T(-30.19)PPS(-9.59)AY(4.88)GS(-4.88)VK(-9.59)	14	3	-0.22712	By MS/MS	By MS/MS	By MS/MS	3492300000	3492300000	0	0	11.964	0	1407500000	1594000000	0	15.413	16.757
A0A024R3W7;P24534;C9JZW3;F2Z2G2;F8WF65	18;18;18;18;18	A0A024R3W7	A0A024R3W7	Elongation factor 1-beta	EEF1B2		0.932203	14.2461	1.56003e-05	82.529	63.799	82.529	0	0		NaN	0.85973	11.3832	0.000124004	57.794	0.932203	14.2461	1.56003e-05	82.529		1	Y	FGDLKSPAGLQVLNDYLADKSYIEGYVPSQA	X;X;X;X;X;X;X;X;X;X;X;X;X;X;X;B2;X;X;X;X;X;X;X;B2;X;X;X;X;X;X;X	XXXXXPPPPPPPPPPPPPPPXXXXXXXXXXX	SPAGLQVLN(0.002)D(0.035)Y(0.932)LAD(0.014)K(0.017)	S(-75.8)PAGLQ(-54.44)VLN(-27.72)D(-14.25)Y(14.25)LAD(-18.29)K(-17.31)	11	3	1.2395	By matching	By MS/MS	By MS/MS	141910000	141910000	0	0	0.14861	45411000	58114000	38385000	0.13859	0.19589	0.11611
B3KN05;B2RBE0;A0A024R487;O95573;B3KMA6	340;351;351;351;96	B3KN05	B3KN05	Long-chain-fatty-acid--CoA ligase 3	ACSL3		0.983348	18.3885	1.56735e-05	85.845	67.809	85.845	0.848809	8.80663	0.000757087	50.207	0.983348	18.3885	2.67005e-05	85.845	0.86544	8.99165	1.56735e-05	73.632		1	Y	LSAELVCLSHGCRIGYSSPQTLADQSSKIKK	X;X;X;X;X;X;X;X;X;X;X;X;X;X;X;B2;X;X;X;X;X;X;X;X;X;X;X;X;X;X;X	XXXXXXXXXXXXXPPPPPPPPPPPPPPPXXX	IGY(0.983)S(0.014)S(0.002)PQTLADQSSK	IGY(18.39)S(-18.39)S(-26.28)PQ(-41.55)T(-48.66)LAD(-66.71)Q(-80)S(-83.71)S(-85.74)K(-85.84)	3	2	0.28679	By MS/MS	By MS/MS	By MS/MS	50039000	50039000	0	0	NaN	14203000	16423000	19414000	NaN	NaN	NaN
C7DJS2	56	C7DJS2	C7DJS2		GSTP1		0.628178	5.37874	1.56791e-05	99.788	60.64	99.788	0.246284	0	5.53556e-05	64.121	0.628178	5.37874	1.56791e-05	99.788	0.241127	0	1.77072e-05	73.464		1	Y	VEDLRCKYVSLIYTNYEAGKDDYVKALPGQL	X;X;X;X;X;X;X;X;X;X;X;X;X;X;X;B2;X;X;X;X;X;X;X;X;X;X;X;X;X;B2;X	XXXXXXXPPPPPPPPPPPPPPPPPPXXXXXX	YVSLIYT(0.006)N(0.182)Y(0.628)E(0.049)AGK(0.135)	Y(-91.79)VS(-83.14)LIY(-34.63)T(-20.3)N(-5.38)Y(5.38)E(-11.11)AGK(-6.68)	9	2	-0.55233		By MS/MS		105770000	105770000	0	0	0.14106	0	105770000	0	0	0.27524	0
A0A024RB14;P62854;Q75MH1	62;62;62	A0A024RB14	A0A024RB14	40S ribosomal protein S26	RPS26		0.925069	13.0115	1.59189e-05	79.201	37.549	79.201	0.925069	13.0115	2.23014e-05	79.201	0.917548	13.466	1.6909e-05	72.096	0.909855	12.9841	1.59189e-05	73.327		1	Y	AAAVRDISEASVFDAYVLPKLYVKLHYCVSC	X;X;X;X;X;X;X;X;X;X;X;X;X;X;X;B2;X;X;X;X;X;X;X;X;X;X;B2;B2;X;X;X	XXXXXPPPPPPPPPPPPPPPXXXXXXXXXXX	DISEASVFD(0.029)AY(0.925)VLPK(0.046)	D(-74.31)IS(-65.39)E(-57.17)AS(-40.16)VFD(-15.1)AY(13.01)VLPK(-13.01)	11	2	1.3446	By MS/MS	By MS/MS	By MS/MS	961690000	961690000	0	0	5.0239	210310000	295330000	456050000	3.9151	5.2464	5.6016
B2R6E5;A8K3B4;Q59ED7;H0Y4R2;P16435;Q63HL4;B4DJI8;E7EMD0;B4DDH3;B4E305;B4DKM8	390;390;396;441;387;390;289;128;128;289;198	B2R6E5	B2R6E5	NADPH--cytochrome P450 reductase	POR;DKFZp686G04235		0.775112	6.93222	1.59714e-05	80.98	68.784	80.98					0.775112	6.93222	1.59714e-05	80.98	0	0		NaN		1	Y	TYYLDITNPPRTNVLYELAQYASEPSEQELL	X;X;X;X;X;X;X;X;X;X;X;X;X;X;X;B2;X;X;X;X;X;X;X;X;X;X;X;X;X;X;X	XXXXXXXXXXXPPPPPPPPPPPPPPPPPPPP	T(0.033)N(0.033)VLY(0.775)E(0.157)LAQ(0.002)YASEPSEQELLR	T(-13.73)N(-13.73)VLY(6.93)E(-6.93)LAQ(-26.75)Y(-32.36)AS(-45.15)E(-56.75)PS(-70.65)E(-70.65)Q(-74.13)E(-77)LLR(-78.18)	5	3	0.71678		By MS/MS	By matching	51689000	51689000	0	0	0.19405	0	25912000	25777000	0	0.16912	0.58825
Q9BRS2	83	Q9BRS2	Q9BRS2	Serine/threonine-protein kinase RIO1	RIOK1		0.999931	41.7704	1.60484e-05	97.813	77.51	97.813	0.999931	41.7704	1.60484e-05	97.813	0.999886	39.6321	8.54671e-05	89.827	0.999904	41.2317	0.000131406	81.017		1	Y	DDWDWDEGVGKLAKGYVWNGGSNPQANRQTS	X;X;X;X;X;X;X;X;X;X;X;X;X;X;X;B2;X;X;X;X;X;X;X;X;X;X;X;X;X;X;X	XXXXXXXXXXXXXXPPPPPPPPPPPPPPXXX	GY(1)VWNGGSNPQANR	GY(41.77)VW(-41.77)N(-55.6)GGS(-71.77)N(-79.07)PQ(-85.6)AN(-90.93)R(-95.3)	2	2	0.22413	By MS/MS	By MS/MS	By MS/MS	37664000	37664000	0	0	NaN	11798000	14238000	11628000	NaN	NaN	NaN
A4D1W6;Q8TAP9	103;103	A4D1W6	A4D1W6	M-phase-specific PLK1-interacting protein	C7orf11;MPLKIP		0.579015	3.7596	1.60756e-05	72.338	64.651	72.338	0	0		NaN					0.579015	3.7596	1.60756e-05	72.338		1	Y	GSYSRSPAGSQQQFGYSPGQQQTHPQGSPRT	X;X;X;X;X;X;X;X;X;X;X;X;X;X;X;B2;X;X;X;X;X;X;X;X;X;X;X;X;X;X;X	XXXXXPPPPPPPPPPPPPPPPPPPPPPPPPX	SPAGS(0.002)Q(0.002)Q(0.051)Q(0.07)FGY(0.579)S(0.244)PGQ(0.044)Q(0.006)Q(0.001)THPQGSPR	S(-31.25)PAGS(-24.96)Q(-25.32)Q(-10.54)Q(-9.16)FGY(3.76)S(-3.76)PGQ(-11.15)Q(-19.88)Q(-28.13)T(-31.41)H(-34.63)PQ(-48.62)GS(-53.83)PR(-61.45)	11	3	-0.42798	By matching		By MS/MS	30977000	30977000	0	0	NaN	7626800	0	23350000	NaN	NaN	NaN
V9HW65;A0A024R5Z7;P07355;A6NMY6;B4DNH8	316;316;316;316;171	V9HW65	V9HW65	Annexin;Annexin A2;Putative annexin A2-like protein	HEL-S-270;ANXA2;ANXA2P2		0.949673	14.2882	1.60926e-05	98.233	73.061	66.267	0.533204	1.02426	0.000506609	72.638	0.926217	11.9476	0.000445273	64.64	0.949673	14.2882	1.60926e-05	98.233		1	Y	LKIRSEFKRKYGKSLYYYIQQDTKGDYQKAL	X;X;X;X;X;X;X;X;X;X;X;X;X;X;X;B2;X;X;X;X;X;X;X;X;X;X;X;X;X;X;X	XXXXXXXXXXXXXPPPPPPPPPPPXXXXXXX	S(0.004)LY(0.95)Y(0.035)Y(0.011)IQQDTK	S(-23.79)LY(14.29)Y(-14.29)Y(-19.47)IQ(-36.34)Q(-51.71)D(-51.06)T(-50.38)K(-50.01)	3	3	-1.5518	By MS/MS	By MS/MS	By MS/MS	96543000	96543000	0	0	0.21605	10697000	11197000	12683000	0.087775	0.083041	0.0667
B2R4I8;Q92572;F5H459	23;23;23	B2R4I8	B2R4I8	AP-3 complex subunit sigma-1	AP3S1		0.704988	7.45854	1.62634e-05	85.45	78.235	79.659	0.704988	7.45854	2.28773e-05	79.659	0.429783	0	0.000106646	72.2	0.553609	1.27676	1.62634e-05	85.45		1	Y	FNNHGKPRLSKFYQPYSEDTQQQIIRETFHL	X;X;X;X;X;X;X;X;X;X;X;X;X;X;X;B2;X;X;X;X;X;X;X;X;X;X;X;X;X;X;X	XXXXXXXXXXXPPPPPPPPPPPPPPPXXXXX	FY(0.013)Q(0.127)PY(0.705)S(0.127)E(0.023)D(0.004)T(0.001)QQQIIR	FY(-17.19)Q(-7.46)PY(7.46)S(-7.46)E(-14.84)D(-22.13)T(-29.31)Q(-37.32)Q(-52.87)Q(-59.45)IIR(-70.47)	5	2	0.29337	By MS/MS		By MS/MS	103480000	103480000	0	0	3.3493	53284000	0	0	6.7027	0	0
B4DGF8;Q8N684;F5H669;J3QT54;F5H6M0;F5H047;C9JM38;C9J286;C9J323	108;108;108;108;108;108;108;108;108	B4DGF8	B4DGF8	Cleavage and polyadenylation specificity factor subunit 7	CPSF7		0.782268	5.57156	1.64347e-05	98.044	50.47	61.48	0.753945	4.86606	1.64347e-05	98.044	0.782268	5.57156	0.000986723	61.48	0.572321	1.29431	0.00127601	59.153		1	Y	TTDQQLIQVIRSIGVYDVVELKFAENRANGQ	X;X;X;X;X;X;X;X;X;X;X;X;X;X;X;B2;X;X;X;X;X;X;X;X;X;X;X;X;X;X;X	XXXXXXXXXXXPPPPPPPPPPPXXXXXXXXX	S(0.001)IGVY(0.782)D(0.217)VVELK	S(-30.06)IGVY(5.57)D(-5.57)VVE(-39.78)LK(-50.67)	5	2	0.16195	By MS/MS	By MS/MS	By MS/MS	1107800000	1107800000	0	0	15.421	279990000	295190000	306610000	24.911	8.4269	11.994
Q15046;Q6ZTI3;J3KRL2;H3BPV7	231;101;75;62	Q15046	Q15046	Lysine--tRNA ligase	KARS		0.996088	24.059	1.64347e-05	98.044	57.098	98.044					0.996088	24.059	1.64347e-05	98.044	0.957178	13.4937	0.00311996	68.557		1	Y	LHFGLKDKETRYRQRYLDLILNDFVRQKFII	X;X;X;X;X;X;X;X;X;X;X;X;X;X;X;B2;X;X;X;X;X;X;X;X;X;X;X;X;X;X;X	XXXXXXXXXXXXXXXPPPPPPPPPPPXXXXX	Y(0.996)LD(0.004)LILNDFVR	Y(24.06)LD(-24.06)LILN(-83.38)D(-89.51)FVR(-98.04)	1	2	1.199		By MS/MS	By MS/MS	40518000	40518000	0	0	0.51977	0	40518000	0	0	1.4019	NaN
A0A024R5K8;P50454;B4DN87;A8K259;E9PR70;E9PPV6;E9PK86;E9PMI5;Q9NPA9;E9PNX1;E9PJH8;E9PIG2;E9PRS3;E9PQ34	135;135;114;135;135;135;135;135;29;135;135;135;135;88	A0A024R5K8	A0A024R5K8	Serpin H1	SERPINH1;ra-a47		0.994386	23.3247	1.65224e-05	74.611	60.192	74.611					0.986557	19.4675	0.000169848	55.66	0.994386	23.3247	1.65224e-05	74.611		1	Y	NSTARNVTWKLGSRLYGPSSVSFADDFVRSS	X;X;X;X;X;X;X;X;X;X;X;X;X;X;X;B2;X;X;X;X;X;X;X;X;X;X;X;X;X;X;X	XXXXXXXXXXXXXXPPPPPPPPPPPPPPPXX	LY(0.994)GPS(0.005)S(0.001)VSFADDFVR	LY(23.32)GPS(-23.32)S(-30.07)VS(-50.36)FAD(-60.8)D(-65.61)FVR(-73.02)	2	2	-0.89309		By MS/MS	By MS/MS	54895000	54895000	0	0	0.32586	0	29641000	8208400	0	0.52601	0.13302
J3KS14;F5H478;B7Z4X9;J3KRU5;X6R3T8;J3QLH3;A0A024R8R0;J3QQJ0;Q9UHR5	11;46;46;46;46;46;46;29;46	J3KS14	J3KS14	SAP30-binding protein	SAP30BP		0.955107	17.7126	1.65587e-05	87.363	76.84	87.363	0.699165	5.31685	1.65587e-05	72.531	0.729969	7.53106	2.29777e-05	64.55	0.955107	17.7126	2.3177e-05	87.363		1	Y	_____XEKGGLVSDAYGEDDFSRLGGDEDGY	X;X;X;X;X;X;X;X;X;X;X;X;X;X;X;B2;X;X;X;X;X;X;X;X;X;X;X;X;X;X;X	XXXXXXXXPPPPPPPPPPPPPPPXXXXXXXX	GGLVS(0.016)D(0.016)AY(0.955)GE(0.011)D(0.001)DFSR	GGLVS(-17.71)D(-17.71)AY(17.71)GE(-19.29)D(-28.69)D(-48.1)FS(-55.35)R(-63.99)	8	2	0.87631	By MS/MS	By MS/MS	By MS/MS	80282000	80282000	0	0	1.2713	16315000	26727000	37241000	1.0152	1.0235	1.7762
B4DWZ4;Q6FHX6;P39748;I3L3E9	232;268;268;76	B4DWZ4	B4DWZ4	Flap endonuclease 1	FEN1		0.556204	3.26424	1.66962e-05	79.875	57.253	42.5	0.316558	0	2.13537e-05	67.234	0.556204	3.26424	1.66962e-05	72.88	0.25	0	3.38717e-05	79.875		1	Y	HKSIEEIVRRLDPNKYPVPENWLHKEAHQLF	X;X;X;X;X;X;X;X;X;X;X;X;X;X;X;B2;X;X;X;X;X;X;X;X;X;X;X;X;X;X;X	XXXXXXXXXPPPPPPPPPPPPPPPPXXXXXX	R(0.012)LD(0.012)PN(0.128)K(0.262)Y(0.556)PVPE(0.008)N(0.009)W(0.009)LH(0.001)K(0.002)	R(-16.67)LD(-16.67)PN(-6.39)K(-3.26)Y(3.26)PVPE(-18.21)N(-17.96)W(-17.71)LH(-25.82)K(-25.62)	7	4	0.038537		By MS/MS		57933000	57933000	0	0	NaN	0	57933000	0	NaN	NaN	NaN
B5MD87;B4DGI7;B4DI71;D3DWK4;A0A0A0MQS1;Q53H96	106;106;139;255;255;243	B5MD87	B5MD87	Pyrroline-5-carboxylate reductase;Pyrroline-5-carboxylate reductase 3	PYCRL		0.786305	6.86386	1.6784e-05	79.635	62.268	79.635	0.786305	6.86386	1.6784e-05	79.635	0.296179	0	0.00276585	42.041						1	Y	AQLRSDVCTPGGTTIYGLHALEQGGLRAATM	X;X;X;X;X;X;X;X;X;X;X;X;X;X;X;B2;X;X;X;X;X;X;X;X;X;X;X;X;X;X;X	XXXXPPPPPPPPPPPPPPPPPPPPPPPXXXX	SDVCTPGGT(0.034)T(0.162)IY(0.786)GLH(0.016)ALE(0.001)QGGLR	S(-45.23)D(-45.23)VC(-33.75)T(-34.27)PGGT(-13.59)T(-6.86)IY(6.86)GLH(-16.95)ALE(-30.98)Q(-38.5)GGLR(-37.72)	12	3	-1.8275	By MS/MS			82168000	82168000	0	0	NaN	82168000	0	0	NaN	NaN	NaN
V9HW72;A8K690;P31948	354;354;354	V9HW72	V9HW72	Stress-induced-phosphoprotein 1	HEL-S-94n;STIP1		0.999683	35.105	1.74491e-05	100.92	69.617	89.629	0.999384	32.2834	0.000130507	72.2	0.998447	28.2382	0.000219093	74.944	0.999683	35.105	1.74491e-05	100.92		1	Y	CQQAEKILKEQERLAYINPDLALEEKNKGNE	X;X;X;X;X;X;X;X;X;X;X;X;X;X;X;B2;X;X;X;X;X;X;X;X;X;X;X;X;X;X;X	XXXXXXXXXXXXXPPPPPPPPPPPPPXXXXX	LAY(1)INPDLALEEK	LAY(35.11)IN(-35.11)PD(-50.61)LALE(-75)E(-82.74)K(-84.34)	3	3	-1.0179	By MS/MS	By MS/MS	By MS/MS	973170000	973170000	0	0	1.3058	216420000	199030000	273930000	1.5722	0.6801	0.86972
P62277;J3KMX5	89;89	P62277	P62277	40S ribosomal protein S13	RPS13		0.76888	6.61228	1.76096e-05	79.889	47.776	78.136	0.76888	6.61228	2.09607e-05	78.136	0.754531	6.19883	1.76096e-05	75.474	0.753703	6.23435	2.31673e-05	79.889		1	Y	ILKSKGLAPDLPEDLYHLIKKAVAVRKHLER	X;X;X;X;X;X;X;X;X;X;X;X;X;X;X;B2;X;X;X;X;X;X;X;X;X;X;X;X;X;X;X	XXXXXPPPPPPPPPPPPPPPPXXXXXXXXXX	GLAPDLPE(0.013)D(0.038)LY(0.769)H(0.168)LIK(0.013)	GLAPD(-65.59)LPE(-17.79)D(-13.08)LY(6.61)H(-6.61)LIK(-17.79)	11	2	0.13789	By MS/MS	By MS/MS	By MS/MS	4804700000	4804700000	0	0	2.7423	1087800000	1565000000	2114600000	2.2176	2.036	4.2896
G3V1A4;V9HWI5;E9PK25;P23528;E9PP50	123;140;178;140;140	G3V1A4	G3V1A4	Cofilin-1	CFL1;HEL-S-15		0.843393	11.1836	1.8256e-05	99.864	85.657	99.864	0.698273	4.91385	0.000168609	87.806	0.730737	5.1925	8.23032e-05	86.18	0.843393	11.1836	1.8256e-05	99.864		1	Y	KKKLTGIKHELQANCYEEVKDRCTLAEKLGG	X;X;X;X;X;X;X;X;X;X;X;X;X;X;X;B2;X;X;X;X;X;X;X;X;X;X;X;X;X;X;X	XXXXXXXXPPPPPPPPPPPPPPXXXXXXXXX	HELQANC(0.003)Y(0.843)E(0.045)E(0.045)VK(0.064)	H(-94.91)E(-94.91)LQ(-73.48)AN(-43.65)C(-25.09)Y(11.18)E(-12.74)E(-12.74)VK(-11.18)	8	2	-0.13748	By MS/MS	By MS/MS	By MS/MS	1251200000	1251200000	0	0	3.6087	129280000	132250000	211520000	3.1327	0.85709	1.3995
Q68D16;A8MT37;A0A024R0L5;P49840;M0QYV0	39;52;134;134;47	Q68D16	Q68D16	Glycogen synthase kinase-3 alpha	DKFZp686D0638;GSK3A		0.88938	9.65332	1.87332e-05	96.342	68.817	77.379	0.88938	9.65332	0.000120446	77.379					0.882808	9.44378	1.87332e-05	96.342		1	Y	YTDIKVIGNGSFGVVYQARLAETRELVAIKK	X;X;X;X;X;X;X;X;X;X;X;X;X;X;X;B2;X;X;X;X;X;X;X;X;X;X;X;X;X;X;X	XXXXXPPPPPPPPPPPPPPXXXXXXXXXXXX	VIGNGSFGVVY(0.889)Q(0.096)AR(0.014)	VIGN(-56.01)GS(-43.5)FGVVY(9.65)Q(-9.65)AR(-17.95)	11	2	-0.21739	By MS/MS		By MS/MS	24616000	24616000	0	0	NaN	9420100	0	15196000	NaN	NaN	NaN
P49327;A0A0U1RQF0;A0A0U1RRG3	130;130;130	P49327	P49327	Fatty acid synthase;[Acyl-carrier-protein] S-acetyltransferase;[Acyl-carrier-protein] S-malonyltransferase;3-oxoacyl-[acyl-carrier-protein] synthase;3-oxoacyl-[acyl-carrier-protein] reductase;3-hydroxyacyl-[acyl-carrier-protein] dehydratase;Enoyl-[acyl-carrier-protein] reductase;Oleoyl-[acyl-carrier-protein] hydrolase	FASN		0.749226	5.64863	1.88756e-05	77.744	67.034	77.744	0.731278	5.54733	1.88756e-05	69.65					0.749226	5.64863	2.04669e-05	77.744		1	Y	ETSEALSRDPETLVGYSMVGCQRAMMANRLS	X;X;X;X;X;X;X;X;X;X;X;X;X;X;X;B2;X;X;X;X;X;X;X;X;X;X;X;X;X;X;X	XXXXXXXXPPPPPPPPPPPPPPPXXXXXXXX	DPETLVGY(0.749)S(0.204)M(0.042)VGC(0.002)Q(0.001)R(0.001)	D(-54.73)PE(-49.04)T(-39.03)LVGY(5.65)S(-5.65)M(-12.47)VGC(-25.58)Q(-28.76)R(-28.39)	8	2	-0.73305	By MS/MS		By MS/MS	16975000	16975000	0	0	NaN	6096300	0	10879000	NaN	NaN	NaN
Q9UNE7	62	Q9UNE7	Q9UNE7	E3 ubiquitin-protein ligase CHIP	STUB1		0.555906	6.36766	1.89309e-05	96.665	56.62	60.434	0.555906	6.36766	0.0011168	60.434					0.441487	3.48715	1.89309e-05	96.665		1	Y	ACYGRAITRNPLVAVYYTNRALCYLKMQQHE	X;X;X;X;X;X;X;X;X;X;X;X;X;X;X;B2;X;X;X;X;X;X;X;X;X;X;X;X;X;X;X	XXXXXXXXXPPPPPPPPPPPXXXXXXXXXXX	NPLVAVY(0.556)Y(0.07)T(0.128)N(0.128)R(0.117)	N(-53.9)PLVAVY(6.37)Y(-9)T(-6.37)N(-6.37)R(-6.75)	7	2	2.0726	By MS/MS			21302000	21302000	0	0	1.1588	21302000	0	0	4.4594	0	0
K7EQA8;Q86X55	273;314	K7EQA8	K7EQA8	Histone-arginine methyltransferase CARM1	CARM1		0.519566	1.17968	1.90978e-05	69.422	54.001	69.422	0.441907	0	5.99708e-05	67.645	0.519566	1.17968	1.90978e-05	69.422	0.457472	0	0.000109234	61.87		1	Y	DEQLYMEQFTKANFWYQPSFHGVDLSALRGA	X;X;X;X;X;X;X;X;X;X;X;X;X;X;X;B2;X;X;X;X;X;X;X;X;X;X;X;X;X;X;X	XXXXXXXXXXXPPPPPPPPPPPPPPPPPPXX	AN(0.076)FW(0.396)Y(0.52)Q(0.008)PSFHGVDLSALR	AN(-8.32)FW(-1.18)Y(1.18)Q(-18.2)PS(-38.02)FH(-50)GVD(-59.94)LS(-64.72)ALR(-67.97)	5	3	0.91609		By MS/MS		69153000	69153000	0	0	NaN	0	69153000	0	NaN	NaN	NaN
B4DQI7;A8K4I8;Q9BPW8	241;261;261	B4DQI7	B4DQI7	Protein NipSnap homolog 1	NIPSNAP1		0.803035	6.9423	1.91499e-05	96.113	81.956	96.113	0	0		NaN	0.803035	6.9423	1.91499e-05	96.113	0.363258	0	0.00118975	50.284		1	Y	TRNAAWRKRGWDENVYYTVPLVRHMESRIMI	X;X;X;X;X;X;X;X;X;X;X;X;X;X;X;B2;X;X;X;X;X;X;X;X;X;X;X;X;X;X;X	XXXXXXXXXPPPPPPPPPPPPPPXXXXXXXX	GWDEN(0.001)VY(0.803)Y(0.162)T(0.033)VPLVR	GW(-54.11)D(-40.1)E(-32.93)N(-28.91)VY(6.94)Y(-6.94)T(-13.85)VPLVR(-61.36)	7	2	-1.6807	By matching	By MS/MS	By matching	204880000	204880000	0	0	NaN	33936000	60156000	69408000	NaN	NaN	NaN
H7C2W9;C9JU56;B7Z4E3;B2R4C1;B7Z4C8;P62899;Q76N53	96;108;108;108;108;108;30	H7C2W9	H7C2W9	60S ribosomal protein L31	RPL31		0.87987	8.71689	1.93297e-05	96.015	68.9	96.015	0.466754	0	0.000975632	62.042	0.87987	8.71689	1.93297e-05	96.015	0.854893	7.81079	7.11915e-05	77.527		1	Y	NEDEDSPNKLYTLVTYVPVTTFKIFFLR___	X;X;X;X;X;X;X;X;X;X;X;X;X;X;X;B2;X;X;X;X;X;X;X;X;X;X;X;X;X;X;X	XXXXXXXXXPPPPPPPPPPPPPPXXXXXXXX	LYT(0.002)LVT(0.118)Y(0.88)VPVTTFK	LY(-37.64)T(-27.12)LVT(-8.72)Y(8.72)VPVT(-44.75)T(-52.5)FK(-50.88)	7	2	-0.99752		By MS/MS	By MS/MS	1238700000	1238700000	0	0	7.9406	0	880510000	0	0	23.223	0
A0A0S2Z4Q3;A0A0S2Z4K2;P62633	92;99;99	A0A0S2Z4Q3	A0A0S2Z4Q3	Cellular nucleic acid-binding protein	CNBP		0.633741	5.72947	1.96048e-05	82.069	72.414	41.025	0.293083	0	2.63035e-05	82.069	0.286319	0	2.0969e-05	77.894	0.633741	5.72947	1.96048e-05	69.108		1	Y	AKDCKEPKREREQCCYNCGKPGHLARDCDHA	X;X;X;X;X;X;X;X;X;X;X;X;X;X;X;B2;X;X;X;X;X;X;X;X;X;X;X;X;X;X;X	XXXXXXXXXXXPPPPPPPPPXXXXXXXXXXX	E(0.019)Q(0.019)C(0.12)C(0.169)Y(0.634)N(0.03)C(0.009)GK(0.001)	E(-15.29)Q(-15.29)C(-7.23)C(-5.73)Y(5.73)N(-13.29)C(-18.64)GK(-28.2)	5	2	-0.84729	By matching	By matching	By MS/MS	1113900000	1113900000	0	0	14.124	237490000	490040000	386350000	13.304	13.897	15.003
V9HWE0;P08758;D6RBL5;D6RBE9	257;257;197;157	V9HWE0	V9HWE0	Annexin;Annexin A5	HEL-S-7;ANXA5		0.611097	6.17381	2.00969e-05	68.132	36.903	68.132					0	0		NaN	0.611097	6.17381	2.00969e-05	68.132		1	Y	KSIRSIPAYLAETLYYAMKGAGTDDHTLIRV	X;X;X;X;X;X;X;X;X;X;X;X;X;X;X;B2;X;X;X;X;X;X;X;X;X;X;X;X;X;X;X	XXXXPPPPPPPPPPPPPPPXXXXXXXXXXXX	SIPAYLAE(0.002)T(0.006)LY(0.124)Y(0.611)AM(0.109)K(0.147)	S(-62.29)IPAY(-54.23)LAE(-24.03)T(-20.16)LY(-6.92)Y(6.17)AM(-7.49)K(-6.17)	12	2	-3.046		By matching	By MS/MS	176180000	176180000	0	0	0.6938	0	8738400	167440000	0	0.085056	10.23
B4DRY5;A0A024R7F7;Q4LE60;O14787;A0A024RAM0;Q92973;S4R398	770;777;941;787;788;788;83	B4DRY5;A0A024RAM0	A0A024RAM0	Transportin-2;Transportin-1	TNPO2;TNPO2 variant protein;TNPO1		0.972909	15.6186	2.02347e-05	68.481	48.903	68.481	0.939402	13.3904	0.000451094	46.249	0.972909	15.6186	2.02347e-05	68.481						1	Y	KTLLENTAITIGRLGYVCPQEVAPMLQQFIR	X;X;X;X;X;X;X;X;X;X;X;X;X;X;X;B2;X;X;X;X;X;X;X;X;X;X;X;X;X;X;X	XXXXXXXXXXXXXPPPPPPPPPPPPPPPPPP	LGY(0.973)VC(0.027)PQEVAPMLQQFIR	LGY(15.62)VC(-15.62)PQ(-34.09)E(-45.25)VAPM(-66.18)LQ(-67.94)Q(-68.31)FIR(-68.45)	3	3	-1.924	By MS/MS	By MS/MS		97870000	97870000	0	0	NaN	47161000	50709000	0	NaN	NaN	NaN
V9HWF4;P00558	76;76	V9HWF4	V9HWF4	Phosphoglycerate kinase;Phosphoglycerate kinase 1	HEL-S-68p;PGK1		0.775406	5.38181	2.05155e-05	102.62	71.935	89.029	0.499996	0	2.05155e-05	102.62	0.499995	0	7.79643e-05	91.584	0.775406	5.38181	0.000113845	89.029		1	Y	MSHLGRPDGVPMPDKYSLEPVAVELKSLLGK	X;X;X;X;X;X;X;X;X;X;X;X;X;X;X;B2;X;X;X;X;X;X;X;X;X;X;X;X;X;X;X	XXXXXXXXXXXXXXXPPPPPPPPPPPXXXXX	Y(0.775)S(0.225)LEPVAVELK	Y(5.38)S(-5.38)LE(-44.72)PVAVE(-84.58)LK(-89.03)	1	2	-0.22126	By MS/MS	By MS/MS	By MS/MS	545150000	545150000	0	0	0.89296	152630000	211070000	181450000	0.40622	1.0188	6.5784
Q59G75;P41252;A0A0A0MSX9;Q7Z3U5;J3KR24;Q7Z355;Q6P0M4	643;626;626;626;516;516;471	Q59G75	Q59G75	Isoleucine--tRNA ligase, cytoplasmic	IARS;DKFZp686L0869;DKFZp686L17145		1	65.5411	2.0523e-05	91.584	63.571	91.584	0.999995	53.9775	0.00365041	68.657	0.999998	56.8631	2.0523e-05	91.584	1	65.5411	2.0523e-05	91.584		1	Y	PVSIIQKYGADALRLYLINSPVVRAENLRFK	X;X;X;X;X;X;X;X;X;X;X;X;X;X;X;B2;X;X;X;X;X;X;X;X;X;X;X;X;X;X;X	XXXXXXXXXXXXXXPPPPPPPPPPXXXXXXX	LY(1)LINSPVVR	LY(65.54)LIN(-65.54)S(-72.34)PVVR(-91.58)	2	3	-0.87056	By MS/MS	By MS/MS	By MS/MS	84554000	84554000	0	0	2.3104	0	5479800	8076900	0	0.49985	0.56492
Q5TDE9;Q5TDF0;Q9BSD7	37;37;37	Q5TDE9	Q5TDE9	Cancer-related nucleoside-triphosphatase	C1orf57;NTPCR		0.794042	7.88681	2.06403e-05	81.92	68.653	67.456	0.794042	7.88681	2.06403e-05	67.456	0.788868	7.30879	2.57233e-05	81.92	0.756779	7.0071	2.24719e-05	65.179		1	Y	ASEVLKSSGVPVDGFYTEEVRQGGRRIGFDV	X;X;X;X;X;X;X;X;X;X;X;X;X;X;X;B2;X;X;X;X;X;X;X;X;X;X;X;X;X;X;X	XXXXXXPPPPPPPPPPPPPPPXXXXXXXXXX	SSGVPVD(0.022)GFY(0.794)T(0.129)E(0.022)E(0.032)VR(0.001)	S(-44.74)S(-44.74)GVPVD(-15.62)GFY(7.89)T(-7.89)E(-15.62)E(-13.89)VR(-30.47)	10	2	-1.0831	By MS/MS	By MS/MS	By MS/MS	64725000	64725000	0	0	1.7095	23926000	22740000	18059000	2.4886	1.8004	1.1564
Q08211;Q58F26;Q6PJK6	534;534;534	Q08211	Q08211	ATP-dependent RNA helicase A	DHX9		0.987434	21.0036	2.06533e-05	93.551	71.403	93.551	0.987434	21.0036	2.06533e-05	93.551	0.966063	16.3903	0.000405769	76.827	0.987434	21.0036	2.06533e-05	93.551		1	Y	NTDFLLVVLRDVVQAYPEVRIVLMSATIDTS	X;X;X;X;X;X;X;X;X;X;X;X;X;X;X;B2;X;X;X;X;X;X;X;X;X;X;X;X;X;X;X	XXXXXXXXXXPPPPPPPPPPXXXXXXXXXXX	DVVQ(0.008)AY(0.987)PE(0.004)VR	D(-73.22)VVQ(-21)AY(21)PE(-23.6)VR(-33.75)	6	2	-2.352	By MS/MS	By MS/MS	By MS/MS	40201000	40201000	0	0	1.2011	9816000	16347000	14037000	1.1151	1.4752	1.0333
Q9NR12;D6RF83;H7BYK4;D6RH06	104;104;121;104	Q9NR12	Q9NR12	PDZ and LIM domain protein 7	PDLIM7		0.964798	14.3787	2.0971e-05	95.642	76.03	95.642	0.49987	0	0.00512352	46.022	0.499999	0	0.000655023	67.881	0.964798	14.3787	2.0971e-05	95.642		1	Y	SKPQKASAPAADPPRYTFAPSVSLNKTARPF	X;X;X;X;X;X;X;X;X;X;X;X;X;X;X;B2;X;X;X;X;X;X;X;X;X;X;X;X;X;X;X	XXXXXXXXXXXXXXXPPPPPPPPPPPXXXXX	Y(0.965)T(0.035)FAPSVSLNK	Y(14.38)T(-14.38)FAPS(-80.43)VS(-84.01)LN(-93.61)K(-95.06)	1	2	-1.1856		By MS/MS	By MS/MS	98257000	98257000	0	0	NaN	0	41137000	57119000	NaN	NaN	NaN
A0A0S2Z4V5;O60828;A0A0S2Z556;H7C053	245;245;261;139	A0A0S2Z4V5	A0A0S2Z4V5	Polyglutamine-binding protein 1	PQBP1		0.999972	45.6018	2.12161e-05	71.651	55.571	68.383	0.999351	32.0155	2.22566e-05	71.052	0.999972	45.6018	5.29741e-05	68.383	0.999806	37.2607	2.12161e-05	71.651		1	Y	GADTTAAGPLFQQRPYPSPGAVLRANAEASR	X;X;X;X;X;X;X;X;X;X;X;X;X;X;X;B2;X;X;X;X;X;X;X;X;X;X;X;X;X;X;X	PPPPPPPPPPPPPPPPPPPPPPPPXXXXXXX	PY(1)PSPGAVLR	PY(45.6)PS(-45.6)PGAVLR(-65.85)	2	2	-0.49456	By MS/MS	By MS/MS	By MS/MS	147830000	147830000	0	0	NaN	33298000	42330000	37821000	NaN	NaN	NaN
Q9NT62;F8WDI0	18;18	Q9NT62	Q9NT62	Ubiquitin-like-conjugating enzyme ATG3	ATG3		0.842885	7.33438	2.15975e-05	99.568	77.464	96.015	0.770176	5.25888	2.15975e-05	99.568	0.842885	7.33438	3.24946e-05	96.015	0.805034	6.19468	0.000111385	91.549		1	Y	NVINTVKGKALEVAEYLTPVLKESKFKETGV	X;X;X;X;X;X;X;X;X;X;X;X;X;X;X;B2;X;X;X;X;X;X;X;X;X;X;X;X;X;X;X	XXXXXXXXXPPPPPPPPPPPPPXXXXXXXXX	ALEVAE(0.156)Y(0.843)LT(0.001)PVLK	ALE(-42.69)VAE(-7.33)Y(7.33)LT(-29.09)PVLK(-34.25)	7	2	0.1732	By MS/MS	By MS/MS	By MS/MS	429080000	429080000	0	0	NaN	228550000	153040000	47491000	NaN	NaN	NaN
A8K646;Q92882	152;152	A8K646	A8K646	Osteoclast-stimulating factor 1	OSTF1		0.998938	29.7358	2.17246e-05	98.582	73.008	98.582					0.977159	16.3756	0.00110615	56.434	0.998938	29.7358	2.17246e-05	98.582		1	Y	NKLGDTALHAAAWKGYADIVQLLLAKGARTD	X;X;X;X;X;X;X;X;X;X;X;X;X;X;X;B2;X;X;X;X;X;X;X;X;X;X;X;X;X;X;X	XXXXXXXXXXXXXXPPPPPPPPPPPPXXXXX	GY(0.999)AD(0.001)IVQLLLAK	GY(29.74)AD(-29.74)IVQ(-68.02)LLLAK(-98.58)	2	2	-0.85125		By MS/MS	By MS/MS	208590000	208590000	0	0	12.456	0	86733000	121860000	0	NaN	NaN
Q9UK43;B2R5Y4;Q13123;B4DEH2;Q95HA6	288;288;288;100;288	Q9UK43	Q9UK43	Protein Red	CSA2;IK		0.888405	9.48561	2.21667e-05	123.98	50.097	123.98	0.862515	8.55899	0.00023179	101.72	0.888405	9.48561	2.21667e-05	123.98	0.785297	7.34159	0.000233449	102.95		1	Y	TTNDIVISKLTQILSYLRQGTRNKKLKKKDK	X;X;X;X;X;X;X;X;X;X;X;X;X;X;X;B2;X;X;X;X;X;X;X;X;X;X;X;X;X;X;X	XXXXXXXXXPPPPPPPPPXXXXXXXXXXXXX	LTQILS(0.1)Y(0.888)LR(0.012)	LT(-118.67)Q(-94.61)ILS(-9.49)Y(9.49)LR(-18.85)	7	2	2.1272	By MS/MS	By MS/MS	By MS/MS	81951000	81951000	0	0	NaN	17423000	37260000	27268000	NaN	NaN	NaN
P62318	62	P62318	P62318	Small nuclear ribonucleoprotein Sm D3	SNRPD3		0.969346	15.0753	2.27026e-05	93.267	63.192	93.267	0.95397	13.358	0.000451738	75.696	0.969346	15.0753	2.27026e-05	93.267	0.887345	8.9875	0.000280608	79.906		1	Y	TVTYRDGRVAQLEQVYIRGSKIRFLILPDML	X;X;X;X;X;X;X;X;X;X;X;X;X;X;X;B2;X;X;X;X;X;X;X;X;X;X;X;X;X;X;X	XXXXXXXXPPPPPPPPPPXXXXXXXXXXXXX	VAQLEQ(0.001)VY(0.969)IR(0.03)	VAQ(-82.44)LE(-53.27)Q(-32.68)VY(15.08)IR(-15.08)	8	2	-1.832	By MS/MS	By MS/MS	By MS/MS	119520000	119520000	0	0	NaN	46745000	28795000	43982000	NaN	NaN	NaN
A8K5Q1;Q7L2J0	316;316	A8K5Q1	A8K5Q1	7SK snRNA methylphosphate capping enzyme	MEPCE		0.605853	5.99583	2.30803e-05	79.82	63.044	60.255									0.605853	5.99583	2.30803e-05	79.82		1	Y	QQPRHRGQNRDAPQPYELNTAINCRDEVVSP	X;X;X;X;X;X;X;X;X;X;X;X;X;X;X;B2;X;X;X;X;X;X;X;X;X;X;X;X;X;X;X	XXXXXXXXXXPPPPPPPPPPPPPPPXXXXXX	D(0.152)APQ(0.12)PY(0.606)E(0.12)LN(0.001)TAINCR	D(-6)APQ(-7.02)PY(6)E(-7.02)LN(-28.66)T(-34.78)AIN(-54.76)C(-54.65)R(-54.53)	6	2	-1.2096			By MS/MS	13513000	13513000	0	0	NaN	0	0	13513000	NaN	NaN	NaN
B4DWA8;B3KP88;B4DDG4;B4DVE1;A0A0S2Z3Y1;Q08380;B4DI70	334;349;353;441;453;453;281	B4DWA8	B4DWA8	Galectin-3-binding protein	LGALS3BP		0.832659	10.2621	2.35157e-05	98.943	92.054	98.943	0.832659	10.2621	2.35157e-05	98.943	0	0		NaN	0	0		NaN		1	Y	PLVKYSSDYFQAPSDYRYYPYQSFQTPQHPS	X;X;X;X;X;X;X;X;X;X;X;X;X;X;X;B2;X;B2;X;X;B2;X;B2;X;X;X;X;X;X;X;X	XXXXPPPPPPPPPPPPPXXXXXXXXXXXXXX	YSSDYFQAPS(0.011)D(0.078)Y(0.833)R(0.078)	Y(-96.21)S(-96.21)S(-91.56)D(-91.56)Y(-78.07)FQ(-54.74)APS(-18.97)D(-10.26)Y(10.26)R(-10.26)	12	2	-0.74986	By MS/MS			14770000	14770000	0	0	0.31248	14770000	0	0	1.1475	0	0
A0A384N6C2;P12268;H0Y4R1	459;459;415	A0A384N6C2	A0A384N6C2	Inosine-5'-monophosphate dehydrogenase 2	IMPDH2		0.999618	36.4112	2.41352e-05	65.022	52.662	65.022	0.999618	36.4112	2.41352e-05	65.022	0.998208	29.9743	0.000106795	54.253	0.995988	26.6437	0.000423763	44.468		1	Y	SGAVQDKGSIHKFVPYLIAGIQHSCQDIGAK	X;X;X;X;X;X;X;X;X;X;X;X;X;X;X;B2;X;X;X;X;X;X;X;X;X;X;X;X;X;X;X	XXXXXXXXXXXXPPPPPPPPPPPPPPPPPPP	FVPY(1)LIAGIQHSCQDIGAK	FVPY(36.41)LIAGIQ(-36.41)H(-40.74)S(-44.85)C(-48.71)Q(-48.02)D(-51.69)IGAK(-61.68)	4	3	-1.0447	By matching	By MS/MS	By MS/MS	3705300000	3705300000	0	0	NaN	1018700000	1276600000	1410000000	NaN	NaN	NaN
H7C3P9;Q9UNS2;J3QKR0;K7ES36;C9JLV5	75;95;95;23;95	H7C3P9	H7C3P9	COP9 signalosome complex subunit 3	COPS3		0.884468	13.6115	2.46055e-05	79.467	68.982	79.467	0.689529	8.24023	7.23735e-05	67.579	0.884468	13.6115	2.46055e-05	79.467						1	Y	QVQLFISTCNGEHIRYATDTFAGLCHQLTNA	X;X;X;X;X;X;X;X;X;X;X;X;X;X;X;B2;X;X;X;X;X;X;X;X;X;X;X;X;X;X;X	XXXXXXXXXXXXXXXPPPPPPPPPPPPPPPP	Y(0.884)AT(0.039)D(0.039)T(0.039)FAGLCHQLTNALVER	Y(13.61)AT(-13.61)D(-13.61)T(-13.61)FAGLC(-49.63)H(-54.92)Q(-63.17)LT(-74.46)N(-77.11)ALVE(-79.4)R(-79.43)	1	3	-0.20821	By MS/MS	By MS/MS		253520000	253520000	0	0	NaN	112650000	140870000	0	NaN	NaN	NaN
P78318	277	P78318	P78318	Immunoglobulin-binding protein 1	IGBP1		1	74.0744	2.49615e-05	95.358	69.239	93.178	1	63.6669	0.000115364	88.921	1	67.1495	2.49615e-05	95.358	1	74.0744	5.55783e-05	93.178		1	Y	LPTMTVSDWYEQHRKYGALPDQGIAKAAPEE	X;X;X;X;X;X;X;X;X;X;X;X;X;X;X;B2;X;X;X;X;X;X;X;X;X;X;X;X;X;X;X	XXXXXXXXXXXXXXXPPPPPPPPPPPXXXXX	Y(1)GALPDQGIAK	Y(74.07)GALPD(-74.07)Q(-83.99)GIAK(-93.18)	1	2	-0.51998	By MS/MS	By MS/MS	By MS/MS	274850000	274850000	0	0	16.105	72746000	85143000	116960000	9.3476	NaN	12.598
A0A384NKW7;P55060;B4DUC5;B4DM31;B4DPS6;B4DS32	749;749;532;540;438;347	A0A384NKW7	A0A384NKW7	Exportin-2	CSE1L		0.770332	10.7043	2.51456e-05	57.803	43.343	57.803	0.565315	7.61973	2.93329e-05	53.751	0.770332	10.7043	2.51456e-05	57.803	0.509007	6.42508	0.000335048	44.811		1	Y	FQKLIASKANDHQGFYLLNSIIEHMPPESVD	X;X;X;X;X;X;X;X;X;X;X;X;X;X;X;B2;X;X;X;X;X;X;X;X;X;X;X;X;X;X;X	XXXXXXXXPPPPPPPPPPPPPPPPPPPPPPP	AN(0.044)D(0.041)H(0.041)Q(0.066)GFY(0.77)LLN(0.015)S(0.015)IIE(0.005)H(0.002)M(0.001)PPESVDQYR	AN(-12.47)D(-12.73)H(-12.73)Q(-10.7)GFY(10.7)LLN(-16.98)S(-16.98)IIE(-21.57)H(-26.68)M(-31.53)PPE(-48.09)S(-51.1)VD(-53.44)Q(-55.43)Y(-55.37)R(-55.39)	8	4	-3.088	By MS/MS	By MS/MS	By MS/MS	351320000	351320000	0	0	0.58163	82356000	103420000	113640000	0.47186	0.95074	0.35436
A0A0G2JLD8;E7EUY5;Q567R6;A4D1U3;B7Z268;Q04837;C9K0U8	73;73;73;73;73;73;73	A0A0G2JLD8	A0A0G2JLD8	Single-stranded DNA-binding protein;Single-stranded DNA-binding protein, mitochondrial	SSBP1		0.987316	21.2197	2.52261e-05	89.266	65.947	81.525	0.880598	13.1679	2.78941e-05	62.799	0.987207	22.7062	1.87598e-05	89.266	0.987316	21.2197	2.52261e-05	81.525		1	Y	SLATNEMWRSGDSEVYQLGDVSQKTTWHRIS	X;X;X;X;X;X;X;X;X;X;X;X;X;X;X;B2;X;X;X;X;X;X;X;X;X;X;X;X;X;X;X	XXXXXXXXXPPPPPPPPPPPPPPPXXXXXXX	SGDSE(0.005)VY(0.987)Q(0.007)LGDVSQK	S(-39.48)GD(-39.98)S(-37.92)E(-23.39)VY(21.22)Q(-21.22)LGD(-34.88)VS(-48.79)Q(-54.55)K(-59.96)	7	2	-0.47242	By MS/MS	By MS/MS	By MS/MS	1377000000	1377000000	0	0	6.8044	355670000	312240000	345460000	5.8646	4.2163	5.1055
B4DNN4;Q53GZ5;P23921;B4E0I8;E9PL69;B4DXB0;B4DS95;E9PP77;H0YCY7	202;232;232;135;10;10;151;10;45	B4DNN4	B4DNN4	Ribonucleoside-diphosphate reductase;Ribonucleoside-diphosphate reductase large subunit	RRM1		0.866776	10.0847	2.52542e-05	97.277	79.538	78.932	0.80789	8.24844	2.52542e-05	97.277					0.866776	10.0847	0.000296681	78.932		1	Y	SCFLLSMKDDSIEGIYDTLKQCALISKSAGG	X;X;X;X;X;X;X;X;X;X;X;X;X;X;X;B2;X;X;X;X;X;X;X;X;X;X;X;X;X;X;X	XXXXXXXXPPPPPPPPPPPPXXXXXXXXXXX	DDSIE(0.006)GIY(0.867)D(0.085)T(0.023)LK(0.02)	D(-66.97)D(-66.97)S(-57.84)IE(-21.9)GIY(10.08)D(-10.08)T(-15.75)LK(-16.47)	8	2	-1.2513	By MS/MS		By MS/MS	308150000	308150000	0	0	NaN	228400000	0	79758000	NaN	NaN	NaN
A0A2Z6ATB6;Q16643;D6R9W4;D6RFI1;D6RCR4	80;80;79;80;17	A0A2Z6ATB6	A0A2Z6ATB6	Drebrin	DBN1		0.997091	26.1854	2.54768e-05	62.378	52.457	62.378					0.997091	26.1854	2.54768e-05	62.378						1	Y	YGFCSVKDSQAALPKYVLINWVGEDVPDARK	X;X;X;X;X;X;X;X;X;X;X;X;X;X;X;B2;X;X;X;X;X;X;X;X;X;X;X;X;X;X;X	XXXXXXXXXXXXXXXPPPPPPPPPPPPPPPX	Y(0.997)VLIN(0.002)WVGEDVPDAR	Y(26.19)VLIN(-26.19)W(-33.42)VGE(-45.95)D(-45.44)VPD(-58.34)AR(-62.15)	1	3	-1.6632		By MS/MS		19575000	19575000	0	0	1.4383	0	19575000	0	NaN	NaN	0
Q96HE7	431	Q96HE7	Q96HE7	ERO1-like protein alpha	ERO1L		0.687722	6.66937	2.62968e-05	63.46	53.929	59.281	0	0		NaN	0.687722	6.66937	6.82275e-05	59.281	0.635634	5.52385	2.62968e-05	63.46		1	Y	FSEKLIANMPESGPSYEFHLTRQEIVSLFNA	X;X;X;X;X;X;X;X;X;X;X;X;X;X;X;B2;X;X;X;X;X;X;X;X;X;X;X;X;X;X;X	XXXXPPPPPPPPPPPPPPPPPPXXXXXXXXX	LIANMPE(0.001)S(0.002)GPS(0.148)Y(0.688)E(0.148)FH(0.008)LT(0.002)R(0.003)	LIAN(-36.85)M(-37.06)PE(-28.6)S(-25.45)GPS(-6.67)Y(6.67)E(-6.67)FH(-19.42)LT(-24.56)R(-24.11)	12	3	-0.50147	By matching	By MS/MS	By MS/MS	152790000	152790000	0	0	NaN	17805000	37022000	89706000	NaN	NaN	NaN
B2RDR4;A4D0U5;Q9UGI8;E0X098;F8W7T0	145;145;145;102;60	B2RDR4	B2RDR4	Testin	TES		0.839274	7.63621	2.69105e-05	96.665	84.799	96.665	0.451549	0	0.0179732	48.284	0.839274	7.63621	2.69105e-05	96.665	0.50125	1.07497	0.000603775	61.593		1	Y	LPKEKQPVAGSEGAQYRKKQLAKQLPAHDQD	X;X;X;X;X;X;X;X;X;X;X;X;X;X;X;B2;X;X;X;X;X;X;X;X;X;X;X;X;X;X;X	XXXPPPPPPPPPPPPPPXXXXXXXXXXXXXX	QPVAGSEGAQ(0.016)Y(0.839)R(0.145)	Q(-92.37)PVAGS(-53.15)E(-54.33)GAQ(-17.18)Y(7.64)R(-7.64)	11	2	0.34694		By MS/MS	By MS/MS	177750000	177750000	0	0	8.1966	0	38688000	64792000	0	5.3722	6.8725
Q96HX3;Q6IBR0;Q53EP4;P04843;B4DL99	103;142;142;142;116	Q96HX3	Q96HX3	Dolichyl-diphosphooligosaccharide--protein glycosyltransferase subunit 1	RPN1		0.883325	13.6555	2.75507e-05	75.71	57.442	68.192	0.464923	3.23885	6.94911e-05	61.612	0.539039	4.61856	2.75507e-05	75.71	0.883325	13.6555	5.18553e-05	68.192		1	Y	ISVIVETVYTHVLHPYPTQITQSEKQFVVFE	X;X;X;X;X;X;X;X;X;X;X;X;X;X;X;B2;X;X;X;X;X;X;X;X;X;X;X;X;X;X;X	PPPPPPPPPPPPPPPPPPPPPPPPPXXXXXX	ISVIVETVY(0.001)T(0.004)H(0.014)VLH(0.03)PY(0.883)PT(0.029)Q(0.038)IT(0.002)QSEK	IS(-55.7)VIVE(-41.78)T(-37.83)VY(-29.45)T(-23.89)H(-18.14)VLH(-14.7)PY(13.66)PT(-14.91)Q(-13.66)IT(-27.57)Q(-39.79)S(-44.33)E(-43.56)K(-43.17)	16	4	-2.0337		By MS/MS	By MS/MS	230260000	230260000	0	0	NaN	0	81766000	148500000	NaN	NaN	NaN
E7EX17;B4DRM3;P23588;B4DEP6;F8VSC7;F8W0K0;F8VP89	211;211;211;211;211;165;211	E7EX17;F8VP89	E7EX17	Eukaryotic translation initiation factor 4B	EIF4B		0.986926	21.2474	2.75682e-05	94.616	80.359	91.636	0.970822	18.3502	8.28738e-05	77.062	0.984753	18.4734	2.75682e-05	94.616	0.986926	21.2474	8.47684e-05	91.636		1	Y	DTDWRARPATDSFDDYPPRRGDDSFGDKYRD;DTDWRARPATDSFDDYPPRRGDDSFGDSYDS	X;X;X;X;X;X;X;X;X;X;X;X;X;X;X;B2;X;X;X;X;X;X;X;X;X;X;X;B2;B2;X;X	XXXXXPPPPPPPPPPPPPPXXXXXXXXXXXX	PATDSFDD(0.007)Y(0.987)PPR(0.005)	PAT(-61.86)D(-54.05)S(-42.48)FD(-33.75)D(-21.25)Y(21.25)PPR(-22.79)	9	2	-0.056801	By MS/MS	By MS/MS	By MS/MS	734380000	734380000	0	0	8.934	90309000	104960000	82054000	4.6149	3.733	2.3774
B3KTJ9;Q8N163;H0YC69;E5RGU7;E5RFJ3;H0YC58	100;100;53;100;100;108	B3KTJ9	B3KTJ9	Cell cycle and apoptosis regulator protein 2	CCAR2		0.884853	8.85717	2.84103e-05	84.054	58.395	84.054	0.860349	8.10896	0.00119396	47.894	0.84854	7.49018	3.75173e-05	62.536	0.884853	8.85717	2.84103e-05	84.054		1	Y	GRLPQLGEKVLVKAAYNPGQAVPWNAVKVQT	X;X;X;X;X;X;X;X;X;X;X;X;X;X;X;B2;X;X;X;X;X;X;X;X;X;X;X;X;X;X;X	XXXXXXXXXXXXXPPPPPPPPPPPPPPPXXX	AAY(0.885)N(0.115)PGQAVPWNAVK	AAY(8.86)N(-8.86)PGQ(-45.34)AVPW(-78.05)N(-80.65)AVK(-84.05)	3	2	-0.11822	By MS/MS	By MS/MS	By MS/MS	122570000	122570000	0	0	NaN	30851000	45773000	45946000	NaN	NaN	NaN
E7ERK9;Q9UI10;A0A087WTA5;Q71US4;Q9Y3W7;A0A087WW69;Q9HBP7;F8W8L6;Q59FC8;B4DUP5;H7C2L8	168;147;144;144;18;132;132;147;140;131;6	E7ERK9	E7ERK9	Translation initiation factor eIF-2B subunit delta	EIF2B4;DKFZp586J0119		0.834087	7.01472	2.86232e-05	97.277	73.188	97.277	0.499881	0	0.0223405	77.533	0.493532	0	0.0615474	58.37	0.834087	7.01472	2.86232e-05	97.277		1	Y	STAGETPSGVKRLPEYPQVDDLLLRRLVKKP	X;X;X;X;X;X;X;X;X;X;X;X;X;X;X;B2;X;X;X;X;X;X;X;X;X;X;X;X;X;X;X	XXXXXXXXXXXXPPPPPPPPPPPPPXXXXXX	LPE(0.166)Y(0.834)PQVDDLLLR	LPE(-7.01)Y(7.01)PQ(-42.04)VD(-58.27)D(-68.78)LLLR(-90.74)	4	2	-4.2385			By MS/MS	28237000	28237000	0	0	NaN	0	0	28237000	NaN	NaN	NaN
P62269;J3JS69	95;25	P62269	P62269	40S ribosomal protein S18	RPS18		0.727656	4.43639	2.91901e-05	95.822	74.45	77.358	0.49891	0	4.73009e-05	94.66	0.718853	4.16674	2.91901e-05	95.822	0.727656	4.43639	0.000316665	77.358		1	Y	PDWFLNRQKDVKDGKYSQVLANGLDNKLRED	X;X;X;X;X;X;X;X;X;X;X;X;X;X;X;B2;X;X;X;X;X;X;X;X;X;X;X;X;X;X;X	XXXXXXXXXXXXXXXPPPPPPPPPPPPXXXX	Y(0.728)S(0.262)Q(0.01)VLANGLDNK	Y(4.44)S(-4.44)Q(-18.47)VLAN(-61.48)GLD(-73.75)N(-76.67)K(-77.36)	1	2	0.65831		By MS/MS	By MS/MS	174500000	174500000	0	0	7.5361	0	83635000	90863000	0	11.852	9.9412
P19338;B3KM80;Q6ZS99;B3KTP9	351;177;244;274	P19338	P19338	Nucleolin	NCL		0.982853	17.7959	2.936e-05	78.692	63.134	70.488	0.886308	8.96887	0.000276169	60.255	0.976907	16.2845	2.936e-05	78.692	0.982853	17.7959	0.000111105	70.488		1	Y	LAVVDVRIGMTRKFGYVDFESAEDLEKALEL	X;X;X;X;X;X;X;X;X;X;X;X;X;X;X;B2;X;X;X;X;X;X;X;X;X;X;X;X;X;X;X	XXXXXXXXXXXXPPPPPPPPPPPPPPPXXXX	FGY(0.983)VD(0.016)FE(0.001)SAEDLEK	FGY(17.8)VD(-17.8)FE(-31.71)S(-38.16)AE(-52.68)D(-58.62)LE(-69.34)K(-70.49)	3	2	-3.9676	By MS/MS	By MS/MS	By MS/MS	524450000	524450000	0	0	0.4564	158900000	143680000	101090000	0.30483	0.44466	0.33177
G3V5P8;G3V3B2;B2R4P1;G3V4K0;O95406	91;114;114;130;114	G3V5P8	G3V5P8	Protein cornichon homolog 1	CNIH1;CNIH		0.632771	7.44758	2.93731e-05	59.537	49.88	59.537	0	0		NaN	0.632771	7.44758	2.93731e-05	59.537						1	Y	GLYDPTTIMNADILAYCQKEGWCKLAFYLLA	X;X;X;X;X;X;X;X;X;X;X;X;X;X;X;B2;X;X;X;X;X;X;X;X;X;X;X;X;X;X;X	PPPPPPPPPPPPPPPPPPPXXXXXXXXXXXX	PVMSGPGLYDPT(0.001)T(0.001)IM(0.018)N(0.018)AD(0.018)ILAY(0.633)C(0.099)Q(0.099)K(0.114)	PVM(-57.28)S(-57.28)GPGLY(-44.47)D(-37.57)PT(-29.57)T(-29.57)IM(-15.43)N(-15.43)AD(-15.43)ILAY(7.45)C(-8.07)Q(-8.07)K(-7.45)	22	3	-2.7286	By matching	By MS/MS		94957000	94957000	0	0	NaN	43162000	51794000	0	NaN	NaN	NaN
P22626;A0A384NL58;A0A024RA28	347;347;295	P22626	P22626	Heterogeneous nuclear ribonucleoproteins A2/B1	HNRNPA2B1;HNRPA2B1		0.783655	6.7386	2.93859e-05	59.197	54.649	59.197	0.783655	6.7386	2.93859e-05	59.197										1	Y	GGGNYGPGGSGGSGGYGGRSRY_________	X;X;X;X;X;X;X;X;X;X;X;X;X;X;X;B2;X;X;X;X;X;X;X;X;X;X;X;X;X;X;X	PPPPPPPPPPPPPPPPPPPXXXXXXXXXXXX	NMGGPYGGGNYGPGGS(0.002)GGS(0.049)GGY(0.784)GGR(0.166)	N(-54.43)M(-54.43)GGPY(-46.33)GGGN(-46.33)Y(-42.38)GPGGS(-26.84)GGS(-12.08)GGY(6.74)GGR(-6.74)	22	3	-1.2031	By MS/MS			463270000	463270000	0	0	2.5451	463270000	0	0	12.088	0	0
A0A024R8A7;Q96I24	53;53	A0A024R8A7	A0A024R8A7	Far upstream element-binding protein 3	hCG_31253;FUBP3		0.661039	5.88064	2.94635e-05	57.145	43.239	57.145	0.661039	5.88064	2.94635e-05	57.145	0.42695	0.576112	2.95796e-05	54.072	0.422064	0.243031	0.000122397	47.105		1	Y	HLNNSTPLVDPSVYGYGVQKRPLDDGVGNQL	X;X;X;X;X;X;X;X;X;X;X;X;X;X;X;B2;X;X;X;X;X;X;X;X;X;X;X;X;X;X;X	PPPPPPPPPPPPPPPPPPPPXXXXXXXXXXX	IDSIPHLNNSTPLVD(0.01)PS(0.017)VY(0.171)GY(0.661)GVQ(0.067)K(0.075)	ID(-54.95)S(-54.98)IPH(-54.21)LN(-47.67)N(-44.92)S(-41.91)T(-38.64)PLVD(-18.4)PS(-15.93)VY(-5.88)GY(5.88)GVQ(-9.97)K(-9.44)	21	3	-0.33378	By MS/MS			141810000	141810000	0	0	NaN	141810000	0	0	NaN	NaN	NaN
P31689;B7Z5C0;Q9NXZ8	381;224;224	P31689	P31689	DnaJ homolog subfamily A member 1	DNAJA1;HDJ2		0.724441	7.40023	3.10632e-05	65.472	58.581	65.472	0.50355	3.84197	0.000899678	50.806	0	0		NaN	0.724441	7.40023	3.10632e-05	65.472		1	Y	FDPNQERRRHYNGEAYEDDEHHPRGGVQCQT	X;X;X;X;X;X;X;X;X;X;X;X;X;X;X;B2;X;X;X;X;X;X;X;X;X;X;X;X;X;X;X	XXXXXXXXXPPPPPPPPPPPPPPPXXXXXXX	H(0.014)Y(0.014)N(0.094)GE(0.132)AY(0.724)E(0.018)D(0.004)D(0.001)EHHPR	H(-17.29)Y(-17.29)N(-8.87)GE(-7.4)AY(7.4)E(-15.99)D(-22.9)D(-29.58)E(-42.87)H(-48.22)H(-52.98)PR(-60.57)	7	4	-0.18412	By MS/MS	By matching	By MS/MS	61132000	61132000	0	0	0.88482	25191000	2324000	33616000	1.492	0.1045	1.1218
Q68D08;A0A024R9G4;Q9NUQ9;E5RI16	116;116;116;116	Q68D08	Q68D08	Protein FAM49B	DKFZp686B04128;FAM49B		0.906313	13.866	3.2496e-05	73.928	57.152	73.928	0.906313	13.866	3.2496e-05	73.928	0.665836	7.96033	6.01571e-05	62.765	0.779933	8.97689	0.000210773	49.721		1	Y	EAALRGLLGALTSTPYSPTQHLEREQALAKQ	X;X;X;X;X;X;X;X;X;X;X;X;X;X;X;B2;X;X;X;X;X;X;X;X;X;X;X;X;X;X;X	XXXXXPPPPPPPPPPPPPPPPPPPXXXXXXX	GLLGALT(0.009)S(0.009)T(0.037)PY(0.906)S(0.037)PTQHLER	GLLGALT(-19.83)S(-19.83)T(-13.87)PY(13.87)S(-13.87)PT(-35.01)Q(-40.95)H(-46.6)LE(-51.28)R(-50.94)	11	3	-0.60754	By MS/MS	By MS/MS	By MS/MS	1398800000	1398800000	0	0	NaN	362200000	374130000	256020000	NaN	NaN	NaN
A0A140VK29;Q9HCC0;D6RD67	365;365;137	A0A140VK29	A0A140VK29	Methylcrotonoyl-CoA carboxylase beta chain, mitochondrial	MCCC2		0.999913	41.6893	3.33819e-05	76.704	59.764	76.704	0.999913	41.6893	3.33819e-05	76.704					0.998114	29.0032	8.15713e-05	54.008		1	Y	FYGDTLVTGFARIFGYPVGIVGNNGVLFSES	X;X;X;X;X;X;X;X;X;X;X;X;X;X;X;B2;X;X;X;X;X;X;X;X;X;X;X;X;X;X;X	XXXXXXXXXXXXPPPPPPPPPPPPPPPPPPP	IFGY(1)PVGIVGNNGVLFSESAK	IFGY(41.69)PVGIVGN(-41.69)N(-47.23)GVLFS(-69.59)E(-72.54)S(-74.77)AK(-74.66)	4	3	-0.7657	By MS/MS		By MS/MS	100170000	100170000	0	0	NaN	48810000	0	21965000	NaN	NaN	NaN
Q6FGH9;P63167;Q96FJ2	50;50;50	Q6FGH9;Q96FJ2	Q6FGH9	Dynein light chain 1, cytoplasmic;Dynein light chain 2, cytoplasmic	DNCL1;DYNLL1;DYNLL2		0.499997	0	3.34101e-05	93.096	74.286	93.096	0.499997	0	3.34101e-05	93.096	0.499933	0	9.05277e-05	86.189	0.499987	0	7.91239e-05	87.568		1	Y	EKDIAAHIKKEFDKKYNPTWHCIVGRNFGSY;EKDIAAYIKKEFDKKYNPTWHCIVGRNFGSY	X;X;X;X;X;X;X;X;X;X;X;X;X;X;X;B2;X;X;X;X;X;X;X;X;X;X;X;X;X;B2;X	XXXXXXXXXXXXXXXPPPPPPPPPPPXXXXX	Y(0.5)N(0.5)PTWHCIVGR	Y(0)N(0)PT(-49.8)W(-63.56)H(-75.36)C(-84.7)IVGR(-93.1)	1	3	-0.69566	By MS/MS	By MS/MS	By MS/MS	232500000	232500000	0	0	5.4945	55456000	75745000	101290000	4.3628	5.1051	6.8599
A0A1W2PRV5;E7EQZ4;Q16637;I3QJX8;I6T6Y4;A0A0G2JRX5;I2E4T0;A0A0G2JQN8;I2E4T1;I3QJX9;A0A0G2JRY6;A0A076L8Z0	130;130;130;47;47;48;47;48;47;47;48;47	A0A1W2PRV5	A0A1W2PRV5	Survival motor neuron protein	SMN1;SMN2		0.749264	7.25032	3.38822e-05	95.642	68.595	95.642									0.749264	7.25032	3.38822e-05	95.642		1	Y	SIDFKRETCVVVYTGYGNREEQNLSDLLSPI	X;X;X;X;X;X;X;X;X;X;X;X;X;X;X;B2;X;X;X;X;X;X;X;X;X;X;X;X;X;X;X	XXXXXXPPPPPPPPPPPPPXXXXXXXXXXXX	ETCVVVYT(0.003)GY(0.749)GN(0.141)R(0.106)	E(-92.34)T(-92.34)C(-93.74)VVVY(-36.69)T(-23.37)GY(7.25)GN(-7.25)R(-8.49)	10	2	-0.88796			By MS/MS	20391000	20391000	0	0	4.8015	0	0	20391000	NaN	0	9.2919
Q8ND56;A0A140TA76;K7EMZ9;I3L4Q1	27;22;22;27	Q8ND56	Q8ND56	Protein LSM14 homolog A	LSM14A		0.804734	6.33076	3.45482e-05	73.11	44.711	73.11	0	0		NaN	0.708571	6.17849	7.51203e-05	65.295	0.804734	6.33076	3.45482e-05	73.11		1	Y	ISLISKAEIRYEGILYTIDTENSTVALAKVR	X;X;X;X;X;X;X;X;X;X;X;X;X;X;X;B2;X;X;X;X;X;X;X;X;X;X;X;X;X;X;X	XXXXXXXXXXPPPPPPPPPPPPPPPPPPPXX	Y(0.001)E(0.001)GILY(0.805)T(0.187)ID(0.001)T(0.002)E(0.002)NS(0.001)TVALAK	Y(-29.99)E(-29.99)GILY(6.33)T(-6.33)ID(-27.5)T(-26.98)E(-25.91)N(-32.27)S(-31.25)T(-37.47)VALAK(-54.66)	6	3	-0.97774	By matching	By MS/MS	By MS/MS	277270000	277270000	0	0	3.748	2245800	0	76198000	0.11207	0	2.7204
A0A6I8PIV1;B2RCM2;Q9P2J5;B4DER1;A0A6I8PIT3;A0A6I8PLB8;A0A6I8PRS0;B4E266;A0A6I8PL42;A0A6I8PLB3;A0A6I8PS05;A0A6I8PIP7;A0A6I8PTV8;A0A6I8PRU9;Q6NVI4	183;183;183;156;183;183;129;137;137;129;56;183;183;183;183	A0A6I8PIV1	A0A6I8PIV1	Leucine--tRNA ligase, cytoplasmic	LARS		0.948599	12.777	3.5586e-05	77.037	64.659	77.037	0.948599	12.777	3.5586e-05	77.037	0.942801	12.3155	6.33362e-05	70.114						1	Y	DEEIVKFSEAEHWLDYFPPLAIQDLKRMGLK	X;X;X;X;X;X;X;X;X;X;X;X;X;X;X;B2;X;X;X;X;X;X;X;X;X;X;X;X;X;X;X	XXXXXXPPPPPPPPPPPPPPPPPPPPXXXXX	FSEAEHW(0.001)LD(0.05)Y(0.949)FPPLAIQDLK	FS(-38.88)E(-39.46)AE(-40.04)H(-40.61)W(-30.02)LD(-12.78)Y(12.78)FPPLAIQ(-58.68)D(-59.44)LK(-64.73)	10	3	3.5279	By MS/MS	By MS/MS		300450000	300450000	0	0	0.26451	73444000	163330000	0	0.11412	0.61114	0
A0A087WZ13;E9PAU2	509;526	A0A087WZ13	A0A087WZ13		RAVER1		0.722079	7.30885	3.78475e-05	75.608	52.161	68.49	0.722079	7.30885	6.4132e-05	68.49	0.63332	5.62121	3.78475e-05	75.608						1	Y	LLGEPPKDYRIPLNPYLNLHSLLPASNLAGK	X;X;X;X;X;X;X;X;X;X;X;X;X;X;X;B2;X;X;X;X;X;X;X;X;X;X;X;X;X;X;X	XXXXXXXXXXPPPPPPPPPPPPPPPPPPPPP	IPLN(0.134)PY(0.722)LN(0.134)LH(0.007)S(0.002)LLPASNLAGK	IPLN(-7.31)PY(7.31)LN(-7.31)LH(-19.87)S(-25.33)LLPAS(-61.23)N(-61.07)LAGK(-64.69)	6	3	0.62491	By MS/MS	By MS/MS		137640000	137640000	0	0	NaN	68523000	69120000	0	NaN	NaN	NaN
A0A087WTT1;E7EQV3;B4DZW4;A0A024R9C1;P11940;E7ERJ7;B4DQX0;A0A024R9E2;B3KT93;H0YAR2;Q2VIP3;Q5VX58;Q3ZCS4;Q9H361;H0YB86;A0A6I8PS38;A0A6I8PLA1;Q4VXU2	339;319;319;364;364;332;332;364;364;233;364;364;364;364;55;113;108;364	A0A087WTT1	A0A087WTT1	Polyadenylate-binding protein;Polyadenylate-binding protein 1;Polyadenylate-binding protein 3;Polyadenylate-binding protein 1-like	PABPC1;PABPC3;PABPC1L		0.999999	60.3516	3.82059e-05	119.56	97.854	119.56	0.99997	45.594	0.000235956	104.8	0.999781	39.2976	0.000227434	98.503	0.999999	60.3516	3.82059e-05	119.56		1	Y	AVTEMNGRIVATKPLYVALAQRKEERQAHLT	X;X;X;X;X;X;X;X;X;X;X;X;X;X;X;B2;X;X;X;X;X;X;X;X;X;X;X;X;X;X;X	XXXXXXXXPPPPPPPPPPPPPPXXXXXXXXX	PLY(1)VALAQR	PLY(60.35)VALAQ(-60.35)R(-71.05)	3	2	-0.14908	By MS/MS	By MS/MS	By MS/MS	291250000	291250000	0	0	NaN	47396000	74924000	67198000	NaN	NaN	NaN
B1ANR0;Q6IQ30;Q13310;H0Y5F5;Q15164;Q53GL4;H0YEU6;Q147Y3;Q3B867;Q59GZ7	364;364;364;266;175;75;91;114;114;62	B1ANR0	B1ANR0	Polyadenylate-binding protein;Polyadenylate-binding protein 4	PABPC4		0.999999	60.3516	3.82059e-05	119.56	97.854	119.56	0.99997	45.594	0.000235956	104.8	0.999781	39.2976	0.000227434	98.503	0.999999	60.3516	3.82059e-05	119.56		1	Y	AVTEMNGRIVGSKPLYVALAQRKEERKAHLT	X;X;X;X;X;X;X;X;X;X;X;X;X;X;X;B2;X;X;X;X;X;X;X;X;X;X;X;X;X;X;X	XXXXXXXXXXXXXPPPPPPPPPXXXXXXXXX	PLY(1)VALAQR	PLY(60.35)VALAQ(-60.35)R(-71.05)	3	2	-0.14908	By MS/MS	By MS/MS	By MS/MS	242040000	242040000	0	0	NaN	47396000	74924000	67198000	NaN	NaN	NaN
Q6FGV9;Q15126	51;51	Q6FGV9	Q6FGV9	Phosphomevalonate kinase	PMVK		0.700695	6.71232	4.247e-05	93.623	74.523	93.623	0.700695	6.71232	4.247e-05	93.623	0.331239	0	0.0231622	81.338	0.332701	0	0.0056314	71.176		1	Y	DVCAVLRLSGPLKEQYAQEHGLNFQRLLDTS	X;X;X;X;X;X;X;X;X;X;X;X;X;X;X;B2;X;X;X;X;X;X;X;X;X;X;X;X;X;X;X	XXXXXXXXXXXXXPPPPPPPPPPPPPXXXXX	E(0.149)Q(0.149)Y(0.701)AQ(0.001)EHGLNFQR	E(-6.71)Q(-6.71)Y(6.71)AQ(-31.28)E(-45.63)H(-59.62)GLN(-85.84)FQ(-91.51)R(-92.68)	3	3	-0.0069371	By MS/MS			53410000	53410000	0	0	NaN	53410000	0	0	NaN	NaN	NaN
P31947	213	P31947	P31947	14-3-3 protein sigma	SFN		0.628646	6.11414	4.29345e-05	68.494	59.311	47.082	0.596931	5.84931	0.000398395	45.094	0.628646	6.11414	9.55087e-05	56.313	0.605116	5.17304	4.29345e-05	68.494		1	Y	FDEAMADLHTLSEDSYKDSTLIMQLLRDNLT	X;X;X;X;X;X;X;X;X;X;X;X;X;X;X;B2;X;X;X;X;X;X;X;X;X;X;X;X;X;X;X	PPPPPPPPPPPPPPPPPXXXXXXXXXXXXXX	TTFDEAMADLHTLS(0.004)E(0.014)D(0.045)S(0.154)Y(0.629)K(0.154)	T(-44.62)T(-44.62)FD(-41.12)E(-41.12)AM(-41.12)AD(-41.27)LH(-38.22)T(-34.7)LS(-21.5)E(-16.59)D(-11.46)S(-6.11)Y(6.11)K(-6.11)	18	4	0.60665	By MS/MS	By MS/MS	By matching	1159200000	1159200000	0	0	0.63977	595740000	452080000	66169000	1.2137	0.91508	0.080009
Q9UBK9;S4R2Z4	20;32	Q9UBK9	Q9UBK9	Protein UXT	UXT		0.738335	5.58009	4.49423e-05	91.701	69.93	61.593	0.490915	0	0.00025842	74.962	0.486178	0	0.000279447	73.666	0.738335	5.58009	4.49423e-05	91.701		1	Y	PKRRAVEATGEKVLRYETFISDVLQRDLRKV	X;X;X;X;X;X;X;X;X;X;X;X;X;X;X;B2;X;X;X;X;X;X;X;X;X;X;X;X;X;X;X	XXXXXXXXXXXXXXXPPPPPPPPPPPXXXXX	Y(0.738)E(0.204)T(0.057)FISDVLQR	Y(5.58)E(-5.58)T(-11.12)FIS(-33.77)D(-45.26)VLQ(-60.21)R(-61.59)	1	2	1.2006		By matching	By MS/MS	80785000	80785000	0	0	NaN	0	29996000	50789000	NaN	NaN	NaN
E5KNY5;P42704	1365;1365	E5KNY5	E5KNY5	Leucine-rich PPR motif-containing protein, mitochondrial	LRPPRC		0.942762	12.3826	4.52591e-05	60.747	41.967	57.806	0.869234	8.2643	7.18668e-05	60.747	0.942762	12.3826	4.52591e-05	57.806						1	Y	KLDDLFLKRYASLLKYAGEPVPFIEPPESFE	X;X;X;X;X;X;X;X;X;X;X;X;X;X;X;B2;X;X;X;X;X;X;X;X;X;X;X;X;X;X;X	XXXXXXXXXXXXXXXPPPPPPPPPPPPPPPP	Y(0.943)AGE(0.054)PVPFIE(0.003)PPESFEFYAQQLR	Y(12.38)AGE(-12.38)PVPFIE(-25.47)PPE(-43.04)S(-45.37)FE(-50.85)FY(-53.62)AQ(-55.19)Q(-55.19)LR(-55.16)	1	3	-0.38604	By MS/MS	By matching		53832000	53832000	0	0	0.44721	21748000	32084000	0	1.0941	1.3047	0
I3L3P7;B2R4W8;P62244;I3L246;A8K7H3;H3BN98	46;46;46;46;46;212	I3L3P7	I3L3P7	40S ribosomal protein S15a	RPS15A;hCG_1994130		0.861965	7.97755	4.53278e-05	102.52	78.533	87.863					0.861965	7.97755	6.33167e-05	87.863	0.499947	0	4.53278e-05	102.52		1	Y	SKVIVRFLTVMMKHGYIGEFEIIDDHRAGKI	X;X;X;X;X;X;X;X;X;X;X;X;X;X;X;B2;X;X;X;X;X;X;X;X;X;X;X;X;X;X;X	XXXXXXXXXXXXXPPPPPPPPPPPPPPXXXX	H(0.137)GY(0.862)IGE(0.001)FEIIDDHR	H(-7.98)GY(7.98)IGE(-30.83)FE(-56.04)IID(-75.33)D(-80.33)H(-85.93)R(-87.33)	3	3	2.5311		By MS/MS	By MS/MS	143140000	143140000	0	0	0.45	0	88671000	54467000	0	0.81507	0.45184
P61221	491	P61221	P61221	ATP-binding cassette sub-family E member 1	ABCE1		0.841624	10.0987	4.57192e-05	68.525	51.244	68.525	0.788546	6.75648	7.51203e-05	67.519	0.841624	10.0987	4.57192e-05	68.525	0	0		NaN		1	Y	LGKPADVYLIDEPSAYLDSEQRLMAARVVKR	X;X;X;X;X;X;X;X;X;X;X;X;X;X;X;B2;X;X;X;X;X;X;X;X;X;X;X;X;X;X;X	XXXPPPPPPPPPPPPPPPPPPPXXXXXXXXX	PADVY(0.001)LID(0.013)E(0.013)PS(0.082)AY(0.842)LD(0.026)S(0.007)E(0.005)Q(0.005)R(0.005)	PAD(-38.94)VY(-28.34)LID(-18.13)E(-18.13)PS(-10.1)AY(10.1)LD(-15.07)S(-20.85)E(-21.86)Q(-22.37)R(-21.9)	13	3	0.71282	By MS/MS	By MS/MS	By matching	297170000	297170000	0	0	2.7724	52097000	182090000	62980000	2.1679	5.3794	1.2773
A0A3B3IS57;A0A3B3IU45;B4DLA6;B3KMX0;A0A024R7U6;A0A3B3IT92;P33991;E5RG31;A0A3B3ITP6;A0A3B3IRR8	410;474;484;524;524;565;524;243;524;85	A0A3B3IS57	A0A3B3IS57	DNA replication licensing factor MCM4	MCM4		0.923067	11.2153	4.65088e-05	85.377	56.291	85.377	0.923067	11.2153	0.000228256	85.377	0.839906	7.99004	4.65088e-05	83.499	0	0		NaN		1	Y	CGDPGTSKSQLLQYVYNLVPRGQYTSGKGSS	X;X;X;X;X;X;X;X;X;X;X;X;X;X;X;B2;X;X;X;X;X;X;X;X;X;X;X;X;X;X;X	XXXXXXXXPPPPPPPPPPPPPXXXXXXXXXX	SQLLQ(0.001)Y(0.006)VY(0.923)N(0.07)LVPR(0.001)	S(-59.76)Q(-59.76)LLQ(-31.31)Y(-22.09)VY(11.22)N(-11.22)LVPR(-30.77)	8	2	-2.6723	By MS/MS	By MS/MS	By matching	32799000	32799000	0	0	2.2378	16601000	0	16197000	NaN	0	NaN
Q53XJ5;A0A384NLA0;A0A494C1N0;P26885	112;112;141;112	Q53XJ5	Q53XJ5	Peptidyl-prolyl cis-trans isomerase;Peptidyl-prolyl cis-trans isomerase FKBP2	FKBP2		0.757777	5.96044	4.67263e-05	94.692	72.07	87.298	0.718217	4.54172	4.67263e-05	94.692	0.757777	5.96044	0.000177609	87.298	0.688202	4.89779	8.48478e-05	92.538		1	Y	CEGEKRKLVIPSELGYGERGAPPKIPGGATL	X;X;X;X;X;X;X;X;X;X;X;X;X;X;X;B2;X;X;X;X;X;X;X;X;X;X;X;X;X;X;X	XXXXXXXPPPPPPPPPPPPXXXXXXXXXXXX	LVIPSE(0.002)LGY(0.758)GE(0.192)R(0.048)	LVIPS(-33.97)E(-25.65)LGY(5.96)GE(-5.96)R(-12)	9	2	-1.0556	By MS/MS	By MS/MS	By MS/MS	4559300000	4559300000	0	0	NaN	1181300000	1671200000	1495600000	NaN	NaN	NaN
A4QN18;Q9BV84;Q8N9G1;B4DY06;Q8N2P2;O15027;F1T0I1;A0A3F2YNX0;A0A3F2YNZ0	1820;322;199;34;34;2193;2193;2015;2015	A4QN18;O15027	O15027	Protein transport protein Sec16A	SEC16A		0.9939	22.1226	4.67263e-05	94.692	63.974	89.827	0.990687	20.2686	0.000136525	76.282	0.972857	15.5439	4.67263e-05	94.692	0.9939	22.1226	0.000132851	89.827		1	Y	PVNMYSRRAAGTRARYVDVLNPSGTQRSEPA	X;X;X;X;X;X;X;X;X;X;X;X;X;X;X;B2;X;X;X;X;X;X;X;X;X;X;X;X;X;X;X	XXXXXXXXXXXXXXXPPPPPPPPPPPPXXXX	Y(0.994)VD(0.006)VLNPSGTQR	Y(22.12)VD(-22.12)VLN(-54.56)PS(-75.71)GT(-80.47)Q(-86.85)R(-89.83)	1	2	0.2343	By MS/MS	By MS/MS	By MS/MS	83538000	83538000	0	0	NaN	28475000	23016000	32047000	NaN	NaN	NaN
Q9Y547;A6NIR2;X6R7Y7	67;67;67	Q9Y547	Q9Y547	Intraflagellar transport protein 25 homolog	HSPB11		0.885751	8.96109	4.67337e-05	94.692	70.662	94.692	0.885751	8.96109	4.67337e-05	94.692	0.476761	0	0.00186537	77.677	0	0		NaN		1	Y	CFHKHVRIERLVIQSYFVQTLKIEKSTSKEP	X;X;X;X;X;X;X;X;X;X;X;X;X;X;X;B2;X;X;X;X;X;X;X;X;X;X;X;X;X;X;X	XXXXXXXXXXPPPPPPPPPPPPXXXXXXXXX	LVIQ(0.002)S(0.113)Y(0.886)FVQTLK	LVIQ(-27.13)S(-8.96)Y(8.96)FVQ(-47.09)T(-54.34)LK(-64.44)	6	2	-0.048087	By MS/MS			180490000	180490000	0	0	3.1111	180490000	0	0	11.063	0	0
Q7Z531;Q7Z4Y4;Q9UIJ7;B3KWD9	73;85;85;15	Q7Z531	Q7Z531	GTP:AMP phosphotransferase AK3, mitochondrial	AK3		0.608517	5.95958	4.69347e-05	93.258	69.103	93.258	0	0		NaN	0.420949	0	0.000109377	68.277	0.608517	5.95958	4.69347e-05	93.258		1	Y	VMTRLALHELKNLTQYSWLLDGFPRTLPQAE	X;X;X;X;X;X;X;X;X;X;X;X;X;X;X;B2;X;X;X;X;X;X;X;X;X;X;X;X;X;X;X	XXXXXXXXXXXPPPPPPPPPPPPPPXXXXXX	N(0.057)LT(0.154)Q(0.084)Y(0.609)S(0.084)W(0.012)LLDGFPR	N(-10.26)LT(-5.96)Q(-8.6)Y(5.96)S(-8.6)W(-17.11)LLD(-49.49)GFPR(-81.2)	5	2	-2.0879	By matching		By MS/MS	171450000	171450000	0	0	NaN	70349000	0	101100000	NaN	NaN	NaN
A0A024R7T3;P52597;B4DKS8	272;272;195	A0A024R7T3	A0A024R7T3	Heterogeneous nuclear ribonucleoprotein F;Heterogeneous nuclear ribonucleoprotein F, N-terminally processed	HNRPF;HNRNPF		0.565602	4.82024	4.72785e-05	90.108	84.005	67.118	0.565602	4.82024	0.000133605	67.118	0.429349	0	4.72785e-05	90.108	0.543622	2.72262	0.000230297	80.102		1	Y	TDLFGRDLSYCLSGMYDHRYGDSEFTVQSTT	X;X;X;X;X;X;X;X;X;X;X;X;X;X;X;B2;X;X;X;B2;X;X;X;X;X;X;X;X;X;X;X	XXXXXXPPPPPPPPPPPPPXXXXXXXXXXXX	DLSYCLS(0.003)GM(0.186)Y(0.566)D(0.186)H(0.047)R(0.012)	D(-55.2)LS(-48.71)Y(-49.02)C(-47.83)LS(-23.52)GM(-4.82)Y(4.82)D(-4.82)H(-10.82)R(-16.65)	10	3	-0.52326	By MS/MS	By matching	By MS/MS	354610000	354610000	0	0	1.1775	145430000	170930000	0	1.8001	1.6231	0
Q8TBK5;Q8N5Z7;B2R4K7;A0A024RBK3;Q02878;Q9HBB3;F8VZ45;U3KQR5;F8VR69	115;115;115;115;115;115;115;115;4	Q8TBK5	Q8TBK5	60S ribosomal protein L6	RPL6		0.982695	17.5426	4.76045e-05	117.39	94.558	107.29	0.96496	14.3997	0.000233999	103.35	0.975363	15.9759	4.76045e-05	117.39	0.982695	17.5426	7.92545e-05	110.67		1	Y	KNGGTRVVKLRKMPRYYPTEDVPRKLLSHGK	X;X;X;X;X;X;X;X;X;X;X;X;X;X;X;B2;X;X;X;X;X;X;X;X;X;X;X;X;X;X;X	XXXXXXXXXXXXXXXPPPPPPPPPXXXXXXX	Y(0.983)Y(0.017)PTEDVPR	Y(17.54)Y(-17.54)PT(-62.21)E(-67.34)D(-77.11)VPR(-107.29)	1	2	-1.408	By MS/MS	By MS/MS	By MS/MS	914740000	914740000	0	0	10.372	196940000	200980000	243810000	8.9181	5.9781	7.505
Q53HJ4;B2R7C5;A0A0S2Z4T1;P25205;A0A0S2Z492;Q8NHX6;J3KQ69;B4DUQ9;A0A499FHX9;B4DS46	456;456;456;456;456;456;410;410;466;397	Q53HJ4	Q53HJ4	DNA helicase;DNA replication licensing factor MCM3	MCM3;HCC5		0.814115	6.42347	4.82486e-05	82.645	62.858	82.645					0.814115	6.42347	4.82486e-05	82.645						1	Y	RLNARCSVLAAANPVYGRYDQYKTPMENIGL	X;X;X;X;X;X;X;X;X;X;X;X;X;X;X;B2;X;X;X;X;X;X;X;X;X;X;X;X;X;X;X	XXXXXPPPPPPPPPPPPPXXXXXXXXXXXXX	CSVLAAANPVY(0.814)GR(0.185)	C(-81.68)S(-81.68)VLAAAN(-33.23)PVY(6.42)GR(-6.42)	11	2	-0.89958		By MS/MS		0	0	0	0	NaN	0	0	0	NaN	NaN	NaN
P46109	127	P46109	P46109	Crk-like protein	CRKL		0.56009	3.20023	4.93061e-05	50.945	36.485	50.945	0.56009	3.20023	4.93061e-05	50.945										1	Y	SVSAPNLPTAEDNLEYVRTLYDFPGNDAEDL	X;X;X;X;X;X;X;X;X;X;X;X;X;X;X;B2;X;X;B2;X;X;X;X;X;X;X;X;X;X;X;X	PPPPPPPPPPPPPPPPPPXXXXXXXXXXXXX	YPSPPMGSVSAPNLPTAE(0.001)D(0.004)N(0.02)LE(0.268)Y(0.56)VR(0.147)	Y(-50.14)PS(-50.14)PPM(-50.14)GS(-50.18)VS(-46.08)APN(-42.33)LPT(-36.27)AE(-27.15)D(-21.62)N(-14.46)LE(-3.2)Y(3.2)VR(-5.82)	23	3	-0.69207	By MS/MS			55929000	55929000	0	0	NaN	55929000	0	0	NaN	NaN	NaN
Q59GY2;P36578;B4DMJ6;B4DFI6;H3BM89;B4DMJ2;H3BTP7	136;122;122;122;28;11;122	Q59GY2	Q59GY2	60S ribosomal protein L4	RPL4		0.996814	27.9793	5.25109e-05	74.46	51.72	74.46	0.987986	23.9387	0.000431009	48.659	0.996814	27.9793	5.25109e-05	74.46	0	0		NaN		1	Y	TWRRWHRRVNTTQKRYAICSALAASALPALV	X;X;X;X;X;X;X;X;X;X;X;X;X;X;X;B2;X;X;X;X;X;X;X;X;X;X;X;X;X;X;X	XXXXXXXXXXXXXXXPPPPPPPPPPPPPPPP	Y(0.997)AIC(0.002)S(0.002)ALAASALPALVMSK	Y(27.98)AIC(-27.98)S(-27.98)ALAAS(-49.74)ALPALVM(-72.88)S(-74.33)K(-74.46)	1	2	-1.0987	By MS/MS	By MS/MS	By matching	142480000	142480000	0	0	2.8051	25178000	52925000	35099000	0.91232	4.3485	3.184
H7BXR3;C9J3W4;C9JL62;C9IZ89;O94875;H7BZK1;B7Z3D7	118;72;72;72;72;16;135	H7BXR3;O94875	O94875	Sorbin and SH3 domain-containing protein 2	SORBS2		0.882806	8.82938	5.51099e-05	72.421	57.742	66.325	0.882806	8.82938	7.68454e-05	66.325	0.86906	8.22147	5.51099e-05	72.421	0.499741	0	0.000868508	64.265		1	Y	SSEEEKRVTVIKAPHYPGIGPVDESGIPTAI	X;X;X;X;X;X;X;X;X;X;X;X;X;X;X;B2;X;X;X;X;X;X;X;X;X;X;X;X;X;X;X	XXXXXXXXXXXXPPPPPPPPPPPPPPPPPPP	APH(0.116)Y(0.883)PGIGPVD(0.001)ESGIPTAIR	APH(-8.83)Y(8.83)PGIGPVD(-28.05)E(-36.69)S(-44.73)GIPT(-63.23)AIR(-63.18)	4	3	1.8682	By MS/MS	By MS/MS		420830000	420830000	0	0	NaN	154960000	265870000	0	NaN	NaN	NaN
A4QPB0;A0A024RC65;P46940;H0YLE8;A0A0J9YXZ5;Q6P1N4;Q5FWG8;Q05DN7;A0A087X225;B4E2M0	17;17;17;17;17;17;17;17;13;17	A4QPB0;B4E2M0	A4QPB0	Ras GTPase-activating-like protein IQGAP1	IQGAP1;hCG_1991735		0.995409	25.3918	5.65247e-05	93.111	65.996	79.148	0.995409	25.3918	0.00032546	79.148	0.9673	15.0664	0.000404539	76.228	0.989809	20.4674	5.65247e-05	93.111		1	Y	SAADEVDGLGVARPHYGSVLDNERLTAEEMD	X;X;X;X;X;X;X;X;X;X;X;X;X;X;X;B2;X;X;X;X;X;X;X;X;X;X;X;X;X;X;X	XXXXXXXXXXXXXPPPPPPPPPPPXXXXXXX	PH(0.002)Y(0.995)GS(0.003)VLDNER	PH(-27.7)Y(25.39)GS(-25.39)VLD(-46.83)N(-57.06)E(-55.72)R(-62.21)	3	2	-0.068966	By MS/MS	By MS/MS	By MS/MS	107960000	107960000	0	0	11.281	42326000	25581000	40056000	14.098	7.5729	12.555
A6NLN1;A0A0U1RRM4;P26599;Q59H49;K7EKJ7;K7EK45;A0A087WU68	163;224;193;210;190;18;65	A6NLN1	A6NLN1	Polypyrimidine tract-binding protein 1	PTBP1		0.946436	15.8289	5.69624e-05	70.501	55.625	70.501	0.518486	3.12412	7.19108e-05	66.308	0.946436	15.8289	5.69624e-05	70.501						1	Y	AGQSPVLRIIVENLFYPVTLDVLHQIFSKFG	X;X;X;X;X;X;X;X;X;X;X;X;X;X;X;B2;X;X;X;X;X;X;X;X;X;X;X;X;X;X;X	XXXXXXXXPPPPPPPPPPPPPPPPPPPPPXX	IIVE(0.025)N(0.022)LFY(0.946)PVT(0.002)LD(0.004)VLHQIFSK	IIVE(-15.83)N(-16.28)LFY(15.83)PVT(-27.17)LD(-23.41)VLH(-34.45)Q(-42.44)IFS(-51.69)K(-51.26)	8	3	-0.66998	By MS/MS	By MS/MS		5061200000	5061200000	0	0	1.8575	4101000000	960230000	0	7.0244	0.44851	NaN
A0A384NL63;P51991;B4E3E6;B4DDB6;B4E036;Q8NFG3;H7C1J8;Q66K53	373;373;318;351;134;58;110;184	A0A384NL63	A0A384NL63	Heterogeneous nuclear ribonucleoprotein A3	HNRNPA3;HNRPA3		0.821164	7.40097	5.76847e-05	75.574	68.915	75.574	0.821164	7.40097	5.76847e-05	75.574					0	0		NaN		1	Y	SPYGGGYGSGGGSGGYGSRRF__________	X;X;X;X;X;X;X;X;X;X;X;X;X;X;X;B2;X;X;X;X;X;X;X;X;X;X;X;X;X;X;X	PPPPPPPPPPPPPPPPPPPXXXXXXXXXXXX	SSGSPYGGGYGSGGGS(0.005)GGY(0.821)GS(0.149)R(0.024)	S(-71.51)S(-71.51)GS(-67.79)PY(-63.55)GGGY(-52.97)GS(-40.75)GGGS(-21.75)GGY(7.4)GS(-7.4)R(-15.36)	19	2	0.93936	By MS/MS			105640000	105640000	0	0	1.2623	105640000	0	0	6.7676	0	0
A0A140VK41;P11908;B2R860;H7C540;B1ALA9;Q53FW2;P60891;B7ZB02	314;311;311;166;278;311;311;107	A0A140VK41;B1ALA9	B1ALA9	Ribose-phosphate pyrophosphokinase 2;Ribose-phosphate pyrophosphokinase 1	PRPS2;PRPS1		0.911383	14.9461	5.77364e-05	61.641	45.699	59.513	0.826514	7.14031	0.000153171	61.641	0.775663	6.95546	0.000508394	54.501	0.911383	14.9461	5.77364e-05	59.513		1	Y	LAEAIRRTHNGESVSYLFSHVPL________	X;X;X;X;X;X;X;X;X;X;X;X;X;X;X;B2;X;X;X;X;X;X;X;X;X;X;X;X;X;X;X	XXXXXXPPPPPPPPPPPPPPPPPXXXXXXXX	RTHNGES(0.001)VS(0.029)Y(0.911)LFS(0.029)H(0.029)VPL	R(-42.23)T(-42.23)H(-42.23)N(-42.63)GE(-34.98)S(-32.02)VS(-14.95)Y(14.95)LFS(-14.95)H(-14.95)VPL	10	4	0.52392	By matching	By MS/MS	By MS/MS	335090000	335090000	0	0	2.0529	96388000	0	211980000	2.2264	0	3.2014
Q59H57;B4DR70;A8K4H1;Q8TBR3;Q6IBQ5;Q13344;P35637;H3BPE7	242;397;467;468;468;471;468;469	Q59H57	Q59H57	RNA-binding protein FUS	FUS		0.583756	5.25101	5.8091e-05	64.68	62.427	64.68	0.583756	5.25101	5.8091e-05	64.68					0	0		NaN		1	Y	DGPGGGPGGSHMGGNYGDDRRGGRGGYDRGG	X;X;X;X;X;X;X;X;X;X;X;X;X;X;X;B2;X;X;X;X;X;X;X;X;X;X;X;X;X;X;X	PPPPPPPPPPPPPPPPPPPPXXXXXXXXXXX	APKPDGPGGGPGGS(0.001)H(0.003)M(0.011)GGN(0.138)Y(0.584)GD(0.174)D(0.042)R(0.047)	APK(-61.49)PD(-56.52)GPGGGPGGS(-28.76)H(-22.49)M(-17.4)GGN(-6.26)Y(5.25)GD(-5.25)D(-11.41)R(-10.93)	20	3	-0.22865	By MS/MS		By matching	128430000	128430000	0	0	0.65414	40886000	0	87543000	0.82589	0	2.1852
B4DY28;A0A384P5K2;P21291;Q9BTA4;B3KVC9;Q6ZMS3;B4E2T4;E9PND2;E9PS42;Q59EQ5;Q6AI18;E9PP21	127;127;127;102;104;125;127;90;127;126;89;94	B4DY28	B4DY28	Cysteine and glycine-rich protein 1	CSRP1;DKFZp686M148		0.98915	20.5255	5.80919e-05	88.364	71.588	88.364	0.934635	14.2288	0.00126504	62.869	0.966543	15.0168	0.00126504	62.869	0.98915	20.5255	5.80919e-05	88.364		1	Y	KIGGSERCPRCSQAVYAAEKSWHKACFRCAK	X;X;X;X;X;X;X;X;X;X;X;X;X;X;X;B2;X;X;X;X;X;X;X;X;X;X;X;X;X;X;X	XXXXXXXXXXPPPPPPPPPPXXXXXXXXXXX	CSQAVY(0.989)AAE(0.009)K(0.002)	C(-72.75)S(-72.75)Q(-60.19)AVY(20.53)AAE(-20.53)K(-26.76)	6	2	-0.72372	By MS/MS	By MS/MS	By MS/MS	958530000	958530000	0	0	20.23	158660000	264310000	388570000	21.539	13.425	19.116
V9HW63;Q13162;A6NG45	54;54;54	V9HW63	V9HW63	Peroxiredoxin-4	HEL-S-97n;PRDX4		0.875995	10.4889	5.81939e-05	71.428	65.648	71.428									0.875995	10.4889	5.81939e-05	71.428		1	Y	ETEERPRTREEECHFYAGGQVYPGEASRVSV	X;X;X;X;X;X;X;X;X;X;X;X;X;X;X;B2;X;X;X;X;X;X;X;X;X;X;X;X;X;X;X	XXXXXXXPPPPPPPPPPPPPPPPPPPPPXXX	T(0.003)R(0.003)E(0.003)E(0.003)E(0.008)C(0.024)H(0.078)FY(0.876)AGGQ(0.003)VY(0.001)PGEASR	T(-25.06)R(-25.06)E(-25.06)E(-25.44)E(-20.57)C(-15.58)H(-10.49)FY(10.49)AGGQ(-25.44)VY(-31.92)PGE(-42.31)AS(-47.52)R(-52.66)	9	4	-1.4005			By MS/MS	66657000	66657000	0	0	0.5126	0	0	66657000	0	0	1.4324
O43324;H0YAL7;D6RBD7;C9J1V9;D6RCQ0	59;46;59;59;71	O43324	O43324	Eukaryotic translation elongation factor 1 epsilon-1	EEF1E1;EEF1E1-BLOC1S5		0.890879	9.11914	6.04914e-05	111.31	84.711	87.667	0.5	0	6.04914e-05	111.31	0.890879	9.11914	7.83021e-05	106.88	0.499993	0	0.0380084	77.049		1	Y	LTTIAAHLVKQANKEYLLGSTAEEKAIVQQW	X;X;X;X;X;X;X;X;X;X;X;X;X;X;X;B2;X;X;X;X;X;X;X;X;X;X;X;X;X;X;X	XXXXXXXXXXXXXXPPPPPPPPPPPXXXXXX	E(0.109)Y(0.891)LLGSTAEEK	E(-9.12)Y(9.12)LLGS(-63.99)T(-69.53)AE(-81.82)E(-86.34)K(-86.93)	2	3	-0.53921	By MS/MS	By MS/MS	By MS/MS	440180000	440180000	0	0	4.7719	132280000	118680000	143390000	5.6588	3.5827	4.0117
B7Z871;A0A087WZF1;B7ZLW0;Q93052;B7Z8W0	301;442;464;464;317	B7Z871	B7Z871	Lipoma-preferred partner	LPP		0.947641	14.2434	6.28272e-05	61.524	55.229	61.524					0	0		NaN	0.947641	14.2434	6.28272e-05	61.524		1	Y	NKLRGQPFYAVEKKAYCEPCYINTLEQCNVC	X;X;X;X;X;X;X;X;X;X;X;X;X;X;X;B2;X;X;X;X;X;X;X;X;X;X;X;X;X;X;X	XXXXXXXXXXXXXXPPPPPPPPPPPPPPPPP	AY(0.948)C(0.036)E(0.008)PC(0.002)Y(0.002)IN(0.002)T(0.002)LE(0.001)QCNVCSKPIMER	AY(14.24)C(-14.24)E(-20.84)PC(-26.71)Y(-26.71)IN(-26.71)T(-26.71)LE(-32.57)Q(-37.46)C(-42.03)N(-46.26)VC(-50)S(-55.3)K(-55.16)PIM(-61.39)E(-61.37)R(-61.52)	2	3	-0.97423		By matching	By MS/MS	25355000	25355000	0	0	NaN	0	11294000	14062000	NaN	NaN	NaN
C9J3F7;D4Q8H0;Q9NYL2	31;31;31	C9J3F7	C9J3F7	Mitogen-activated protein kinase kinase kinase MLT	ZAK;pk		0.796537	6.79158	6.34083e-05	70.094	67.45	70.094	0.524892	1.44806	8.93339e-05	52.318	0.796537	6.79158	6.34083e-05	70.094						1	Y	LQFFENCGGGSFGSVYRAKWISQDKEVAVKK	X;X;X;X;X;X;X;X;X;X;X;X;X;X;X;B2;X;X;X;X;X;X;X;X;X;X;X;X;X;X;X	PPPPPPPPPPPPPPPPPXXXXXXXXXXXXXX	FDDLQFFENCGGGSFGS(0.037)VY(0.797)R(0.167)	FD(-68)D(-67.13)LQ(-62.2)FFE(-59.04)N(-59.04)C(-59.04)GGGS(-39.12)FGS(-13.38)VY(6.79)R(-6.79)	19	3	-3.1213	By MS/MS	By MS/MS		60678000	60678000	0	0	NaN	20721000	39957000	0	NaN	NaN	NaN
A8K5I0;A0A1U9X7W4;A0A0G2JIW1;Q59EJ3;P0DMV9;P0DMV8;B4DNT8;B4DWK5;B4DI39;Q9UQC1	115;115;116;183;115;115;91;97;92;29	A8K5I0	A8K5I0	Heat shock 70 kDa protein 1B;Heat shock 70 kDa protein 1A	HEL-S-103;HSPA1B;HSPA1A;HSP70-1		0.999328	31.9202	6.47326e-05	73.887	59.22	73.887	0.994522	23.2222	0.0017417	49.188	0.997358	27.0066	0.000182342	59.709	0.999328	31.9202	6.47326e-05	73.887		1	Y	KPKVQVSYKGETKAFYPEEISSMVLTKMKEI	X;X;X;X;X;X;X;X;X;X;X;X;X;X;X;B2;X;X;X;X;X;X;X;X;X;X;X;X;X;X;X	XXXXXXXXXXXXXPPPPPPPPPPPPPPXXXX	AFY(0.999)PE(0.001)EISSMVLTK	AFY(31.92)PE(-31.92)E(-45.8)IS(-56.63)S(-61.09)M(-61.6)VLT(-72.52)K(-72.47)	3	3	-0.95292	By MS/MS	By MS/MS	By MS/MS	66668000	66668000	0	0	NaN	12511000	24465000	29692000	NaN	NaN	NaN
A0A024QYX3;P98179	129;129	A0A024QYX3	A0A024QYX3	RNA-binding protein 3	RBM3		0.964296	14.5599	6.47973e-05	87.435	70.109	87.435					0.964296	14.5599	6.47973e-05	87.435	0.834603	7.08707	0.00116845	64.265		1	Y	SGRYYDSRPGGYGYGYGRSRDYNGRNQGGYD	X;X;X;X;X;X;X;X;X;X;X;X;X;X;X;B2;X;X;X;X;X;X;X;X;X;X;X;X;X;B2;X	XXXPPPPPPPPPPPPPPPXXXXXXXXXXXXX	PGGYGY(0.002)GY(0.964)GR(0.034)	PGGY(-59.7)GY(-26.93)GY(14.56)GR(-14.56)	8	2	0.18956		By MS/MS	By MS/MS	745950000	745950000	0	0	10.994	0	355380000	350420000	0	14.714	13.533
Q6FHH6;Q53TN2;A0A024R3Z5;O43813;B2R602;H7C2E3	358;358;370;358;358;117	Q6FHH6	Q6FHH6	LanC-like protein 1	LANCL1		0.798153	6.78584	6.48895e-05	72.681	68.29	72.681					0.798153	6.78584	6.48895e-05	72.681						1	Y	KYLYRACKFAEWCLEYGEHGCRTPDTPFSLF	X;X;X;X;X;X;X;X;X;X;X;X;X;X;X;B2;X;X;X;X;X;X;X;X;X;X;X;X;X;X;X	XXXXXXXXPPPPPPPPPPPPPPXXXXXXXXX	FAE(0.003)W(0.013)C(0.017)LE(0.167)Y(0.798)GE(0.001)HGCR	FAE(-24.15)W(-17.81)C(-16.78)LE(-6.79)Y(6.79)GE(-27.69)H(-37.66)GC(-47.64)R(-51.64)	8	3	-0.15043		By MS/MS		88584000	88584000	0	0	0.19285	0	88584000	0	0	0.51656	0
Q6IPN0;F8W914;Q53SY1;A6XGP7;H7C106;D6W5C2;A0A0U1RQR6;Q3LIF4;Q9NQC3	242;244;86;98;115;133;65;414;1091	Q6IPN0;Q9NQC3	Q6IPN0	Reticulon;Reticulon-4	RTN4;NOGOC;Nbla00271		0.699599	7.09528	6.48943e-05	85.28	74.737	77.185	0.478539	0	6.48943e-05	72.662	0.496583	0	8.03988e-05	85.28	0.699599	7.09528	6.48943e-05	77.185		1	Y	YLESEVAISEELVQKYSNSALGHVNCTIKEL	B2;X;X;X;X;X;X;X;X;X;X;X;X;X;X;B2;X;X;X;X;X;X;X;X;X;X;X;X;X;X;X	XXXXXXXXXXXXXXXPPPPPPPPPPPPPPXX	Y(0.7)S(0.137)N(0.137)S(0.027)ALGHVNCTIK	Y(7.1)S(-7.1)N(-7.1)S(-14.09)ALGH(-44.69)VN(-68.39)C(-71.18)T(-73.57)IK(-75.43)	1	2	-0.28366			By MS/MS	41592000	41592000	0	0	1.0748	0	0	41592000	0	0	3.1019
A0A024R7C7;Q12906;F4ZW64;A8K590;F4ZW65;B4DFG4;B4DDF3;F4ZW66	579;579;579;579;583;383;177;583	A0A024R7C7;F4ZW66	F4ZW66	Interleukin enhancer-binding factor 3	ILF3		1	85.6549	6.57148e-05	87.308	51.952	87.308	1	66.2176	0.000808934	69.628	1	85.6549	6.57148e-05	87.308	0.999999	63.5129	0.00102858	66.351		1	Y	QKFQGAGSNKKVAKAYAALAALEKLFPDTPL	X;X;X;X;X;X;X;X;X;X;X;X;X;X;X;B2;X;X;X;X;X;X;X;X;X;X;X;X;X;X;X	XXXXXXXXXXXXXXPPPPPPPPPPXXXXXXX	AY(1)AALAALEK	AY(85.65)AALAALE(-85.65)K(-87.31)	2	2	-0.91956	By MS/MS	By MS/MS	By MS/MS	114920000	114920000	0	0	1.8092	35122000	37605000	42192000	1.4934	1.8527	2.1414
G3V583;Q8N128	107;139	G3V583	G3V583	Protein FAM177A1	FAM177A1		0.759059	8.97309	6.57148e-05	87.308	77.076	87.308					0.668029	6.64355	0.000464634	75.378	0.759059	8.97309	6.57148e-05	87.308		1	Y	VLGISTPKYQYAIDEYYRMKKEEEEEEEENR	X;X;X;X;X;X;X;X;X;X;X;X;X;X;X;B2;X;X;X;X;X;X;X;X;X;X;X;X;X;X;X	XXXXXXXXPPPPPPPPPPXXXXXXXXXXXXX	YQYAID(0.009)E(0.068)Y(0.759)Y(0.068)R(0.096)	Y(-82.62)Q(-82.62)Y(-63.54)AID(-19.31)E(-10.48)Y(8.97)Y(-10.48)R(-8.97)	8	2	-0.78146		By MS/MS	By MS/MS	40663000	40663000	0	0	NaN	0	15493000	25169000	NaN	NaN	NaN
Q6IPN0;F8W914	161;163	Q6IPN0	Q6IPN0	Reticulon	RTN4		0.878786	9.13262	6.61203e-05	91.549	71.029	91.549					0.878786	9.13262	6.61203e-05	91.549	0.743177	7.36114	0.00183248	56.359		1	Y	PKRRGSSGSVVVDLLYWRDIKKTGVVFGASL	X;X;X;X;X;X;X;X;X;X;X;X;X;X;X;B2;X;X;X;X;X;X;X;X;X;X;X;X;X;X;X	XXXXPPPPPPPPPPPPPPXXXXXXXXXXXXX	GSSGSVVVDLLY(0.879)W(0.107)R(0.014)	GS(-81.66)S(-82.06)GS(-77.31)VVVD(-37.98)LLY(9.13)W(-9.13)R(-18.05)	12	2	-0.41015		By MS/MS	By MS/MS	132070000	132070000	0	0	NaN	0	64508000	52063000	NaN	NaN	NaN
K9JA46;P07900;Q8TBA7;O75322;Q96HX7	604;604;510;411;294	K9JA46	K9JA46	Heat shock protein HSP 90-alpha	EL52;HSP90AA1		0.68763	6.68513	6.63556e-05	67.866	62.382	67.866	0	0		NaN	0.68763	6.68513	6.63556e-05	67.866	0.171336	0	0.00543458	42.317		1	Y	SNRLVTSPCCIVTSTYGWTANMERIMKAQAL	X;X;X;X;X;X;X;X;X;X;X;X;X;X;X;B2;X;X;X;X;X;X;X;X;X;X;X;X;X;X;X	XXXPPPPPPPPPPPPPPPPPPPPPXXXXXXX	LVT(0.026)S(0.023)PC(0.023)C(0.023)IVT(0.034)S(0.034)T(0.148)Y(0.688)GW(0.002)TANMER	LVT(-14.24)S(-14.83)PC(-14.83)C(-14.83)IVT(-13.03)S(-13.03)T(-6.69)Y(6.69)GW(-25.16)T(-31.41)AN(-41.12)M(-43.32)E(-42.66)R(-45.23)	13	3	-1.1642	By matching	By MS/MS		386760000	386760000	0	0	2.2675	204520000	182250000	0	3.9477	5.1796	0
A0A0S2Z4Q3;A0A0S2Z4K2;P62633	68;75;75	A0A0S2Z4Q3	A0A0S2Z4Q3	Cellular nucleic acid-binding protein	CNBP		0.888939	9.65332	6.65305e-05	77.379	76.674	77.379	0.888939	9.65332	6.65305e-05	77.379	0.810419	7.34644	0.000264403	57.434	0.780704	7.34644	0.000264403	57.434		1	Y	SGHLAKDCDLQEDACYNCGRGGHIAKDCKEP	X;X;X;X;X;X;X;X;X;X;X;X;X;X;X;B2;X;X;X;X;X;X;X;X;X;X;X;X;X;X;X	XXXXXXPPPPPPPPPPPPPPXXXXXXXXXXX	DCDLQED(0.001)AC(0.096)Y(0.889)N(0.009)C(0.002)GR(0.003)	D(-62.37)C(-62.37)D(-54.23)LQ(-42.58)E(-35.84)D(-28.03)AC(-9.65)Y(9.65)N(-20.03)C(-27.1)GR(-25.45)	10	2	-0.43462	By MS/MS	By MS/MS	By MS/MS	490440000	490440000	0	0	0.91717	70801000	70210000	86520000	0.64521	0.32483	0.41425
P19338;B3KM80;Q6ZS99;B3KTP9;H7BY16;Q9BQ02	525;351;418;448;150;297	P19338	P19338	Nucleolin	NCL		0.999691	35.558	6.69977e-05	64.104	49.437	64.104	0.999691	35.558	6.69977e-05	64.104					0.993606	22.2975	0.00062159	50.843		1	Y	TFIKVPQNQNGKSKGYAFIEFASFEDAKEAL	X;X;X;X;X;X;X;X;X;X;X;X;X;X;X;B2;X;X;X;X;X;X;X;X;X;X;X;X;X;X;X	XXXXXXXXXXXXXXPPPPPPPPPPPPPPXXX	GY(1)AFIEFASFEDAK	GY(35.56)AFIE(-35.56)FAS(-45.69)FE(-56.13)D(-59.63)AK(-64.1)	2	3	-3.5723	By MS/MS		By MS/MS	19871000	19871000	0	0	NaN	8779200	0	11092000	NaN	NaN	NaN
Q9BQ69	232	Q9BQ69	Q9BQ69	O-acetyl-ADP-ribose deacetylase MACROD1	MACROD1		0.929158	14.5373	6.73266e-05	55.988	42.179	55.988	0.897301	10.787	6.73266e-05	55.128	0.918828	12.7409	0.000175876	46.808	0.929158	14.5373	6.80209e-05	55.988		1	Y	RLPAKYVIHTVGPIAYGEPSASQAAELRSCY	X;X;X;X;X;X;X;X;X;X;X;X;X;X;X;B2;X;X;X;X;X;X;X;X;X;X;X;X;X;X;X	XXXXXPPPPPPPPPPPPPPPPPPPPPPPXXX	Y(0.004)VIH(0.008)T(0.025)VGPIAY(0.929)GE(0.033)PS(0.001)ASQAAELR	Y(-23.27)VIH(-20.8)T(-15.67)VGPIAY(14.54)GE(-14.54)PS(-32.07)AS(-38.76)Q(-39.93)AAE(-42.62)LR(-49.34)	11	3	-1.0576	By MS/MS	By MS/MS	By MS/MS	258710000	258710000	0	0	3.1175	81451000	84157000	93104000	4.3711	3.8523	2.1903
A0A024R4A5;I1E4Y6;Q6Y7W6	1177;1199;1177	A0A024R4A5	A0A024R4A5	PERQ amino acid-rich with GYF domain-containing protein 2	TNRC15;GIGYF2		0.999983	47.8944	7.03149e-05	86.67	63.147	86.67	0.999983	47.8944	7.03149e-05	86.67	0	0		NaN	0.99994	42.6431	0.000258328	80.455		1	Y	KEVESPYEVHDYIRAYLGDTSEAKEFAKQFL	X;X;X;X;B2;X;B2;X;X;X;X;X;X;X;X;B2;X;X;X;X;X;X;X;X;X;X;X;X;X;X;X	XXXXXXXXXXXXXXPPPPPPPPPPXXXXXXX	AY(1)LGDTSEAK	AY(47.89)LGD(-47.89)T(-60.57)S(-66.05)E(-76.64)AK(-86.67)	2	2	-0.20289	By MS/MS	By matching	By MS/MS	270900000	270900000	0	0	42.048	90003000	107570000	73324000	51.327	48.765	29.528
E5RIW3;Q6FGD7;E5RJD8;O75347;E5RHG6	51;75;86;75;98	E5RIW3	E5RIW3	Tubulin-specific chaperone A	TBCA		0.995654	23.8537	7.03149e-05	86.67	54.449	74.92	0.990576	23.2514	7.03149e-05	86.67	0.958181	13.755	0.000675805	71.614	0.995654	23.8537	0.000483261	74.92		1	Y	SRMMIPDCQRRLEAAYLDLQRILENEKDLEE	X;X;X;X;X;X;X;X;X;X;X;X;X;X;X;B2;X;X;X;X;X;X;X;X;X;X;X;X;X;X;X	XXXXXXXXXXXPPPPPPPPPPXXXXXXXXXX	LEAAY(0.996)LD(0.004)LQR	LE(-39.48)AAY(23.85)LD(-23.85)LQ(-39.48)R(-46.71)	5	2	-0.3564	By MS/MS	By MS/MS	By MS/MS	372140000	372140000	0	0	2.1415	19398000	23447000	36528000	0.44578	0.38998	0.52081
P47813;X6RAC9;O14602;A6NJH9	106;78;106;89	P47813	P47813	Eukaryotic translation initiation factor 1A, X-chromosomal;Eukaryotic translation initiation factor 1A, Y-chromosomal	EIF1AX;EIF1AY		0.999939	42.1575	7.05841e-05	83.862	62.081	83.862	0.999181	30.8719	0.000521257	73.985	0.998993	29.9751	0.000405769	76.827	0.999939	42.1575	7.05841e-05	83.862		1	Y	VILKYNADEARSLKAYGELPEHAKINETDTF	X;X;X;X;B2;X;X;X;X;X;X;X;X;X;X;B2;X;X;X;X;X;X;X;X;X;X;X;X;X;X;X	XXXXXXXXXXXXXXPPPPPPPPPPXXXXXXX	AY(1)GELPEHAK	AY(42.16)GE(-42.16)LPE(-77.89)H(-82.19)AK(-83.86)	2	3	-0.18931	By MS/MS	By MS/MS	By MS/MS	5316600000	5316600000	0	0	119.81	1297900000	1434400000	1660400000	117.63	94.177	91.684
H0YKF8;H0YLA7;B4DP18;H0YM11;V9GY01;Q9Y448	40;53;9;34;9;87	H0YKF8	H0YKF8	Small kinetochore-associated protein	KNSTRN		0.737877	9.31057	7.33519e-05	52.509	36.371	52.509	0.737877	9.31057	7.33519e-05	52.509										1	Y	QPCRLVTMTSVVKTVYSLQPPSALSGGQPAD	X;X;X;X;X;X;X;X;X;X;X;X;X;X;X;B2;X;X;X;X;X;X;X;X;X;X;X;X;X;X;X	XXXXXXXXXXXXXPPPPPPPPPPPPPPPPPP	T(0.086)VY(0.738)S(0.086)LQ(0.086)PPS(0.002)ALSGGQPADTQTR	T(-9.31)VY(9.31)S(-9.31)LQ(-9.31)PPS(-25.45)ALS(-32.25)GGQ(-39.45)PAD(-45.32)T(-49.86)Q(-49.86)T(-49.86)R(-49.82)	3	3	1.1789	By MS/MS			8920400	8920400	0	0	NaN	8920400	0	0	NaN	NaN	NaN
A0A140VJW5;P14868;D3DP78;Q53T60	245;245;212;57	A0A140VJW5	A0A140VJW5	Aspartate--tRNA ligase, cytoplasmic	DARS		0.974618	19.6552	7.33918e-05	93.556	80.048	50.222	0.974618	19.6552	0.000989627	50.222	0.686107	6.40676	7.33918e-05	93.556	0.829406	10.0631	0.00114756	52.167		1	Y	GGANVFTVSYFKNNAYLAQSPQLYKQMCICA	X;X;X;X;X;X;X;X;X;X;X;X;X;X;X;B2;X;X;X;X;X;X;X;X;X;X;X;X;X;X;X	XXXXXXXXXXXXPPPPPPPPPPPPPXXXXXX	N(0.011)N(0.011)AY(0.975)LAQ(0.001)S(0.001)PQ(0.001)LYK	N(-19.66)N(-19.66)AY(19.66)LAQ(-29.49)S(-29.49)PQ(-28.98)LY(-33.22)K(-34)	4	3	-0.83098	By MS/MS	By MS/MS	By MS/MS	130550000	130550000	0	0	10.32	16422000	21056000	27215000	4.9632	4.1405	6.3947
O43390;B2R7W4;B4DMB1;Q0VGD6;B4DT28;Q6MZS5	208;208;170;182;69;185	O43390;Q6MZS5	O43390	Heterogeneous nuclear ribonucleoprotein R	HNRNPR;HNRPR;DKFZp686A13234		0.999998	57.2676	7.50748e-05	86.011	67.28	86.011	0.999917	40.855	0.000810907	69.598	0.999998	57.2676	7.50748e-05	86.011	0.99921	31.0566	0.00178839	59.8		1	Y	DLRLMMDPLSGQNRGYAFITFCGKEAAQEAV	X;X;X;X;X;X;X;X;X;X;X;X;X;X;X;B2;X;X;X;X;X;X;X;X;X;X;X;X;X;X;X	XXXXXXXXXXXXXXPPPPPPPPPPXXXXXXX	GY(1)AFITFCGK	GY(57.27)AFIT(-57.27)FC(-78.61)GK(-86.01)	2	2	-1.1693	By MS/MS	By MS/MS	By MS/MS	186170000	186170000	0	0	NaN	48003000	60114000	60392000	NaN	NaN	NaN
A0A0C4DGS1;A0A024RAD5;P39656	368;385;385	A0A0C4DGS1	A0A0C4DGS1	Dolichyl-diphosphooligosaccharide--protein glycosyltransferase 48 kDa subunit	DDOST		0.998864	29.4451	7.5173e-05	91.783	71.368	91.783					0.997501	26.0342	0.000342576	78.516	0.998864	29.4451	7.5173e-05	91.783		1	Y	KKGGKYSVQFKLPDVYGVFQFKVDYNRLGYT	X;X;X;X;X;X;X;X;X;X;X;X;X;X;X;B2;X;X;X;X;X;X;X;X;X;X;X;X;X;X;X	XXXXXXXXXXXPPPPPPPPPPPXXXXXXXXX	LPD(0.001)VY(0.999)GVFQFK	LPD(-29.45)VY(29.45)GVFQ(-58.39)FK(-75.33)	5	2	1.5629		By MS/MS	By MS/MS	295980000	295980000	0	0	NaN	0	48300000	34678000	NaN	NaN	NaN
Q9UKY7;D3DND1;H0Y8K3;D6R9V8;D6RFH2;D6RDN0	190;190;144;88;88;86	Q9UKY7	Q9UKY7	Protein CDV3 homolog	CDV3		0.583598	7.59088	7.54232e-05	58.418	37.755	58.418	0	0		NaN	0.442319	4.44317	0.000262488	43.658	0.583598	7.59088	7.54232e-05	58.418		1	Y	RLTTTRKTPQGPPEIYSDTQFPSLQSTAKHV	X;X;X;X;X;X;X;X;X;X;X;X;X;X;X;B2;X;X;X;X;X;X;X;X;X;X;X;X;X;X;X	XXXXXXPPPPPPPPPPPPPPPPPPPPPPPXX	K(0.102)T(0.102)PQ(0.085)GPPE(0.071)IY(0.584)S(0.037)D(0.014)T(0.006)Q(0.001)FPSLQSTAK	K(-7.59)T(-7.59)PQ(-8.39)GPPE(-9.17)IY(7.59)S(-11.96)D(-16.16)T(-20.26)Q(-27.44)FPS(-42.52)LQ(-51.43)S(-53)T(-54.27)AK(-55.22)	10	3	-0.61631			By MS/MS	73720000	73720000	0	0	3.908	0	0	73720000	0	0	NaN
A0A0K0K1K4;O14818;Q05DH1;B0YJ74;Q8TAA3;H0UI83;F5GY34	21;21;21;23;23;21;23	A0A0K0K1K4	A0A0K0K1K4	Proteasome subunit alpha type-7;Proteasome subunit alpha type;Proteasome subunit alpha type-7-like	PSMA7;PSMA8;hCG_41772		0.63912	5.46114	7.54885e-05	51.876	30.575	51.876					0.63912	5.46114	7.54885e-05	51.876						1	Y	AITVFSPDGHLFQVEYAQEAVKKGSTAVGVR	X;X;X;X;X;X;X;X;X;X;X;X;X;X;X;B2;X;X;X;X;X;X;X;X;X;X;X;X;X;X;X	PPPPPPPPPPPPPPPPPPPPPPXXXXXXXXX	AITVFS(0.001)PDGH(0.001)LFQ(0.006)VE(0.182)Y(0.639)AQ(0.054)E(0.05)AVK(0.068)	AIT(-40.11)VFS(-30.57)PD(-34.29)GH(-31.02)LFQ(-20.49)VE(-5.46)Y(5.46)AQ(-10.76)E(-11.07)AVK(-9.7)	16	3	-2.5087		By MS/MS		172050000	172050000	0	0	1.978	0	172050000	0	NaN	5.6507	0
V9HWN7;P04075;J3KPS3;A0A0M4FNU3;H3BR68	364;364;368;294;130	V9HWN7	V9HWN7	Fructose-bisphosphate aldolase;Fructose-bisphosphate aldolase A	HEL-S-87p;ALDOA		0.976213	17.274	7.59505e-05	57.045	44.772	42.209	0.912103	11.6678	0.000334164	41.115	0	0		NaN	0.976213	17.274	7.59505e-05	57.045		1	Y	AGAAASESLFVSNHAY_______________	X;X;X;X;X;X;X;X;X;X;X;X;X;X;X;B2;X;X;X;X;X;X;X;X;X;X;X;X;X;X;X	PPPPPPPPPPPPPPPPXXXXXXXXXXXXXXX	YTPSGQAGAAASESLFVS(0.001)N(0.004)H(0.018)AY(0.976)	Y(-42.21)T(-42.21)PS(-41.89)GQ(-41.89)AGAAAS(-41.89)E(-41.89)S(-41.89)LFVS(-29.92)N(-23.8)H(-17.27)AY(17.27)	22	2	-0.85034	By MS/MS	By matching	By MS/MS	566840000	566840000	0	0	3.4539	193090000	26071000	179690000	4.6403	0.47927	2.6384
P25789;H0YMZ1;H0YN18;H0YL69;B2RDG0;H0YMA1;H0YKT8;H0YLC2;H0YMI6;H0YKS0;H0YMV3	97;97;66;97;97;97;73;97;71;9;9	P25789	P25789	Proteasome subunit alpha type-4;Proteasome subunit alpha type;Proteasome subunit beta type	PSMA4		0.952068	14.4144	7.7021e-05	58.914	43.279	58.914	0.952068	14.4144	7.7021e-05	58.914					0	0		NaN		1	Y	DANVLTNELRLIAQRYLLQYQEPIPCEQLVT	X;X;X;X;X;X;X;X;X;X;X;X;X;X;X;B2;X;X;X;X;X;X;X;X;X;X;X;X;X;X;X	XXXXXXXXXXXXXXXPPPPPPPPPPPPPPPP	Y(0.952)LLQ(0.034)Y(0.008)Q(0.002)E(0.002)PIPC(0.001)EQLVTALCDIK	Y(14.41)LLQ(-14.41)Y(-20.65)Q(-26.58)E(-26.21)PIPC(-31.51)E(-36.5)Q(-45.84)LVT(-55.42)ALC(-58.89)D(-58.89)IK(-58.91)	1	3	-3.9607	By MS/MS		By matching	99946000	99946000	0	0	0.15788	49111000	0	50835000	0.33115	0	0.19327
Q96AF9;B4DQR8;Q28617;H0Y2Y8;Q9BUS0;Q15942;C9JJK5	357;376;384;431;472;463;153	Q96AF9	Q96AF9	Zyxin	ZYX		0.96061	13.8858	7.7186e-05	80.905	69.643	80.905	0	0		NaN					0.96061	13.8858	7.7186e-05	80.905		1	Y	GEPITDRMLRATGKAYHPHCFTCVVCARPLE	X;X;X;X;X;X;X;X;X;X;X;X;X;X;X;B2;X;X;X;X;X;X;X;X;X;X;X;X;X;X;X	XXXXXXXXXXXXXXPPPPPPPPPPPPPPXXX	AY(0.961)H(0.039)PHCFTCVVCAR	AY(13.89)H(-13.89)PH(-38.91)C(-53.57)FT(-64.64)C(-68.75)VVC(-80.12)AR(-80.91)	2	3	0.47978	By matching		By MS/MS	107430000	107430000	0	0	9.7724	29154000	0	78277000	NaN	0	13.204
V9HWH2;V9HW77;P12277;A0A0S2Z471;B4DP56;G3V4N7;G3V461	39;39;39;39;39;39;10	V9HWH2	V9HWH2	Creatine kinase B-type	HEL-S-29;HEL-211;CKB		0.953571	15.3623	7.79643e-05	91.584	60.866	91.584	0.944382	13.9385	9.86867e-05	90.108	0.943831	15.332	0.00032546	79.148	0.953571	15.3623	7.79643e-05	91.584		1	Y	SAHNNHMAKVLTPELYAELRAKSTPSGFTLD	X;X;X;X;X;X;X;X;X;X;X;X;X;X;X;B2;X;X;X;X;X;X;X;X;X;X;X;X;X;X;X	XXXXXXXXXPPPPPPPPPPPXXXXXXXXXXX	VLTPE(0.028)LY(0.954)AE(0.018)LR	VLT(-34.85)PE(-15.36)LY(15.36)AE(-17.21)LR(-36.02)	7	2	0.46139	By MS/MS	By MS/MS	By MS/MS	452690000	452690000	0	0	1.0945	94512000	92436000	136560000	0.52433	0.53971	2.1996
Q59EK6;A0A140VJY2;Q12931;Q53FS6;K0A7K7;Q5CAQ4;I3L0K7;Q9BV61;Q53G55;Q8N9Z3	497;498;498;498;470;289;289;493;498;491	Q59EK6;Q9BV61	Q9BV61	Heat shock protein 75 kDa, mitochondrial	TRAP1		0.902614	10.1025	8.08421e-05	85.212	64.93	85.212	0.902614	10.1025	8.08421e-05	85.212	0	0		NaN	0.884555	10.897	0.0158615	47.657		1	Y	LSEYASRMRAGTRNIYYLCAPNRHLAEHSPY	X;X;X;X;X;X;X;X;X;X;X;X;X;X;X;B2;X;X;X;X;X;X;X;X;X;X;X;X;X;X;B2	XXXXXXXXXXXXXPPPPPPPPPPXXXXXXXX	N(0.088)IY(0.903)Y(0.009)LCAPNR	N(-10.1)IY(10.1)Y(-19.96)LC(-38.79)APN(-70.54)R(-75.82)	3	2	-0.47874	By MS/MS	By matching	By matching	247870000	247870000	0	0	14.962	74220000	100430000	73226000	12.976	18.246	13.704
A0A024RD80;P08238;B4DMA2;B4DGL0;Q9H6X9;A8K3W9	596;596;558;586;234;234	A0A024RD80	A0A024RD80	Heat shock protein HSP 90-beta	HSP90AB1		0.716511	6.3774	8.11592e-05	60.602	48.579	60.602	0.291909	0	0.00131547	50.155	0.360083	0.0905864	8.11592e-05	52.541	0.716511	6.3774	8.23409e-05	60.602		1	Y	SNRLVSSPCCIVTSTYGWTANMERIMKAQAL	X;X;X;X;X;X;X;X;X;X;X;X;X;X;X;B2;X;X;X;X;X;X;X;X;X;X;X;X;X;X;X	XXXPPPPPPPPPPPPPPPPPPPPPXXXXXXX	LVS(0.01)S(0.013)PC(0.013)C(0.013)IVT(0.013)S(0.045)T(0.165)Y(0.717)GW(0.01)T(0.001)ANMER	LVS(-18.43)S(-17.44)PC(-17.44)C(-17.44)IVT(-17.44)S(-11.99)T(-6.38)Y(6.38)GW(-18.48)T(-29.54)AN(-41.83)M(-41.29)E(-40.73)R(-43.89)	13	3	-1.796		By matching	By MS/MS	574720000	574720000	0	0	5.4272	0	150960000	219390000	0	3.7811	6.3236
V9HW41;P61088;F8VZ29;F8VSD4;F8VV71	34;34;34;34;34	V9HW41	V9HW41	Ubiquitin-conjugating enzyme E2 N	HEL-S-71;UBE2N		0.949737	12.7669	8.1267e-05	65.085	55.67	65.085	0.828324	6.83653	8.92543e-05	55.453	0.931876	11.3624	8.90823e-05	62.231	0.949737	12.7669	8.1267e-05	65.085		1	Y	PVPGIKAEPDESNARYFHVVIAGPQDSPFEG	X;X;X;X;X;X;X;X;X;X;X;X;X;X;X;B2;X;X;X;X;X;X;X;X;X;X;X;X;X;X;X	XXXXXXXXXXXXXXXPPPPPPPPPPPPPPPP	Y(0.95)FH(0.05)VVIAGPQDSPFEGGTFK	Y(12.77)FH(-12.77)VVIAGPQ(-45.77)D(-50.31)S(-54.4)PFE(-60.92)GGT(-64.5)FK(-65.08)	1	3	-0.29612	By MS/MS	By MS/MS	By MS/MS	467510000	467510000	0	0	NaN	144880000	179320000	143300000	NaN	NaN	NaN
A0A384NPU2;P49773	109;109	A0A384NPU2	A0A384NPU2	Histidine triad nucleotide-binding protein 1	HINT1		0.749344	6.54063	8.13984e-05	69.765	55.802	69.765	0.561103	6.8838	0.000117336	58.914	0.575886	6.29978	0.000120617	62.589	0.749344	6.54063	8.13984e-05	69.765		1	Y	YRMVVNEGSDGGQSVYHVHLHVLGGRQMHWP	X;X;X;X;X;X;X;X;X;X;X;X;X;X;X;B2;X;X;X;X;X;X;X;X;X;X;X;X;X;X;X	XXPPPPPPPPPPPPPPPPPPPPPPPPXXXXX	MVVN(0.001)E(0.001)GS(0.003)D(0.009)GGQ(0.034)S(0.034)VY(0.749)H(0.166)VH(0.002)LHVLGGR	M(-40.32)VVN(-28.65)E(-28.65)GS(-23.59)D(-19.01)GGQ(-13.48)S(-13.48)VY(6.54)H(-6.54)VH(-25.42)LH(-36.1)VLGGR(-51.05)	14	4	1.2947	By MS/MS	By MS/MS	By MS/MS	483030000	483030000	0	0	0.85596	59884000	275910000	147240000	0.33068	1.6799	0.67239
D3DVA5;V9GYM8;A0A5F9ZI21;Q92974;B4DJ49;B7Z977;V9GZ14;V9GYF5;V9GYG5	170;170;268;125;98;170;98;117;98	D3DVA5	D3DVA5	Rho guanine nucleotide exchange factor 2	ARHGEF2		0.960949	18.5074	8.26203e-05	66.784	51.633	66.784	0.960949	18.5074	8.26203e-05	66.784	0.622983	2.90303	0.000483832	53.995	0.796497	8.26825	0.00139743	47.301		1	Y	LRSKTTIRERPSSAIYPSDSFRQSLLGSRRG	X;X;X;X;X;X;X;X;X;X;X;X;X;X;X;B2;X;X;X;X;X;X;X;X;X;X;X;X;X;X;X	XXXXXXXXPPPPPPPPPPPPPPXXXXXXXXX	E(0.002)R(0.002)PS(0.014)S(0.014)AIY(0.961)PS(0.006)D(0.002)SFR	E(-26.47)R(-26.47)PS(-18.51)S(-18.51)AIY(18.51)PS(-22.35)D(-27.78)S(-36.24)FR(-37.05)	8	3	0.25823	By MS/MS	By MS/MS	By MS/MS	186230000	186230000	0	0	NaN	46892000	57408000	48301000	NaN	NaN	NaN
A8K6Q9;A0A024RDV9;Q8N0X7;B4DXT5;B3KML8	628;628;628;325;335	A8K6Q9	A8K6Q9	Spartin	SPG20		0.671876	5.12023	8.2827e-05	58.479	44.048	58.479	0.535724	4.10493	0.00014661	49.528					0.671876	5.12023	8.2827e-05	58.479		1	Y	VKKTATQTGHTLLEDYQIVDNSQRENQEGAA	X;X;X;X;X;X;X;X;X;X;X;X;X;X;X;B2;X;X;X;X;X;X;X;X;X;X;X;X;X;X;X	XXXPPPPPPPPPPPPPPPPPPPPPXXXXXXX	T(0.001)AT(0.001)Q(0.001)T(0.001)GH(0.001)T(0.001)LLE(0.065)D(0.207)Y(0.672)Q(0.05)IVD(0.002)NSQR	T(-30.53)AT(-30.76)Q(-30.76)T(-30.76)GH(-30.76)T(-26.99)LLE(-10.12)D(-5.12)Y(5.12)Q(-11.32)IVD(-25.31)N(-34.59)S(-38.45)Q(-38.1)R(-42.07)	13	3	-1.9327	By MS/MS		By MS/MS	56306000	56306000	0	0	1.5633	21718000	0	34588000	1.7228	0	2.7035
Q15654;F2ZC09	55;55	Q15654	Q15654	Thyroid receptor-interacting protein 6	TRIP6;TRIP6i4		0.606455	4.75851	8.37505e-05	67.43	52.856	61.767	0.165445	0	0.000109052	67.43	0.606455	4.75851	8.37505e-05	61.767	0.368341	0	0.000118479	65.784		1	Y	PHPRVNFCPLPSEQCYQAPGGPEDRGPAWVG	X;X;X;X;X;X;X;X;X;X;X;X;X;X;X;B2;X;X;X;X;X;X;X;X;X;X;X;X;X;X;X	XXXXPPPPPPPPPPPPPPPPPPPPPXXXXXX	VN(0.003)FC(0.044)PLPS(0.038)E(0.038)Q(0.038)C(0.203)Y(0.606)Q(0.029)APGGPEDR	VN(-23.39)FC(-11.41)PLPS(-12)E(-12)Q(-12)C(-4.76)Y(4.76)Q(-13.15)APGGPE(-51.44)D(-54.41)R(-54.32)	12	3	-0.55396		By MS/MS		60143000	60143000	0	0	0.6966	0	60143000	0	0	1.6213	0
P30085;A0A494BXC7	155;138	P30085	P30085	UMP-CMP kinase	CMPK1		0.652246	5.46323	8.40416e-05	68.952	55.915	68.952	0.652246	5.46323	8.40416e-05	68.952					0.466746	0	0.00107434	62.556		1	Y	RSDDNRESLEKRIQTYLQSTKPIIDLYEEMG	X;X;X;X;X;X;X;X;X;X;X;X;X;X;X;B2;X;X;X;X;X;X;X;X;X;X;X;X;X;X;X	XXXXXXXXXXXXPPPPPPPPPPPPPPPPPPP	IQ(0.034)T(0.185)Y(0.652)LQ(0.039)S(0.039)T(0.039)K(0.012)PIIDLYEEMGK	IQ(-12.87)T(-5.46)Y(5.46)LQ(-12.24)S(-12.24)T(-12.24)K(-17.43)PIID(-36.83)LY(-45.52)E(-52.72)E(-60.74)M(-63.45)GK(-65.53)	4	3	-0.32943	By MS/MS			271360000	271360000	0	0	NaN	271360000	0	0	NaN	NaN	NaN
Q6NTA2;A0A384N6C7;P14866;M0QXS5;A0A3B3ITJ4;M0QYT0	413;430;430;371;378;47	Q6NTA2;M0QYT0	Q6NTA2	Heterogeneous nuclear ribonucleoprotein L	HNRNPL		0.634577	4.37801	8.41043e-05	59.342	49.291	59.342	0.634577	4.37801	8.41043e-05	59.342										1	Y	MKSKPGAAMVEMADGYAVDRAITHLNNNFMF	X;X;X;X;X;X;X;X;X;X;X;X;X;X;X;B2;X;X;X;X;X;X;X;X;X;X;X;X;X;X;X	XXPPPPPPPPPPPPPPPPPPXXXXXXXXXXX	SKPGAAMVE(0.001)M(0.004)AD(0.07)GY(0.635)AVD(0.232)R(0.059)	S(-52.92)K(-52.92)PGAAM(-47.06)VE(-29.77)M(-22.06)AD(-9.57)GY(4.38)AVD(-4.38)R(-10.31)	14	3	-0.39174	By MS/MS			79002000	79002000	0	0	3.3448	79002000	0	0	19.305	0	0
A0A024R3X4;P10809;B3GQS7;B7Z597;B7Z4F6;B7Z5E7;Q53SE2;E7ESH4;B7Z532;B9VPB4;B9VP19	227;227;227;218;204;171;227;225;83;111;111	A0A024R3X4	A0A024R3X4	60 kDa heat shock protein, mitochondrial	HSPD1		0.99408	22.4821	8.48478e-05	92.538	65.052	92.538	0.99408	22.4821	8.48478e-05	92.538	0.850415	7.63898	0.000279571	63.091	0.941847	12.4273	0.000167041	87.895		1	Y	EIIEGMKFDRGYISPYFINTSKGQKCEFQDA	X;X;X;X;X;X;X;X;X;X;X;X;X;X;X;B2;X;X;X;X;X;X;X;X;X;X;X;X;X;X;X	XXXXXXXXXXPPPPPPPPPPPPXXXXXXXXX	GYIS(0.006)PY(0.994)FINTSK	GY(-55.95)IS(-22.48)PY(22.48)FIN(-36.53)T(-42.07)S(-50.35)K(-49.1)	6	2	-1.03	By MS/MS	By MS/MS	By MS/MS	4719800000	4719800000	0	0	16.589	584390000	594970000	589490000	6.9486	6.0847	5.744
Q8IZ29;P68371;Q8IWP6;Q8N6N5;B3KML9;B4DNW1	51;51;51;51;51;51	Q8IZ29	Q8IZ29	Tubulin beta-4B chain	TUBB2C;TUBB4B		0.977208	17.8447	8.65016e-05	92.445	78.782	92.445	0.810378	6.44445	0.000229938	71.085	0.977208	17.8447	8.65016e-05	92.445	0.816172	7.05448	0.000184981	86.882		1	Y	YHGDSDLQLERINVYYNEATGGKYVPRAVLV	B2;B2;X;B2;X;X;X;X;X;X;X;X;X;X;X;B2;X;X;X;X;X;X;X;X;X;X;X;X;X;X;X	XXXXXXXXXXXPPPPPPPPPPPPXXXXXXXX	INVY(0.016)Y(0.977)N(0.006)EATGGK	IN(-42.07)VY(-17.84)Y(17.84)N(-21.89)E(-34.36)AT(-55.38)GGK(-67.65)	5	2	-1.2099	By MS/MS	By MS/MS	By MS/MS	3479300000	3479300000	0	0	NaN	932820000	1030800000	1028900000	NaN	NaN	NaN
A0A024R1U2;Q7RTV0	70;70	A0A024R1U2	A0A024R1U2	PHD finger-like domain-containing protein 5A	PHF5A		0.732053	8.50697	8.6799e-05	60.434	55.543	60.434	0.732053	8.50697	8.6799e-05	60.434	0.678106	7.98323	0.0013196	40.801	0.654037	6.96062	0.000239732	55.401		1	Y	QGRCVICGGPGVSDAYYCKECTIQEKDRDGC	B2;X;X;X;X;X;X;X;X;X;X;X;X;X;X;B2;X;X;X;X;X;X;X;X;X;X;X;X;X;X;X	XXXPPPPPPPPPPPPPPPPXXXXXXXXXXXX	CVICGGPGVS(0.001)D(0.008)AY(0.732)Y(0.071)C(0.085)K(0.103)	C(-54.94)VIC(-36.58)GGPGVS(-28.43)D(-19.84)AY(8.51)Y(-10.15)C(-9.34)K(-8.51)	13	2	-0.99245	By MS/MS	By MS/MS	By MS/MS	375820000	375820000	0	0	8.1241	46835000	85491000	90594000	3.7164	5.1315	5.33
Q5JP53;A0A384NYT8;Q5SU16;P07437;B7ZAF0;B4DY90;Q6LC01;B4DMU8;B4DMJ5	32;49;50;50;21;70;43;50;50	Q5JP53	Q5JP53	Tubulin beta chain	TUBB		0.924927	11.4466	8.68073e-05	92.428	74.691	90.263	0.814101	6.6069	8.68073e-05	92.428	0.831455	7.11065	0.000239212	83.456	0.924927	11.4466	0.000125134	90.263		1	Y	TYHGDSDLQLDRISVYYNEATGGKYVPRAIL	B2;B2;B2;X;X;X;X;X;X;X;X;X;X;X;X;B2;X;X;X;X;X;X;X;X;X;X;X;X;X;X;X	XXXXXXXXXXXXPPPPPPPPPPPPXXXXXXX	IS(0.066)VY(0.925)Y(0.009)NEATGGK	IS(-11.45)VY(11.45)Y(-20.23)N(-46.95)E(-59.34)AT(-72.83)GGK(-84.48)	4	2	0.92649	By MS/MS	By MS/MS	By MS/MS	18057000000	18057000000	0	0	NaN	3677500000	5620500000	6848600000	NaN	NaN	NaN
A0A024RAM2;P35754;D3DQK5	25;25;25	A0A024RAM2	A0A024RAM2	Glutaredoxin-1	GLRX;hCG_1979388		0.989162	20.2845	8.76113e-05	99.279	84.761	99.279	0.989162	20.2845	8.76113e-05	99.279	0.934262	16.2133	0.000161953	71.085	0.975705	18.7994	0.0018556	80.294		1	Y	IQPGKVVVFIKPTCPYCRRAQEILSQLPIKQ	X;X;X;X;X;X;X;X;X;X;X;X;X;X;X;B2;X;X;X;X;X;X;X;X;X;X;X;X;X;X;X	XXXXXPPPPPPPPPPPPPXXXXXXXXXXXXX	PTCPY(0.989)C(0.009)R(0.002)	PT(-79.72)C(-48.74)PY(20.28)C(-20.28)R(-28.02)	5	2	-1.5493	By MS/MS	By MS/MS	By MS/MS	638220000	638220000	0	0	NaN	80478000	148620000	194660000	NaN	NaN	NaN
F5H4M0;A0A024RBU0;Q9H9H4	189;191;191	F5H4M0	F5H4M0	Vacuolar protein sorting-associated protein 37B	VPS37B		0.862344	9.42198	8.78968e-05	55.469	35.63	47.796	0.489729	0	0.000115449	55.469	0.693392	5.12084	0.000164783	43.494	0.862344	9.42198	8.78968e-05	47.796		1	Y	LPPRLPELAPTAPLPYPAPEASGPPAVAPRR	X;X;X;X;X;X;X;X;X;X;X;X;X;X;X;B2;X;X;X;X;X;X;X;X;X;X;X;X;X;X;X	XXXXPPPPPPPPPPPPPPPPPPPPPPPPPPX	LPE(0.029)LAPT(0.099)APLPY(0.862)PAPE(0.008)AS(0.001)GPPAVAPR	LPE(-14.72)LAPT(-9.42)APLPY(9.42)PAPE(-20.07)AS(-27.9)GPPAVAPR(-36.59)	12	3	-1.6568		By MS/MS	By MS/MS	47922000	47922000	0	0	NaN	0	28255000	19667000	NaN	NaN	NaN
A0A024RD80;P08238;B4DMA2;B4DGL0;Q9H6X9;A8K3W9;Q58FF7	520;520;482;510;158;158;393	A0A024RD80	A0A024RD80	Heat shock protein HSP 90-beta;Putative heat shock protein HSP 90-beta-3	HSP90AB1;HSP90AB3P		0.67867	7.18515	8.91726e-05	58.672	6.3741	58.672	0.67867	7.18515	8.91726e-05	58.672										1	Y	KRGFEVVYMTEPIDEYCVQQLKEFDGKSLVS	X;X;X;X;X;X;X;X;X;X;X;X;X;X;X;B2;X;X;X;X;X;X;X;X;X;X;X;X;X;X;X	XXPPPPPPPPPPPPPPPPPPPPXXXXXXXXX	GFEVVY(0.006)M(0.008)T(0.008)E(0.008)PID(0.03)E(0.13)Y(0.679)C(0.13)VQ(0.001)QLK	GFE(-34.66)VVY(-20.65)M(-19.29)T(-19.29)E(-19.29)PID(-13.58)E(-7.19)Y(7.19)C(-7.19)VQ(-27.31)Q(-33.13)LK(-32.43)	14	3	-0.8973	By MS/MS			353060000	353060000	0	0	0.81024	353060000	0	0	1.4724	NaN	0
A0A024R5K8;P50454;B4DN87;A8K259;E9PKH2;H0YEP8	383;383;362;383;166;21	A0A024R5K8	A0A024R5K8	Serpin H1	SERPINH1		0.96643	14.6897	9.06695e-05	89.301	57.879	89.301	0.96643	14.6897	9.06695e-05	89.301	0.890262	9.27212	0.000134163	66.498	0.748487	4.78032	0.000132415	77.597		1	Y	QDIYGREELRSPKLFYADHPFIFLVRDTQSG	X;X;X;X;X;X;X;X;X;X;X;X;X;X;X;B2;X;X;X;X;X;X;X;X;X;X;X;X;X;X;X	XXXXXXXXXXXXXPPPPPPPPPPPPPXXXXX	LFY(0.966)AD(0.033)H(0.001)PFIFLVR	LFY(14.69)AD(-14.69)H(-31.13)PFIFLVR(-85.98)	3	3	-1.2949	By MS/MS	By MS/MS	By MS/MS	266110000	266110000	0	0	0.64384	81204000	90545000	94366000	0.9892	0.75623	0.44616
B4DLT1;S4R3Q6;O75436	101;93;118	B4DLT1;S4R3Q6	S4R3Q6	Vacuolar protein sorting-associated protein 26A	VPS26A		0.660948	7.48126	9.26114e-05	57.009	53.289	57.009	0.660948	7.48126	9.45649e-05	57.009					0.550762	8.57499	9.26114e-05	54.271		1	Y	QSRSYDFEFMQVEKPYESYIGANVRLRYFLK	X;X;X;X;X;X;X;X;X;X;X;X;X;X;X;B2;X;X;X;X;X;X;X;X;X;X;X;X;X;X;X	XXXPPPPPPPPPPPPPPPPPPPPPPXXXXXX	SYD(0.001)FE(0.006)FM(0.022)Q(0.022)VE(0.022)K(0.118)PY(0.661)E(0.118)S(0.022)Y(0.006)IGANVR	S(-35.14)Y(-35.14)D(-28.81)FE(-20.49)FM(-14.7)Q(-14.7)VE(-14.7)K(-7.48)PY(7.48)E(-7.48)S(-14.7)Y(-20.49)IGAN(-36.75)VR(-36.57)	13	3	-1.6025	By MS/MS		By MS/MS	53663000	53663000	0	0	1.891	19062000	0	34601000	1.6582	0	5.1855
O43390;B2R7W4;B4DMB1;Q0VGD6;B4DT28;B4DMD1;Q7Z334;A0A286YEZ8;Q6MZS5	435;435;397;409;296;275;45;63;415	O43390;Q6MZS5	O43390	Heterogeneous nuclear ribonucleoprotein R	HNRNPR;HNRPR;DKFZp686O0665;DKFZp686A13234		0.650407	10.2654	9.46216e-05	62.14	57.954	62.14					0	0		NaN	0.650407	10.2654	9.46216e-05	62.14		1	Y	QAARQASRSTAYEDYYYHPPPRMPPPIRGRG	X;X;X;X;X;X;X;X;X;X;X;X;X;X;X;B2;X;X;X;X;X;X;X;X;X;X;X;X;X;X;X	XXXXXXXXPPPPPPPPPPPPPPXXXXXXXXX	S(0.018)T(0.018)AY(0.039)E(0.039)D(0.053)Y(0.061)Y(0.65)Y(0.061)H(0.061)PPPR	S(-15.66)T(-15.66)AY(-12.21)E(-12.21)D(-10.93)Y(-10.27)Y(10.27)Y(-10.27)H(-10.27)PPPR(-49.02)	8	3	0.14967			By MS/MS	172280000	172280000	0	0	0.71388	0	0	172280000	0	0	2.0954
C9J0K6;P30626;B4DHQ6	24;67;67	C9J0K6	C9J0K6	Sorcin	SRI		0.787807	7.83544	9.57053e-05	66.325	56.404	66.325	0.787807	7.83544	9.57053e-05	66.325					0.404289	0.995747	0.00214912	46.133		1	Y	DELQRCLTQSGIAGGYKPFNLETCRLMVSML	X;X;X;X;X;X;X;X;X;X;X;X;X;X;X;B2;X;X;X;X;X;X;X;X;X;X;X;X;X;X;X	XXXXXPPPPPPPPPPPPPPPPPPPPXXXXXX	C(0.001)LT(0.031)Q(0.028)S(0.023)GIAGGY(0.788)K(0.13)PFNLETCR	C(-30.21)LT(-14.03)Q(-14.51)S(-15.44)GIAGGY(7.84)K(-7.84)PFN(-37.2)LE(-49.18)T(-52.31)C(-52.16)R(-52.02)	11	3	-1.5494	By MS/MS			61772000	61772000	0	0	1.427	61772000	0	0	NaN	0	NaN
B4DGM9;O14656;B3KPA1	322;290;259	B4DGM9	B4DGM9	Torsin-1A	TOR1A		0.994126	22.3084	9.65194e-05	90.263	60.789	81.263	0.990122	20.1625	9.65194e-05	90.263	0.994126	22.3084	0.000268182	81.263	0.98244	17.6551	0.00137334	58.37		1	Y	KHLKMCIRVEMQSRGYEIDEDIVSRVAEEMT	X;X;X;X;X;X;X;X;X;X;X;X;X;X;X;B2;X;X;X;X;X;X;X;X;X;X;X;X;X;X;X	XXXXXXXXXXXXXXPPPPPPPPPPPXXXXXX	GY(0.994)E(0.006)IDEDIVSR	GY(22.31)E(-22.31)ID(-45.44)E(-56.42)D(-66.06)IVS(-78.87)R(-81.26)	2	2	1.0727	By MS/MS	By MS/MS	By MS/MS	166150000	166150000	0	0	NaN	48582000	59346000	50792000	NaN	NaN	NaN
D9IAI1;P30086;A0A0K0K1J6;V9HW05	181;181;134;90	D9IAI1	D9IAI1	Phosphatidylethanolamine-binding protein 1;Hippocampal cholinergic neurostimulating peptide	HEL-S-34;PEBP1;HEL-210		0.99984	37.9931	9.85419e-05	87.435	46.862	87.435	0.999797	36.9235	0.000623349	84.498	0.99984	37.9931	0.00103232	87.435	0.999003	30.0826	9.85419e-05	71.922		1	Y	GTCYQAEWDDYVPKLYEQLSGK_________	X;X;X;X;X;X;X;X;X;X;X;X;X;X;X;B2;X;X;X;X;X;X;X;X;X;X;X;X;X;X;X	PPPPPPPPPPPPPPPPPPPPPPXXXXXXXXX	LY(1)EQLSGK	LY(37.99)E(-37.99)Q(-59.26)LS(-78.61)GK(-87.43)	2	2	-0.39791	By MS/MS	By MS/MS	By MS/MS	2682100000	2682100000	0	0	30.028	823150000	846590000	868120000	27.577	16.168	122.15
Q9BU02;G3V5B9;G3V5Q5	31;31;31	Q9BU02	Q9BU02	Thiamine-triphosphatase	THTPA		0.836607	10.1344	9.86867e-05	90.108	48.679	90.108	0.820652	7.12843	0.000122789	88.392	0.528788	1.97605	0.00051512	72.365	0.836607	10.1344	9.86867e-05	90.108		1	Y	PGTEERLQELGGTLEYRVTFRDTYYDTPELS	X;X;X;X;X;X;X;X;X;X;X;X;X;X;X;B2;X;X;X;X;X;X;X;X;X;X;X;X;X;X;X	XXXXXXPPPPPPPPPPPXXXXXXXXXXXXXX	LQELGGT(0.001)LE(0.081)Y(0.837)R(0.081)	LQ(-81.15)E(-68.64)LGGT(-28.55)LE(-10.13)Y(10.13)R(-10.13)	10	2	-1.7259	By MS/MS	By MS/MS	By MS/MS	51011000	51011000	0	0	NaN	16976000	12114000	21921000	NaN	NaN	NaN
Q9Y333	35	Q9Y333	Q9Y333	U6 snRNA-associated Sm-like protein LSm2	LSM2		0.611244	6.46942	0.000100986	62.891	42.428	50.425	0.589434	6.76846	0.000100986	62.891	0.611244	6.46942	0.000182239	50.425						1	Y	KNDLSICGTLHSVDQYLNIKLTDISVTDPEK	X;X;X;X;X;X;X;X;X;X;X;X;X;X;X;B2;X;X;X;X;X;X;X;X;X;X;X;X;X;X;X	XPPPPPPPPPPPPPPPPPPPXXXXXXXXXXX	NDLSIC(0.001)GT(0.001)LH(0.007)S(0.005)VD(0.019)Q(0.103)Y(0.611)LN(0.114)IK(0.138)	N(-49.14)D(-49.14)LS(-37.94)IC(-26.12)GT(-26.12)LH(-19.66)S(-20.98)VD(-15.04)Q(-7.71)Y(6.47)LN(-7.3)IK(-6.47)	15	3	0.4903	By MS/MS	By MS/MS		879480000	879480000	0	0	NaN	184670000	0	0	NaN	NaN	NaN
Q53F35;Q92688	131;131	Q53F35	Q53F35	Acidic leucine-rich nuclear phosphoprotein 32 family member B	ANP32B		0.554578	7.90849	0.000101683	54.271	40.112	54.271	0	0		NaN	0.554578	7.90849	0.000101683	54.271						1	Y	KSLDLFNCEVTNLNDYRESVFKLLPQLTYLD	X;X;X;X;X;X;X;X;X;X;X;X;X;X;X;B2;X;X;X;X;X;X;X;X;X;X;X;X;X;X;X	XPPPPPPPPPPPPPPPPPPPPPXXXXXXXXX	SLDLFNCEVT(0.001)N(0.001)LN(0.077)D(0.066)Y(0.555)R(0.066)E(0.066)S(0.077)VFK(0.09)	S(-51.55)LD(-46.82)LFN(-40.95)C(-40.95)E(-40.95)VT(-26.32)N(-26.32)LN(-8.57)D(-9.22)Y(7.91)R(-9.22)E(-9.22)S(-8.57)VFK(-7.91)	15	3	-1.1076		By MS/MS		77407000	77407000	0	0	0.052647	0	77407000	0	0	0.23795	0
A0A0S2Z4Z0;Q96PK6;Q59GV2	285;285;219	A0A0S2Z4Z0	A0A0S2Z4Z0	RNA-binding protein 14	RBM14		0.913667	10.2462	0.000101746	91.584	65.645	91.584					0.873374	8.38698	0.000312803	77.662	0.913667	10.2462	0.000101746	91.584		1	Y	AASYRAQPSVSLGAPYRGQLASPSSQSAAAS	X;X;X;B2;B2;X;X;X;X;X;X;X;X;X;X;B2;X;X;X;X;X;X;X;X;X;X;X;X;X;X;X	XXXXXPPPPPPPPPPPPXXXXXXXXXXXXXX	AQPSVSLGAPY(0.914)R(0.086)	AQ(-87.29)PS(-71.28)VS(-56.86)LGAPY(10.25)R(-10.25)	11	2	-1.1099		By MS/MS	By MS/MS	215810000	215810000	0	0	7.0005	0	110280000	105530000	0	9.772	9.4015
Q9Y3C1;D6RIC3;A0A0C4DGU5;Q9P0T8;A0A087X2G6	92;92;92;67;92	Q9Y3C1	Q9Y3C1	Nucleolar protein 16	NOP16		0.615658	4.6711	0.000103337	70.094	41.811	70.094					0	0		NaN	0.615658	4.6711	0.000103337	70.094		1	Y	EVDIEERPKELVRKPYVLNDLEAEASLPEKK	X;X;X;X;X;X;X;X;X;X;X;X;X;X;X;B2;X;X;X;X;X;X;X;X;X;X;X;X;X;X;X	XXXXXXXXXXXXXPPPPPPPPPPPPPPPPPP	K(0.129)PY(0.616)VLN(0.21)D(0.045)LE(0.001)AEASLPEKK	K(-6.79)PY(4.67)VLN(-4.67)D(-11.4)LE(-28.58)AE(-47.66)AS(-54.84)LPE(-66.71)K(-69.7)K(-69.68)	3	4	0.0055749		By matching	By MS/MS	165580000	165580000	0	0	NaN	0	77562000	88023000	NaN	NaN	NaN
B3KRV7;Q6IAV0;Q53HW6;A8K2M5;A0A1B1RVA9;P06858;B7Z4C6;Q71UV2	177;191;191;191;191;191;115;48	B3KRV7	B3KRV7	Lipoprotein lipase	LPL		0.775982	7.95873	0.000103994	54.764	44.627	41.644					0.775982	7.95873	0.000103994	54.764	0	0		NaN		1	Y	VNRITGLDPAGPNFEYAEAPSRLSPDDADFV	X;X;X;X;X;X;X;X;X;X;X;X;X;X;X;B2;X;X;X;X;X;X;X;X;X;X;X;X;X;X;X	XXXPPPPPPPPPPPPPPPPPPPXXXXXXXXX	IT(0.004)GLD(0.031)PAGPN(0.031)FE(0.124)Y(0.776)AE(0.031)APS(0.001)R(0.001)	IT(-22.59)GLD(-13.97)PAGPN(-13.97)FE(-7.96)Y(7.96)AE(-13.97)APS(-27.9)R(-28.77)	13	2	-1.1509		By MS/MS	By matching	74226000	74226000	0	0	NaN	0	22348000	26264000	NaN	NaN	NaN
Q15717;M0QZR9	63;63	Q15717	Q15717	ELAV-like protein 1	ELAVL1		0.989973	23.8421	0.000104041	56.768	40.099	56.768	0.978737	19.7756	0.000483245	47.491	0.944333	17.6576	0.000908561	41.188	0.989973	23.8421	0.000104041	56.768		1	Y	SAKLIRDKVAGHSLGYGFVNYVTAKDAERAI	X;X;X;X;X;X;X;X;X;X;X;X;X;X;X;B2;X;X;X;X;X;X;X;X;X;X;X;X;X;X;X	XXXXXXXXPPPPPPPPPPPPPPPPPXXXXXX	VAGH(0.004)S(0.004)LGY(0.99)GFVN(0.001)Y(0.001)VTAK	VAGH(-23.84)S(-23.84)LGY(23.84)GFVN(-29.05)Y(-32.87)VT(-39.97)AK(-49.64)	8	3	-0.45425	By MS/MS	By MS/MS	By MS/MS	168150000	168150000	0	0	0.95345	47108000	53914000	67125000	0.55743	1.0583	1.6411
Q9Y2W1;A0A3B3ITZ9;Q7Z5U1;Q05D20;Q6P0P7;Q6PJV4	228;228;228;228;228;228	Q9Y2W1	Q9Y2W1	Thyroid hormone receptor-associated protein 3	THRAP3		0.673687	4.77137	0.000107777	63.606	54.201	63.606	0.536584	4.25413	0.000364147	45.135					0.673687	4.77137	0.000107777	63.606		1	Y	DTKASESSKPWPDATYGTGSASRASAVSELS	X;X;X;X;X;X;X;X;X;X;X;X;X;X;X;B2;X;X;X;X;X;X;X;X;X;X;X;X;X;X;X	XXXPPPPPPPPPPPPPPPPPPPPXXXXXXXX	AS(0.001)E(0.001)S(0.002)S(0.002)K(0.007)PW(0.076)PD(0.005)AT(0.225)Y(0.674)GT(0.005)GS(0.001)ASR	AS(-28.81)E(-29.34)S(-24.66)S(-24.66)K(-19.78)PW(-9.46)PD(-20.99)AT(-4.77)Y(4.77)GT(-20.99)GS(-29.34)AS(-32.33)R(-36.69)	13	3	0.18204	By MS/MS		By MS/MS	159000000	159000000	0	0	10.325	82081000	0	76923000	17.148	0	15.14
Q9Y2W1;A0A3B3ITZ9	873;873	Q9Y2W1	Q9Y2W1	Thyroid hormone receptor-associated protein 3	THRAP3		0.686817	4.08675	0.000110058	89.507	82.468	89.507	0.686817	4.08675	0.000110058	89.507					0.63149	4.65538	0.000158987	73.877		1	Y	NDFQKRNREEEWDPEYTPKSKKYYLHDDREG	X;X;X;X;X;X;X;X;X;X;X;X;X;X;X;B2;X;X;X;X;X;B2;B2;X;X;X;X;X;X;X;X	XXXXXXPPPPPPPPPPPPPXXXXXXXXXXXX	NREEEWDPE(0.009)Y(0.687)T(0.268)PK(0.036)	N(-84.88)R(-77.71)E(-75.48)E(-70.31)E(-60.72)W(-49.44)D(-42.32)PE(-18.88)Y(4.09)T(-4.09)PK(-12.78)	10	3	-0.87318	By MS/MS		By MS/MS	330040000	330040000	0	0	1.9152	117070000	0	160830000	2.4266	0	2.6232
V9HWE1;Q53HU8;P08670;B0YJC4;B3KRK8;A0A1B0GTT5;A0A1B0GVG8	61;61;61;61;48;61;61	V9HWE1	V9HWE1	Vimentin	HEL113;VIM		0.799469	6.66322	0.000110118	81.625	61.343	81.625					0.458143	0	0.000110118	73.951	0.799469	6.66322	0.000133239	81.625		1	Y	PSTSRSLYASSPGGVYATRSSAVRLRSSVPG	X;X;X;X;X;X;X;X;X;X;X;X;X;X;X;B2;X;X;X;X;X;X;X;X;X;X;X;X;X;X;X	XXXXXPPPPPPPPPPPPPPXXXXXXXXXXXX	SLYASSPGGVY(0.799)AT(0.172)R(0.028)	S(-77.95)LY(-69.46)AS(-46.87)S(-40.9)PGGVY(6.66)AT(-6.66)R(-14.55)	11	2	-0.73261			By MS/MS	11646000	11646000	0	0	2.4151	0	0	11646000	0	0	7.388
A0A0C4DGQ5;P04632;A0A075B7C0;K7ELJ7;K7EIV0;K7EM73	76;76;27;76;21;76	A0A0C4DGQ5	A0A0C4DGQ5	Calpain small subunit 1	CAPNS1		0.540997	4.07264	0.00011051	48.832	39.299	48.832	0	0		NaN	0.540997	4.07264	0.00011051	48.832						1	Y	ILGGVISAISEAAAQYNPEPPPPRTHYSNIE	X;X;X;X;X;X;X;X;X;X;X;X;X;X;X;B2;X;X;X;X;X;X;X;X;B2;X;B2;X;X;X;X	PPPPPPPPPPPPPPPPPPPPPPPPXXXXXXX	ILGGVIS(0.01)AIS(0.085)E(0.085)AAAQ(0.212)Y(0.541)N(0.064)PE(0.004)PPPPR	ILGGVIS(-17.33)AIS(-8.05)E(-8.05)AAAQ(-4.07)Y(4.07)N(-9.28)PE(-21.36)PPPPR(-42.98)	16	3	-0.0051606	By matching	By MS/MS		135360000	135360000	0	0	NaN	65991000	69369000	0	NaN	NaN	NaN
A8KAM9;Q9UNP9;E9PK21;E9PEQ6	9;9;9;9	A8KAM9	A8KAM9	Peptidyl-prolyl cis-trans isomerase E;Peptidyl-prolyl cis-trans isomerase	PPIE		0.999962	45.4389	0.000110659	71.555	54.23	71.555	0.999962	45.4389	0.000110659	71.555	0.999835	38.9025	0.000632568	67.08	0.999603	35.8527	0.000475395	57.003		1	Y	_______MATTKRVLYVGGLAEEVDDKVLHA	X;X;X;X;X;X;X;X;X;X;X;X;X;X;X;B2;X;X;X;X;X;X;X;X;X;X;X;X;X;X;X	XXXXXXXXXXXXXPPPPPPPPPPPPPPXXXX	VLY(1)VGGLAEEVDDK	VLY(45.44)VGGLAE(-45.44)E(-50.72)VD(-63.46)D(-66.5)K(-69.13)	3	2	-0.12308	By MS/MS	By matching	By MS/MS	87506000	87506000	0	0	3.1731	19382000	24578000	43546000	NaN	1.7418	3.2336
Q96D15;M0QZH0	125;74	Q96D15	Q96D15	Reticulocalbin-3	RCN3		0.634507	6.61356	0.000110659	71.555	53.691	45.879	0.634507	6.61356	0.00224657	45.879	0	0		NaN	0.575421	3.48641	0.000110659	71.555		1	Y	QQRHIRDSVSAAWDTYDTDRDGRVGWEELRN	X;X;X;X;X;X;X;X;X;X;X;X;X;X;X;B2;X;X;X;X;X;X;X;X;X;X;X;X;X;X;X	XXXXXXPPPPPPPPPPPPPPXXXXXXXXXXX	D(0.001)S(0.001)VS(0.001)AAW(0.007)D(0.032)T(0.138)Y(0.635)D(0.124)T(0.028)D(0.028)R(0.006)	D(-29.63)S(-29.63)VS(-27.61)AAW(-19.76)D(-12.93)T(-6.61)Y(6.61)D(-7.1)T(-13.55)D(-13.55)R(-20.41)	10	2	-0.58934	By MS/MS	By matching	By MS/MS	51157000	51157000	0	0	2.3636	17958000	18759000	14440000	2.7637	2.2737	2.094
C9J0J7;G5E9Q6;B4DNH1;D3DNI2;D3DNI3;C9J712;C9JQ45;P35080	50;99;99;293;293;50;99;99	C9J0J7	C9J0J7	Profilin;Profilin-2	PFN2		0.8354	10.4373	0.000111317	69.979	47.831	69.979	0.430801	0	0.0153728	48.44	0.8354	10.4373	0.000111317	69.979	0.72561	7.35376	0.000647273	54.198		1	Y	CTMDIRTKSQGGEPTYNVAVGRAGRALVIVM	X;X;X;X;X;X;X;X;X;X;X;X;X;X;X;B2;X;X;X;X;X;X;X;X;X;X;X;X;X;X;X	XXXXXXXXPPPPPPPPPPPPPPXXXXXXXXX	SQGGE(0.013)PT(0.076)Y(0.835)N(0.076)VAVGR	S(-36.11)Q(-36.11)GGE(-18.05)PT(-10.44)Y(10.44)N(-10.44)VAVGR(-43.86)	8	2	0.38759		By MS/MS	By MS/MS	38422000	38422000	0	0	0.48836	0	18953000	19469000	0	0.64456	0.67849
A0A1W2PR36;V9HWB2;Q14353	199;222;222	A0A1W2PR36	A0A1W2PR36	Guanidinoacetate N-methyltransferase	HEL-S-20;GAMT		0.499999	0	0.000111425	69.92	45.065	69.92	0.499999	0	0.000580096	69.92	0.499966	0	0.000144302	62.408	0.499991	0	0.000111425	69.721		1	Y	IRTEVMALVPPADCRYYAFPQMITPLVTKG_	X;X;X;X;X;X;X;X;X;X;X;X;X;X;X;B2;X;X;X;X;X;X;X;X;X;X;X;X;X;X;X	XXXXXXXXXXXXXXXPPPPPPPPPPPPPPXX	Y(0.5)Y(0.5)AFPQMITPLVTK	Y(0)Y(0)AFPQ(-54.08)M(-58.28)IT(-64.82)PLVT(-69.51)K(-69.92)	1	3	-2.0388	By matching	By MS/MS	By MS/MS	168950000	168950000	0	0	NaN	0	57055000	74672000	NaN	NaN	NaN
A0A1W2PR36;V9HWB2;Q14353	200;223;223	A0A1W2PR36	A0A1W2PR36	Guanidinoacetate N-methyltransferase	HEL-S-20;GAMT		0.499999	0	0.000111425	69.92	45.065	69.92	0.499999	0	0.000580096	69.92	0.499966	0	0.000144302	62.408	0.499991	0	0.000111425	69.721		1	Y	RTEVMALVPPADCRYYAFPQMITPLVTKG__	X;X;X;X;X;X;X;X;X;X;X;X;X;X;X;X;X;X;X;X;X;X;X;X;X;X;X;X;X;X;X	XXXXXXXXXXXXXXXXXXXXXXXXXXXXXXX	Y(0.5)Y(0.5)AFPQMITPLVTK	Y(0)Y(0)AFPQ(-54.08)M(-58.28)IT(-64.82)PLVT(-69.51)K(-69.92)	2	3	-2.0388	By matching	By MS/MS	By MS/MS	168950000	168950000	0	0	NaN	0	57055000	74672000	NaN	NaN	NaN
Q8IWX8;Q59ET1;B4DL82;B4DPM4;J3QK89	897;380;382;436;908	Q8IWX8	Q8IWX8	Calcium homeostasis endoplasmic reticulum protein	CHERP		0.725074	7.34952	0.000113095	65.719	56.287	65.719	0	0		NaN	0.725074	7.34952	0.000113095	65.719						1	Y	QYKGVGVALDDPYENYRRNKSYSFIARMKAR	X;X;X;X;X;X;X;X;X;X;X;X;X;X;X;B2;X;X;X;X;X;X;X;X;X;X;X;X;X;X;X	XXXPPPPPPPPPPPPPPXXXXXXXXXXXXXX	GVGVALDDPY(0.005)E(0.02)N(0.117)Y(0.725)R(0.133)	GVGVALD(-41.63)D(-35.95)PY(-21.95)E(-15.61)N(-7.93)Y(7.35)R(-7.35)	13	2	-0.41791	By matching	By MS/MS		27663000	27663000	0	0	1.0602	11506000	16157000	0	2.1141	1.8096	0
P02786;A8K6Q8;G3V0E5	168;168;87	P02786	P02786	Transferrin receptor protein 1;Transferrin receptor protein 1, serum form	TFRC		0.961392	14.7174	0.000113184	78.342	63.566	78.342	0.961392	14.7174	0.000113184	78.342										1	Y	VPREAGSQKDENLALYVENQFREFKLSKVWR	X;X;X;X;X;X;X;X;X;X;X;X;X;X;X;B2;X;X;X;X;X;X;X;X;X;X;X;X;X;X;X	XXXXXXXXXPPPPPPPPPPPPPXXXXXXXXX	DEN(0.001)LALY(0.961)VE(0.032)N(0.005)Q(0.001)FR	D(-47.73)E(-47.73)N(-32.34)LALY(14.72)VE(-14.72)N(-23.03)Q(-31.04)FR(-46.01)	7	2	-0.46851	By MS/MS			0	0	0	0	NaN	0	0	0	NaN	NaN	NaN
Q08J23;A0A140T9Y7	38;38	Q08J23	Q08J23	tRNA (cytosine(34)-C(5))-methyltransferase	NSUN2		0.916629	10.755	0.000113295	65.241	45.538	65.241					0.769155	5.51371	0.000291798	60	0.916629	10.755	0.000113295	65.241		1	Y	AEGGGKRGEAGWEGGYPEIVKENKLFEHYYQ	X;X;X;X;X;X;X;X;X;X;X;X;X;X;X;B2;X;X;X;X;X;X;X;X;X;X;X;X;X;B2;X	XXXXXXXPPPPPPPPPPPPPPXXXXXXXXXX	GEAGWE(0.005)GGY(0.917)PE(0.077)IVK(0.001)	GE(-54.14)AGW(-39.94)E(-22.44)GGY(10.75)PE(-10.75)IVK(-29.58)	9	2	-0.85697		By MS/MS	By MS/MS	114690000	114690000	0	0	3.0139	0	51814000	62873000	0	4.7867	3.6555
A0A024QZK8;P31942;Q53F48;B4DHY1;A0A024QZP1	296;296;296;188;165	A0A024QZK8	A0A024QZK8	Heterogeneous nuclear ribonucleoprotein H3	HNRPH3;HNRNPH3		0.976424	16.7615	0.00011332	84.309	78.816	84.309	0.976424	16.7615	0.000141327	84.309	0.916547	10.8429	0.00147843	49.081	0.951962	13.893	0.00011332	65.179		1	Y	GMGGYGRDGMDNQGGYGSVGRMGMGNNYSGG	X;X;X;X;X;X;X;X;X;X;X;X;X;X;X;B2;X;X;X;X;X;X;X;X;X;X;X;X;X;X;X	XXXXXXXPPPPPPPPPPPPPPXXXXXXXXXX	DGMDNQ(0.003)GGY(0.976)GS(0.021)VGR	D(-62.91)GM(-63.52)D(-61.01)N(-50.08)Q(-25.42)GGY(16.76)GS(-16.76)VGR(-37.35)	9	2	-0.047668	By MS/MS	By MS/MS	By MS/MS	255700000	255700000	0	0	6.1246	74812000	90980000	89913000	6.4627	5.8623	6.1355
Q9Y2W1;A0A3B3ITZ9;Q7Z5U1;Q05D20;Q6P0P7;Q6PJV4	328;328;328;328;328;328	Q9Y2W1	Q9Y2W1	Thyroid hormone receptor-associated protein 3	THRAP3		0.542209	5.4324	0.000113836	63.944	53.618	63.944	0.527529	6.23634	0.0014704	53.08	0.542209	5.4324	0.000113836	63.944	0	0		NaN		1	Y	KKSPVGKSPPSTGSTYGSSQKEESAASGGAA	X;X;X;X;X;X;X;X;X;X;X;X;X;X;X;B2;X;X;X;X;X;X;X;X;X;X;X;X;X;X;X	XXXXXXXPPPPPPPPPPPPPPXXXXXXXXXX	SPPS(0.003)T(0.018)GS(0.046)T(0.155)Y(0.542)GS(0.046)S(0.057)Q(0.057)K(0.075)	S(-58.45)PPS(-22.78)T(-14.75)GS(-10.73)T(-5.43)Y(5.43)GS(-10.73)S(-9.75)Q(-9.75)K(-8.59)	9	2	0.32432	By matching	By MS/MS	By matching	51409000	51409000	0	0	NaN	10157000	20763000	20489000	NaN	NaN	NaN
A0A0S2Z2Z6;P08133;A8K3Q7;Q6ZP35;E7EMC6;E5RFF0;A0A0S2Z301;E5RIU8;E5RJR0;E5RI05;A0A0S2Z377;E5RK69	30;30;30;30;30;30;30;30;30;30;30;30	A0A0S2Z2Z6;A0A0S2Z377	A0A0S2Z2Z6	Annexin A6;Annexin	ANXA6		0.605028	4.79834	0.000114551	49.662	43.816	49.662					0.605028	4.79834	0.000114551	49.662						1	Y	HDFPGFDPNQDAEALYTAMKGFGSDKEAILD	X;X;X;X;X;X;X;X;X;X;X;X;X;X;X;B2;X;X;X;X;X;X;X;X;X;X;X;X;X;X;X	PPPPPPPPPPPPPPPPPPPPXXXXXXXXXXX	GSIHDFPGFD(0.001)PN(0.006)Q(0.009)D(0.009)AE(0.024)ALY(0.605)T(0.2)AM(0.068)K(0.077)	GS(-48.95)IH(-48.98)D(-47.89)FPGFD(-29.67)PN(-19.82)Q(-18.35)D(-18.35)AE(-13.99)ALY(4.8)T(-4.8)AM(-9.46)K(-8.94)	19	3	-1.1558		By MS/MS		58644000	58644000	0	0	0.43362	0	58644000	0	0	1.4179	0
A0A024R904;Q9HB71;Q6NVY0	90;90;90	A0A024R904	A0A024R904	Calcyclin-binding protein	CACYBP		0.776289	11.0064	0.000115846	69.98	51.712	69.98	0	0		NaN	0.776289	11.0064	0.000115846	69.98	0	0		NaN		1	Y	ISNYGWDQSDKFVKIYITLTGVHQVPTENVQ	X;B2;B2;X;X;X;X;X;X;X;X;X;X;X;X;B2;X;X;X;X;X;X;X;X;X;X;X;X;X;X;X	XXXXXXXXXXXXXXPPPPPPPPPPPPPPPPP	IY(0.776)IT(0.047)LT(0.054)GVH(0.061)Q(0.062)VPTENVQVHFTER	IY(11.01)IT(-12.18)LT(-11.61)GVH(-11.03)Q(-11.01)VPT(-36.07)E(-43.97)N(-51.26)VQ(-57.55)VH(-67.05)FT(-69.04)E(-69.04)R(-69.02)	2	4	0.85319	By matching	By MS/MS	By matching	150710000	150710000	0	0	0.42824	54191000	62935000	33583000	0.25221	0.63304	0.89196
B3KNU0;P52306;D6RHH8	118;118;77	B3KNU0	B3KNU0	Rap1 GTPase-GDP dissociation stimulator 1	RAP1GDS1		0.722543	5.1652	0.000116035	87.026	83.585	62.732	0.660429	2.97247	0.000116035	87.026	0.722543	5.1652	0.000145692	62.732						1	Y	QEVLLQTGRALGNICYDSHEGRSAVDQAGGA	X;X;X;X;X;X;X;X;X;X;X;X;X;X;X;B2;X;X;X;X;X;X;X;X;X;X;X;X;X;X;X	XXXXXXXXXPPPPPPPPPPPPPXXXXXXXXX	ALGN(0.016)IC(0.22)Y(0.723)D(0.041)S(0.001)HEGR	ALGN(-16.66)IC(-5.17)Y(5.17)D(-12.45)S(-30.3)H(-40.18)E(-44.09)GR(-49.41)	7	3	-0.39488	By MS/MS	By MS/MS		57921000	57921000	0	0	NaN	28153000	29768000	0	NaN	NaN	NaN
Q9NZ63;Q6GVN4	228;149	Q9NZ63	Q9NZ63	Uncharacterized protein C9orf78	C9orf78		0.983349	17.8061	0.000116497	83.862	69.182	83.862	0.983349	17.8061	0.000116497	83.862	0.845796	7.55545	0.000455139	64.103	0.952959	13.3333	0.000429466	65.5		1	Y	VPTNMAVNYVQHNRFYHEELNAPIRRNKEEP	X;X;X;X;X;X;X;X;X;X;X;X;X;X;X;B2;X;X;X;X;X;X;X;X;X;X;X;X;X;X;X	XXXXXXXXXXXXXXPPPPPPPPPPPXXXXXX	FY(0.983)H(0.016)EELNAPIR	FY(17.81)H(-17.81)E(-34.56)E(-49.99)LN(-70.05)APIR(-83.86)	2	3	0.71104	By MS/MS	By MS/MS	By MS/MS	70727000	70727000	0	0	5.196	17288000	28039000	25400000	3.3586	6.3205	6.3056
Q13151	180	Q13151	Q13151	Heterogeneous nuclear ribonucleoprotein A0	HNRNPA0		0.977437	20.1812	0.000122462	90.964	75.335	74.987	0.940254	16.1192	0.00075617	51.569	0.977437	20.1812	0.000122462	90.964	0.896179	12.9982	0.000129077	74.987		1	Y	GHRVEVKKAVPKEDIYSGGGGGGSRSSRGGR	X;X;X;X;X;X;X;X;X;X;X;X;X;X;X;B2;X;X;X;X;X;X;X;X;X;X;X;X;X;X;X	XXXXXXXXXXXXPPPPPPPPPPPPPXXXXXX	E(0.009)D(0.009)IY(0.977)S(0.004)GGGGGGSR	E(-20.18)D(-20.18)IY(20.18)S(-24.09)GGGGGGS(-59.05)R(-61.85)	4	3	0.072962	By MS/MS	By MS/MS	By MS/MS	129350000	129350000	0	0	1.1731	57382000	38939000	33029000	2.6723	1.0172	0.65391
Q6FGS1;A0A087WYR3;O43399;Q53GA0;Q5J908;B4DDV4	106;106;106;106;106;57	Q6FGS1	Q6FGS1	Tumor protein D54	TPD52L2		0.937712	15.2629	0.00012772	73.927	60.348	66.989					0.937712	15.2629	0.000133722	66.989	0.927251	13.7701	0.00012772	73.927		1	Y	QNLSRSWHDVQVSSAYVKTSEKLGEWNEKVT	X;X;X;X;X;X;X;X;X;X;X;X;X;X;X;B2;X;X;X;X;X;X;X;X;X;X;X;X;X;X;X	XXXXXPPPPPPPPPPPPPXXXXXXXXXXXXX	SWHDVQVS(0.006)S(0.028)AY(0.938)VK(0.028)	S(-63.79)W(-60.3)H(-55.73)D(-50.64)VQ(-38.71)VS(-21.71)S(-15.26)AY(15.26)VK(-15.26)	11	3	-0.62213		By MS/MS	By MS/MS	793440000	793440000	0	0	23.012	0	402620000	390820000	0	29.371	32.649
A0A087X0H9;Q5T8P6	81;81	A0A087X0H9	A0A087X0H9	RNA-binding protein 26	RBM26		0.499998	0	0.000128871	66.267	53.213	66.267	0	0		NaN	0.499998	0	0.000128871	66.267	0.499949	0	0.00571504	49.466		1	Y	QIFVEKLFDAVNTKSYLPPPEQPSSGSLKVE	X;X;X;X;X;X;X;X;X;X;X;X;X;X;X;X;X;X;X;X;X;X;X;X;X;X;X;X;X;X;X	XXXXXXXXXXXXXXXXXXXXXXXXXXXXXXX	S(0.5)Y(0.5)LPPPEQPSSGSLK	S(0)Y(0)LPPPE(-53.91)Q(-53.91)PS(-62.55)S(-64.71)GS(-64.76)LK(-64.68)	2	2	-0.39372	By matching	By MS/MS	By matching	36116000	36116000	0	0	NaN	12363000	10811000	12942000	NaN	NaN	NaN
V9HW92;O00151	306;306	V9HW92	V9HW92	PDZ and LIM domain protein 1	HEL-S-112;PDLIM1		0.76783	9.94897	0.000129135	72.089	67.331	72.089	0.632142	6.71901	0.000137377	62.924	0.76783	9.94897	0.000129135	72.089	0.745228	9.35069	0.00058551	53.967		1	Y	TNLKQKGHFFVEDQIYCEKHARERVTPPEGY	X;X;X;X;X;X;X;X;X;X;X;X;X;X;X;B2;X;X;X;X;X;X;X;X;X;B2;X;X;B2;X;X	XXXXXXPPPPPPPPPPPPPXXXXXXXXXXXX	GHFFVEDQ(0.024)IY(0.768)C(0.065)E(0.065)K(0.078)	GH(-69.6)FFVE(-43.28)D(-34.66)Q(-15.07)IY(9.95)C(-10.71)E(-10.71)K(-9.95)	10	3	-0.37985	By MS/MS	By MS/MS	By MS/MS	167300000	167300000	0	0	1.6527	55484000	52847000	58971000	1.8601	1.2759	1.9671
Q7Z426;Q92734;Q7Z427	395;399;357	Q7Z426	Q7Z426	Protein TFG	TFG		0.781618	7.32067	0.000129454	56.774	37.02	51.888	0.766551	5.30739	0.000129454	56.774	0.781618	7.32067	0.000232313	51.888						1	Y	NRPPFGQGYTQPGPGYR______________	X;X;X;X;X;X;X;X;X;X;X;X;X;X;X;B2;X;X;X;X;X;X;X;X;X;X;X;X;X;X;X	PPPPPPPPPPPPPPPPPXXXXXXXXXXXXXX	NRPPFGQ(0.001)GY(0.021)T(0.019)Q(0.033)PGPGY(0.782)R(0.145)	N(-43.1)R(-43.1)PPFGQ(-30.35)GY(-15.69)T(-16.13)Q(-13.79)PGPGY(7.32)R(-7.32)	16	3	0.51766	By MS/MS	By MS/MS		102230000	102230000	0	0	NaN	44767000	57467000	0	NaN	NaN	NaN
V9HWF4;P00558;B4E1H9;A0A140VJR3;P07205;V9HW85	161;161;71;161;161;161	V9HWF4	V9HWF4	Phosphoglycerate kinase;Phosphoglycerate kinase 1;Phosphoglycerate kinase 2	HEL-S-68p;PGK1;PGK2;HEL-S-272		0.775528	5.52117	0.000129665	57.53	37.691	57.53	0.775528	5.52117	0.000129665	57.53	0	0		NaN	0	0		NaN		1	Y	KIEAFRASLSKLGDVYVNDAFGTAHRAHSSM	X;X;X;X;X;X;X;X;X;X;X;X;X;X;X;B2;X;X;X;X;X;X;X;X;X;X;X;X;X;X;X	XXXXXXXXXXXPPPPPPPPPPPPPPPXXXXX	LGD(0.218)VY(0.776)VN(0.006)D(0.001)AFGTAHR	LGD(-5.52)VY(5.52)VN(-21)D(-30.28)AFGT(-42.97)AH(-46.47)R(-46.27)	5	3	-0.3615	By MS/MS	By matching	By matching	56797000	56797000	0	0	NaN	13875000	19740000	23181000	NaN	NaN	NaN
F5H8D7;A0A024R0S8;Q59HH7;P18887;B2RCY5	520;551;565;551;551	F5H8D7	F5H8D7	DNA repair protein XRCC1	XRCC1		0.993666	22.6077	0.000129956	71.176	54.602	71.176	0.989193	22.6077	0.000129956	71.176	0.967631	16.4009	0.000393088	57.802	0.993666	22.6077	0.000129956	71.176		1	Y	VPELPDFFQGKHFFLYGEFPGDERRKLIRYV	X;X;X;X;X;X;X;X;X;X;X;X;X;X;X;B2;X;X;X;X;X;X;X;X;X;X;X;X;X;X;X	XXXXXXXXXXXPPPPPPPPPPPPPXXXXXXX	H(0.001)FFLY(0.994)GE(0.005)FPGDER	H(-30.62)FFLY(22.61)GE(-22.61)FPGD(-48.6)E(-53.96)R(-53.51)	5	3	-0.90294	By MS/MS	By MS/MS	By MS/MS	219330000	219330000	0	0	NaN	34822000	41179000	56815000	NaN	NaN	NaN
Q8N1H4;Q68DZ9;Q59GA1;B2RDQ3;P62995;H7BXF3;H7C2L4	171;195;195;207;207;66;27	Q8N1H4	Q8N1H4	Transformer-2 protein homolog beta	DKFZp686F18120;TRA2B		0.793389	6.78641	0.000130043	64.827	21.58	64.827	0.528975	2.8265	0.000606097	53.034	0.785074	6.08232	0.000131098	63.602	0.793389	6.78641	0.000130043	64.827		1	Y	DFSITKRPHTPTPGIYMGRPTYGSSRRRDYY	X;X;X;X;X;X;X;X;X;X;X;X;X;X;X;B2;X;X;X;X;X;B2;X;X;X;X;X;X;X;X;X	XXXXXXPPPPPPPPPPPPPXXXXXXXXXXXX	RPHTPTPGIY(0.793)M(0.166)GR(0.04)	R(-54.48)PH(-50.81)T(-46.73)PT(-39.18)PGIY(6.79)M(-6.79)GR(-12.95)	10	4	-0.8875	By MS/MS	By MS/MS	By MS/MS	165250000	165250000	0	0	6.6241	38874000	33432000	92948000	5.4904	4.6683	8.6822
B3KSG3;F8W8M4;A0A2Z4N5U1;A0A0A0MRL6;A0A3B3IS55;O14639;B4DQA3;J3QSX6;B7Z4H1;A0A494C1P1;A0A494C1G0;H0Y7N6;F6XFR5	249;401;461;429;477;461;145;119;385;309;385;126;145	B3KSG3	B3KSG3	Actin-binding LIM protein 1	ABLIM1		0.858682	8.3271	0.000131294	80.979	57.423	80.979	0.858682	8.3271	0.000131294	80.979	0.790161	7.01768	0.000276169	60.255	0.810777	7.01768	0.000688203	60.255		1	Y	MIHRSTSQGSINSPVYSRHSYTPTTSRSPQH	X;X;X;X;X;X;X;X;X;X;X;X;X;X;X;B2;X;X;X;X;X;X;X;X;X;X;X;X;X;X;X	XXXXPPPPPPPPPPPPPPXXXXXXXXXXXXX	STSQGSINSPVY(0.859)S(0.126)R(0.015)	S(-71.55)T(-71.55)S(-71.79)Q(-71.79)GS(-65.09)IN(-49.14)S(-41.06)PVY(8.33)S(-8.33)R(-17.57)	12	2	-0.08807	By MS/MS	By MS/MS	By matching	31348000	31348000	0	0	7.4359	9980700	13648000	7719100	NaN	6.5326	3.6299
F8VY04;A0A5K1VW67;F8W1A4;A0A140VK93;P54819;B4DLK2;F8VZG5;A0A5F9ZHP2;F8VPP1;G3V213	12;12;12;12;12;12;12;12;12;12	F8VY04	F8VY04	Adenylate kinase 2, mitochondrial;Adenylate kinase 2, mitochondrial;Adenylate kinase 2, mitochondrial, N-terminally processed	AK2		0.63654	4.03462	0.000133722	66.989	58.388	60.157	0.63654	4.03462	0.000274909	60.157	0.633741	4.03462	0.000274909	60.157	0.606579	3.22854	0.000133722	66.989		1	Y	____MAPSVPAAEPEYPKGIRAVLLGPPGAG	X;X;X;X;X;X;X;X;X;X;X;X;X;X;X;B2;X;X;X;X;X;X;X;X;X;X;X;X;X;X;X	XXXXXPPPPPPPPPPPPPXXXXXXXXXXXXX	APSVPAAE(0.021)PE(0.091)Y(0.637)PK(0.251)	APS(-49.8)VPAAE(-14.88)PE(-8.43)Y(4.03)PK(-4.03)	11	3	-0.11475	By MS/MS	By MS/MS	By MS/MS	228650000	228650000	0	0	15.428	75618000	68939000	81966000	21.353	10.972	16.407
A0A090N8Y2;A0A499FI48;P13667	392;393;392	A0A090N8Y2	A0A090N8Y2	Protein disulfide-isomerase A4	ERP70;PDIA4		1	84.2028	0.00013395	98.523	75.169	87.181	1	95.5448	0.00013395	98.523	1	77.9419	0.000389431	82.241	1	84.2028	0.000252534	87.181		1	Y	QGSTQDSAIKDFVLKYALPLVGHRKVSNDAK	X;X;X;X;X;X;X;X;X;X;X;X;X;X;X;B2;X;X;X;X;X;X;X;X;X;X;X;X;X;X;X	XXXXXXXXXXXXXXXPPPPPPPPPXXXXXXX	Y(1)ALPLVGHR	Y(84.2)ALPLVGH(-84.2)R(-87.18)	1	3	-0.44836	By MS/MS	By MS/MS	By MS/MS	44519000	44519000	0	0	11.861	16151000	13680000	14688000	27.502	7.3027	11.362
Q9BWJ5	5	Q9BWJ5	Q9BWJ5	Splicing factor 3B subunit 5	SF3B5		0.499943	0	0.000134833	80.853	63.859	80.853	0.493834	0	0.001008	50.116	0.499943	0	0.000136581	80.853	0.498768	0	0.000134833	65.753		1	Y	___________MTDRYTIHSQLEHLQSKYIG	X;X;X;X;X;X;X;X;X;X;X;X;X;X;X;B2;X;X;X;X;X;X;X;X;X;X;X;X;B2;X;X	XXXXXXXXXXXXXXXPPPPPPPPPPPPPXXX	Y(0.5)T(0.5)IHSQLEHLQSK	Y(0)T(0)IH(-36.98)S(-45.84)Q(-58.5)LE(-66.25)H(-71.49)LQ(-78)S(-80.11)K(-80.81)	1	3	0.34938		By MS/MS		291610000	291610000	0	0	NaN	0	291610000	0	NaN	NaN	NaN
A0A024R649;Q96EK6;G3V5E4	170;170;99	A0A024R649	A0A024R649	Glucosamine 6-phosphate N-acetyltransferase	GNPNAT1		0.850603	7.6663	0.0001353	65.234	61.127	65.234	0.783004	6.27304	0.00210333	43.798	0.850603	7.6663	0.0001353	65.234	0.780754	5.91128	0.00135367	57.347		1	Y	LECLPQNVGFYKKFGYTVSEENYMCRRFLK_	X;X;X;X;X;X;X;X;X;X;X;B2;X;X;X;B2;X;X;X;X;X;X;X;X;X;X;X;X;X;X;X	XXXXXXXXXXXXXPPPPPPPPPPPPPXXXXX	FGY(0.851)T(0.146)VS(0.004)EENYMCR	FGY(7.67)T(-7.67)VS(-23.85)E(-34.9)E(-44.85)N(-51.05)Y(-55.11)M(-61.6)C(-64.83)R(-65.2)	3	3	-1.7787	By MS/MS	By MS/MS	By matching	50457000	50457000	0	0	NaN	16238000	16087000	0	NaN	NaN	NaN
V9HWH9;B2R5H0;P31949	30;30;30	V9HWH9	V9HWH9	Protein S100;Protein S100-A11;Protein S100-A11, N-terminally processed	HEL-S-43;S100A11		0.868068	8.1943	0.000135323	100.25	92.194	100.25	0	0		NaN	0.833525	7.03115	0.000964535	66.962	0.868068	8.1943	0.000135323	100.25		1	Y	ESLIAVFQKYAGKDGYNYTLSKTEFLSFMNT	X;X;X;X;X;X;X;X;X;X;X;X;X;X;X;B2;X;X;X;X;X;X;X;X;X;X;X;X;X;X;X	XXXXXXXXXXXXXPPPPPPPPPXXXXXXXXX	D(0.132)GY(0.868)NYTLSK	D(-8.19)GY(8.19)N(-33.68)Y(-69.45)T(-79.68)LS(-93.55)K(-98.6)	3	3	-0.41196	By matching	By MS/MS	By MS/MS	627830000	627830000	0	0	1.5754	147240000	203830000	217420000	1.4133	1.5805	1.3148
H3BTD3;A0A024R5U3;H3BMD8;P56211;A6NMQ3;Q5T5H1;O43768;A0A1W2PRU0;H3BQ52	49;65;84;65;93;86;70;68;24	H3BTD3;A6NMQ3	A6NMQ3	cAMP-regulated phosphoprotein 19;Alpha-endosulfine	ARPP19;ARPP-19;ENSA		0.942509	15.4941	0.000135651	87.476	80.079	66.299	0.942509	15.4941	0.000704377	66.299	0.810468	7.86542	0.000704377	66.299	0.882508	9.74402	0.000135651	87.476		1	Y	LRMKSVEQKYFDSGDYNMAKAKMKNKQLPSA;RKRLQKGQKYFDSGDYNMAKAKMKNKQLPTA	X;X;X;X;X;X;X;X;X;X;X;X;X;X;X;B2;X;X;X;X;X;X;X;X;X;X;X;X;X;X;X	XXXXXXXXXPPPPPPPPPPPXXXXXXXXXXX	YFDS(0.007)GD(0.027)Y(0.943)N(0.019)M(0.004)AK(0.001)	Y(-51.04)FD(-34.54)S(-21.55)GD(-15.49)Y(15.49)N(-16.88)M(-24.11)AK(-29.92)	7	2	-0.92116	By MS/MS	By MS/MS	By MS/MS	382480000	382480000	0	0	NaN	103220000	142570000	136690000	NaN	NaN	NaN
B4DVJ1;B4DVH8;A0A024QZX9;B4DQQ6;E7ET49;Q8NCG7	98;227;73;168;313;354	B4DVJ1	B4DVJ1	Sn1-specific diacylglycerol lipase beta	LOC221955;DAGLB		0.944121	12.2778	0.000135888	80.312	56.883	80.312	0.611418	1.96857	0.000137146	63.181					0.944121	12.2778	0.000135888	80.312		1	Y	LQYRDFIHVSFHDKVYELPFLVALDHRKESV	X;X;X;X;X;X;X;X;X;X;X;X;X;X;X;B2;X;X;X;X;X;X;X;X;X;X;X;X;X;X;X	XXXXXXXXXXXXXXPPPPPPPPPPPPPXXXX	VY(0.944)E(0.056)LPFLVALDHR	VY(12.28)E(-12.28)LPFLVALD(-73.11)H(-77.68)R(-79.64)	2	3	-0.15694	By MS/MS		By MS/MS	30744000	30744000	0	0	NaN	7635400	0	23109000	NaN	NaN	NaN
A0A1X7SBZ2;A0A5H1ZRQ2;Q59F66;Q92841	519;519;521;519	A0A1X7SBZ2	A0A1X7SBZ2	Probable ATP-dependent RNA helicase DDX17	DDX17		0.920075	11.4788	0.00013676	63.611	53.38	63.611	0.920075	11.4788	0.00013676	63.611	0.715081	4.87663	0.0011593	49.243	0.721207	4.3612	0.000458749	56.493		1	Y	HRIGRTARSTNKGTAYTFFTPGNLKQARELI	X;X;X;X;X;X;X;X;X;X;X;X;X;X;X;B2;X;X;X;X;X;X;X;X;X;X;X;X;X;X;X	XXXXXXXXXXXXPPPPPPPPPPPPPXXXXXX	GT(0.014)AY(0.92)T(0.065)FFTPGNLK	GT(-18.1)AY(11.48)T(-11.48)FFT(-36.08)PGN(-54.25)LK(-59.62)	4	3	-0.61886	By MS/MS	By MS/MS	By MS/MS	101670000	101670000	0	0	3.0498	32395000	27396000	41875000	NaN	1.5447	2.6844
A8K2B4;A0A4D6J698;A0A097PID1;A0A097PIC4;A0A0U1RRM6;Q8N8S7;A0A075B6E5	38;38;38;38;38;38;38	A8K2B4	A8K2B4	Protein enabled homolog	ENAH		0.935965	11.9281	0.000137153	92.247	88.239	92.247					0.935965	11.9281	0.000137153	92.247	0.89685	11.2119	0.000304383	74.392		1	Y	WVPAGGSTGFSRVHIYHHTGNNTFRVVGRKI	X;X;X;X;X;X;X;X;X;X;X;X;X;X;X;B2;X;X;X;X;X;X;X;X;X;X;X;X;X;X;X	XXXXXXXXXXXXPPPPPPPPPPPPPXXXXXX	VH(0.06)IY(0.936)H(0.004)HTGNNTFR	VH(-11.93)IY(11.93)H(-23.73)H(-45.21)T(-57.48)GN(-72.97)N(-81.77)T(-81.77)FR(-87.26)	4	4	0.48509		By MS/MS	By MS/MS	49219000	49219000	0	0	NaN	0	28945000	20274000	NaN	NaN	NaN
Q15056;Q75MU1;B4DMV6;Q75MU2;A4D198	101;101;101;101;167	Q15056	Q15056	Eukaryotic translation initiation factor 4H	EIF4H;WBSCR1;LOC392647		0.783922	6.15422	0.000139769	90.05	64.878	83.081	0.741365	7.63365	0.000139769	90.05	0.783922	6.15422	0.00023677	83.081	0.731526	7.63365	0.000139769	90.05		1	Y	YVEFDEVDSLKEALTYDGALLGDRSLRVDIA	X;X;X;X;X;X;X;X;X;X;X;X;X;X;X;B2;X;X;X;X;X;X;X;X;X;X;X;X;X;X;X	XXXXXXXXXXXPPPPPPPPPPPPPXXXXXXX	E(0.002)ALT(0.19)Y(0.784)D(0.024)GALLGDR	E(-25.73)ALT(-6.15)Y(6.15)D(-15.15)GALLGD(-64.81)R(-71.22)	5	2	-0.81735	By MS/MS	By MS/MS	By MS/MS	528980000	528980000	0	0	0.53176	109000000	196500000	223480000	0.32261	0.68819	0.60177
B7Z6N1;A0A024R0L4;P50548	324;334;334	B7Z6N1	B7Z6N1	ETS domain-containing transcription factor ERF	ERF		0.783241	5.58093	0.00014204	53.782	40.428	53.782	0	0		NaN	0.783241	5.58093	0.00014204	53.782	0	0		NaN		1	Y	QSVYNYHLSPRAFLHYPGLVVPQPQRPDKCP	X;X;X;X;X;X;X;X;X;X;X;X;X;X;X;B2;X;X;X;X;X;X;X;X;X;X;X;X;X;X;X	XXXXXXXXXXXPPPPPPPPPPPPPPPPPPXX	AFLH(0.217)Y(0.783)PGLVVPQPQRPDK	AFLH(-5.58)Y(5.58)PGLVVPQ(-41.07)PQ(-50.68)R(-50.88)PD(-50.9)K(-51.26)	5	4	-0.92629	By matching	By MS/MS	By matching	76928000	76928000	0	0	NaN	15852000	28958000	32118000	NaN	NaN	NaN
B2RAH5;O14974;A0A024RBF1;H0YHI8;F8VZN8;A0A3B3ISH4;H0YIS4	496;496;496;100;496;164;191	B2RAH5	B2RAH5	Protein phosphatase 1 regulatory subunit;Protein phosphatase 1 regulatory subunit 12A	PPP1R12A		1	70.6038	0.000142155	89.698	71.879	89.698	1	67.1104	0.000142155	83.313	0.999954	43.8042	0.00279824	53.878	1	70.6038	0.00233519	89.698		1	Y	DNKEKEKDSKGTRLAYVAPTIPRRLASTSDI	X;X;X;X;X;X;X;X;X;X;X;X;X;X;X;B2;X;X;X;X;X;X;X;X;X;X;X;X;X;X;X	XXXXXXXXXXXXXPPPPPPPPPPXXXXXXXX	LAY(1)VAPTIPR	LAY(70.6)VAPT(-70.6)IPR(-84.91)	3	2	-1.666	By MS/MS	By MS/MS	By MS/MS	125870000	125870000	0	0	NaN	42214000	40628000	43029000	NaN	NaN	NaN
P30085;B4DDL4;Q5T0D2	27;59;59	P30085	P30085	UMP-CMP kinase	CMPK1		0.963553	15.0457	0.000145692	62.732	27.288	46.768	0.963553	15.0457	0.000145692	62.732	0.488583	0.998368	0.00167269	46.282	0.776216	6.3936	0.00105638	53.237		1	Y	PGAGKGTQCARIVEKYGYTHLSAGELLRDER	X;X;X;X;X;X;X;X;X;X;X;X;X;X;X;B2;X;X;X;X;X;X;X;X;X;X;X;X;X;X;X	XXXXXXXXXXXXXXXPPPPPPPPPPPPPXXX	Y(0.964)GY(0.03)T(0.004)H(0.002)LSAGELLR	Y(15.05)GY(-15.05)T(-23.31)H(-27.95)LS(-36.97)AGE(-43.69)LLR(-46.77)	1	3	0.82951	By MS/MS		By MS/MS	502620000	502620000	0	0	NaN	175300000	0	204170000	NaN	NaN	NaN
C9JTN7;B4E0E5;E5RG67;F8W8I6;Q59G98;P31483;E5RGV5;Q2TSD2;Q01085;A8K5C4;E7ETC0	10;10;10;10;48;10;10;12;12;12;12	C9JTN7;F8W8I6;Q2TSD2	C9JTN7	Nucleolysin TIA-1 isoform p40;Nucleolysin TIAR	TIA1;TIAL1		0.998469	28.1487	0.000147286	111.74	61.612	101.72	0.9814	17.2236	0.00023179	101.72	0.998116	27.2411	0.000147286	111.74	0.998469	28.1487	0.00023179	101.72		1	Y	______MEDEMPKTLYVGNLSRDVTEALILQ;____MMEDDGQPRTLYVGNLSRDVTEVLILQ	X;X;X;X;X;X;X;X;X;X;X;X;X;X;X;B2;X;X;X;X;X;X;X;X;X;X;X;X;X;X;X	XXXXXXXXXXXXXPPPPPPPPPXXXXXXXXX	T(0.002)LY(0.998)VGNLSR	T(-28.15)LY(28.15)VGN(-56.64)LS(-80.42)R(-87.56)	3	2	0.37859	By MS/MS	By MS/MS	By MS/MS	650430000	650430000	0	0	NaN	22161000	29136000	25513000	NaN	NaN	NaN
E7EVA0;P27816;B4DM10;A0A024R2V2;A0A024R2S1;Q6NX68;Q05D06;H7C456;A0A0J9YVV8;A0A0J9YW37	47;47;47;47;47;47;47;47;47;47	E7EVA0	E7EVA0	Microtubule-associated protein;Microtubule-associated protein 4	MAP4		0.795559	8.91135	0.000148394	88.948	61.986	88.948	0.780045	8.5082	0.000270581	80.986	0.678645	6.25883	0.000822618	56.725	0.795559	8.91135	0.000148394	88.948		1	Y	EAFDDVVGETVGKTDYIPLLDVDEKTGNSES	X;X;X;X;X;X;X;X;X;X;X;X;X;X;X;B2;X;X;X;X;X;X;X;X;X;X;X;X;X;X;X	XXXXXXXXXXXXXPPPPPPPPPPPPXXXXXX	T(0.102)D(0.102)Y(0.796)IPLLDVDEK	T(-8.91)D(-8.91)Y(8.91)IPLLD(-65.1)VD(-77.92)E(-84.61)K(-88.04)	3	2	-1.1022	By MS/MS	By MS/MS	By MS/MS	404460000	404460000	0	0	1.2356	19301000	10804000	21080000	0.13837	0.057515	NaN
P35249;C9J8M3;C9JZI1;C9JXZ7;C9JTT7;C9JGY5;F8WE44	77;77;77;77;77;77;77	P35249	P35249	Replication factor C subunit 4	RFC4		0.952985	13.5597	0.000148857	63.292	51.426	63.292	0.947727	15.031	0.00049286	45.207	0.952985	13.5597	0.000148857	63.292	0.942498	12.6889	0.000151493	57.095		1	Y	LKKSLEGADLPNLLFYGPPGTGKTSTILAAA	X;X;X;X;X;X;X;X;X;X;X;X;X;X;X;B2;X;X;X;X;X;X;X;X;X;X;X;X;X;X;X	XXXPPPPPPPPPPPPPPPPPPPPXXXXXXXX	SLEGAD(0.002)LPN(0.042)LLFY(0.953)GPPGT(0.001)GK(0.002)	S(-48.3)LE(-37.76)GAD(-26.04)LPN(-13.56)LLFY(13.56)GPPGT(-29.87)GK(-28.02)	13	2	-3.4114	By MS/MS	By MS/MS	By MS/MS	201400000	201400000	0	0	NaN	45368000	80870000	75163000	NaN	NaN	NaN
G3V1A4;V9HWI5;E9PK25;P23528;E9PP50;E9PQB7;E9PLJ3;B4E112;E9PS23	51;68;106;68;68;51;51;68;68	G3V1A4	G3V1A4	Cofilin-1	CFL1;HEL-S-15		0.864397	15.1933	0.000151403	59.185	26.964	59.185	0.864397	15.1933	0.000151403	59.185	0.71251	7.24142	0.000151462	57.804						1	Y	KEILVGDVGQTVDDPYATFVKMLPDKDCRYA	X;X;X;X;X;X;X;X;X;X;X;X;X;X;X;B2;X;X;X;X;X;X;X;X;X;X;X;X;X;B2;X	XPPPPPPPPPPPPPPPPPPPPXXXXXXXXXX	EILVGD(0.023)VGQ(0.017)T(0.017)VD(0.017)D(0.017)PY(0.864)AT(0.017)FVK(0.026)	E(-52.75)ILVGD(-15.8)VGQ(-16.98)T(-16.98)VD(-16.98)D(-16.98)PY(15.19)AT(-16.98)FVK(-15.19)	15	2	-1.9305	By MS/MS	By MS/MS		105370000	105370000	0	0	0.04463	59168000	46198000	0	0.11145	0.066235	0
F8VWH9;Q53F62;Q8N6T3;E5RHT6;E5RHC5;F8W1U7	101;175;175;101;175;101	F8VWH9	F8VWH9	ADP-ribosylation factor GTPase-activating protein 1	ARFGAP1		0.711398	7.46298	0.000151611	54.343	44.146	54.343	0	0		NaN	0.711398	7.46298	0.000151611	54.343						1	Y	SDKAFEDWLNDDLGSYQGAQGNRYVGFGNTP	X;X;X;X;X;X;X;X;X;X;X;X;X;X;X;B2;X;X;X;X;X;X;X;X;X;X;X;X;X;X;X	XXXPPPPPPPPPPPPPPPPPPPPXXXXXXXX	AFEDW(0.002)LN(0.007)D(0.007)D(0.007)LGS(0.128)Y(0.711)Q(0.128)GAQ(0.008)GN(0.001)R(0.001)	AFE(-32.79)D(-32.79)W(-26.66)LN(-20.08)D(-20.08)D(-20.08)LGS(-7.46)Y(7.46)Q(-7.46)GAQ(-19.66)GN(-27.8)R(-27.37)	13	2	0.47023	By matching	By MS/MS		23440000	23440000	0	0	0.19457	10673000	12767000	0	0.48526	0.39718	0
Q53HG7;A0A384MDY8;Q14247;A0A024R5M3;B4E358;H0YCD9;H0YEV2	446;446;446;409;130;103;80	Q53HG7	Q53HG7	Src substrate cortactin	CTTN		0.502413	6.56823	0.00015165	53.448	43.109	53.448	0.492264	7.46532	0.000672385	41.644	0.502413	6.56823	0.00015165	53.448	0	0		NaN		1	Y	LSYRGPVSGTEPEPVYSMEAADYREASSQQG	X;X;X;X;X;X;X;X;X;X;X;X;X;X;X;B2;X;X;X;X;X;X;X;X;X;X;X;X;X;X;X	XXXXPPPPPPPPPPPPPPPPPPPPXXXXXXX	GPVS(0.021)GT(0.111)E(0.111)PE(0.111)PVY(0.502)S(0.111)M(0.025)E(0.006)AAD(0.002)YR	GPVS(-13.72)GT(-6.57)E(-6.57)PE(-6.57)PVY(6.57)S(-6.57)M(-12.97)E(-19.18)AAD(-25.16)Y(-31.9)R(-37.51)	12	2	-1.5421		By MS/MS	By matching	40201000	40201000	0	0	0.25464	0	19633000	20568000	0	0.26193	0.40097
A0A0K0K1K4;O14818;Q05DH1;H0Y586;B0YJ74;Q8TAA3;A0A087WYS6;Q4G1B8	145;145;145;71;109;153;121;121	A0A0K0K1K4	A0A0K0K1K4	Proteasome subunit alpha type-7;Proteasome subunit alpha type;Proteasome subunit alpha type-7-like	PSMA7;PSMA8		0.971332	15.6245	0.000151996	60.55	37.196	60.55	0.971332	15.6245	0.000151996	60.55	0.926916	12.2011	0.00112205	47.301	0.93662	13.174	0.000726328	50.102		1	Y	SALIVGFDFDGTPRLYQTDPSGTYHAWKANA	X;X;X;X;X;X;X;X;X;X;X;X;X;X;X;B2;X;X;X;X;X;X;X;X;X;X;X;X;X;X;X	XXXXXXXXXXXXXXPPPPPPPPPPPPPPXXX	LY(0.971)Q(0.027)T(0.002)DPSGTYHAWK	LY(15.62)Q(-15.62)T(-27.85)D(-33.29)PS(-52.21)GT(-55.18)Y(-55.01)H(-57.89)AW(-60.52)K(-60.55)	2	3	0.078154	By MS/MS	By MS/MS	By MS/MS	855940000	855940000	0	0	15.99	233240000	269450000	353250000	18.636	12.198	18.666
O43709;F8WD87;F8WD67;E9PCQ7;B4DK37	18;18;18;18;18	O43709	O43709	Probable 18S rRNA (guanine-N(7))-methyltransferase	WBSCR22		0.690688	5.73202	0.000153035	52.814	44.917	52.814					0.690688	5.73202	0.000153035	52.814	0	0		NaN		1	Y	SRGRRPEHGGPPELFYDETEARKYVRNSRMI	X;X;X;X;X;X;X;X;X;X;X;X;X;X;X;B2;X;X;X;X;X;X;X;X;X;X;X;X;X;X;X	XXXXPPPPPPPPPPPPPPPPPPXXXXXXXXX	RPE(0.001)H(0.002)GGPPE(0.051)LFY(0.691)D(0.185)E(0.051)T(0.015)E(0.004)AR(0.001)	R(-35.57)PE(-30.76)H(-25.98)GGPPE(-11.3)LFY(5.73)D(-5.73)E(-11.3)T(-16.69)E(-21.87)AR(-30.8)	12	3	0.15481		By MS/MS	By matching	61795000	61795000	0	0	0.60678	0	28785000	33009000	0	0.70413	0.96186
V9HW63;Q13162;A6NG45	60;60;60	V9HW63	V9HW63	Peroxiredoxin-4	HEL-S-97n;PRDX4		0.571053	5.37958	0.000155845	49.638	45.603	49.638	0.571053	5.37958	0.000155845	49.638										1	Y	RTREEECHFYAGGQVYPGEASRVSVADHSLH	X;X;X;X;X;X;X;X;X;X;X;X;X;X;X;B2;X;X;X;X;X;X;X;X;X;X;X;X;X;X;X	XPPPPPPPPPPPPPPPPPPPPPXXXXXXXXX	TREEECH(0.001)FY(0.011)AGGQ(0.165)VY(0.571)PGE(0.165)AS(0.041)R(0.045)	T(-42.53)R(-42.53)E(-42.53)E(-42.68)E(-39.24)C(-34.51)H(-29.21)FY(-17.25)AGGQ(-5.38)VY(5.38)PGE(-5.38)AS(-11.4)R(-11.05)	15	4	-0.71983	By MS/MS			32024000	32024000	0	0	0.24626	32024000	0	0	0.89639	0	0
A0A024R329;Q9Y5P6	10;10	A0A024R329	A0A024R329	Mannose-1-phosphate guanyltransferase beta	GMPPB		0.747247	5.40721	0.00015832	85.862	61.518	85.862	0.618512	4.53429	0.00052521	72.042	0.747247	5.40721	0.00015832	85.862	0.692285	5.35347	0.000406113	76.17		1	Y	______MKALILVGGYGTRLRPLTLSTPKPL	X;X;X;X;X;X;X;X;X;X;X;X;X;X;X;B2;X;X;X;X;X;X;X;X;X;X;X;X;X;X;X	XXXXXXXXPPPPPPPPPPPXXXXXXXXXXXX	ALILVGGY(0.747)GT(0.215)R(0.038)	ALILVGGY(5.41)GT(-5.41)R(-12.98)	8	2	-0.89405	By MS/MS	By MS/MS	By MS/MS	78526000	78526000	0	0	NaN	21590000	26650000	30286000	NaN	NaN	NaN
A8KAQ5;A0A024QZD5;P08621;B3KPV0	219;219;219;123	A8KAQ5	A8KAQ5	U1 small nuclear ribonucleoprotein 70 kDa	SNRP70;SNRNP70		0.666314	3.01583	0.000161145	79.089	46.248	79.089	0.499623	0	0.000161145	71.806	0.666314	3.01583	0.00016729	79.089	0.493015	0	0.000694346	54.524		1	Y	ADVNIRHSGRDDTSRYDERPGPSPLPHRDRD	X;X;X;X;X;X;X;X;X;X;X;X;X;X;X;B2;X;X;X;X;X;X;X;X;X;X;X;X;X;X;X	XXXXXXXXXXXXXXXPPPPPPPPPPPPPXXX	Y(0.666)D(0.333)E(0.001)RPGPSPLPHR	Y(3.02)D(-3.02)E(-28.53)R(-45.88)PGPS(-66.71)PLPH(-76.6)R(-79.09)	1	3	-0.42488		By MS/MS		71069000	71069000	0	0	NaN	0	71069000	0	NaN	NaN	NaN
O43681;B4DEE5	302;282	O43681	O43681	ATPase ASNA1	ASNA1		0.95787	15.1532	0.000161216	54.281	37.505	51.265	0.894379	11.1194	0.000902629	44.045	0.95787	15.1532	0.000265342	51.265	0.945514	13.3186	0.000161216	54.281		1	Y	KPCKMCEARHKIQAKYLDQMEDLYEDFHIVK	X;X;X;X;X;X;X;X;X;X;X;X;X;X;X;B2;X;X;X;X;X;X;X;X;X;X;X;X;X;X;X	XXXXXXXXXXXXXXXPPPPPPPPPPPPPPPP	Y(0.958)LD(0.029)Q(0.008)M(0.003)E(0.001)DLYEDFHIVK	Y(15.15)LD(-15.15)Q(-20.85)M(-24.71)E(-28.3)D(-35.63)LY(-44.07)E(-46.09)D(-47.82)FH(-50.33)IVK(-51.26)	1	3	0.3303	By MS/MS	By MS/MS	By MS/MS	220940000	220940000	0	0	0.63283	104640000	46361000	69935000	1.1172	0.34352	0.58033
V9GZ55;K7ENR6;Q969U7;Q9P1R6;Q9P0C1	135;127;127;119;119	V9GZ55	V9GZ55	Proteasome assembly chaperone 2	PSMG2		0.688244	7.25502	0.000161559	80.69	56.355	80.69									0.688244	7.25502	0.000161559	80.69		1	Y	SSGCARVIVLSSSHSYQRNDLQLRSTPFRYL	X;X;X;X;X;X;X;X;X;X;X;X;X;X;X;B2;X;X;X;X;X;X;X;X;X;X;X;X;X;X;X	XXXXXXPPPPPPPPPPPPXXXXXXXXXXXXX	VIVLSS(0.001)S(0.003)H(0.002)S(0.077)Y(0.688)Q(0.099)R(0.129)	VIVLS(-37.01)S(-30.34)S(-23.52)H(-25.43)S(-9.51)Y(7.26)Q(-8.4)R(-7.26)	10	3	-0.70414			By MS/MS	60330000	60330000	0	0	3.4879	0	0	60330000	0	0	10.523
P54136;E5RJM9	92;92	P54136	P54136	Arginine--tRNA ligase, cytoplasmic	RARS		0.65428	7.21863	0.00016204	49.528	29.766	49.528									0.65428	7.21863	0.00016204	49.528		1	Y	ISRLQEVFGHAIKAAYPDLENPPLLVTPSQQ	X;X;X;X;X;X;X;X;X;X;X;X;X;X;X;B2;X;X;X;X;X;X;X;X;X;X;X;X;X;X;X	XXXXXXXXXXXXXPPPPPPPPPPPPPPPPPP	AAY(0.654)PD(0.108)LE(0.113)N(0.124)PPLLVTPSQQAK	AAY(7.22)PD(-7.82)LE(-7.62)N(-7.22)PPLLVT(-40.28)PS(-45.11)Q(-48.23)Q(-48.95)AK(-49.5)	3	3	1.3748			By MS/MS	25241000	25241000	0	0	0.44302	0	0	25241000	0	0	1.5211
Q14126	968	Q14126	Q14126	Desmoglein-2	DSG2		0.815382	10.9135	0.000162289	46.273	23.74	46.273					0.815382	10.9135	0.000162289	46.273						1	Y	LGPSQPQSLIVTERVYAPASTLVDQPYANEG	X;X;X;X;X;X;X;X;X;X;X;X;X;X;X;B2;X;X;X;X;X;X;X;X;X;X;X;X;X;X;X	XXXXXXXXXXXXXXPPPPPPPPPPPPPPPPP	VY(0.815)APAS(0.066)T(0.066)LVD(0.025)Q(0.025)PY(0.002)ANEGTVVVTER	VY(10.91)APAS(-10.91)T(-10.91)LVD(-15.09)Q(-15.09)PY(-27.17)AN(-36.02)E(-38.84)GT(-41.04)VVVT(-46.11)E(-46.11)R(-46.25)	2	3	-2.1749		By MS/MS		41533000	41533000	0	0	NaN	0	41533000	0	NaN	NaN	NaN
A0A024R542;Q9C0C2;B3KXS7;A0A2R8Y5C4	778;778;611;102	A0A024R542	A0A024R542	182 kDa tankyrase-1-binding protein	TNKS1BP1		0.998613	28.5762	0.000162936	85.533	65.897	76.282	0.994353	22.4576	0.000162936	85.533	0.97521	15.949	0.000703676	66.321	0.998613	28.5762	0.000403074	76.282		1	Y	PRGDPGLGERDWTSKYGQGAGEGSTREWASR	X;X;X;X;X;X;X;X;X;X;X;X;X;X;X;B2;X;X;X;X;X;X;X;X;X;X;X;X;X;X;X	XXXXXXXXXXXXXXXPPPPPPPPPPPXXXXX	Y(0.999)GQ(0.001)GAGEGSTR	Y(28.58)GQ(-28.58)GAGE(-61.07)GS(-71.63)T(-71.67)R(-76.28)	1	2	-0.22291	By MS/MS	By MS/MS	By MS/MS	73042000	73042000	0	0	NaN	16430000	23637000	32975000	NaN	NaN	NaN
A0A024R8P8;P63173;J3KT73;J3QL01	43;43;43;43	A0A024R8P8	A0A024R8P8	60S ribosomal protein L38	RPL38		0.912424	10.7139	0.000165023	82.75	57.932	72.089	0.900764	10.1644	0.000165023	82.75	0.912424	10.7139	0.000267914	80.219	0.900772	10.1644	0.000436762	76.064		1	Y	NKDNVKFKVRCSRYLYTLVITDKEKAEKLKQ	X;X;X;X;X;X;X;X;X;X;X;X;X;X;X;B2;X;X;X;X;X;X;X;X;X;X;X;X;X;X;X	XXXXXXXXXXXXXPPPPPPPPPPPPXXXXXX	Y(0.077)LY(0.912)T(0.01)LVITDKEK	Y(-10.71)LY(10.71)T(-19.53)LVIT(-51.63)D(-58.41)K(-64.36)E(-66.81)K(-66.7)	3	3	-0.16697	By MS/MS	By MS/MS	By MS/MS	593860000	593860000	0	0	NaN	118200000	105270000	89412000	NaN	NaN	NaN
A0A248RGE3;Q5RKT7;B2RDW1;P62979;A0A2R8Y422;Q8WYN9	137;148;148;148;148;113	A0A248RGE3	A0A248RGE3	Ubiquitin-40S ribosomal protein S27a;Ubiquitin;40S ribosomal protein S27a	RPS27A;HEL112		0.915904	12.7957	0.000165142	77.74	73.026	77.74	0.81637	8.20801	0.000181448	62.732	0.734575	5.1652	0.000181448	62.732	0.915904	12.7957	0.000165142	77.74		1	Y	ASHFDRHYCGKCCLTYCFNKPEDK_______	X;X;X;X;X;X;X;X;X;X;X;X;X;X;X;B2;X;X;X;X;X;X;X;X;X;X;X;X;X;X;X	XXXXXXXXXXXPPPPPPPPPPPPPXXXXXXX	CCLT(0.035)Y(0.916)C(0.048)FNKPEDK	C(-34.94)C(-34.94)LT(-14.14)Y(12.8)C(-12.8)FN(-42.66)K(-46.88)PE(-58.35)D(-64.86)K(-64.6)	5	3	-0.85704	By MS/MS	By MS/MS	By MS/MS	848330000	848330000	0	0	NaN	256330000	258680000	333320000	NaN	NaN	NaN
I7GPQ7;Q92541	499;624	I7GPQ7	I7GPQ7	RNA polymerase-associated protein RTF1 homolog	RTF1		0.751794	4.81289	0.000165443	85.355	68.428	74.841	0.746034	4.67984	0.000303103	79.974	0.74544	4.66622	0.000165443	85.355	0.751794	4.81289	0.000442089	74.841		1	Y	DPAVQAAILAQLNAKYGSGVLPDAPKEMSKG	X;X;X;X;X;X;X;X;X;X;X;X;X;X;X;B2;X;X;X;X;X;X;X;X;X;X;X;X;X;X;X	XXXXXXXXXXXXXXXPPPPPPPPPPPXXXXX	Y(0.752)GS(0.248)GVLPDAPK	Y(4.81)GS(-4.81)GVLPD(-56.4)APK(-74.84)	1	2	0.11276	By MS/MS	By MS/MS	By MS/MS	154620000	154620000	0	0	NaN	45663000	47904000	61054000	NaN	NaN	NaN
Q53HG7;A0A384MDY8;Q14247;A0A024R5M3;B3KRK4;B4E358;H0YCD9;H0YEV2	421;421;421;384;105;105;78;55	Q53HG7	Q53HG7	Src substrate cortactin	CTTN		0.903767	12.9602	0.000171827	61.958	46.329	61.958	0.864339	12.797	0.000629586	54.486	0.903767	12.9602	0.000171827	61.958	0.619317	5.23131	0.0014524	49.189		1	Y	PAPQPTEERLPSSPVYEDAASFKAELSYRGP	X;X;X;X;X;X;X;X;X;X;X;X;X;X;X;B2;X;X;X;X;X;X;X;X;X;X;X;X;X;X;X	XXXXXXXXXPPPPPPPPPPPPPPXXXXXXXX	LPS(0.006)S(0.046)PVY(0.904)E(0.035)D(0.01)AASFK	LPS(-22.04)S(-12.96)PVY(12.96)E(-14.11)D(-19.75)AAS(-35.91)FK(-46.95)	7	2	-0.93658	By MS/MS	By MS/MS	By MS/MS	169760000	169760000	0	0	NaN	49125000	60332000	60301000	NaN	NaN	NaN
A0A2R8Y851;P62273	7;7	A0A2R8Y851	A0A2R8Y851	40S ribosomal protein S29	RPS29		0.960563	14.6131	0.000174255	80.24	64.847	80.24	0.460819	0.652475	0.00171495	59.542	0.960563	14.6131	0.000174255	80.24	0.959226	17.0561	0.000260342	74.841		1	Y	_________MGHQQLYWSHPRKFGQGSRSCR	X;X;X;X;X;X;X;X;X;X;X;X;X;X;X;B2;X;X;X;X;X;X;X;X;X;X;X;X;X;X;X	XXXXXXXXXXPPPPPPPPPPPXXXXXXXXXX	GHQ(0.001)Q(0.033)LY(0.961)W(0.003)S(0.001)H(0.001)PR	GH(-39.62)Q(-29.79)Q(-14.61)LY(14.61)W(-24.43)S(-29.79)H(-31.8)PR(-48.4)	6	3	-0.15279		By MS/MS	By MS/MS	304720000	304720000	0	0	7.5518	0	110090000	194640000	0	5.8588	13.638
A0A024R5H0;O75531;B2R4V4	43;43;43	A0A024R5H0	A0A024R5H0	Barrier-to-autointegration factor;Barrier-to-autointegration factor, N-terminally processed	BANF1		1	67.7144	0.000174457	87.476	54.966	87.476	1	67.7144	0.000174457	87.476					0.999818	37.5096	0.00264439	53.753		1	Y	EVLGKKLEERGFDKAYVVLGQFLVLKKDEDL	X;X;X;X;X;X;X;X;X;X;X;X;X;X;X;B2;X;X;X;X;X;X;X;X;X;X;X;X;X;X;X	XXXXXXXXXXXXXXPPPPPPPPPPPPXXXXX	AY(1)VVLGQFLVLK	AY(67.71)VVLGQ(-67.71)FLVLK(-87.48)	2	2	-3.6088	By MS/MS		By matching	54966000	54966000	0	0	0.063166	22110000	0	32856000	0.1632	0	0.09347
V9HWB4;P11021	635;635	V9HWB4	V9HWB4	78 kDa glucose-regulated protein	HEL-S-89n;HSPA5		0.955897	13.5114	0.000176658	53.3	47.197	41.621	0.955897	13.5114	0.000495245	49.298	0.499909	0	0.000353305	50.897	0.946617	12.4987	0.000176658	53.3		1	Y	KKELEEIVQPIISKLYGSAGPPPTGEEDTAE	X;X;X;X;X;X;X;X;X;X;X;X;X;X;X;B2;X;X;X;X;X;X;X;X;X;X;X;X;X;X;X	XXXXXXXXXXXXXXPPPPPPPPPPPPPPPPP	LY(0.956)GS(0.043)AGPPPTGEEDTAEKDEL	LY(13.51)GS(-13.51)AGPPPT(-34.16)GE(-36.74)E(-36.74)D(-37.3)T(-37.3)AE(-36.99)K(-41.62)D(-41.62)E(-41.62)L	2	2	0.38368	By MS/MS	By MS/MS	By MS/MS	517980000	517980000	0	0	0.36127	15748000	12782000	0	0.037873	0.02555	0
A8K878;P55145	79;76	A8K878	A8K878	Mesencephalic astrocyte-derived neurotrophic factor	MANF		0.897903	11.6503	0.00017673	73.632	63.443	59.864	0.897903	11.6503	0.00017673	59.864	0	0		NaN	0.492824	0	0.00255683	73.632		1	Y	IKFCREARGKENRLCYYIGATDDAATKIINE	X;X;X;X;X;X;X;X;X;X;X;X;X;X;X;B2;X;X;X;X;X;X;X;X;X;X;X;X;X;X;X	XXXXXXXXXXXXXPPPPPPPPPPPPPPXXXX	LC(0.041)Y(0.898)Y(0.061)IGATDDAATK	LC(-13.45)Y(11.65)Y(-11.65)IGAT(-40.17)D(-42.46)D(-47.13)AAT(-57.5)K(-57.44)	3	3	-0.43862	By MS/MS	By matching		116180000	116180000	0	0	NaN	64527000	51657000	0	NaN	NaN	NaN
F8VQE1;B4DN52;Q53GG0;Q9UHB6;F8VS07;B3KTW2	268;348;429;429;126;127	F8VQE1	F8VQE1	LIM domain and actin-binding protein 1	LIMA1		0.848465	7.92224	0.000177581	78.548	65.374	71.888	0.811918	6.44445	0.000229938	71.085	0.796274	6.01699	0.000177581	78.548	0.848465	7.92224	0.000224949	71.888		1	Y	CFRCSYCNNKLSLGTYASLHGRIYCKPHFNQ	X;X;X;X;X;X;X;X;X;X;X;X;X;X;X;B2;X;X;X;X;X;X;X;X;X;X;X;X;X;X;X	XXXXXXXXXXPPPPPPPPPPPPXXXXXXXXX	LS(0.012)LGT(0.137)Y(0.848)AS(0.003)LHGR	LS(-18.52)LGT(-7.92)Y(7.92)AS(-25.01)LH(-45.76)GR(-51.3)	6	3	-0.39275	By MS/MS	By MS/MS	By MS/MS	440880000	440880000	0	0	4.4467	139240000	140180000	161460000	4.9338	4.1899	4.3091
Q9NYF8;E9PK91;Q6DCA8;A0A1W2PQ43;E9PK09;E9PQN2;E9PKI6;E9PJA7	219;219;219;219;219;217;219;217	Q9NYF8	Q9NYF8	Bcl-2-associated transcription factor 1	BCLAF1		0.620284	4.18362	0.000180102	48.919	37.003	48.919	0.620284	4.18362	0.000180102	48.919										1	Y	KSSATSGDIWPGLSAYDNSPRSPHSPSPIAT	X;X;X;X;X;X;X;X;X;X;X;X;X;X;X;B2;X;X;X;X;X;X;X;X;X;X;X;X;X;X;X	XPPPPPPPPPPPPPPPPPPPPXXXXXXXXXX	SSATSGDIW(0.001)PGLS(0.092)AY(0.62)D(0.237)N(0.028)S(0.012)PR(0.01)	S(-41.24)S(-41.24)AT(-38.24)S(-35.8)GD(-35.8)IW(-28.75)PGLS(-8.27)AY(4.18)D(-4.18)N(-13.48)S(-17.28)PR(-17.95)	15	3	-2.4646	By MS/MS			48622000	48622000	0	0	1.2902	48622000	0	0	3.9219	0	0
A0A3B3IUA7;Q14258;Q59GW5;D3DTY9	323;323;337;115	A0A3B3IUA7	A0A3B3IUA7	E3 ubiquitin/ISG15 ligase TRIM25	TRIM25		0.999959	44.1276	0.000180817	78.116	60.68	78.116	0.999959	44.1276	0.000180817	78.116	0.999675	36.2175	0.000606013	57.225	0.99942	32.5396	0.00070688	62.894		1	Y	LEKASKLRGISTKPVYIPEVELNHKLIKGIH	X;X;X;X;X;X;X;X;X;X;X;X;X;X;X;B2;X;X;X;X;X;X;X;X;X;X;X;X;X;X;X	XXXXXXXXXXXXXPPPPPPPPPPPPXXXXXX	PVY(1)IPEVELNHK	PVY(44.13)IPE(-44.13)VE(-56.44)LN(-72.4)H(-75.17)K(-75.08)	3	3	-0.8629	By MS/MS	By MS/MS	By matching	171680000	171680000	0	0	NaN	52557000	47241000	71879000	NaN	NaN	NaN
B4DKU3;Q8IY81	120;241	B4DKU3	B4DKU3	pre-rRNA processing protein FTSJ3	FTSJ3		0.89485	9.54638	0.000184009	59.663	43.46	59.663	0.89485	9.54638	0.000184009	59.663	0.822934	6.74731	0.000198984	59.248	0.538959	0.78999	0.000385049	54.09		1	Y	TVTELVTKKKPKAEGYAEGDLTLYHRTSVTD	X;X;X;X;X;X;X;X;X;X;X;X;X;X;X;B2;X;X;X;X;X;X;X;X;X;X;X;X;X;X;X	XXXXXXXXXXXXPPPPPPPPPPPPPPXXXXX	AE(0.099)GY(0.895)AE(0.005)GD(0.001)LTLYHR	AE(-9.55)GY(9.55)AE(-22.85)GD(-29.18)LT(-40.42)LY(-51.69)H(-55.6)R(-57.36)	4	3	2.4783	By MS/MS	By MS/MS	By MS/MS	54861000	54861000	0	0	NaN	17118000	23361000	14381000	NaN	NaN	NaN
Q86W42	334	Q86W42	Q86W42	THO complex subunit 6 homolog	THOC6		0.878787	8.6141	0.000184195	82.279	57.385	82.279	0.851562	7.76638	0.00571083	43.308	0.878787	8.6141	0.000184195	82.279	0.795535	5.91472	0.00102858	66.351		1	Y	AAGNSCRVDVFTNLGYRAFSLSF________	X;X;X;X;X;X;X;X;X;X;X;X;X;X;X;B2;X;X;X;X;X;X;X;X;X;X;X;X;X;X;X	XXXXXXXPPPPPPPPPPXXXXXXXXXXXXXX	VDVFTNLGY(0.879)R(0.121)	VD(-77.86)VFT(-55.18)N(-34.7)LGY(8.61)R(-8.61)	9	2	-0.9487	By MS/MS	By MS/MS	By MS/MS	106220000	106220000	0	0	NaN	24446000	31373000	45025000	NaN	NaN	NaN
Q13263;B2R8R5;M0R2I3;M0R3C0	242;242;154;108	Q13263	Q13263	Transcription intermediary factor 1-beta	TRIM28		0.95496	14.255	0.000184688	86.898	65.634	86.898					0.805469	7.55685	0.000237819	69.815	0.95496	14.255	0.000184688	86.898		1	Y	LTCRDCQLNAHKDHQYQFLEDAVRNQRKLLA	X;X;X;X;X;X;X;X;X;X;X;X;X;X;X;B2;X;X;X;X;X;X;X;X;X;X;X;X;X;X;X	XXXXXXXXXXXXPPPPPPPPPPPPXXXXXXX	D(0.004)H(0.004)Q(0.036)Y(0.955)Q(0.002)FLEDAVR	D(-24.08)H(-24.08)Q(-14.26)Y(14.26)Q(-27.47)FLE(-50.94)D(-60.96)AVR(-71.63)	4	2	0.18984		By MS/MS	By MS/MS	177780000	177780000	0	0	2.0927	0	32367000	45593000	0	1.122	1.1839
[truncated: 1,377 more rows]
[truncated: 31 more columns]

## Sheet: Modified peptides_homo_Repeat 2
Proteins	Positions within proteins	Leading proteins	Protein	Protein names	Gene names	Fasta headers	Localization prob	Score diff	PEP	Score	Delta score	Score for localization	Localization prob DADPSE2-1	Score diff DADPSE2-1	PEP DADPSE2-1	Score DADPSE2-1	Localization prob DADPSE2-2	Score diff DADPSE2-2	PEP DADPSE2-2	Score DADPSE2-2	Localization prob DADPSE2-3	Score diff DADPSE2-3	PEP DADPSE2-3	Score DADPSE2-3	Diagnostic peak	Number of B2	Amino acid	Sequence window	Modification window	Peptide window coverage	B2 Probabilities	B2 Score diffs	Position in peptide	Charge	Mass error [ppm]	Identification type DADPSE2-1	Identification type DADPSE2-2	Identification type DADPSE2-3	Intensity	Intensity___1	Intensity___2	Intensity___3	Ratio mod/base	Intensity DADPSE2-1	Intensity DADPSE2-2	Intensity DADPSE2-3	Ratio mod/base DADPSE2-1	Ratio mod/base DADPSE2-2	Ratio mod/base DADPSE2-3
[truncated: 2,262 more rows]
[truncated: 31 more columns]

[truncated: 5 more sheets: Protein_ADT_Repeat 1, Protein_ADT_Repeat 2, Protein_Approve_Repeat 1, Protein_Approve_Repeat 2, KRas_Probe 8]
